# Supplementary material for: Prostate cancer small non-coding RNA transcriptome in Arabs
Source: J Transl Med. 2017 Dec 21;15:260. doi: 10.1186/s12967-017-1362-x (PMC5740966; doi:10.1186/s12967-017-1362-x)
Supplement: Supplementary file 2 — Additional file 2: Table S4. miRNA reads summary. [file 12967_2017_1362_MOESM2_ESM.xlsx]

## Sheet: Table S4
Table S4 miRNA reads summary
miRNA	Sample
	Q1N	Q1T	Q2N	Q2T	Q3N	Q3T	Q4N	Q4T	Q5N	Q5T	S1N	S1T	S2N	S2T	S3N	S3T	S4N	S4T	S5N	S5T	Total
hsa-miR-143-3p	10745260	4977254	5847769	1740804	14487142	9074344	22264010	15185295	15268658	11060631	7093564	2051981	10534795	4360925	11243378	6641190	16270372	18180576	19704460	8302974	215035382
hsa-miR-10b-5p	1631778	2784912	1711728	1285504	4006075	3984746	3119621	3185846	3326349	3170204	5939891	3301683	5903231	2089067	2672828	4749709	10256975	1950436	6059155	9987523	81117261
hsa-miR-99b-5p	1458948	1282120	794220	184941	473728	347946	520714	555874	842637	616098	580865	302672	517303	324177	488742	603793	604507	437460	636237	474760	12047742
hsa-miR-375	44004	596941	614152	4935414	87988	467743	55174	138185	8502	223678	148162	296070	94893	552188	107484	616269	176627	48475	174423	36583	9422955
hsa-miR-191-5p	642029	1421793	1081733	1602832	204726	358729	330686	273365	105901	302601	123016	217316	110646	431598	243542	480062	252063	188028	614121	263203	9247990
hsa-miR-26a-5p	456366	603891	274202	700408	437995	421850	982907	587729	115768	744178	76779	29445	61222	117112	203370	109626	197924	684957	958098	402392	8166219
hsa-miR-27b-3p	484869	381664	330086	206994	362896	267444	1248942	538439	215512	776709	57962	31008	78468	90140	229310	134177	275223	772013	850540	404387	7736783
hsa-miR-100-5p	661550	530190	361262	105418	408611	301320	526933	562562	392338	603746	239485	78366	175599	134723	338383	255683	338360	389228	740262	459405	7603424
hsa-miR-10a-5p	177281	326198	171004	122517	533080	230260	362755	422771	249634	390215	191580	88348	301088	109732	494994	553390	367164	286615	609427	731353	6719406
hsa-let-7a-5p	250467	591696	477230	972519	222625	400571	157095	95739	117858	145427	572761	223257	323305	337361	181413	219135	121558	85123	246088	203180	5944408
hsa-miR-148a-3p	34824	167227	278274	921346	124318	384842	218042	359780	15106	445075	102969	351710	61210	269965	83101	189505	205404	158424	255638	94644	4721404
hsa-miR-125a-5p	354588	1325493	173722	284853	105673	83600	93617	143156	145341	191844	115484	123012	78416	156186	265768	175225	143405	101428	263893	120292	4444996
hsa-let-7f-5p	206226	313089	268582	473293	166451	215171	196379	122316	168966	149549	254896	142903	183054	149075	203954	155204	157244	98103	225736	221806	4071997
hsa-miR-22-3p	491861	427653	348408	418751	142684	139066	341420	156739	57144	195537	21546	15260	30455	65175	63677	36573	68873	205774	345998	232006	3804600
hsa-miR-99a-5p	201702	201005	172603	156967	264593	251973	316881	218807	53116	285002	78394	21762	82973	98520	128248	144808	104526	175457	362396	206144	3525877
hsa-miR-486-5p	345912	97173	55488	85754	107915	49775	20814	14774	701976	140830	52027	171018	92993	41418	125749	240276	128039	46968	79582	670136	3268617
hsa-miR-30a-5p	95547	103654	159961	61698	106083	151713	578926	188231	82834	320511	51374	15824	59176	45853	53348	31348	152728	307292	318079	146010	3030190
hsa-miR-181a-5p	182370	293608	277877	218456	88024	125286	197837	103234	34639	192375	118671	39733	95907	78969	108132	81016	178734	125830	213771	187486	2941955
hsa-let-7c	173818	196540	199148	347474	123514	162760	96634	37249	43545	90406	154903	59881	121427	156514	100312	121344	87624	54136	172915	138987	2639131
hsa-miR-182-5p	51545	163328	176297	504050	49854	154350	67711	95920	8346	117207	66408	189468	30085	93279	38400	308444	121223	32317	111997	33111	2413340
hsa-miR-92a-3p	152206	198686	150574	577689	62582	112253	62160	60803	29145	90535	49004	88730	34048	158937	68665	70774	46476	44677	129883	57043	2244870
hsa-miR-21-5p	174235	76365	59818	78666	168640	199351	186767	142036	38242	128916	152830	44950	67100	123641	103759	125464	61667	84867	148717	35656	2201687
hsa-miR-125b-5p	123365	281809	69449	235996	43197	39473	43798	35134	23169	52395	32568	31529	28287	67805	77023	83511	43203	28992	96925	50621	1488249
hsa-miR-30d-5p	45284	92827	99033	322043	39885	80983	73064	58603	17008	79913	14960	15230	12677	65694	26926	22726	34704	53347	111881	52032	1318820
hsa-miR-28-3p	130085	111565	89061	143555	30788	23841	32383	20390	111186	36524	40008	33214	45581	41080	64207	113559	81461	27409	53377	35121	1264395
hsa-miR-145-5p	50519	46799	16859	10332	75128	39316	147282	40847	110280	40889	100695	19361	75044	35122	43285	47322	112631	71834	111108	53642	1248295
hsa-let-7b-5p	95159	99227	170175	229778	40012	57149	27501	15245	9103	27914	28900	14457	21217	35354	35036	28925	17005	17019	62577	35529	1067282
hsa-let-7i-5p	78350	43120	47645	45457	52895	49582	59165	31145	42664	45774	74903	24974	44768	23595	36115	42967	41126	33151	60468	79788	957652
hsa-miR-141-3p	8944	43171	69891	148909	51425	134501	60095	88362	258	79823	4631	7046	1812	24376	13335	4051	7591	49360	68519	6192	872292
hsa-miR-151a-3p	44967	59447	68796	102960	28774	34964	36379	28579	22607	39903	28773	17091	29581	50376	41992	49536	48153	23912	49862	43741	850393
hsa-miR-146b-5p	55064	41256	66381	64330	32078	44880	68275	59126	8640	81814	40370	14626	18469	28215	66476	42397	25041	37338	29015	24374	848165
hsa-miR-127-3p	105132	42584	51751	29031	36500	29251	64078	32714	25488	81748	9149	10461	9988	18716	19179	25346	26627	54973	65906	85721	824343
hsa-miR-423-5p	197924	43102	137956	270713	3341	2432	4089	2234	6899	6110	4599	16139	4218	12601	8451	14464	4860	2415	6542	15063	764152
hsa-let-7g-5p	39718	51231	44712	47074	49434	57968	56075	27477	8364	36774	28065	7715	18109	24644	22664	11791	10854	28801	54695	30378	656543
hsa-miR-126-5p	29719	12942	17477	12919	52830	46854	72995	59860	5827	78296	3196	1648	3020	7130	8600	2715	8989	72942	99746	47064	644769
hsa-miR-151a-5p	48381	72506	36582	129380	23525	30534	27036	20153	10897	25845	7084	4196	6731	20034	21825	12525	15030	16448	52392	18863	599967
hsa-miR-92b-3p	124611	101083	23000	51846	10985	6367	5314	12431	18359	10709	14016	22909	10069	30846	51709	42898	15517	6163	23499	5649	587980
hsa-miR-26b-5p	21601	38836	32669	45228	32334	42597	90390	41700	5639	62689	6167	2421	4235	13442	8567	6052	10277	44838	61371	16022	587075
hsa-miR-199a-3p	37841	24515	19619	13290	25120	20760	100216	40463	6339	57466	6636	2888	7032	9382	12477	10602	11884	54433	55545	31782	548290
hsa-miR-199b-3p	37831	24501	19617	13276	25118	20756	100181	40454	6339	57430	6630	2888	7032	9382	12475	10568	11880	54420	55515	31746	548039
hsa-miR-186-5p	29215	36218	36742	35579	31688	30619	84379	29858	5123	43015	3791	3220	5570	17604	13493	5794	9273	34503	50763	24868	531315
hsa-miR-25-3p	14166	22084	28366	55257	24525	39188	22524	14895	13688	21045	26712	21195	16621	43530	18157	38071	23612	13749	32498	27527	517410
hsa-miR-221-3p	63987	28206	18966	4811	27128	21444	104697	14140	21084	24889	16804	1671	36920	17580	10749	5003	13514	27832	44602	9804	513831
hsa-miR-16-5p	24441	27939	26684	51276	30726	30410	71428	34674	3711	45256	2781	2566	2285	6001	8042	5143	8305	31183	64455	33797	511103
hsa-miR-205-5p	4687	105885	30001	10938	46180	42231	43611	12648	1165	25978	14079	228	9532	12784	21677	1764	20166	16699	63330	4185	487768
hsa-miR-183-5p	11748	38510	46148	102573	14003	47963	19389	27021	843	30028	8555	13330	4801	14528	5475	20665	9584	9994	25580	5325	456063
hsa-miR-378a-3p	21517	28161	24128	13347	11884	8318	24958	10158	21035	15804	9257	3347	21208	15018	16267	10345	19180	12138	33458	119625	439153
hsa-miR-222-3p	80424	63170	30619	17385	9848	6886	34262	8474	23244	16908	9293	2497	27860	21174	16277	5988	15831	12548	29921	6497	439106
hsa-let-7e-5p	87935	44596	64943	32478	9154	8077	8809	3395	17170	7492	27674	11975	21904	16490	20140	15356	8238	4713	12658	14228	437425
hsa-miR-192-5p	3113	4916	5815	14704	9772	13901	16945	9971	2959	14522	6214	4315	8898	6980	205643	8702	12641	8872	18615	10322	387820
hsa-miR-103a-3p	16943	25327	26232	31083	18364	25385	27109	7507	10555	12089	19877	9427	8959	13651	6943	13990	11372	9121	20998	15521	330453
hsa-miR-133a	12956	14343	8949	3966	7731	5745	12930	4997	9678	16645	3629	1435	4340	3937	4705	1622	4671	10951	40245	154601	328076
hsa-miR-125b-2-3p	30240	22226	31788	42878	11714	9712	14567	8592	7434	15157	7245	4246	8773	12845	11731	12601	14485	9657	17376	18779	312046
hsa-miR-145-3p	26244	17945	15725	6209	19597	12749	29336	31164	9700	20182	3999	1546	3278	6829	12495	5689	7530	27380	35576	10449	303622
hsa-miR-30e-5p	6883	10169	11646	10829	11451	14026	44049	22899	2454	27050	1974	705	1480	4088	3902	1893	4923	22902	32522	11252	247097
hsa-miR-204-5p	20364	5452	9974	1765	24714	5939	17839	4238	10711	8686	5639	3797	9031	3212	17272	16383	24686	18087	9629	19260	236678
hsa-miR-320a	55836	16040	33222	14638	7294	4706	7489	2368	7870	5758	14381	5608	7998	10271	7518	10103	4357	3562	7716	8846	235581
hsa-miR-23b-3p	18150	19736	10729	8462	8532	6254	16642	9628	6482	15295	2538	946	3954	5061	10685	5254	7319	14310	22307	6643	198927
hsa-miR-146a-5p	6434	10145	33732	6559	11238	12769	12860	25145	761	12645	7947	785	2814	3685	13055	2257	2589	10857	12292	9711	198280
hsa-miR-101-3p	6648	5192	4597	4632	10613	14818	34221	14534	4167	13699	11742	5232	4638	5619	3498	6551	5628	13208	14267	9213	192717
hsa-miR-363-3p	5964	18647	22783	38589	10485	21964	10776	8837	206	5871	1633	256	1040	3427	2971	871	2634	4945	17695	1717	181311
hsa-miR-200c-3p	2643	21817	35281	68513	3298	10377	2835	3743	15	5210	1461	837	824	5152	2296	1187	1596	2123	6732	526	176466
hsa-miR-423-3p	16591	25890	17135	44853	3142	3632	3697	4487	2592	7725	2439	1692	2328	5651	4729	4116	4158	4330	9318	4606	173111
hsa-miR-29a-3p	7550	8675	10636	9286	9043	11527	25281	10820	2319	16062	1516	404	1082	2626	3002	1818	2431	12476	18024	7669	162247
hsa-miR-181c-5p	7351	10404	8678	4429	9053	7744	20815	11707	3119	15896	2903	1113	2468	2349	4389	3300	6412	12752	18984	5975	159841
hsa-miR-130a-3p	13819	9941	11474	4796	9100	6287	17406	4770	7934	7219	5130	1129	3249	2502	4763	7069	9825	7313	15294	10410	159430
hsa-miR-941	13631	21400	23599	36650	4270	6241	4128	3890	2016	4257	2034	3161	1619	5818	3132	3654	2402	2260	6630	3527	154319
hsa-miR-24-3p	14313	7519	11722	5517	12784	9658	16957	9082	2562	5134	2023	786	2205	2535	5874	2956	3598	10144	18497	9255	153121
hsa-miR-181b-5p	13280	12951	13122	13597	4347	5462	9916	4034	1961	8765	7264	4005	5767	5442	6185	5273	7376	5253	8067	8280	150347
hsa-miR-27a-3p	7678	2938	4633	3278	7548	6884	21199	12455	1944	8539	752	528	822	1433	3164	2531	3189	15813	21001	14091	140420
hsa-miR-342-3p	13117	12217	8611	5618	5241	5112	6283	5229	2270	6461	5746	2792	3764	4254	5809	13570	7526	5373	11929	5470	136392
hsa-let-7d-5p	13263	17120	11174	13231	5129	4907	5210	2395	2919	4390	4335	2078	3731	5031	4330	3189	2555	3205	7773	5769	121734
hsa-miR-501-3p	14872	13325	13036	6223	2413	3287	7567	4518	3824	6038	3399	3266	2970	2189	3002	4932	5590	4361	5177	5891	115880
hsa-miR-30a-3p	3098	3298	3404	2012	2642	4102	9271	3897	13585	10633	4700	2068	5070	3630	2521	3686	12482	7605	9449	7013	114166
hsa-miR-98-5p	5404	3953	2512	3325	7582	8149	9032	4486	5147	6181	8357	2685	5345	3476	3389	3030	4005	5321	9134	6804	107317
hsa-miR-93-5p	3757	6699	6351	13835	3960	9255	5178	3927	1189	5261	4110	2341	2307	9991	1775	2501	1640	3187	5400	2483	95147
hsa-miR-107	5200	3605	11513	5878	6987	7300	8902	2107	4599	3422	4250	1391	2208	2340	1994	3656	3506	3339	5346	6833	94376
hsa-miR-200b-3p	2816	18423	22195	3238	5807	4405	4133	7276	33	3386	1156	2	1014	622	3816	2793	1443	2350	7549	743	93200
hsa-miR-23a-3p	6709	8158	5414	5472	3984	3120	5690	4252	2409	6868	1164	1481	1396	2556	3877	3021	3010	5620	9615	8085	91901
hsa-miR-500a-3p	7502	12162	11289	10504	1924	3177	6943	3536	1538	6505	1229	948	865	1506	1669	2542	3124	4139	5226	4062	90390
hsa-miR-142-5p	5978	1168	3651	1705	3536	4544	12509	9895	712	5586	1546	403	733	1640	6288	3906	1627	9767	7167	4581	86942
hsa-miR-199a-5p	3536	2672	1454	1579	5463	3676	11778	7449	1660	12584	776	397	654	1074	1865	2472	2368	9415	10490	4767	86129
hsa-miR-140-3p	6544	4614	4268	2817	4382	2960	5907	2907	4157	4688	2417	2900	1689	2111	2164	3734	3899	4405	6599	10341	83503
hsa-miR-30c-5p	2313	1957	2872	1575	2836	2996	10372	5242	2012	9621	1111	864	1749	2882	2613	1769	4185	7785	11327	6178	82259
hsa-miR-744-5p	21063	3826	11162	25993	933	1154	1252	514	844	1585	418	1106	881	2074	1082	1173	984	1082	1248	1111	79485
hsa-miR-532-5p	2968	3928	4435	4226	3432	4625	9282	3022	1848	5790	3799	1058	2746	2218	2440	3090	4815	6026	4690	4237	78675
hsa-miR-21-3p	10787	3855	8141	7892	3230	3932	7519	7342	1376	4534	699	245	528	1336	1983	1700	1907	4818	4218	1537	77579
hsa-miR-148a-5p	539	4229	5705	15289	2074	6462	3447	3612	404	4597	2199	6573	1189	3865	1059	4737	3923	1915	3797	1479	77094
hsa-miR-196b-5p	3677	6186	5202	9087	3851	5022	7567	4922	983	6363	1490	1045	1187	3333	1925	1387	1603	3762	6124	2282	76998
hsa-miR-28-5p	3370	3681	1460	4347	3522	4144	5338	4385	1841	6075	1114	227	1269	2236	3105	1156	1814	6153	7250	1442	63929
hsa-miR-451a	2090	702	535	352	7452	3014	3015	1366	1237	15660	42	0	156	146	647	83	428	6212	8418	11652	63207
hsa-miR-30e-3p	1327	1994	1972	1740	1758	1865	3726	2389	6167	4318	3243	1748	2813	1823	2311	2744	7404	2926	5440	4089	61797
hsa-miR-150-5p	10991	1898	16412	5148	812	1391	1283	1276	536	1871	1850	686	2383	867	2367	3024	554	1815	1380	3910	60454
hsa-miR-195-5p	3075	3387	2267	1642	4692	3231	6361	4978	615	4883	612	344	568	1069	1316	920	1310	5179	10301	2677	59427
hsa-miR-199b-5p	853	782	629	841	2335	2951	10058	5741	930	11010	378	339	280	944	756	829	1138	6897	6254	3808	57753
hsa-miR-126-3p	3317	2493	3556	3116	3751	3614	5506	3773	372	4820	527	282	353	339	763	235	856	4021	7677	4839	54210
hsa-miR-125b-1-3p	10051	2449	6856	3746	2009	1375	3004	2190	1491	2171	710	375	1094	1005	1907	1404	1150	2358	3323	2253	50921
hsa-miR-769-5p	2582	1781	2898	7229	2128	3253	3389	2368	1642	3374	1520	1873	1040	2624	1429	1999	1916	2138	2887	2437	50507
hsa-miR-361-5p	4631	5306	5725	6652	1642	1673	2979	2197	844	2400	482	185	620	1602	1519	514	1569	2572	4631	1859	49602
hsa-miR-19b-3p	1722	2236	1451	2604	2305	6022	8489	1547	361	2146	3033	2791	1696	4983	807	658	705	1357	2321	1510	48744
hsa-miR-30b-5p	1211	897	3348	4333	1764	3737	4368	2517	369	4667	289	675	482	2322	948	1050	1353	3296	5447	3374	46447
hsa-miR-155-5p	4059	6159	7733	1873	1959	2010	4054	1686	170	1441	1726	102	486	1087	1439	733	463	1732	5999	823	45734
hsa-miR-29c-3p	1190	1590	1427	2494	2690	4761	6517	3428	561	4523	640	333	389	1327	493	474	417	3469	4530	1332	42585
hsa-miR-574-3p	2972	5046	5795	5689	1715	1713	3800	1278	393	3132	362	306	453	608	536	1147	711	1441	3407	895	41399
hsa-miR-151b	3068	3601	1938	7630	1768	2307	1822	1201	624	1369	681	423	525	1677	1719	1242	1457	1024	3283	1657	39016
hsa-miR-409-3p	3480	1554	1460	1289	971	980	1514	1102	1445	2137	1364	2077	1459	1464	1250	3213	3142	1829	2143	4054	37927
hsa-miR-181d	4515	2510	2012	1661	1526	964	2538	1442	888	2435	681	493	1207	993	1632	876	1182	1654	2646	1102	32957
hsa-miR-320b	8103	1502	5191	3884	851	453	809	263	918	709	682	93	419	622	805	679	593	454	830	885	28745
hsa-miR-340-5p	852	892	1036	1817	1159	1687	3540	1066	1321	1757	1392	990	1632	1024	535	1520	1397	960	2160	1202	27939
hsa-let-7d-3p	4277	2018	3935	3841	624	672	514	418	395	1137	636	614	894	1462	1186	1099	908	728	1440	1102	27900
hsa-miR-671-3p	863	2746	1429	11036	383	511	440	552	325	1116	453	1353	295	1226	704	1376	745	346	776	342	27017
hsa-miR-381-3p	671	354	481	383	590	836	2219	856	543	2832	301	502	337	334	302	447	997	1835	3136	8689	26645
hsa-miR-27b-5p	1980	1645	1113	816	992	656	2924	1388	1976	1863	542	247	390	375	750	930	2324	2255	2041	1431	26638
hsa-miR-497-5p	1785	2079	1440	1214	2016	1749	2793	1901	286	2049	361	257	307	553	551	339	373	2185	3261	754	26253
hsa-miR-345-5p	2194	1780	2602	3324	1260	1502	1719	1489	280	2098	220	80	463	623	686	301	349	1284	2201	1035	25490
hsa-miR-106b-3p	1627	1242	2094	3262	1087	1278	1177	670	720	949	804	734	493	1589	837	1538	1271	912	1429	1507	25220
hsa-miR-221-5p	2946	2191	1327	524	803	788	3941	1252	1290	2105	617	355	1214	440	564	255	1283	1401	1107	393	24796
hsa-miR-15a-5p	999	1001	754	1690	1718	1771	3286	2609	220	2873	146	0	22	286	412	125	211	1804	3288	1225	24440
hsa-miR-411-5p	1199	606	592	500	759	857	2657	1475	389	3214	262	241	210	389	490	451	801	2066	3046	3780	23984
hsa-miR-203a	554	1850	1692	1120	1179	1752	2592	1097	67	1837	949	468	282	581	1141	170	810	972	2512	976	22601
hsa-miR-148b-3p	677	1097	1353	2232	1176	1902	2343	1615	218	2758	304	120	189	608	320	359	557	1654	1888	824	22194
hsa-miR-328	4737	1637	1293	812	722	418	1265	496	723	1036	500	283	1212	903	939	766	1492	972	1173	767	22146
hsa-miR-200a-3p	449	2152	2508	380	2764	2252	1779	2314	50	1221	197	0	45	177	882	466	297	1234	2480	376	22023
hsa-miR-193b-3p	2811	2287	3202	3298	466	495	817	388	297	892	128	1	202	533	315	122	517	755	1583	1365	20474
hsa-miR-181a-2-3p	321	754	849	485	509	657	1696	794	352	1667	1177	900	852	412	538	1381	2039	885	1453	1160	18881
hsa-miR-149-5p	758	2225	2289	3033	727	736	859	391	81	1426	312	166	295	426	560	226	674	504	2597	443	18728
hsa-miR-429	279	1409	1545	233	2094	1454	2256	2253	0	995	368	0	118	115	681	294	268	994	2320	325	18001
hsa-miR-34a-5p	1580	1402	552	361	1057	837	3248	906	331	1766	808	237	340	470	267	371	255	1191	1040	346	17365
hsa-miR-484	1335	1608	1387	4420	508	683	431	745	216	1320	202	123	179	533	564	314	444	753	1138	405	17308
hsa-miR-421	1669	1851	1602	1829	1142	883	1398	597	354	722	314	0	280	536	388	202	498	667	1595	410	16937
hsa-miR-374b-5p	828	682	798	730	769	815	2015	1026	115	1268	176	0	367	522	668	354	581	1338	2868	777	16697
hsa-miR-660-5p	535	444	300	482	440	829	3244	1183	241	2186	409	253	265	458	383	281	504	2080	1328	798	16643
hsa-miR-128	1240	1177	1284	1164	660	859	721	992	229	1277	245	166	246	590	488	337	329	930	1479	2129	16542
hsa-miR-143-5p	2682	1730	1316	672	568	432	1155	664	1131	832	197	234	326	455	434	334	411	1051	1257	431	16312
hsa-miR-30c-2-3p	831	1044	1628	845	217	338	742	229	1483	678	985	200	1144	590	574	790	1737	474	677	590	15796
hsa-miR-4485	548	248	8533	2244	201	793	111	234	48	663	79	1	0	19	25	78	27	667	671	455	15645
hsa-miR-874	2306	1645	2208	2725	437	554	367	273	215	409	170	409	195	267	344	419	327	399	872	636	15177
hsa-miR-1271-5p	1580	1567	873	328	789	742	1224	459	439	723	265	106	284	320	348	390	790	566	1236	2056	15085
hsa-miR-215	9	7	2	5	103	49	39	46	0	27	37	1	78	25	13939	218	90	33	66	69	14843
hsa-miR-425-5p	605	1037	1029	3520	424	924	697	642	15	741	99	326	46	608	325	330	180	512	1006	337	13403
hsa-miR-152	938	732	454	191	611	482	2062	1167	136	1827	101	183	183	129	220	145	498	1283	1330	472	13144
hsa-miR-1468	309	2641	663	1520	301	361	316	381	517	821	349	543	257	491	624	860	534	289	699	331	12807
hsa-miR-96-5p	413	1218	1052	1855	514	1716	853	1137	0	1313	62	80	74	398	105	190	147	362	1082	209	12780
hsa-miR-99a-3p	665	639	554	1470	818	1279	1447	452	196	802	295	81	282	544	276	188	267	560	992	866	12673
hsa-miR-214-3p	2181	1446	1294	715	475	339	716	357	278	578	143	189	196	339	287	761	397	547	822	594	12654
hsa-miR-218-5p	737	293	289	189	856	1097	1568	663	94	1069	253	0	95	335	322	185	136	1039	1509	921	11650
hsa-miR-654-3p	321	379	393	373	483	535	1062	921	191	1140	92	189	193	288	277	531	510	945	1359	1339	11521
hsa-miR-15b-5p	936	1591	1272	2674	375	614	458	399	54	709	101	129	54	176	138	213	116	461	657	387	11514
hsa-miR-1307-3p	1345	1011	1365	2860	280	425	370	242	113	476	115	146	351	598	195	265	253	395	397	292	11494
hsa-miR-378c	314	289	407	217	469	404	927	378	419	328	158	88	410	350	335	373	237	461	1070	3794	11428
hsa-miR-1296	1722	971	1281	2364	326	691	426	187	124	643	82	180	143	277	176	179	194	289	586	276	11117
hsa-miR-338-3p	538	224	160	128	1647	362	535	762	109	574	18	0	25	121	218	42	84	510	3018	1093	10168
hsa-miR-9-5p	237	254	104	124	910	277	64	458	393	248	962	1055	349	357	233	846	786	207	1645	631	10140
hsa-miR-361-3p	652	971	883	900	488	580	718	446	226	527	274	135	128	599	406	300	344	441	693	407	10118
hsa-miR-365b-3p	1042	1344	463	1325	279	313	613	353	106	428	154	55	88	409	172	208	276	492	1055	695	9870
hsa-miR-365a-3p	1042	1344	463	1325	279	313	613	353	106	428	154	55	88	409	172	208	276	492	1055	695	9870
hsa-miR-1247-5p	1898	767	479	761	171	183	47	183	344	325	270	636	119	384	818	830	285	154	587	362	9603
hsa-miR-4449	17	15	114	3795	62	415	28	43	113	350	150	2340	59	1059	84	592	58	31	52	30	9407
hsa-miR-224-5p	1508	1895	798	372	850	335	619	327	147	423	42	0	88	219	487	1	160	237	759	113	9380
hsa-miR-410	695	268	204	183	230	252	759	406	319	690	67	342	156	150	282	372	648	723	1060	1310	9116
hsa-miR-31-5p	724	1212	1292	237	711	570	122	439	13	795	248	1	181	167	606	138	275	316	915	135	9097
hsa-miR-374a-5p	505	381	275	290	493	537	1348	927	31	779	83	84	95	294	176	146	169	799	1300	344	9056
hsa-miR-432-5p	1463	262	697	346	342	300	333	175	174	426	262	699	119	304	295	337	465	368	533	1143	9043
hsa-miR-3607-3p	12	10	36	14	100	255	68	42	99	205	876	2801	692	1736	194	1018	459	26	98	112	8853
hsa-miR-195-3p	722	581	629	357	216	126	207	185	728	323	444	234	618	447	634	481	480	234	448	436	8530
hsa-miR-197-3p	791	1127	896	1603	207	243	207	125	146	303	95	356	133	232	157	633	242	150	466	265	8377
hsa-miR-146b-3p	892	573	545	1013	165	268	264	218	186	531	671	255	318	298	563	731	314	188	154	97	8244
hsa-miR-194-5p	118	183	266	470	321	462	460	157	0	267	32	94	108	123	4015	105	113	146	586	117	8143
hsa-miR-136-3p	230	94	84	48	274	291	1849	647	54	1170	59	94	69	100	55	31	255	931	896	776	8007
hsa-miR-664a-3p	287	139	560	304	354	408	915	329	118	505	195	93	202	434	269	311	690	463	635	396	7607
hsa-miR-493-5p	523	168	154	42	357	470	1706	464	97	845	139	1	102	45	60	23	76	704	873	709	7558
hsa-miR-181c-3p	361	380	384	124	452	352	1143	570	92	858	34	77	126	59	200	65	262	730	913	316	7498
hsa-miR-582-3p	195	210	264	200	477	452	1455	608	346	454	267	14	189	101	112	120	313	531	647	105	7060
hsa-miR-589-5p	268	670	705	1396	189	259	213	248	151	407	209	54	172	317	196	262	298	279	456	154	6903
hsa-miR-133b	313	145	190	45	189	161	359	91	156	402	1	0	82	41	43	34	71	233	810	3457	6823
hsa-miR-301a-3p	343	131	132	120	260	276	1408	515	191	593	194	148	53	95	73	126	203	724	684	245	6514
hsa-miR-502-3p	445	497	639	546	204	240	842	311	96	511	64	0	146	64	116	114	167	516	570	298	6386
hsa-miR-20a-5p	185	460	174	798	251	820	555	467	12	421	193	228	174	570	69	122	50	269	363	133	6314
hsa-miR-30c-1-3p	610	543	892	1058	115	160	370	158	203	312	48	0	224	206	217	102	194	214	366	271	6263
hsa-miR-30d-3p	109	187	242	666	270	709	628	461	38	752	36	0	41	459	79	28	186	369	598	276	6134
hsa-miR-17-5p	167	531	392	1203	223	645	272	323	58	392	168	355	85	494	69	36	57	241	335	79	6125
hsa-miR-196a-5p	266	219	392	227	654	101	19	163	281	204	56	1	157	30	289	45	24	93	899	1795	5915
hsa-miR-409-5p	899	525	349	208	201	193	537	398	173	568	45	0	15	85	112	71	181	307	539	496	5902
hsa-miR-181a-3p	120	125	166	101	237	214	721	236	256	397	319	281	166	105	269	508	676	299	278	302	5776
hsa-miR-374a-3p	283	142	162	99	309	357	889	381	155	366	340	316	203	239	90	258	301	239	446	167	5742
hsa-miR-574-5p	1186	455	932	635	281	298	294	105	55	268	124	0	68	238	65	52	57	189	242	123	5667
hsa-miR-184	367	138	223	56	197	134	1895	229	10	386	115	84	646	26	74	0	259	383	124	273	5619
hsa-miR-1180	1189	499	372	1070	230	164	180	141	95	191	91	0	122	253	142	91	140	154	313	118	5555
hsa-miR-455-5p	266	260	276	75	445	369	1029	248	40	466	172	0	122	130	145	126	52	380	668	197	5466
hsa-miR-454-3p	354	287	204	226	351	490	950	299	64	405	54	0	95	97	99	101	125	423	590	204	5418
hsa-miR-210	166	161	381	1245	296	477	263	120	161	334	80	1	124	144	205	272	160	156	278	246	5270
hsa-miR-19a-3p	97	171	103	198	212	492	626	178	81	211	352	880	214	725	93	80	74	139	146	149	5221
hsa-miR-130b-3p	269	235	532	1101	186	371	247	141	83	164	63	121	75	275	161	82	153	146	311	366	5082
hsa-miR-29b-3p	282	173	123	195	298	327	863	325	93	510	34	106	31	120	122	99	93	379	603	273	5049
hsa-miR-342-5p	1287	301	1196	482	104	119	118	70	0	114	92	132	25	109	127	136	147	102	120	114	4895
hsa-miR-3605-5p	920	645	1181	486	76	77	135	77	86	96	141	1	23	85	99	145	125	57	153	246	4854
hsa-miR-20b-5p	133	522	373	654	218	698	412	256	13	151	188	81	130	235	36	57	108	164	391	25	4845
hsa-miR-887	621	315	426	249	283	175	631	215	140	324	49	0	42	87	85	49	145	409	351	185	4781
hsa-miR-504	627	572	343	844	86	117	150	120	85	160	128	170	60	165	158	188	252	163	292	51	4731
hsa-miR-141-5p	34	139	161	684	226	840	415	421	1	369	61	184	0	254	57	64	64	191	542	17	4724
hsa-miR-132-3p	376	487	512	739	181	176	108	117	74	319	120	79	57	406	144	179	107	131	258	130	4700
hsa-miR-26b-3p	168	331	138	369	361	315	455	240	79	443	100	0	27	274	103	114	195	282	466	192	4652
hsa-miR-223-3p	290	89	296	183	411	447	794	432	67	307	45	0	33	7	97	49	34	384	389	289	4643
hsa-miR-218-1-3p	673	486	481	436	147	131	165	176	28	278	30	165	30	34	58	57	117	303	410	255	4460
hsa-miR-339-3p	420	466	557	899	147	152	178	171	32	269	103	0	64	134	168	126	47	194	190	67	4384
hsa-miR-34c-5p	154	139	302	109	210	242	866	195	12	327	58	0	35	47	80	44	94	313	415	434	4076
hsa-miR-1307-5p	552	33	436	1051	123	335	266	149	182	195	34	0	96	22	26	1	139	209	133	67	4049
hsa-miR-629-5p	351	283	744	511	198	342	137	63	69	307	59	0	0	181	85	91	40	104	255	165	3985
hsa-miR-424-5p	80	7	28	14	137	210	1847	159	0	344	7	0	33	23	10	21	12	562	270	71	3835
hsa-miR-335-3p	115	277	141	267	207	262	358	285	27	384	115	0	25	102	119	134	199	188	485	59	3749
hsa-miR-200b-5p	127	684	597	118	135	132	105	109	0	42	99	0	55	15	295	469	298	61	331	47	3719
hsa-miR-135a-5p	11	103	120	196	532	593	395	224	0	371	137	0	0	232	43	0	29	134	422	28	3570
hsa-miR-106b-5p	137	155	132	296	153	413	441	306	74	332	67	0	68	113	33	0	48	300	321	95	3484
hsa-miR-212-5p	341	339	234	233	192	188	161	215	141	343	54	70	27	91	85	153	98	172	195	129	3461
hsa-miR-134	363	145	185	67	117	116	269	164	96	321	45	0	47	86	66	215	204	244	307	384	3441
hsa-miR-99b-3p	444	210	114	84	148	118	259	108	343	152	168	0	58	136	152	302	116	174	149	138	3373
hsa-miR-214-5p	235	209	173	102	259	152	382	215	60	352	14	0	57	58	70	83	70	370	334	162	3357
hsa-miR-1	46	89	6	0	200	209	460	208	40	192	28	0	11	38	11	28	33	232	489	735	3055
hsa-miR-139-5p	318	131	479	131	99	95	94	43	98	252	32	80	103	14	39	49	60	185	251	400	2953
hsa-miR-652-3p	378	217	492	321	116	107	169	115	13	161	7	83	16	43	61	29	17	153	180	160	2838
hsa-miR-148b-5p	70	119	127	338	131	272	373	219	47	267	39	0	2	52	71	56	9	176	293	77	2738
hsa-miR-3651	5	3	1	28	23	127	19	33	65	197	172	652	67	567	102	361	168	30	47	33	2700
hsa-miR-628-3p	336	317	366	182	155	83	118	88	63	109	14	0	25	74	84	211	37	73	192	157	2684
hsa-miR-335-5p	72	165	187	174	112	110	490	263	17	325	31	0	23	25	18	16	117	220	273	43	2681
hsa-miR-598	140	140	164	68	197	280	222	101	113	169	147	1	128	55	80	155	74	118	223	97	2672
hsa-miR-3615	171	114	108	583	47	49	46	56	94	60	69	216	54	187	115	309	141	51	38	34	2542
hsa-miR-3605-3p	124	494	72	438	47	50	41	56	74	60	83	62	69	147	151	246	135	55	95	38	2537
hsa-miR-378d	100	79	128	53	103	73	216	85	206	49	74	0	78	93	77	125	81	109	176	489	2394
hsa-miR-664a-5p	202	222	398	831	60	64	95	45	30	87	17	2	0	12	42	37	69	30	86	58	2387
hsa-miR-4454	4	0	5	4	163	301	274	86	24	165	58	77	0	639	121	41	122	98	122	72	2376
hsa-miR-449a	6	19	83	647	40	721	4	80	0	9	0	194	0	455	6	0	0	39	11	11	2325
hsa-miR-889	89	20	61	20	60	73	301	160	58	278	22	128	49	13	59	67	142	247	193	259	2299
hsa-miR-29c-5p	81	147	143	178	209	178	194	119	38	124	48	86	17	123	80	27	69	133	184	120	2298
hsa-miR-136-5p	68	16	25	19	76	109	427	184	7	364	20	0	0	95	26	0	40	381	296	105	2258
hsa-miR-425-3p	112	123	108	163	169	188	250	144	20	61	27	0	25	63	71	0	112	199	229	116	2180
hsa-miR-339-5p	162	52	416	268	91	142	143	125	13	126	34	62	72	56	24	57	87	84	59	89	2162
hsa-let-7a-3p	42	11	41	22	153	266	187	134	31	169	104	0	79	181	78	112	15	119	301	96	2141
hsa-miR-1247-3p	299	71	137	122	75	35	36	55	97	85	84	72	80	69	187	113	158	59	92	209	2135
hsa-miR-125a-3p	289	146	360	157	64	42	89	68	67	103	31	1	62	91	77	129	48	66	144	95	2129
hsa-miR-1299	212	195	510	420	137	141	57	14	74	219	17	0	0	23	4	0	0	15	47	24	2109
hsa-miR-187-3p	19	12	11	11	48	161	216	48	179	252	19	0	41	0	17	0	118	586	188	170	2096
hsa-miR-25-5p	117	170	332	1111	10	18	18	20	0	18	32	80	23	5	12	33	4	11	27	40	2081
hsa-miR-144-5p	81	27	14	14	298	86	186	72	28	439	0	0	0	23	20	0	11	303	217	252	2071
hsa-miR-16-2-3p	123	88	107	126	182	136	129	72	63	236	94	0	27	8	61	39	22	114	152	277	2056
hsa-miR-27a-5p	54	10	131	59	97	101	22	80	272	439	78	14	35	46	61	66	34	150	86	209	2044
hsa-miR-193b-5p	618	63	670	160	28	13	39	14	46	22	10	0	51	91	45	24	6	19	28	72	2019
hsa-miR-142-3p	86	32	61	34	132	149	336	216	0	197	32	75	17	28	86	92	23	267	103	18	1984
hsa-miR-486-3p	233	39	96	27	44	45	29	33	96	80	24	98	37	73	83	202	31	29	128	554	1981
hsa-miR-873-3p	95	39	55	12	47	20	279	45	346	201	163	0	188	50	110	46	72	111	46	37	1962
hsa-miR-190b	35	21	106	215	62	251	69	73	12	93	13	0	28	55	31	0	22	39	150	567	1842
hsa-miR-208b	0	0	0	0	0	9	1	2	0	182	0	0	0	0	0	0	0	45	378	1210	1827
hsa-miR-130b-5p	14	142	27	470	54	99	41	121	33	104	54	177	25	80	41	0	110	63	127	41	1823
hsa-miR-449c-5p	4	3	39	423	18	171	9	25	0	8	0	92	21	944	4	0	21	21	7	3	1813
hsa-miR-450b-5p	46	25	48	83	98	154	340	118	0	124	11	0	35	55	21	37	22	247	253	62	1779
hsa-miR-452-5p	109	165	89	42	143	71	331	112	14	135	50	0	47	35	55	0	50	99	171	37	1755
hsa-miR-193a-5p	225	181	254	111	68	82	64	41	0	94	15	0	33	40	70	168	52	71	113	46	1728
hsa-miR-338-5p	185	119	128	52	213	41	58	65	12	64	28	0	0	76	41	0	30	42	346	197	1697
hsa-miR-106a-5p	35	322	151	223	52	228	99	73	12	62	29	0	14	153	27	0	44	37	117	18	1696
hsa-miR-1301	448	258	193	226	46	33	51	59	5	62	0	0	0	19	30	0	70	40	54	67	1661
hsa-miR-1291	41	93	179	882	14	75	19	39	0	79	12	72	13	40	22	0	15	13	30	19	1657
hsa-miR-17-3p	63	60	76	208	71	133	158	141	20	158	6	0	22	64	50	45	35	126	160	54	1650
hsa-miR-10b-3p	119	143	131	114	108	107	120	98	0	70	0	0	45	32	12	40	66	86	239	108	1638
hsa-miR-532-3p	198	180	275	312	27	44	79	22	19	59	15	0	64	27	27	23	30	56	97	65	1619
hsa-miR-548k	90	108	110	227	88	151	150	104	18	113	24	0	0	51	44	26	23	73	142	29	1571
hsa-miR-877-5p	739	55	262	191	18	4	14	5	63	15	12	0	21	30	24	30	36	5	17	30	1571
hsa-miR-505-3p	133	134	163	113	74	82	144	61	10	153	40	0	14	113	11	0	8	90	121	72	1536
hsa-miR-509-3p	39	456	158	16	288	139	6	19	0	34	102	0	62	16	20	0	82	24	17	11	1489
hsa-miR-6510-3p	3	646	186	20	55	43	20	38	7	44	24	0	0	19	69	0	104	50	113	17	1458
hsa-miR-212-3p	154	104	143	137	64	53	63	53	33	85	28	0	38	63	69	99	56	87	60	68	1457
hsa-miR-485-5p	383	137	121	93	22	20	55	23	34	49	13	80	26	84	16	54	34	25	61	123	1453
hsa-miR-584-5p	163	64	162	239	90	75	59	48	28	103	29	0	0	10	48	0	14	37	104	172	1445
hsa-miR-378a-5p	52	67	32	29	93	50	120	50	13	61	80	0	64	40	13	37	34	71	184	328	1418
hsa-miR-487b	98	78	67	57	53	63	93	51	26	118	31	0	0	48	44	0	51	148	195	159	1380
hsa-miR-24-2-5p	116	77	44	55	62	74	134	61	0	85	47	92	14	17	50	35	17	77	187	129	1373
hsa-miR-324-3p	135	122	147	185	35	52	38	37	11	68	23	132	35	60	45	28	38	63	85	32	1371
hsa-miR-200a-5p	28	158	109	21	163	143	122	95	0	56	22	0	0	4	97	0	60	44	217	24	1363
hsa-miR-140-5p	41	45	42	12	101	108	164	118	0	176	37	0	0	42	31	0	10	168	189	67	1351
hsa-miR-1248	2	0	3	34	22	251	21	21	17	35	74	222	35	329	22	173	32	16	14	13	1336
hsa-let-7e-3p	111	47	83	46	49	44	92	56	43	128	18	0	46	49	49	134	90	93	118	29	1325
hsa-miR-873-5p	38	12	4	7	78	16	653	41	27	133	12	0	53	12	54	0	0	142	31	0	1313
hsa-miR-3909	156	157	103	279	37	46	63	40	48	49	21	0	23	58	46	0	0	41	62	57	1286
hsa-miR-542-3p	13	15	4	15	38	87	419	54	12	87	40	30	47	41	6	0	78	152	76	47	1261
hsa-miR-424-3p	131	73	141	240	60	64	96	20	19	54	0	0	23	38	23	0	5	120	90	44	1241
hsa-miR-324-5p	68	45	114	54	83	103	138	63	0	114	29	0	22	40	20	0	63	69	97	77	1199
hsa-miR-708-5p	71	19	38	49	72	74	175	193	0	92	0	0	0	13	69	15	16	77	144	78	1195
hsa-miR-582-5p	36	48	45	78	112	78	237	128	0	91	0	0	0	14	27	0	24	102	158	11	1189
hsa-miR-3687	2	7	62	528	20	216	15	26	0	96	0	0	11	41	3	11	0	34	28	59	1159
hsa-let-7b-3p	66	4	136	34	60	69	39	32	28	58	24	1	21	180	80	67	22	37	95	96	1149
hsa-miR-144-3p	164	18	38	1	182	67	98	38	25	92	0	0	0	9	19	0	7	135	114	142	1149
hsa-miR-379-5p	78	49	8	14	69	64	110	45	1	47	35	118	55	3	35	0	38	79	179	93	1120
hsa-miR-891a	122	250	157	36	29	14	12	19	20	42	43	0	22	50	75	34	57	26	77	35	1120
hsa-miR-369-5p	65	25	23	29	37	53	120	55	19	89	21	111	0	72	50	43	7	92	120	85	1116
hsa-miR-370	224	79	136	64	39	53	54	47	8	36	0	0	18	36	22	32	35	71	85	70	1109
hsa-miR-499a-5p	10	6	8	0	19	33	44	9	0	196	0	0	0	0	0	0	11	54	219	460	1069
hsa-miR-362-5p	32	65	48	47	50	77	196	55	0	133	32	0	0	37	37	0	40	72	95	45	1061
hsa-miR-561-5p	35	35	29	44	36	63	102	102	0	76	0	187	18	12	10	26	9	47	101	112	1044
hsa-miR-628-5p	51	34	49	19	72	68	134	79	37	63	0	0	0	23	27	0	29	67	180	77	1009
hsa-miR-455-3p	80	123	82	39	64	71	86	42	0	53	24	0	45	12	14	0	59	48	140	25	1007
hsa-miR-22-5p	85	32	24	45	67	74	122	56	0	111	12	0	0	36	33	0	6	116	100	85	1004
hsa-miR-100-3p	59	15	14	3	41	40	184	76	22	108	32	0	41	15	23	48	60	69	94	57	1001
hsa-miR-150-3p	289	20	172	98	14	14	29	18	0	33	24	0	0	15	59	115	11	23	23	23	980
hsa-miR-450a-5p	39	26	21	25	39	81	206	72	16	92	0	0	0	30	8	0	28	134	114	39	970
hsa-miR-3653	2	11	31	162	24	100	14	13	7	52	58	71	26	180	29	77	41	18	39	10	965
hsa-miR-153	16	20	82	119	31	153	57	79	0	126	0	93	10	32	3	0	14	46	79	3	963
hsa-miR-331-5p	161	64	128	97	67	54	59	40	24	30	15	0	0	48	10	0	15	37	84	28	961
hsa-miR-127-5p	27	6	12	8	32	39	116	27	58	101	27	90	24	12	14	25	52	79	95	115	959
hsa-miR-2110	217	76	165	264	20	25	15	7	5	28	8	0	0	0	12	42	6	17	34	17	958
hsa-miR-1275	44	3	15	446	0	33	1	11	0	3	10	115	0	197	24	40	10	1	3	0	956
hsa-miR-4677-3p	41	28	26	137	24	40	79	41	37	47	67	0	37	42	32	27	101	32	67	34	939
hsa-miR-132-5p	102	66	82	89	46	52	85	60	45	121	0	0	0	7	12	0	26	69	57	20	939
hsa-miR-493-3p	50	31	41	47	26	57	94	52	14	153	0	0	16	7	24	0	38	98	106	82	936
hsa-miR-185-5p	66	40	55	30	128	77	99	37	29	75	15	0	0	9	23	22	11	61	67	77	921
hsa-miR-3613-5p	53	146	25	87	40	71	60	50	13	32	64	0	10	51	19	28	7	37	90	30	913
hsa-miR-577	64	38	39	13	124	33	25	100	0	34	0	0	15	0	135	40	8	41	104	93	906
hsa-miR-615-3p	41	70	31	432	8	11	2	50	22	16	0	145	0	14	0	0	0	12	26	24	904
hsa-miR-374b-3p	38	40	22	41	80	101	152	44	9	50	36	0	22	20	19	0	9	56	108	31	878
hsa-miR-190a	12	20	7	10	25	92	76	23	25	49	15	177	93	63	8	32	28	41	37	36	869
hsa-miR-330-5p	46	33	57	21	73	59	119	64	0	90	0	0	12	20	19	53	14	90	73	10	853
hsa-miR-320c	167	57	180	141	27	23	28	9	13	25	0	0	1	10	20	53	12	22	26	20	834
hsa-miR-92a-1-5p	29	28	71	399	8	38	6	12	0	42	19	103	0	29	5	0	12	9	21	0	831
hsa-miR-382-5p	47	10	31	26	55	35	78	37	14	98	13	0	0	9	3	28	33	107	103	101	828
hsa-miR-32-5p	22	5	29	41	62	142	84	107	1	83	17	0	0	28	2	0	10	54	110	29	826
hsa-miR-454-5p	27	8	3	37	23	30	65	55	70	47	5	94	0	20	59	117	12	67	36	47	822
hsa-miR-340-3p	27	42	22	59	27	43	48	63	15	114	13	92	6	22	12	0	23	71	94	21	814
hsa-miR-1262	78	99	124	107	24	17	20	19	60	23	0	95	0	0	19	12	32	17	23	37	806
hsa-miR-211-5p	0	4	6	7	1	7	4	0	0	3	755	0	5	0	0	0	0	1	2	2	797
hsa-miR-95	114	26	44	31	30	28	24	26	14	49	0	0	0	0	0	0	6	22	91	268	773
hsa-miR-4286	95	2	41	49	8	55	12	12	22	16	12	76	0	241	7	43	54	10	5	7	767
hsa-miR-550a-5p	150	87	59	161	12	20	31	15	4	37	16	0	0	18	12	0	2	27	38	35	724
hsa-miR-101-5p	32	15	13	18	45	63	128	55	0	87	10	0	0	19	14	0	0	71	103	46	719
hsa-miR-490-3p	0	0	10	2	7	47	275	12	56	104	0	0	35	7	13	0	0	109	19	14	710
hsa-miR-331-3p	100	8	54	77	15	28	44	25	9	16	13	0	0	26	22	58	46	69	57	41	708
hsa-miR-654-5p	179	49	57	57	18	14	25	19	10	46	12	0	17	27	3	32	0	13	38	80	696
hsa-miR-1287	46	41	66	97	49	70	76	28	0	27	8	0	1	11	6	34	0	50	59	26	695
hsa-miR-23b-5p	148	39	88	67	18	4	22	16	59	32	0	0	28	5	16	76	21	20	19	8	686
hsa-miR-6511b-3p	147	68	74	55	13	8	17	7	11	27	26	0	74	18	24	0	33	28	37	10	677
hsa-miR-625-5p	62	71	47	111	23	34	47	25	5	29	31	0	36	21	5	0	16	31	62	16	672
hsa-miR-4770	4	0	0	0	36	58	98	66	135	36	6	0	20	34	9	0	13	85	36	33	669
hsa-miR-330-3p	66	40	65	39	27	40	38	19	45	33	10	0	44	0	12	56	31	38	37	14	654
hsa-miR-139-3p	123	55	76	35	19	20	12	22	40	38	5	50	0	5	4	0	20	37	70	22	653
hsa-miR-1343	78	104	42	256	5	1	2	10	11	21	15	0	0	29	20	32	9	3	9	5	652
hsa-miR-7-5p	2	67	0	5	99	145	52	41	0	28	14	0	19	106	8	0	0	15	44	5	650
hsa-miR-383	88	25	64	20	32	19	134	20	0	16	0	0	0	9	9	0	21	51	56	85	649
hsa-miR-625-3p	24	2	12	15	19	14	8	16	10	24	99	0	24	58	80	116	55	17	13	32	638
hsa-miR-6511a-3p	92	53	51	46	12	12	24	20	50	29	40	0	15	0	21	55	46	18	31	9	624
hsa-miR-1255a	10	26	14	80	12	33	11	7	11	19	0	223	0	15	15	24	12	7	25	54	598
hsa-miR-93-3p	20	68	49	162	15	17	4	5	0	30	0	74	19	49	16	22	0	7	30	6	593
hsa-miR-641	51	38	28	36	31	29	126	40	0	25	14	0	9	4	3	0	22	39	61	29	585
hsa-miR-299-3p	25	14	11	2	29	25	101	27	0	66	0	0	0	13	2	0	20	49	69	127	580
hsa-miR-3158-3p	47	30	25	81	29	53	35	21	10	32	0	0	8	15	21	0	28	30	50	61	576
hsa-let-7i-3p	76	9	45	15	50	57	72	36	0	23	31	0	2	0	16	0	10	42	66	20	570
hsa-miR-6716-3p	48	44	4	24	12	10	27	30	17	18	18	75	0	25	15	95	21	19	37	14	553
hsa-miR-24-1-5p	58	39	30	2	36	26	78	40	6	31	0	0	0	14	14	0	0	53	83	14	524
hsa-miR-191-3p	24	44	46	172	16	25	24	24	11	22	0	0	24	11	2	21	0	12	30	15	523
hsa-miR-4461	22	10	311	50	7	21	9	4	0	29	0	0	0	0	11	0	15	7	12	15	523
hsa-miR-3912	33	21	22	15	37	41	97	35	0	31	23	0	0	19	5	0	33	29	51	30	522
hsa-miR-744-3p	29	36	18	55	22	48	39	26	0	44	0	83	9	0	12	0	8	17	51	18	515
hsa-miR-590-3p	12	10	31	11	40	41	92	42	0	35	0	82	19	27	1	0	6	23	29	12	513
hsa-miR-6724-5p	14	21	52	204	7	30	4	9	0	5	15	66	14	31	14	0	0	10	12	0	508
hsa-miR-659-5p	17	34	22	28	30	31	31	19	22	31	8	0	28	45	26	0	29	11	64	25	501
hsa-miR-4786-5p	51	56	33	17	14	10	28	13	49	27	49	0	0	9	7	0	39	34	38	23	497
hsa-miR-431-3p	68	17	15	14	28	22	28	12	45	52	16	0	0	0	8	0	8	36	31	94	494
hsa-miR-708-3p	41	11	2	21	17	10	50	49	0	32	19	0	0	17	11	27	22	14	86	65	494
hsa-miR-365b-5p	112	34	47	140	3	4	13	11	0	16	10	0	28	23	11	0	12	6	12	10	492
hsa-miR-320d	99	47	93	70	12	10	18	6	12	12	0	0	0	0	16	33	12	15	17	18	490
hsa-miR-548o-3p	21	33	37	95	27	48	42	30	0	42	0	0	0	0	11	0	0	33	41	25	485
hsa-miR-376c-3p	9	10	13	6	22	15	104	38	0	67	0	0	0	0	7	0	0	45	90	55	481
hsa-miR-29b-2-5p	33	41	41	46	26	24	15	7	8	23	0	0	0	15	13	56	0	31	42	17	438
hsa-miR-206	0	0	0	0	0	9	0	0	0	38	0	0	0	0	0	0	0	4	96	286	433
hsa-miR-224-3p	105	78	15	20	44	17	34	20	0	11	0	0	0	8	14	0	9	22	31	4	432
hsa-miR-3913-5p	23	13	10	27	10	30	36	19	30	47	17	0	34	12	12	39	28	5	25	9	426
hsa-miR-30b-3p	25	13	36	231	7	12	14	8	0	4	0	0	14	14	9	0	3	5	12	14	421
hsa-miR-576-5p	5	18	12	34	12	19	30	19	37	32	14	0	0	46	23	0	12	24	56	15	408
hsa-miR-1285-3p	51	19	40	48	17	16	16	7	0	36	0	0	0	30	23	0	16	27	31	30	407
hsa-miR-7-1-3p	11	11	14	30	33	44	46	37	0	53	0	0	0	0	12	0	6	24	72	9	402
hsa-miR-10a-3p	43	20	14	41	39	16	32	23	0	21	0	0	0	3	20	32	8	19	39	30	400
hsa-miR-138-5p	63	11	3	14	91	9	6	30	0	12	0	0	0	9	5	1	5	20	94	26	399
hsa-miR-219-1-3p	21	59	32	44	9	11	9	6	25	9	0	0	0	16	51	44	42	5	12	0	395
hsa-miR-3609	2	39	68	6	10	70	0	2	0	17	8	0	15	55	4	76	10	2	4	3	391
hsa-miR-1298	16	32	8	0	80	6	12	21	0	3	0	0	0	0	79	47	55	13	15	0	387
hsa-miR-1270	96	124	26	54	4	8	7	0	11	10	0	0	17	0	0	0	0	3	8	9	377
hsa-miR-183-3p	19	42	45	172	3	15	5	11	0	11	0	2	0	19	0	0	0	4	22	6	376
hsa-miR-5683	27	6	0	1	24	9	24	28	17	51	3	0	0	0	6	0	26	67	15	69	373
hsa-miR-193a-3p	23	5	9	21	18	31	62	10	17	51	0	0	0	16	0	0	11	32	58	8	372
hsa-miR-2277-5p	55	33	35	17	18	20	30	15	0	28	20	0	0	25	6	0	28	14	18	8	370
hsa-miR-433	63	31	34	20	14	11	11	17	7	19	0	0	0	9	3	56	9	16	32	18	370
hsa-miR-3065-3p	16	49	67	41	21	33	18	12	0	29	8	0	0	11	14	0	0	10	37	0	366
hsa-miR-301b	18	3	9	23	11	38	52	55	0	39	0	0	0	5	3	21	0	41	34	8	360
hsa-miR-3943	16	16	53	4	12	12	73	6	0	15	0	96	12	0	0	0	0	18	24	0	357
hsa-miR-3622a-5p	57	16	29	26	31	7	13	7	1	21	0	0	20	11	16	0	5	9	56	25	350
hsa-miR-1304-3p	90	176	0	0	6	16	0	0	0	1	14	0	10	11	11	0	1	2	4	0	342
hsa-miR-223-5p	31	17	33	27	11	9	29	14	35	27	18	0	0	9	10	13	7	16	11	24	341
hsa-miR-3938	9	41	29	10	15	13	3	10	0	14	0	101	18	8	19	0	9	4	31	3	337
hsa-miR-185-3p	46	22	56	73	12	6	15	9	0	9	6	0	23	0	21	0	13	3	7	11	332
hsa-miR-937-3p	26	20	18	76	2	3	2	4	31	5	7	80	1	0	25	0	21	1	4	3	329
hsa-miR-766-3p	40	56	32	63	7	16	9	9	0	10	9	0	19	8	3	0	0	14	21	11	327
hsa-miR-3127-5p	51	7	44	54	10	8	10	6	26	8	13	0	23	5	18	0	23	7	3	5	321
hsa-miR-539-3p	17	1	4	0	3	9	37	12	0	44	0	0	39	0	3	39	10	50	39	11	318
hsa-miR-33b-5p	20	1	6	43	24	60	57	30	0	5	0	0	0	28	3	0	5	7	13	5	307
hsa-miR-944	0	20	21	0	11	22	48	12	0	23	0	0	10	0	22	0	19	5	30	60	303
hsa-miR-377-5p	40	14	26	5	18	11	20	6	12	33	21	0	0	0	8	0	0	28	31	25	298
hsa-miR-377-3p	8	10	15	0	17	13	52	35	0	23	0	0	0	8	0	0	12	37	40	27	297
hsa-miR-129-5p	64	36	7	0	29	19	4	9	0	8	0	0	0	14	10	0	0	11	45	39	295
hsa-miR-651	8	6	20	1	32	37	26	12	0	22	17	0	0	56	0	0	5	15	22	7	286
hsa-miR-4746-5p	4	16	14	96	12	5	3	4	6	9	14	0	14	33	13	0	27	4	7	5	286
hsa-miR-511	34	26	4	32	18	15	4	12	23	27	13	0	23	0	30	0	0	9	9	2	281
hsa-miR-1306-5p	29	23	42	19	7	7	9	2	59	6	13	0	0	1	5	0	31	7	12	1	273
hsa-miR-758-3p	27	3	19	9	12	18	43	19	0	28	0	0	0	16	9	0	9	19	22	20	273
hsa-miR-1268a	46	16	36	41	1	3	2	3	0	6	0	0	19	81	0	0	9	2	7	0	272
hsa-miR-1268b	46	16	36	41	1	3	2	3	0	6	0	0	19	81	0	0	9	2	7	0	272
hsa-miR-34b-5p	10	12	14	1	12	22	64	14	0	17	26	0	0	0	7	0	14	25	14	14	266
hsa-miR-6507-5p	63	9	24	3	5	4	23	7	31	22	0	0	0	0	4	0	9	23	16	23	266
hsa-miR-500a-5p	36	23	11	13	15	14	33	10	13	17	0	0	0	0	0	0	12	24	20	24	265
hsa-miR-500b	36	23	7	13	15	14	33	8	13	17	0	0	0	0	0	0	12	24	20	24	259
hsa-miR-323b-3p	44	10	10	0	7	0	14	3	27	12	0	0	29	0	0	26	11	10	36	15	254
hsa-miR-33a-5p	21	9	24	12	9	39	41	16	4	18	0	0	0	19	0	0	0	21	18	1	252
hsa-miR-940	94	2	38	63	4	3	9	10	0	5	6	0	0	0	0	0	0	12	4	0	250
hsa-miR-5680	1	19	16	23	19	3	19	15	13	16	0	0	17	0	19	0	23	18	22	1	244
hsa-miR-369-3p	5	1	0	2	12	17	40	35	0	33	0	0	0	6	7	0	0	22	42	18	240
hsa-miR-337-3p	3	1	0	7	15	18	12	6	0	21	0	0	0	0	5	38	15	21	20	56	238
hsa-miR-154-5p	11	9	9	2	21	32	65	10	0	35	13	0	0	0	0	0	0	25	0	5	237
hsa-miR-4728-3p	48	35	25	21	7	3	5	6	9	5	0	0	19	0	9	0	17	14	10	4	237
hsa-miR-3613-3p	21	18	16	27	6	4	12	5	0	9	11	0	18	0	13	1	10	7	26	33	237
hsa-miR-2355-5p	19	3	13	13	18	17	51	8	0	7	0	0	0	11	2	0	11	27	28	9	237
hsa-miR-3690	23	26	43	67	9	12	11	12	0	11	17	0	0	0	0	0	0	2	2	0	235
hsa-miR-323a-3p	9	9	15	7	31	17	15	6	0	13	7	0	0	0	7	0	20	15	50	14	235
hsa-miR-664b-3p	29	7	53	13	12	9	11	11	0	8	0	0	38	3	3	0	12	12	13	0	234
hsa-miR-664b-5p	33	6	56	43	7	11	14	2	0	2	27	0	0	6	0	0	14	4	6	1	232
hsa-miR-489	10	4	0	6	6	1	34	15	0	28	0	0	0	0	0	0	7	20	14	87	232
hsa-miR-760	88	10	29	15	15	4	12	5	0	12	16	0	0	0	0	0	8	9	9	0	232
hsa-miR-541-3p	47	6	10	10	4	5	1	6	0	7	11	0	0	0	2	39	31	5	16	31	231
hsa-miR-337-5p	20	6	2	4	11	14	24	16	0	14	0	0	0	0	0	0	0	28	45	47	231
hsa-miR-4662a-5p	2	13	5	3	8	13	4	14	0	15	0	0	0	0	8	0	1	18	60	67	231
hsa-miR-4781-3p	5	1	9	17	1	3	8	14	0	17	0	0	18	26	2	83	14	2	2	9	231
hsa-miR-543	14	27	9	1	4	6	8	8	0	18	41	0	0	8	22	0	0	24	22	14	226
hsa-miR-15b-3p	32	0	18	6	27	17	29	12	4	15	0	0	0	0	1	0	0	23	33	3	220
hsa-miR-365a-5p	84	8	11	23	5	8	13	5	0	12	0	0	0	20	11	0	0	9	3	7	219
hsa-miR-452-3p	15	10	11	7	19	13	48	19	0	12	0	0	0	0	0	0	0	30	34	1	219
hsa-miR-296-3p	30	5	51	78	2	12	0	3	0	5	11	0	0	0	0	0	6	10	4	0	217
hsa-miR-20b-3p	13	16	24	14	11	15	12	5	0	5	0	0	27	8	0	0	37	7	18	3	215
hsa-miR-675-3p	28	0	10	1	6	4	17	2	0	28	0	0	0	0	0	38	9	32	13	25	213
hsa-miR-592	22	15	7	0	9	33	15	9	0	1	32	0	0	0	0	36	0	6	21	3	209
hsa-miR-92b-5p	133	4	15	9	3	1	4	4	0	3	0	0	0	12	5	0	0	5	7	1	206
hsa-miR-671-5p	20	39	11	23	4	7	32	9	0	15	0	0	0	4	2	0	10	14	15	0	205
hsa-miR-1303	38	21	18	19	6	8	8	7	6	8	0	0	0	6	11	0	4	2	23	19	204
hsa-miR-6514-5p	27	10	22	10	1	6	4	0	12	7	12	0	0	23	13	28	8	2	3	15	203
hsa-miR-6503-5p	26	11	6	6	17	11	30	10	0	7	0	0	0	0	8	0	19	9	20	22	202
hsa-miR-548b-5p	19	16	18	4	15	16	17	9	0	17	16	0	0	0	3	24	0	8	13	6	201
hsa-miR-4326	13	31	2	30	20	11	9	5	0	5	13	0	0	28	0	0	0	0	23	10	200
hsa-miR-3200-3p	8	10	12	13	16	15	15	8	0	10	15	0	22	7	12	0	0	15	15	7	200
hsa-miR-4775	12	8	3	4	5	20	24	21	0	19	0	0	0	6	0	0	12	22	43	0	199
hsa-miR-326	21	18	16	24	10	6	15	5	0	7	0	0	0	7	9	24	8	8	15	6	199
hsa-miR-653	5	0	0	0	4	3	20	21	0	8	13	0	0	0	3	28	13	14	19	47	198
hsa-miR-3940-3p	19	11	7	6	8	4	5	7	13	7	0	0	0	83	3	0	6	5	11	2	197
hsa-miR-3620-5p	24	5	32	41	11	5	1	4	0	4	0	0	0	0	0	39	18	4	1	7	196
hsa-miR-1294	26	16	26	20	7	3	10	9	17	11	12	0	0	0	3	0	9	5	6	15	195
hsa-miR-4482-3p	10	4	3	7	1	1	1	1	16	2	0	77	0	8	15	0	0	16	15	18	195
hsa-miR-3065-5p	10	31	45	31	14	16	12	1	0	11	0	0	0	0	0	0	0	5	17	0	193
hsa-miR-4446-3p	8	9	45	14	5	2	2	2	0	0	0	0	0	39	7	49	1	0	4	3	190
hsa-miR-5588-5p	9	21	64	35	1	5	2	0	0	25	13	0	0	5	0	0	0	3	6	0	189
hsa-miR-18a-5p	4	7	17	19	8	19	26	21	0	29	4	0	0	4	3	0	0	11	8	8	188
hsa-miR-6515-5p	29	11	34	90	4	2	3	0	0	2	0	0	0	0	0	0	0	2	2	7	186
hsa-miR-769-3p	21	3	9	11	12	7	19	8	9	13	0	0	0	0	0	29	0	13	19	10	183
hsa-miR-550a-3p	6	8	8	10	12	12	16	5	0	10	0	0	0	35	0	0	4	15	32	4	177
hsa-miR-1269a	0	2	3	12	0	1	0	1	0	5	47	72	0	0	8	0	0	5	5	12	173
hsa-miR-589-3p	18	17	18	27	8	3	11	5	8	5	0	0	0	10	14	0	8	8	9	4	173
hsa-miR-542-5p	11	6	16	17	15	9	31	2	0	11	0	0	0	9	0	0	9	18	18	0	172
hsa-miR-5010-5p	82	1	32	43	1	1	3	0	0	0	0	0	0	0	7	0	0	1	0	0	171
hsa-miR-34a-3p	14	1	14	0	10	4	30	13	0	21	0	0	13	0	0	0	9	18	22	1	170
hsa-miR-676-3p	2	12	11	13	15	12	14	2	0	16	13	0	0	14	4	0	0	7	19	16	170
hsa-miR-382-3p	2	1	4	3	7	8	32	17	0	21	0	0	16	5	0	0	4	19	17	14	170
hsa-miR-18a-3p	4	15	8	29	3	8	1	4	0	24	0	0	24	13	3	0	8	3	8	11	166
hsa-miR-585	19	8	20	19	19	8	41	2	0	5	0	0	0	0	0	0	0	6	3	16	166
hsa-miR-616-5p	6	10	4	16	13	10	9	11	14	15	0	0	0	26	9	0	0	6	14	3	166
hsa-miR-2467-5p	29	2	6	5	6	8	20	13	0	2	5	0	5	0	8	0	9	21	13	14	166
hsa-miR-548e	8	13	5	13	7	10	21	12	0	26	0	0	0	0	4	0	0	7	32	8	166
hsa-miR-222-5p	6	16	4	2	7	10	17	6	27	9	8	0	17	0	15	0	0	7	12	0	163
hsa-miR-487a	10	5	5	3	1	4	10	6	0	13	8	0	0	7	1	36	0	20	25	8	162
hsa-miR-656	1	0	0	0	11	17	26	8	0	20	0	0	0	0	6	0	8	18	35	11	161
hsa-miR-5091	8	25	6	15	1	8	4	9	10	10	0	0	0	22	0	0	6	11	15	11	161
hsa-miR-5096	0	4	21	37	6	28	9	3	0	5	0	0	0	17	3	0	0	5	16	6	160
hsa-miR-3617-5p	35	2	18	3	8	9	63	8	0	1	0	0	0	0	0	0	0	4	9	0	160
hsa-miR-296-5p	7	8	28	29	5	5	8	3	0	7	0	0	0	0	8	0	8	18	6	19	159
hsa-miR-548o-5p	10	11	6	23	19	14	20	8	0	6	0	0	0	0	14	0	5	6	17	0	159
hsa-miR-548c-5p	10	11	6	23	19	14	20	8	0	6	0	0	0	0	14	0	5	6	17	0	159
hsa-let-7f-1-3p	11	0	12	2	6	11	8	6	0	16	0	0	30	12	21	0	0	5	9	7	156
hsa-miR-29a-5p	7	6	6	0	11	16	21	7	0	15	19	0	0	0	4	0	10	10	12	11	155
hsa-let-7g-3p	8	0	8	7	10	25	20	2	0	6	0	0	21	0	0	0	14	14	9	10	154
hsa-miR-92a-2-5p	6	2	41	86	0	0	0	0	0	0	8	0	0	10	0	0	0	0	0	0	153
hsa-miR-431-5p	26	4	0	4	7	4	12	4	9	23	0	0	0	3	8	0	0	12	11	25	152
hsa-miR-3648	4	10	0	99	4	15	0	5	0	3	0	0	0	9	0	0	0	0	0	1	150
hsa-miR-548am-5p	10	11	5	18	18	13	21	8	0	6	0	0	0	0	14	0	5	6	14	0	149
hsa-let-7f-2-3p	0	0	0	0	12	14	25	10	12	4	0	0	0	39	0	0	0	9	8	16	149
hsa-miR-548i	11	20	14	13	10	11	15	6	0	6	0	0	0	2	0	0	0	6	15	17	146
hsa-miR-4757-3p	4	9	8	10	3	0	7	1	0	13	0	0	0	11	0	51	5	4	11	7	144
hsa-miR-147b	6	2	28	10	5	47	5	12	0	3	0	0	0	1	5	0	0	11	1	6	142
hsa-miR-5696	6	3	3	23	1	17	10	5	11	5	0	0	0	34	5	0	0	4	7	8	142
hsa-miR-3126-5p	45	24	15	7	2	5	3	1	11	6	0	0	0	6	5	0	5	1	4	0	140
hsa-miR-4645-3p	8	3	10	6	11	6	14	13	0	5	17	0	18	0	0	0	10	9	4	6	140
hsa-miR-329	7	0	1	6	3	2	23	3	0	7	0	0	0	2	9	0	17	6	23	31	140
hsa-miR-508-3p	0	7	2	0	18	28	0	4	0	7	33	0	0	0	0	0	26	7	4	3	139
hsa-miR-6500-3p	25	10	0	5	14	4	1	18	0	6	7	0	0	0	0	0	3	9	25	11	138
hsa-miR-362-3p	10	0	0	0	4	15	44	11	0	24	0	0	0	0	0	0	0	16	9	5	138
hsa-miR-485-3p	9	12	18	6	3	1	3	7	0	21	0	0	13	9	4	0	8	6	10	8	138
hsa-miR-1266	15	9	13	10	4	8	0	7	0	6	0	0	16	10	6	0	12	4	3	15	138
hsa-miR-1538	16	17	10	29	5	1	6	0	9	2	0	0	0	12	28	0	0	0	0	3	138
hsa-miR-495-3p	7	2	0	0	5	4	19	0	0	12	0	0	0	12	11	0	19	6	29	12	138
hsa-miR-2116-3p	15	19	0	22	3	3	1	11	0	5	0	0	0	12	1	32	0	3	9	0	136
hsa-miR-3074-5p	5	8	9	47	1	15	2	9	0	12	0	0	0	0	0	0	7	2	14	4	135
hsa-miR-371b-5p	11	8	31	22	3	4	2	5	0	1	0	0	0	5	0	30	0	2	3	8	135
hsa-miR-548au-5p	6	6	7	18	16	13	17	9	0	6	0	0	0	0	14	0	0	4	15	4	135
hsa-miR-5000-3p	5	5	11	1	13	8	17	10	9	21	0	0	0	0	14	0	0	5	6	10	135
hsa-miR-4787-3p	55	8	53	0	0	0	2	1	0	1	0	0	0	0	0	0	0	0	7	7	134
hsa-miR-483-3p	24	10	4	4	7	4	6	4	0	10	0	0	17	0	0	0	31	0	2	8	131
hsa-miR-548q	10	18	10	13	1	4	8	3	0	6	0	0	0	13	2	21	0	0	8	12	129
hsa-miR-3679-5p	38	7	39	15	2	5	2	2	0	3	0	0	0	2	5	0	0	6	1	2	129
hsa-miR-505-5p	27	14	9	31	0	3	7	4	0	0	0	0	0	13	0	0	8	0	5	8	129
hsa-miR-299-5p	17	4	2	0	7	1	9	4	0	9	0	0	0	6	0	0	11	9	21	28	128
hsa-miR-449b-5p	0	0	0	27	0	32	0	4	0	0	0	0	0	64	0	0	0	0	0	0	127
hsa-miR-4732-3p	13	9	3	13	3	8	0	0	45	3	0	0	0	0	3	0	0	0	6	20	126
hsa-miR-4435	2	1	12	0	1	4	2	1	0	5	17	78	0	0	3	0	0	0	0	0	126
hsa-miR-488-3p	1	2	0	0	4	3	60	7	0	9	0	0	0	0	0	0	0	20	8	8	122
hsa-miR-411-3p	9	1	10	2	3	7	5	2	0	12	0	0	13	0	6	0	0	3	16	32	121
hsa-miR-3161	0	0	10	68	0	6	0	0	0	4	0	0	0	0	0	28	0	0	4	0	120
hsa-miR-618	1	5	2	0	1	0	8	2	19	17	0	0	0	0	4	31	0	3	9	16	118
hsa-miR-1249	29	17	15	11	1	1	7	0	0	1	0	0	0	0	10	0	13	3	3	7	118
hsa-miR-138-1-3p	16	13	11	3	5	0	0	11	0	4	0	0	0	7	11	0	0	1	19	16	117
hsa-miR-3202	9	10	9	9	4	2	1	3	8	5	0	0	22	0	3	0	21	1	6	4	117
hsa-miR-379-3p	7	13	14	0	7	4	10	3	1	16	0	0	0	0	0	0	7	13	11	8	114
hsa-miR-6502-5p	8	4	0	5	2	2	6	6	11	3	29	0	0	0	12	0	0	7	1	18	114
hsa-miR-1273d	5	0	23	49	9	7	0	3	0	13	0	0	0	0	0	0	0	3	2	0	114
hsa-miR-1306-3p	17	14	18	15	1	10	5	6	0	7	0	0	0	15	0	0	0	2	1	2	113
hsa-miR-3173-5p	7	23	0	43	4	4	1	2	0	3	15	0	0	0	0	0	0	4	7	0	113
hsa-miR-3614-5p	12	2	14	6	0	10	2	2	0	4	16	0	0	5	8	0	25	1	3	3	113
hsa-miR-494	4	5	15	2	9	5	26	1	0	8	0	0	0	0	0	0	0	13	20	4	112
hsa-miR-502-5p	6	8	0	13	6	10	23	9	0	15	6	0	0	0	0	0	10	4	1	1	112
hsa-miR-1185-1-3p	20	3	7	0	6	6	13	5	0	15	0	0	0	0	5	0	0	6	6	20	112
hsa-miR-491-5p	7	3	16	24	0	6	12	3	0	8	0	0	7	0	0	0	17	1	7	0	111
hsa-miR-6509-5p	15	2	15	0	1	3	0	0	0	3	0	0	0	4	5	43	13	0	3	4	111
hsa-miR-767-5p	6	8	5	2	13	5	0	3	0	4	13	0	0	10	15	0	18	3	3	0	108
hsa-miR-6503-3p	2	3	9	2	6	8	4	3	0	3	0	0	0	0	6	35	8	5	7	6	107
hsa-miR-373-3p	2	3	29	19	20	2	5	5	0	17	0	0	0	0	0	0	0	1	3	0	106
hsa-miR-4800-3p	0	12	9	8	3	6	0	3	0	1	30	0	0	0	20	0	0	1	3	9	105
hsa-miR-576-3p	0	1	2	12	8	7	11	3	0	11	10	0	0	0	0	36	0	1	2	0	104
hsa-miR-1276	3	11	29	31	5	4	5	4	0	2	0	0	0	0	6	0	0	1	2	0	103
hsa-miR-4768-5p	3	2	6	4	6	0	5	6	33	4	0	0	0	0	18	0	0	4	7	5	103
hsa-miR-26a-2-3p	3	0	5	4	7	7	2	8	16	13	0	0	0	16	0	0	0	8	6	7	102
hsa-miR-548ax	1	11	14	2	3	10	7	2	0	9	0	0	0	13	0	0	0	8	11	10	101
hsa-miR-4709-5p	1	0	2	8	1	0	2	3	0	0	0	80	0	0	0	0	0	3	0	0	100
hsa-miR-627	8	1	0	0	4	5	5	7	0	1	22	0	0	14	0	0	10	1	13	7	98
hsa-miR-1277-5p	3	5	0	19	3	8	15	12	0	12	0	0	0	4	0	0	0	7	8	0	96
hsa-miR-942	1	8	3	20	6	5	3	5	0	14	0	0	0	0	6	0	0	4	15	5	95
hsa-miR-346	26	16	17	2	6	1	1	1	0	5	0	0	0	0	7	0	0	1	10	2	95
hsa-miR-205-3p	0	12	12	0	18	6	9	1	0	10	0	0	0	3	0	1	0	2	21	0	95
hsa-miR-4800-5p	0	10	61	12	0	0	1	3	0	0	0	0	0	0	0	0	0	0	2	5	94
hsa-miR-3691-5p	15	5	9	18	1	4	5	3	0	3	0	0	0	0	5	0	9	7	4	5	93
hsa-miR-135b-5p	7	2	0	0	13	24	1	10	0	13	0	0	0	0	8	0	0	6	4	3	91
hsa-miR-32-3p	0	4	5	34	3	22	6	5	1	6	0	0	0	0	2	0	0	1	2	0	91
hsa-miR-103a-2-5p	21	7	0	11	10	3	6	0	0	6	0	0	0	0	0	0	0	4	20	2	90
hsa-miR-516b-5p	0	6	4	1	7	0	2	0	20	1	0	0	29	0	0	0	7	0	6	6	89
hsa-miR-106a-3p	0	5	1	5	8	13	14	9	0	5	0	0	0	8	0	0	0	6	14	0	88
hsa-miR-188-3p	2	0	5	4	0	15	25	10	0	3	0	0	0	0	0	0	6	14	4	0	88
hsa-miR-1246	0	1	29	0	10	18	5	4	12	2	0	0	0	0	0	0	0	3	3	0	87
hsa-miR-3180-3p	50	2	5	4	1	0	3	1	11	0	0	0	0	0	1	0	0	4	1	4	87
hsa-miR-3180	50	2	5	4	1	0	3	1	11	0	0	0	0	0	1	0	0	4	1	4	87
hsa-miR-1224-5p	26	10	7	8	4	3	7	2	0	3	0	0	0	1	3	0	0	0	7	5	86
hsa-miR-6511a-5p	28	5	16	2	3	4	5	0	0	1	0	0	0	0	0	0	6	3	6	6	85
hsa-miR-935	1	3	2	3	0	0	0	1	31	3	17	0	0	0	0	0	0	7	14	3	85
hsa-miR-6511b-5p	28	5	16	2	3	4	5	0	0	1	0	0	0	0	0	0	6	3	6	6	85
hsa-miR-3652	1	7	0	62	0	0	0	0	0	0	0	0	0	0	0	13	0	0	0	0	83
hsa-miR-5706	0	8	2	18	7	26	1	2	0	4	0	0	0	0	0	0	7	2	5	0	82
hsa-miR-668	13	3	2	6	1	3	3	2	0	5	0	0	0	0	7	26	0	9	0	1	81
hsa-miR-3177-3p	10	15	11	22	1	3	0	1	0	3	0	0	0	0	5	0	0	0	5	5	81
hsa-miR-483-5p	50	2	10	0	0	2	4	4	0	2	0	0	0	0	0	0	0	1	2	3	80
hsa-miR-3664-3p	3	8	4	17	1	8	6	3	0	9	0	0	0	0	5	0	0	2	14	0	80
hsa-miR-196b-3p	4	7	9	7	2	5	9	3	0	4	0	0	0	8	0	0	8	5	5	3	79
hsa-miR-122-5p	1	2	0	13	0	2	1	0	0	0	0	0	0	0	0	0	0	0	1	59	79
hsa-miR-188-5p	8	3	3	0	3	6	16	7	0	2	0	0	0	0	0	0	7	9	7	8	79
hsa-miR-3117-3p	11	7	5	0	1	2	12	11	0	7	0	0	0	0	0	0	0	4	17	0	77
hsa-miR-548d-5p	0	4	8	17	2	9	3	5	0	4	0	0	0	0	4	0	0	10	4	6	76
hsa-miR-663b	2	13	10	21	0	6	0	1	0	2	16	0	0	0	1	0	0	0	2	0	74
hsa-miR-548az-5p	0	3	8	5	0	9	1	4	0	0	0	0	0	4	0	0	0	1	20	17	72
hsa-miR-197-5p	25	3	23	12	1	0	2	1	0	0	0	0	0	0	0	0	0	0	2	2	71
hsa-miR-9-3p	0	4	0	0	3	2	0	8	0	2	0	0	0	2	15	0	0	11	18	6	71
hsa-miR-3928	13	0	14	19	0	2	3	1	0	2	0	0	0	0	0	0	10	4	3	0	71
hsa-miR-1185-5p	5	6	12	0	0	0	6	4	0	8	0	0	0	0	0	0	0	13	6	10	70
hsa-miR-194-3p	0	4	0	1	0	2	1	0	0	1	0	0	0	1	56	0	0	0	3	0	69
hsa-miR-548ah-3p	0	4	1	4	4	7	3	0	0	12	0	0	0	0	0	0	0	9	6	19	69
hsa-miR-548h-5p	5	5	0	0	5	2	26	2	0	0	0	0	13	0	0	0	0	4	0	7	69
hsa-miR-548p	0	4	1	4	4	7	3	0	0	12	0	0	0	0	0	0	0	9	6	19	69
hsa-miR-20a-3p	0	6	0	9	3	5	12	7	0	14	0	0	0	0	0	0	0	9	3	0	68
hsa-miR-1245a	7	0	0	0	3	2	2	1	0	0	0	0	0	3	0	42	7	0	1	0	68
hsa-miR-6087	2	2	22	20	0	5	1	1	0	4	0	0	0	0	6	0	0	0	3	2	68
hsa-miR-2277-3p	2	8	18	5	3	5	2	1	0	3	0	0	0	0	16	0	0	3	1	0	67
hsa-miR-4667-5p	16	11	10	20	2	1	3	2	0	1	0	0	0	0	0	0	0	0	1	0	67
hsa-miR-29b-1-5p	13	7	0	12	2	5	1	0	0	1	0	0	20	0	3	0	0	1	2	0	67
hsa-miR-1254	29	7	6	5	0	0	2	0	0	1	0	0	0	0	1	0	11	1	4	0	67
hsa-let-7a-2-3p	1	4	0	0	6	7	4	3	21	4	0	0	0	0	2	0	0	3	8	4	67
hsa-miR-6721-5p	19	5	8	4	1	1	2	0	0	0	0	0	15	0	2	0	6	0	2	0	65
hsa-miR-501-5p	6	8	8	0	5	2	7	4	0	4	0	0	0	0	0	0	0	8	6	7	65
hsa-miR-4687-5p	6	7	11	4	1	2	0	1	0	8	13	0	0	7	3	0	0	1	1	0	65
hsa-miR-3130-5p	0	0	14	17	2	1	2	4	0	9	0	0	0	12	0	0	0	2	1	0	64
hsa-miR-124-3p	7	2	0	0	19	1	0	1	10	0	11	0	0	0	8	0	0	0	4	1	64
hsa-miR-5689	0	7	5	10	6	5	5	2	0	7	0	0	0	6	0	0	0	0	9	2	64
hsa-miR-203b-3p	4	4	4	0	8	3	11	0	0	5	9	0	0	0	9	0	0	0	6	0	63
hsa-miR-5010-3p	18	4	11	0	9	0	0	0	0	4	0	0	0	0	5	0	0	2	3	7	63
hsa-miR-5699	5	10	4	5	2	5	3	4	0	3	0	0	0	8	0	0	0	7	2	4	62
hsa-miR-3116	2	4	0	4	1	3	6	5	0	13	0	0	0	0	1	0	0	0	18	5	62
hsa-miR-2114-5p	0	0	0	0	11	6	25	5	0	8	0	0	0	0	0	0	0	4	2	0	61
hsa-miR-5691	11	11	15	0	9	2	0	4	0	1	7	0	0	0	0	0	0	0	0	1	61
hsa-miR-3130-3p	2	3	0	6	1	2	3	8	0	12	7	0	0	0	0	0	0	1	5	11	61
hsa-miR-2355-3p	4	5	15	5	3	2	2	3	0	3	0	0	0	0	0	0	9	5	4	0	60
hsa-miR-363-5p	1	8	32	10	2	1	1	1	0	1	0	0	0	0	0	0	0	0	3	0	60
hsa-miR-1226-3p	9	6	0	1	3	1	1	1	0	6	8	0	0	0	0	0	13	2	6	2	59
hsa-miR-3176	19	3	0	13	1	2	1	3	0	0	0	0	0	0	8	0	0	2	6	1	59
hsa-miR-548b-3p	0	1	0	1	2	1	7	5	13	4	0	0	0	0	0	0	0	17	8	0	59
hsa-miR-216a-5p	8	6	4	2	3	5	2	4	0	10	0	0	0	0	1	0	0	7	4	2	58
hsa-miR-374c-5p	0	0	0	0	7	4	0	5	0	9	0	0	0	0	14	0	0	5	10	4	58
hsa-miR-3622a-3p	10	12	4	0	4	0	1	1	14	1	0	0	0	0	0	0	3	0	4	3	57
hsa-miR-6504-5p	8	1	1	3	2	6	1	4	0	8	12	0	0	0	6	0	0	0	5	0	57
hsa-miR-3617-3p	11	5	5	0	4	0	6	5	0	5	0	0	0	10	4	0	0	2	0	0	57
hsa-miR-3936	11	1	23	10	6	0	0	0	0	1	0	0	0	0	0	0	0	0	0	5	57
hsa-miR-3688-3p	0	0	0	4	8	1	2	0	0	3	0	0	0	0	10	0	0	0	2	27	57
hsa-miR-4687-3p	9	1	0	7	0	0	0	0	0	0	0	0	0	0	0	36	0	3	0	1	57
hsa-miR-548ay-5p	0	4	0	11	2	7	3	3	0	3	0	0	0	0	4	0	0	9	4	6	56
hsa-miR-1273e	4	0	0	13	2	7	0	1	0	6	0	0	13	9	0	0	0	0	1	0	56
hsa-miR-660-3p	0	3	4	1	6	7	8	1	0	8	0	0	10	0	0	0	0	2	5	0	55
hsa-miR-3190-3p	4	0	0	0	1	2	2	0	0	1	15	0	0	13	0	0	16	0	1	0	55
hsa-miR-3174	2	2	1	0	1	1	5	1	10	2	0	0	13	0	8	0	0	3	2	4	55
hsa-miR-624-5p	1	5	0	9	5	4	6	4	0	9	0	0	0	0	0	0	0	3	4	4	54
hsa-miR-548w	12	4	0	0	5	2	8	6	0	3	0	0	0	0	0	0	4	1	7	2	54
hsa-miR-376a-5p	1	1	0	0	3	9	7	9	0	11	0	0	0	0	0	0	0	5	2	6	54
hsa-miR-4685-3p	13	0	7	4	0	0	2	0	0	2	0	0	0	0	0	0	4	3	4	14	53
hsa-miR-892a	6	7	6	2	2	2	0	1	0	4	0	0	0	12	0	0	0	3	8	0	53
hsa-miR-3620-3p	4	6	7	3	4	1	0	1	0	4	5	0	12	0	0	0	0	4	0	2	53
hsa-miR-2115-3p	2	4	2	27	8	1	3	1	0	1	0	0	0	0	0	0	0	0	4	0	53
hsa-miR-5002-5p	4	5	0	8	3	6	7	6	0	2	0	0	0	0	0	0	0	5	1	5	52
hsa-miR-605	4	0	0	0	0	0	5	0	0	2	0	0	0	0	0	35	0	0	4	2	52
hsa-miR-6505-5p	6	4	1	0	1	0	1	1	0	3	0	0	0	0	2	0	0	3	6	24	52
hsa-miR-4661-5p	0	4	3	12	0	6	0	1	0	1	0	0	0	0	0	0	0	3	1	21	52
hsa-miR-1228-3p	0	0	0	0	0	0	0	0	16	0	0	0	0	0	10	25	0	0	0	0	51
hsa-miR-3138	19	1	13	4	0	0	0	0	0	0	0	0	0	0	11	0	0	0	3	0	51
hsa-miR-3064-5p	16	5	5	7	5	3	2	2	0	1	0	0	0	4	0	0	0	0	0	1	51
hsa-miR-490-5p	0	0	0	5	2	1	15	0	0	0	0	0	10	0	6	0	0	11	1	0	51
hsa-miR-182-3p	0	2	0	14	2	3	1	8	0	0	0	0	0	19	0	0	0	0	2	0	51
hsa-miR-202-3p	6	4	14	17	0	2	0	0	0	3	0	0	0	0	0	0	0	0	0	4	50
hsa-miR-2114-3p	3	6	0	2	0	7	14	2	0	4	0	0	0	0	0	0	0	5	7	0	50
hsa-miR-7-2-3p	0	0	0	0	0	0	1	3	0	1	0	0	0	0	0	31	8	3	1	2	50
hsa-miR-4717-3p	3	2	13	0	11	2	4	2	0	1	0	0	4	0	4	0	0	2	0	1	49
hsa-miR-1258	1	9	2	0	1	3	15	1	0	14	0	0	0	0	0	0	0	2	1	0	49
hsa-miR-1292-5p	7	8	0	21	0	0	1	0	0	0	0	0	0	0	8	0	0	1	3	0	49
hsa-miR-33a-3p	2	0	0	5	3	8	8	7	0	5	0	0	0	0	0	0	0	6	5	0	49
hsa-miR-541-5p	7	0	0	9	0	1	1	0	0	3	16	0	0	0	0	0	0	2	3	6	48
hsa-miR-26a-1-3p	0	4	3	0	1	5	6	10	0	4	0	0	0	0	1	0	0	6	8	0	48
hsa-miR-548ag	2	0	0	0	11	1	1	1	0	4	0	0	0	15	0	0	0	1	12	0	48
hsa-miR-18b-5p	3	0	0	2	6	12	4	8	0	0	0	0	0	0	1	0	0	3	3	6	48
hsa-miR-3677-3p	4	0	0	0	7	12	6	1	0	1	0	0	0	0	0	0	14	2	0	0	47
hsa-miR-548al	2	1	2	5	1	3	6	1	0	1	0	0	0	0	0	0	0	10	11	4	47
hsa-miR-663a	0	0	6	27	3	6	1	2	0	2	0	0	0	0	0	0	0	0	0	0	47
hsa-miR-3917	9	18	0	3	4	0	1	0	0	1	0	0	0	0	0	0	7	1	1	0	45
hsa-miR-675-5p	30	0	0	0	0	1	1	0	0	2	0	0	0	0	0	0	0	2	4	5	45
hsa-miR-939-5p	3	2	8	5	4	1	1	4	0	1	0	0	0	0	0	0	0	5	6	5	45
hsa-miR-570-3p	5	4	0	0	0	3	5	4	0	4	0	0	0	9	0	0	0	3	8	0	45
hsa-miR-1911-5p	3	7	7	0	5	0	0	3	0	0	0	0	0	0	16	0	0	2	1	0	44
hsa-miR-1323	3	3	0	0	1	2	3	2	0	2	0	0	0	0	0	18	10	0	0	0	44
hsa-miR-18b-3p	11	0	9	7	0	5	1	2	0	1	0	0	0	0	6	0	0	1	1	0	44
hsa-miR-3124-5p	1	1	10	16	0	6	3	4	0	0	0	0	0	0	0	0	0	1	1	0	43
hsa-miR-885-5p	0	1	7	0	0	0	0	0	0	1	0	0	0	0	5	0	0	0	2	26	42
hsa-miR-6508-3p	1	5	0	1	1	2	4	0	0	4	10	0	0	0	3	0	0	1	2	8	42
hsa-miR-3125	4	6	5	23	2	2	0	0	0	0	0	0	0	0	0	0	0	0	0	0	42
hsa-miR-1304-5p	10	7	2	14	0	2	2	0	0	1	0	0	0	0	3	0	0	1	0	0	42
hsa-miR-3200-5p	6	3	5	1	2	0	0	0	0	3	0	0	0	15	0	0	0	0	6	0	41
hsa-miR-34b-3p	0	0	4	0	0	4	1	2	0	3	0	0	0	0	5	0	12	2	3	5	41
hsa-miR-4699-3p	0	0	0	0	0	1	3	0	0	6	0	0	18	0	3	0	0	2	0	8	41
hsa-miR-539-5p	8	8	0	0	3	4	4	2	0	3	0	0	0	0	0	0	0	4	1	4	41
hsa-miR-4647	13	7	7	11	0	0	1	0	0	0	0	0	0	0	0	0	0	1	1	0	41
hsa-miR-580	3	0	0	3	2	3	4	5	0	3	0	0	0	0	0	0	0	1	3	13	40
hsa-miR-655	0	0	0	0	2	0	6	1	0	6	0	0	0	0	0	0	0	2	7	16	40
hsa-miR-1289	4	7	10	8	0	2	1	4	0	2	0	0	0	0	0	0	0	0	1	0	39
hsa-miR-3074-3p	1	0	5	15	0	4	2	1	0	0	0	0	0	9	0	1	0	0	1	0	39
hsa-miR-129-2-3p	8	3	0	0	3	0	2	3	0	2	0	0	0	0	3	0	0	3	6	6	39
hsa-miR-496	1	0	5	0	1	2	2	2	0	4	0	0	0	0	0	0	9	5	7	0	38
hsa-miR-1910	11	12	0	4	2	1	0	0	0	6	0	0	0	0	2	0	0	0	0	0	38
hsa-miR-4705	0	0	0	0	0	4	11	1	0	12	0	0	0	0	0	0	0	2	5	3	38
hsa-miR-1260b	10	1	7	6	2	0	0	2	0	1	0	0	0	6	0	0	0	2	0	1	38
hsa-miR-1179	1	0	0	0	2	6	6	4	0	3	0	0	0	0	0	0	0	0	15	0	37
hsa-miR-4521	1	0	0	3	1	5	3	2	0	3	0	0	0	8	3	0	0	0	7	0	36
hsa-miR-301a-5p	0	1	0	0	5	0	6	2	0	0	0	0	0	5	9	0	0	2	0	6	36
hsa-miR-4707-3p	0	5	0	0	0	0	1	0	0	6	12	0	0	0	0	0	5	0	4	3	36
hsa-miR-506-3p	0	8	8	0	10	5	0	3	0	1	0	0	0	0	0	0	0	0	1	0	36
hsa-miR-34c-3p	0	3	9	0	4	1	0	0	0	6	0	0	0	0	0	0	0	1	2	10	36
hsa-miR-1255b-5p	3	0	3	13	0	1	3	0	0	0	0	0	0	6	0	0	0	0	1	5	35
hsa-miR-770-5p	0	5	0	0	2	1	7	0	0	3	0	0	0	0	9	0	0	0	4	4	35
hsa-miR-556-5p	6	1	3	11	0	2	2	2	0	0	0	0	0	0	0	0	0	2	6	0	35
hsa-miR-217	2	3	0	0	3	0	1	3	0	2	0	0	0	0	4	0	13	0	4	0	35
hsa-miR-187-5p	0	0	0	0	1	0	5	0	17	1	0	0	0	0	0	0	0	6	1	4	35
hsa-miR-2116-5p	0	0	10	1	2	0	1	4	0	1	0	0	0	7	0	0	0	2	3	3	34
hsa-miR-450a-3p	0	2	0	1	0	1	8	1	0	0	0	0	0	0	0	0	12	2	2	5	34
hsa-miR-16-1-3p	0	0	0	0	4	1	3	3	0	3	0	0	0	0	4	0	0	4	3	9	34
hsa-miR-33b-3p	0	0	2	20	0	0	0	4	0	1	0	0	0	7	0	0	0	0	0	0	34
hsa-miR-3610	2	6	3	14	2	2	0	1	0	0	0	0	0	0	0	0	2	2	0	0	34
hsa-miR-4511	0	1	0	2	0	2	2	5	0	3	0	0	0	0	5	0	8	0	0	5	33
hsa-miR-4999-5p	0	2	0	0	3	2	4	2	0	4	0	0	0	0	4	0	5	4	3	0	33
hsa-miR-4671-5p	0	0	5	4	0	0	0	0	0	1	0	0	0	16	3	0	0	0	1	2	32
hsa-miR-652-5p	7	0	6	0	0	4	6	2	0	0	0	0	0	0	0	0	0	2	5	0	32
hsa-miR-219-5p	0	0	0	2	4	6	3	12	0	3	0	0	0	0	0	0	0	1	1	0	32
hsa-miR-888-5p	3	0	1	0	1	1	6	2	0	2	0	0	0	0	0	0	0	1	4	11	32
hsa-miR-3661	8	6	0	4	1	4	1	3	0	0	0	0	0	0	0	0	0	2	2	0	31
hsa-miR-3175	25	0	4	0	1	0	0	1	0	0	0	0	0	0	0	0	0	0	0	0	31
hsa-miR-3944-5p	2	6	2	8	1	4	1	0	0	2	0	0	0	0	0	0	0	0	5	0	31
hsa-miR-616-3p	7	0	5	9	1	0	0	1	0	0	0	0	0	0	3	0	0	0	0	5	31
hsa-miR-1197	5	0	0	0	2	1	1	1	0	3	0	0	0	0	0	0	0	3	12	3	31
hsa-miR-3129-5p	8	4	0	3	1	3	3	0	0	6	0	0	0	0	0	0	0	2	0	0	30
hsa-miR-488-5p	2	0	0	0	2	1	11	0	0	3	0	0	0	0	0	0	0	2	7	2	30
hsa-miR-376b-3p	10	0	0	0	0	0	8	2	0	3	0	0	0	0	1	0	0	2	2	2	30
hsa-miR-371a-5p	6	0	8	1	3	1	0	0	0	1	0	0	0	10	0	0	0	0	0	0	30
hsa-miR-4512	0	6	12	2	0	0	4	4	0	0	0	0	0	0	0	0	0	1	1	0	30
hsa-miR-6720-3p	6	0	0	0	1	3	2	0	0	2	0	0	0	0	3	0	0	4	6	3	30
hsa-miR-3199	0	5	1	0	2	0	4	4	0	2	0	0	0	0	0	0	7	1	3	0	29
hsa-miR-3616-3p	7	0	13	4	1	0	0	2	0	0	0	0	0	0	0	0	0	1	1	0	29
hsa-miR-192-3p	0	0	0	0	0	0	3	0	0	0	0	0	0	0	16	0	0	3	7	0	29
hsa-miR-1185-2-3p	13	1	2	0	1	2	6	3	0	0	0	0	0	0	0	0	0	1	0	0	29
hsa-miR-642a-5p	0	14	0	1	4	1	1	1	0	1	0	0	0	0	0	0	0	2	4	0	29
hsa-miR-615-5p	1	0	0	8	2	0	0	2	0	3	0	0	0	6	0	0	0	1	2	3	28
hsa-miR-4797-3p	1	0	0	0	0	4	1	1	14	1	0	0	0	0	0	0	0	0	3	3	28
hsa-miR-876-5p	0	0	6	0	1	1	17	0	0	0	0	0	0	0	0	0	0	3	0	0	28
hsa-miR-4498	14	0	2	0	0	0	0	0	0	1	0	0	0	0	0	0	11	0	0	0	28
hsa-miR-3166	3	1	0	0	0	3	0	0	0	0	0	0	0	11	0	0	7	0	0	3	28
hsa-miR-6513-3p	0	0	0	3	0	0	1	4	0	0	12	0	0	0	0	0	5	2	0	1	28
hsa-miR-5587-3p	2	5	8	0	3	1	0	0	0	1	0	0	0	4	0	0	0	2	0	2	28
hsa-miR-514a-3p	0	1	0	0	5	11	1	0	0	2	0	0	0	8	0	0	0	0	0	0	28
hsa-miR-4796-3p	1	2	8	3	0	3	2	1	0	0	0	0	0	0	0	0	0	0	8	0	28
hsa-miR-6501-3p	1	6	12	1	1	0	0	1	0	0	0	0	0	0	0	0	0	1	5	0	28
hsa-miR-6513-5p	3	4	1	2	1	2	5	0	0	0	0	0	0	0	0	0	0	1	4	4	27
hsa-miR-1286	2	3	2	18	1	0	0	1	0	0	0	0	0	0	0	0	0	0	0	0	27
hsa-miR-3129-3p	9	0	0	0	0	1	6	3	0	7	0	0	0	0	0	0	0	1	0	0	27
hsa-miR-4638-3p	3	0	6	3	0	0	3	0	0	0	8	0	0	0	2	0	0	0	1	0	26
hsa-miR-6506-5p	8	1	4	0	0	2	0	0	0	2	0	0	0	0	0	0	0	0	4	5	26
hsa-miR-1285-5p	2	0	0	0	0	4	1	2	0	5	0	0	0	0	9	0	0	0	3	0	26
hsa-miR-1295a	2	8	0	2	1	4	1	2	0	3	0	0	0	0	0	0	0	3	0	0	26
hsa-miR-3126-3p	2	6	0	0	4	2	3	0	0	0	0	0	0	0	0	0	0	2	7	0	26
hsa-miR-548at-5p	3	0	10	0	4	1	0	0	0	1	0	0	0	0	0	0	0	1	6	0	26
hsa-miR-4670-3p	1	0	0	3	1	5	0	1	0	3	0	0	0	0	0	0	0	0	3	9	26
hsa-miR-3188	0	1	0	2	0	0	0	1	0	4	0	0	0	0	0	0	12	6	0	0	26
hsa-miR-4641	4	0	0	0	0	0	1	2	0	0	0	0	0	7	1	0	0	1	2	7	25
hsa-miR-3150b-3p	7	0	5	0	2	3	1	0	0	0	0	0	0	0	2	0	0	2	3	0	25
hsa-miR-3612	2	0	0	0	4	0	5	0	0	0	0	0	0	5	0	0	7	1	1	0	25
hsa-miR-629-3p	5	2	0	0	0	1	1	1	0	3	0	0	0	0	0	0	11	0	1	0	25
hsa-miR-4671-3p	2	4	6	4	0	0	2	1	0	3	0	0	0	0	0	0	0	3	0	0	25
hsa-miR-513c-5p	3	5	0	0	2	0	0	0	0	1	14	0	0	0	0	0	0	0	0	0	25
hsa-miR-3622b-3p	0	0	8	2	3	0	0	0	0	0	0	0	0	0	0	0	5	0	5	1	24
hsa-miR-1908	3	1	1	13	2	1	1	2	0	0	0	0	0	0	0	0	0	0	0	0	24
hsa-miR-3157-3p	0	10	0	4	3	0	1	0	0	2	0	0	0	0	1	0	0	0	3	0	24
hsa-miR-612	0	0	1	12	0	8	0	0	0	0	0	0	0	0	0	0	0	0	1	2	24
hsa-miR-380-3p	2	1	0	0	0	0	3	1	0	3	0	0	0	0	0	0	0	0	10	4	24
hsa-miR-622	0	0	0	16	0	1	0	2	0	1	0	0	0	0	0	0	0	0	2	2	24
hsa-miR-1322	0	1	0	16	0	3	1	0	0	1	0	0	0	0	0	0	0	1	1	0	24
hsa-miR-3155a	2	0	0	0	0	0	0	0	0	4	13	0	0	0	0	0	0	0	1	3	23
hsa-miR-4654	16	3	3	1	0	0	0	0	0	0	0	0	0	0	0	0	0	0	0	0	23
hsa-miR-5004-5p	0	1	0	1	0	0	0	0	0	0	0	0	0	0	0	20	0	1	0	0	23
hsa-miR-3152-5p	4	0	0	0	3	3	0	2	0	4	0	0	0	0	0	0	0	1	4	2	23
hsa-miR-4697-3p	4	3	0	1	0	3	1	0	0	2	0	0	0	0	0	0	0	0	5	4	23
hsa-miR-31-3p	0	0	0	0	0	3	1	0	0	0	0	0	12	2	0	0	0	1	4	0	23
hsa-miR-503-5p	1	1	0	7	0	7	5	0	0	1	0	0	0	0	0	0	0	1	0	0	23
hsa-miR-548ab	0	1	1	0	4	0	6	2	0	1	0	0	0	0	0	0	0	2	6	0	23
hsa-miR-548l	3	0	1	2	2	3	4	0	0	0	0	0	0	0	0	0	0	2	6	0	23
hsa-miR-3187-3p	15	1	0	0	1	0	0	0	0	0	0	0	0	0	0	0	0	1	4	0	22
hsa-miR-548f	0	0	0	0	1	0	0	2	0	4	0	0	0	0	0	0	10	3	0	2	22
hsa-miR-3934-5p	4	1	0	0	1	0	3	1	0	0	0	0	0	0	3	0	0	1	1	7	22
hsa-miR-200c-5p	1	0	3	1	0	5	1	0	0	0	0	0	0	0	0	0	0	4	7	0	22
hsa-miR-3681-5p	3	1	0	0	0	0	0	0	0	2	0	0	0	0	0	0	0	0	2	13	21
hsa-miR-4668-5p	3	6	2	8	0	0	0	0	0	0	0	0	0	0	0	0	0	1	0	1	21
hsa-miR-1284	2	3	3	9	0	0	2	0	0	0	0	0	0	0	0	0	0	1	1	0	21
hsa-miR-1251	0	0	0	3	7	2	1	2	0	0	0	0	0	0	0	0	0	0	1	5	21
hsa-miR-509-3-5p	0	2	0	7	5	0	0	0	0	0	0	0	0	0	0	0	7	0	0	0	21
hsa-miR-216b	4	3	3	0	0	2	0	0	0	0	0	0	0	0	3	0	0	0	6	0	21
hsa-miR-3177-5p	0	9	0	0	0	0	3	0	9	0	0	0	0	0	0	0	0	0	0	0	21
hsa-miR-548j	3	0	7	0	0	2	2	0	0	4	0	0	0	0	0	0	0	3	0	0	21
hsa-miR-4473	1	1	0	0	0	2	0	1	0	5	0	0	0	0	0	0	0	2	6	3	21
hsa-miR-129-1-3p	0	0	8	0	4	0	0	0	0	1	0	0	0	0	0	0	0	3	4	0	20
hsa-miR-98-3p	0	0	0	0	1	11	1	3	0	1	0	0	0	0	0	0	0	0	3	0	20
hsa-miR-3183	2	0	0	3	0	0	0	0	13	0	0	0	0	0	0	0	0	0	2	0	20
hsa-miR-3918	0	8	1	6	0	0	1	1	0	0	0	0	0	0	0	0	0	0	3	0	20
hsa-miR-4649-3p	9	0	4	0	0	0	1	0	0	0	0	0	0	4	0	0	0	0	2	0	20
hsa-miR-3656	6	0	0	0	2	0	2	1	0	0	0	0	0	0	0	0	0	7	2	0	20
hsa-miR-5695	0	2	0	0	0	1	4	0	0	1	0	0	0	0	0	0	0	0	7	5	20
hsa-miR-4520a-3p	0	5	0	0	0	0	0	0	0	0	0	0	0	0	5	0	10	0	0	0	20
hsa-miR-665	0	1	0	0	0	1	5	1	0	0	0	0	0	0	0	0	8	0	1	2	19
hsa-miR-19b-1-5p	6	2	0	0	0	1	1	0	0	3	0	0	0	6	0	0	0	0	0	0	19
hsa-miR-202-5p	0	0	0	0	2	3	3	1	0	3	0	0	0	0	0	0	0	4	0	3	19
hsa-miR-1252	0	1	4	4	2	3	3	0	0	0	0	0	0	0	0	0	0	2	0	0	19
hsa-miR-766-5p	5	0	2	4	2	1	0	0	0	0	0	0	0	0	0	0	0	0	0	5	19
hsa-miR-2276	0	1	0	12	1	2	0	0	0	0	0	0	0	0	1	0	0	1	1	0	19
hsa-miR-4536-5p	0	0	0	0	0	5	1	0	0	0	13	0	0	0	0	0	0	0	0	0	19
hsa-miR-4742-5p	0	4	0	0	0	2	1	1	0	1	0	0	0	0	3	0	4	2	1	0	19
hsa-miR-4745-5p	11	2	1	3	0	0	0	1	0	1	0	0	0	0	0	0	0	0	0	0	19
hsa-miR-4738-3p	0	3	2	4	3	0	0	1	0	0	0	0	0	0	0	0	6	0	0	0	19
hsa-miR-4703-3p	0	0	0	9	0	1	1	0	0	0	0	0	0	0	0	0	0	7	1	0	19
hsa-miR-3144-5p	2	0	15	0	1	1	0	0	0	0	0	0	0	0	0	0	0	0	0	0	19
hsa-miR-3163	0	5	2	4	1	0	0	1	0	0	0	0	0	0	0	0	0	1	0	5	19
hsa-miR-5009-5p	0	1	0	3	2	1	1	0	0	3	0	0	0	6	0	0	0	0	2	0	19
hsa-miR-548ak	0	5	0	0	1	3	5	2	0	0	0	0	0	0	0	0	0	1	2	0	19
hsa-miR-548ay-3p	1	1	9	4	2	0	1	1	0	0	0	0	0	0	0	0	0	0	0	0	19
hsa-miR-4742-3p	0	0	0	0	0	1	1	2	0	2	0	0	0	0	5	0	0	3	5	0	19
hsa-miR-2682-5p	0	0	2	0	3	0	0	0	0	2	0	0	0	0	0	0	3	0	5	3	18
hsa-miR-3591-5p	0	0	0	0	0	0	0	0	0	5	0	0	0	0	0	0	0	0	1	12	18
hsa-miR-376a-3p	0	0	0	0	0	2	1	2	0	2	4	0	0	0	0	0	0	3	4	0	18
hsa-miR-643	0	0	0	0	3	1	0	1	0	1	0	0	0	0	4	0	0	1	7	0	18
hsa-miR-3942-5p	0	1	0	0	3	0	0	1	0	3	0	0	0	10	0	0	0	0	0	0	18
hsa-miR-516a-5p	0	0	3	0	2	0	4	2	0	2	0	0	0	0	0	0	0	0	1	4	18
hsa-miR-550a-3-5p	4	4	0	0	0	1	3	0	0	0	0	0	0	0	4	0	0	0	2	0	18
hsa-miR-4712-3p	0	0	0	0	0	1	0	3	0	1	0	0	0	0	0	0	0	0	3	10	18
hsa-miR-548aw	0	0	0	0	0	1	3	0	0	4	0	0	0	10	0	0	0	0	0	0	18
hsa-miR-1264	3	4	0	0	3	0	0	1	0	0	0	0	0	0	5	0	0	2	0	0	18
hsa-miR-6717-5p	6	0	1	0	0	0	0	0	0	0	10	0	0	0	0	0	0	0	0	0	17
hsa-miR-520a-3p	0	0	0	0	2	0	1	0	0	0	0	0	13	0	0	0	0	0	1	0	17
hsa-miR-4753-5p	0	3	5	9	0	0	0	0	0	0	0	0	0	0	0	0	0	0	0	0	17
hsa-miR-4772-5p	0	4	0	3	0	0	2	1	0	1	0	0	0	0	5	0	0	1	0	0	17
hsa-miR-4755-3p	2	0	2	5	0	3	0	0	0	1	0	0	0	0	0	0	0	0	0	4	17
hsa-miR-137	0	0	0	0	7	1	0	1	0	0	0	0	0	0	0	0	0	4	4	0	17
hsa-miR-3614-3p	0	0	0	0	5	6	0	0	0	0	0	0	0	0	6	0	0	0	0	0	17
hsa-miR-3159	0	0	0	0	2	4	0	0	0	2	0	0	0	0	0	0	0	0	0	9	17
hsa-miR-4520b-3p	0	11	0	0	0	0	1	0	0	0	0	0	0	0	3	0	0	0	1	0	16
hsa-miR-4421	0	0	1	3	0	0	1	3	0	1	0	0	0	0	0	0	0	1	6	0	16
hsa-miR-380-5p	0	0	0	0	0	0	1	0	9	0	0	0	0	0	0	0	0	1	2	3	16
hsa-miR-4748	0	1	4	6	0	0	0	0	0	0	0	0	0	0	0	0	5	0	0	0	16
hsa-miR-3150a-5p	2	1	0	2	0	1	0	1	0	0	0	0	0	9	0	0	0	0	0	0	16
hsa-miR-548h-3p	0	0	0	3	1	0	2	2	0	3	0	0	0	0	0	0	0	2	0	3	16
hsa-miR-3197	2	2	0	2	0	0	0	0	0	0	0	0	0	10	0	0	0	0	0	0	16
hsa-miR-6723-5p	0	0	7	3	0	1	1	1	0	1	0	0	0	2	0	0	0	0	0	0	16
hsa-miR-4523	2	0	0	5	0	0	0	0	9	0	0	0	0	0	0	0	0	0	0	0	16
hsa-miR-3916	3	0	0	3	0	2	0	0	0	6	0	0	0	0	0	0	0	2	0	0	16
hsa-miR-517a-3p	0	2	0	1	1	4	0	1	0	1	0	0	0	0	0	0	0	0	4	2	16
hsa-miR-517b-3p	0	2	0	1	1	4	0	1	0	1	0	0	0	0	0	0	0	0	4	2	16
hsa-miR-1269b	0	0	0	0	0	0	0	9	0	0	0	0	0	0	0	0	7	0	0	0	16
hsa-miR-204-3p	10	0	0	0	0	0	1	0	0	3	0	0	0	0	0	0	0	2	0	0	16
hsa-miR-374c-3p	0	0	0	0	0	1	0	0	0	0	14	0	0	0	0	0	0	0	1	0	16
hsa-miR-499a-3p	0	0	0	0	0	0	1	1	0	0	0	0	0	0	0	0	0	2	0	12	16
hsa-miR-548z	0	0	0	3	1	0	2	2	0	3	0	0	0	0	0	0	0	2	0	3	16
hsa-miR-4767	6	0	0	3	3	0	0	1	0	0	0	0	0	0	1	0	0	1	0	1	16
hsa-miR-1976	0	1	0	2	0	0	0	0	0	2	0	0	0	10	0	0	0	0	0	1	16
hsa-miR-4769-5p	5	1	0	8	0	0	0	0	0	0	0	0	0	0	0	0	0	1	0	0	15
hsa-miR-371b-3p	0	0	0	0	0	0	0	0	15	0	0	0	0	0	0	0	0	0	0	0	15
hsa-miR-208a	0	0	0	0	0	0	3	0	0	0	0	0	0	0	0	0	0	0	4	8	15
hsa-miR-196a-3p	0	0	0	0	0	0	0	0	0	1	0	0	0	0	0	0	0	1	4	9	15
hsa-miR-4762-5p	0	2	0	4	0	0	0	5	0	0	0	0	0	0	0	0	0	1	1	2	15
hsa-miR-4434	0	0	0	0	1	0	4	0	8	0	0	0	0	0	0	0	0	1	1	0	15
hsa-miR-3179	0	0	13	0	0	0	0	1	0	0	0	0	0	0	0	0	0	1	0	0	15
hsa-miR-548n	1	2	1	0	3	1	2	1	0	3	0	0	0	0	0	0	0	1	0	0	15
hsa-miR-6499-5p	0	5	3	0	2	3	0	0	0	1	0	0	0	0	0	0	0	1	0	0	15
hsa-miR-676-5p	0	1	0	5	2	3	2	0	0	0	0	0	0	0	0	0	0	1	1	0	15
hsa-miR-545-5p	1	0	0	0	3	1	5	2	0	0	0	0	0	0	0	0	0	2	1	0	15
hsa-miR-105-5p	3	0	6	0	2	0	1	1	0	0	0	0	0	0	0	0	0	0	2	0	15
hsa-miR-1245b-3p	0	0	3	0	2	0	0	0	0	2	0	0	5	0	0	0	0	0	3	0	15
hsa-miR-3136-5p	0	0	0	0	1	0	8	1	0	2	0	0	0	0	0	0	0	3	0	0	15
hsa-miR-5092	0	4	3	4	0	1	0	0	0	0	0	0	0	0	0	0	0	1	1	0	14
hsa-miR-186-3p	0	2	0	0	0	3	3	0	0	1	0	0	0	0	0	0	5	0	0	0	14
hsa-miR-6715b-3p	0	0	0	9	0	3	0	0	0	2	0	0	0	0	0	0	0	0	0	0	14
hsa-miR-4664-3p	0	1	0	12	0	0	0	0	0	1	0	0	0	0	0	0	0	0	0	0	14
hsa-miR-1914-5p	0	0	0	10	0	0	1	3	0	0	0	0	0	0	0	0	0	0	0	0	14
hsa-miR-3128	0	0	0	0	1	0	5	0	0	0	0	0	0	0	0	0	0	0	0	8	14
hsa-miR-548t-5p	0	3	3	4	2	1	0	0	0	0	0	0	0	0	0	0	0	1	0	0	14
hsa-miR-3154	2	0	11	0	0	0	0	1	0	0	0	0	0	0	0	0	0	0	0	0	14
hsa-miR-432-3p	0	0	0	0	0	0	2	3	0	3	0	0	0	0	0	0	0	1	2	3	14
hsa-miR-4788	0	1	0	0	0	0	0	0	0	0	0	0	0	13	0	0	0	0	0	0	14
hsa-miR-1234-3p	0	2	1	0	0	5	1	0	0	0	0	0	0	0	3	0	0	0	2	0	14
hsa-miR-1243	0	0	0	0	6	3	1	0	0	0	0	0	0	0	0	0	0	0	4	0	14
hsa-miR-5088	5	0	6	0	0	0	0	0	0	3	0	0	0	0	0	0	0	0	0	0	14
hsa-miR-3913-3p	0	5	0	0	0	0	4	2	0	1	0	0	0	0	0	0	0	0	2	0	14
hsa-miR-5701	0	0	0	0	1	1	1	2	0	0	0	0	0	0	5	0	0	2	2	0	14
hsa-miR-934	0	0	0	0	5	1	5	0	0	1	0	0	0	0	2	0	0	0	0	0	14
hsa-miR-2964a-3p	0	0	0	1	3	2	0	3	0	0	0	0	0	0	0	0	0	4	1	0	14
hsa-miR-3192	1	4	0	9	0	0	0	0	0	0	0	0	0	0	0	0	0	0	0	0	14
hsa-miR-130a-5p	0	0	0	0	6	0	3	1	0	1	0	0	0	0	0	0	0	1	2	0	14
hsa-miR-372	0	0	0	0	0	2	2	0	0	9	0	0	0	0	0	0	0	1	0	0	14
hsa-miR-4640-3p	0	4	3	3	0	0	1	1	0	0	0	0	0	0	0	0	0	0	1	0	13
hsa-miR-23c	0	1	0	0	0	0	0	4	0	5	0	0	0	0	0	1	0	0	2	0	13
hsa-miR-3157-5p	0	3	0	3	0	4	1	0	0	0	0	0	0	0	0	0	0	2	0	0	13
hsa-miR-491-3p	0	2	0	0	0	1	2	3	0	3	0	0	0	0	0	0	0	2	0	0	13
hsa-miR-4642	0	1	7	5	0	0	0	0	0	0	0	0	0	0	0	0	0	0	0	0	13
hsa-miR-3607-5p	0	0	0	0	1	1	0	0	0	2	0	0	0	9	0	0	0	0	0	0	13
hsa-miR-1537	2	0	0	0	0	3	3	0	0	3	0	0	0	0	0	0	0	0	2	0	13
hsa-miR-378g	0	1	0	0	0	2	1	1	1	4	0	0	0	0	0	0	0	1	2	0	13
hsa-miR-4529-3p	0	0	0	0	0	2	2	1	0	1	0	0	0	0	0	0	0	1	2	4	13
hsa-miR-3121-3p	2	0	0	1	0	4	0	0	0	4	0	0	0	0	0	0	0	0	2	0	13
hsa-miR-3921	4	0	0	0	3	0	0	1	0	1	0	0	0	0	0	0	0	1	3	0	13
hsa-miR-4709-3p	2	0	4	0	2	0	1	0	0	0	0	0	0	0	0	0	0	0	3	0	12
hsa-miR-548s	4	0	2	1	0	0	4	1	0	0	0	0	0	0	0	0	0	0	0	0	12
hsa-miR-5089-3p	0	0	0	8	0	0	0	1	0	0	0	0	0	0	0	0	2	0	1	0	12
hsa-miR-4750-5p	5	5	0	0	0	0	0	0	0	0	0	0	0	0	0	0	0	0	2	0	12
hsa-miR-5708	0	0	0	0	3	0	2	0	0	4	0	0	0	0	0	0	0	3	0	0	12
hsa-miR-4519	0	0	0	0	1	5	1	0	0	0	0	0	0	0	0	0	0	0	2	3	12
hsa-miR-4677-5p	1	0	0	0	1	3	2	1	0	0	0	0	0	0	0	0	0	0	1	3	12
hsa-miR-198	0	0	5	6	0	0	1	0	0	0	0	0	0	0	0	0	0	0	0	0	12
hsa-miR-4741	0	0	6	4	0	0	1	0	0	1	0	0	0	0	0	0	0	0	0	0	12
hsa-miR-4772-3p	0	0	2	3	3	0	0	3	0	0	0	0	0	0	0	0	0	1	0	0	12
hsa-miR-4715-5p	0	1	0	0	0	0	0	0	0	0	0	0	0	9	0	0	0	0	2	0	12
hsa-miR-604	0	0	0	0	0	0	0	0	0	0	12	0	0	0	0	0	0	0	0	0	12
hsa-miR-1245b-5p	0	4	0	2	0	0	1	1	0	0	0	0	0	0	0	0	0	1	0	3	12
hsa-miR-4757-5p	4	2	0	1	0	0	1	0	0	0	0	0	0	0	1	0	0	1	1	1	12
hsa-miR-548a-3p	0	2	0	1	2	2	0	0	0	4	0	0	0	0	0	0	0	1	0	0	12
hsa-miR-4749-5p	5	0	4	0	0	0	0	2	0	1	0	0	0	0	0	0	0	0	0	0	12
hsa-miR-4660	2	0	0	7	0	0	2	0	0	0	0	0	0	0	0	0	0	1	0	0	12
hsa-miR-4723-5p	0	8	3	0	0	0	0	0	0	0	0	0	0	0	0	0	0	1	0	0	12
hsa-miR-2278	0	0	0	0	0	1	3	0	0	3	0	0	0	0	0	0	0	0	4	0	11
hsa-miR-503-3p	0	5	0	0	0	0	0	0	0	0	0	0	0	0	0	0	0	0	1	5	11
hsa-miR-548t-3p	0	0	3	0	0	2	0	3	0	0	0	0	0	0	0	0	0	0	3	0	11
hsa-miR-548u	0	1	0	5	0	2	0	1	0	0	0	0	0	0	0	0	0	1	1	0	11
hsa-miR-548aa	0	0	3	0	0	2	0	3	0	0	0	0	0	0	0	0	0	0	3	0	11
hsa-miR-2681-3p	0	0	0	1	0	1	5	0	0	0	0	0	0	0	0	0	0	0	3	1	11
hsa-miR-4517	0	1	0	6	0	1	0	1	0	2	0	0	0	0	0	0	0	0	0	0	11
hsa-miR-4444	0	0	4	2	1	0	1	0	0	2	0	0	0	0	0	0	0	0	0	1	11
hsa-miR-4424	0	0	0	0	1	0	1	1	0	2	0	0	0	0	0	0	0	0	1	5	11
hsa-miR-570-5p	0	2	4	0	0	0	4	1	0	0	0	0	0	0	0	0	0	0	0	0	11
hsa-miR-548ah-5p	0	5	3	3	0	0	0	0	0	0	0	0	0	0	0	0	0	0	0	0	11
hsa-miR-216a-3p	2	1	0	0	0	0	0	4	0	2	0	0	0	0	0	0	0	1	1	0	11
hsa-miR-642b-3p	0	0	0	0	0	2	0	0	0	0	0	0	0	0	9	0	0	0	0	0	11
hsa-miR-2113	0	0	0	0	0	0	0	0	0	0	0	0	0	0	0	0	9	0	2	0	11
hsa-miR-4796-5p	0	0	0	0	0	1	3	0	0	0	0	0	0	0	3	0	0	0	3	1	11
hsa-miR-545-3p	0	1	0	0	0	0	0	0	7	0	0	0	0	0	0	0	0	3	0	0	11
hsa-miR-551a	2	0	0	0	2	0	0	0	0	3	0	0	0	0	0	0	0	0	4	0	11
hsa-miR-3133	1	0	0	2	1	0	3	0	0	1	0	0	0	0	0	0	0	2	1	0	11
hsa-miR-548ai	0	2	4	0	0	0	4	1	0	0	0	0	0	0	0	0	0	0	0	0	11
hsa-miR-135a-3p	2	2	4	0	1	0	0	1	0	0	0	0	0	0	0	0	0	0	0	0	10
hsa-miR-549a	0	4	0	0	0	0	0	0	0	0	0	0	0	0	0	0	0	0	6	0	10
hsa-miR-4690-5p	0	1	0	0	0	1	0	1	0	0	0	0	0	0	0	0	7	0	0	0	10
hsa-miR-5697	0	0	0	7	0	0	0	0	0	0	0	0	0	0	0	0	0	0	3	0	10
hsa-miR-551b-3p	0	0	0	0	0	0	1	3	0	0	0	0	0	0	0	0	0	6	0	0	10
hsa-miR-597	0	0	0	0	4	0	1	1	0	1	0	0	0	0	0	0	0	2	1	0	10
hsa-miR-5702	0	0	0	6	1	0	1	0	0	2	0	0	0	0	0	0	0	0	0	0	10
hsa-miR-642a-3p	2	3	0	0	0	3	2	0	0	0	0	0	0	0	0	0	0	0	0	0	10
hsa-miR-4442	0	5	0	2	0	2	1	0	0	0	0	0	0	0	0	0	0	0	0	0	10
hsa-miR-876-3p	0	0	0	0	2	0	4	0	0	2	0	0	0	0	0	0	0	2	0	0	10
hsa-miR-658	0	1	0	9	0	0	0	0	0	0	0	0	0	0	0	0	0	0	0	0	10
hsa-miR-1233-3p	0	0	0	8	0	0	0	0	0	2	0	0	0	0	0	0	0	0	0	0	10
hsa-miR-1278	2	0	0	1	0	1	2	0	0	0	0	0	0	0	0	0	0	0	0	4	10
hsa-miR-1225-3p	2	0	0	0	0	2	0	0	0	1	0	0	0	0	0	0	0	0	0	5	10
hsa-miR-4649-5p	7	0	0	0	0	0	1	0	0	0	0	0	0	0	0	0	0	0	1	0	9
hsa-miR-4474-3p	0	1	0	2	4	0	0	0	0	0	0	0	0	0	0	0	0	2	0	0	9
hsa-miR-4763-5p	0	1	0	0	0	2	1	1	0	0	0	0	0	0	0	0	0	0	4	0	9
hsa-miR-4436b-3p	0	0	0	9	0	0	0	0	0	0	0	0	0	0	0	0	0	0	0	0	9
hsa-miR-1912	0	3	0	0	2	0	0	1	0	0	0	0	0	0	0	0	0	1	2	0	9
hsa-miR-149-3p	0	1	5	2	0	0	0	1	0	0	0	0	0	0	0	0	0	0	0	0	9
hsa-miR-3160-5p	0	0	0	0	0	0	0	0	0	0	0	0	0	9	0	0	0	0	0	0	9
hsa-miR-449b-3p	0	0	6	1	0	0	0	0	0	0	0	0	0	2	0	0	0	0	0	0	9
hsa-miR-5094	0	3	0	0	0	0	0	3	0	0	0	0	0	0	0	0	0	0	3	0	9
hsa-miR-203b-5p	0	0	0	0	0	0	0	0	0	0	9	0	0	0	0	0	0	0	0	0	9
hsa-miR-3146	0	0	0	5	1	0	0	0	0	0	0	0	0	0	0	0	3	0	0	0	9
hsa-miR-519c-3p	0	0	0	0	0	0	0	0	0	4	0	0	0	0	0	0	0	0	5	0	9
hsa-miR-548ap-5p	1	0	0	0	0	1	0	0	0	4	0	0	0	0	0	0	0	3	0	0	9
hsa-miR-4794	0	0	1	0	0	0	0	0	0	0	0	0	0	0	0	0	7	0	0	1	9
hsa-miR-5581-3p	0	1	0	1	0	1	2	3	0	1	0	0	0	0	0	0	0	0	0	0	9
hsa-miR-590-5p	1	0	0	0	0	2	1	1	0	3	0	0	0	0	0	0	0	0	1	0	9
hsa-miR-1913	4	5	0	0	0	0	0	0	0	0	0	0	0	0	0	0	0	0	0	0	9
hsa-miR-4688	5	4	0	0	0	0	0	0	0	0	0	0	0	0	0	0	0	0	0	0	9
hsa-miR-3676-3p	0	0	0	0	0	0	2	0	0	0	0	0	0	7	0	0	0	0	0	0	9
hsa-miR-3944-3p	1	1	3	4	0	0	0	0	0	0	0	0	0	0	0	0	0	0	0	0	9
hsa-miR-135b-3p	0	0	0	0	6	3	0	0	0	0	0	0	0	0	0	0	0	0	0	0	9
hsa-miR-4785	1	0	0	4	0	0	4	0	0	0	0	0	0	0	0	0	0	0	0	0	9
hsa-miR-758-5p	0	1	0	0	0	0	0	3	0	1	0	0	0	0	0	0	0	0	0	3	8
hsa-miR-5682	0	5	0	0	0	1	1	0	0	0	0	0	0	0	0	0	0	0	1	0	8
hsa-miR-3120-3p	3	0	0	0	0	0	0	0	0	3	0	0	0	0	0	0	0	0	0	2	8
hsa-miR-5001-5p	2	0	0	0	0	5	0	1	0	0	0	0	0	0	0	0	0	0	0	0	8
hsa-miR-381-5p	0	0	0	0	0	0	0	1	0	1	0	0	0	0	0	0	0	0	2	4	8
hsa-miR-1193	0	2	4	0	0	0	0	0	0	0	0	0	0	0	0	0	0	0	0	2	8
hsa-miR-4725-3p	5	0	0	0	1	0	0	0	0	0	0	0	0	0	0	0	0	0	2	0	8
hsa-miR-765	0	1	1	4	2	0	0	0	0	0	0	0	0	0	0	0	0	0	0	0	8
hsa-miR-4666a-5p	0	0	5	0	0	0	0	0	0	1	0	0	0	0	0	0	0	0	2	0	8
hsa-miR-4735-5p	0	0	0	0	0	0	0	0	0	0	0	0	0	0	0	0	0	2	0	6	8
hsa-miR-4679	1	0	0	0	1	0	0	4	0	1	0	0	0	0	0	0	0	1	0	0	8
hsa-miR-3915	3	0	0	0	0	0	0	0	0	0	0	0	0	0	0	0	0	0	0	5	8
hsa-miR-4725-5p	3	2	0	3	0	0	0	0	0	0	0	0	0	0	0	0	0	0	0	0	8
hsa-miR-1972	0	0	2	1	1	0	0	0	0	2	0	0	0	0	0	0	0	2	0	0	8
hsa-miR-5187-5p	0	0	0	2	0	0	0	0	0	2	0	0	0	0	0	0	0	1	3	0	8
hsa-miR-4423-5p	0	0	0	0	0	0	0	1	0	0	0	0	7	0	0	0	0	0	0	0	8
hsa-miR-1288	0	0	0	5	0	0	2	0	0	0	0	0	0	0	0	0	0	1	0	0	8
hsa-miR-581	3	0	0	0	0	1	0	0	0	0	0	0	0	0	0	0	0	0	4	0	8
hsa-miR-5001-3p	1	0	0	0	0	1	0	3	0	0	0	0	0	0	0	0	0	2	1	0	8
hsa-miR-526b-5p	0	0	0	0	0	1	0	1	0	1	0	0	0	0	0	0	0	0	0	5	8
hsa-miR-5188	0	0	0	0	1	0	0	0	0	0	0	0	0	0	5	0	0	0	0	2	8
hsa-miR-3914	0	3	0	0	0	0	0	0	0	1	0	0	0	0	0	0	0	1	3	0	8
hsa-miR-4433-3p	0	0	7	0	0	0	1	0	0	0	0	0	0	0	0	0	0	0	0	0	8
hsa-miR-523-3p	0	0	0	0	0	0	0	0	0	0	0	0	0	0	8	0	0	0	0	0	8
hsa-miR-933	1	0	0	0	0	1	0	0	0	0	0	0	0	0	0	0	5	0	1	0	8
hsa-miR-943	0	0	0	2	0	0	1	0	1	0	0	0	0	0	0	0	0	0	3	0	7
hsa-miR-1273f	0	1	0	1	0	0	0	0	0	0	0	0	0	0	4	0	0	0	1	0	7
hsa-miR-4751	1	0	0	0	0	0	0	0	0	2	0	0	0	4	0	0	0	0	0	0	7
hsa-miR-5003-3p	4	0	0	0	0	0	1	1	0	1	0	0	0	0	0	0	0	0	0	0	7
hsa-miR-586	0	0	0	3	1	0	0	0	0	0	0	0	0	0	0	0	0	0	0	3	7
hsa-miR-320e	0	0	6	0	1	0	0	0	0	0	0	0	0	0	0	0	0	0	0	0	7
hsa-miR-3131	0	0	3	0	0	0	4	0	0	0	0	0	0	0	0	0	0	0	0	0	7
hsa-miR-4682	0	2	0	0	0	2	0	1	0	2	0	0	0	0	0	0	0	0	0	0	7
hsa-miR-548v	0	0	0	0	1	3	2	0	0	1	0	0	0	0	0	0	0	0	0	0	7
hsa-miR-2681-5p	0	0	0	0	1	0	2	0	0	2	0	0	0	0	0	0	0	0	0	2	7
hsa-miR-6501-5p	1	3	0	0	0	1	1	0	0	0	0	0	0	0	0	0	0	0	1	0	7
hsa-miR-497-3p	0	0	0	0	0	0	0	0	0	0	0	0	0	0	0	0	0	0	2	5	7
hsa-miR-4661-3p	0	2	0	1	0	2	0	1	0	0	0	0	0	0	0	0	0	1	0	0	7
hsa-miR-4506	2	0	0	0	0	2	1	0	0	0	0	0	0	0	0	0	0	0	2	0	7
hsa-miR-4467	3	1	0	0	0	0	1	2	0	0	0	0	0	0	0	0	0	0	0	0	7
hsa-miR-4802-3p	0	0	0	2	0	0	2	3	0	0	0	0	0	0	0	0	0	0	0	0	7
hsa-miR-4524a-5p	0	0	0	0	0	0	0	1	0	0	0	0	0	0	0	0	0	2	4	0	7
hsa-miR-508-5p	0	1	0	0	4	0	1	0	0	0	0	0	0	0	0	0	0	0	1	0	7
hsa-miR-4636	0	0	0	0	1	0	0	0	0	0	0	0	0	0	5	0	0	0	1	0	7
hsa-miR-3654	0	0	0	2	0	3	1	0	0	1	0	0	0	0	0	0	0	0	0	0	7
hsa-miR-636	0	4	0	0	0	0	0	0	0	3	0	0	0	0	0	0	0	0	0	0	7
hsa-miR-5006-3p	0	0	0	4	0	0	0	0	0	0	0	0	0	0	3	0	0	0	0	0	7
hsa-miR-3678-5p	0	0	0	4	0	0	0	0	0	3	0	0	0	0	0	0	0	0	0	0	7
hsa-miR-4658	4	0	2	0	0	0	0	1	0	0	0	0	0	0	0	0	0	0	0	0	7
hsa-miR-302d-3p	0	0	0	0	0	0	1	2	0	0	0	0	0	0	0	0	0	0	0	4	7
hsa-miR-4463	0	0	6	0	0	0	0	0	0	0	0	0	0	0	0	0	0	0	0	0	6
hsa-miR-4799-5p	3	2	0	0	0	1	0	0	0	0	0	0	0	0	0	0	0	0	0	0	6
hsa-miR-378f	0	0	0	0	0	0	0	0	0	0	0	0	0	1	0	0	0	0	2	3	6
hsa-miR-599	0	0	0	0	0	0	0	0	0	0	0	0	0	0	0	0	0	0	0	6	6
hsa-miR-154-3p	0	0	0	0	0	1	0	0	0	3	0	0	0	0	0	0	0	2	0	0	6
hsa-miR-1263	4	2	0	0	0	0	0	0	0	0	0	0	0	0	0	0	0	0	0	0	6
hsa-miR-3911	1	0	0	4	0	0	0	0	0	0	0	0	0	0	0	0	0	0	0	1	6
hsa-miR-3684	0	0	0	0	2	3	0	1	0	0	0	0	0	0	0	0	0	0	0	0	6
hsa-miR-3158-5p	0	0	0	0	0	0	0	0	0	0	0	0	0	0	0	0	0	1	0	5	6
hsa-miR-3194-3p	0	0	0	4	0	0	0	0	0	0	0	0	0	0	0	0	0	2	0	0	6
hsa-miR-518e-3p	0	0	0	0	0	1	0	0	0	0	0	0	0	0	5	0	0	0	0	0	6
hsa-miR-1229-3p	1	0	0	3	2	0	0	0	0	0	0	0	0	0	0	0	0	0	0	0	6
hsa-miR-6125	0	0	3	2	0	0	1	0	0	0	0	0	0	0	0	0	0	0	0	0	6
hsa-miR-1244	0	4	0	0	0	1	0	0	0	0	0	0	0	0	0	0	0	1	0	0	6
hsa-miR-3180-5p	0	3	2	0	0	0	0	0	0	0	0	0	0	0	0	0	0	1	0	0	6
hsa-miR-6508-5p	0	0	0	3	1	0	0	0	0	0	0	0	0	0	0	0	0	0	2	0	6
hsa-miR-892b	0	1	0	0	1	0	0	0	0	0	0	0	0	0	0	0	0	0	4	0	6
hsa-miR-4714-3p	0	0	1	0	1	0	0	0	0	1	0	0	0	0	0	0	0	0	3	0	6
hsa-miR-3660	0	1	0	4	0	0	0	1	0	0	0	0	0	0	0	0	0	0	0	0	6
hsa-miR-552	0	0	0	0	0	0	0	0	0	0	0	0	0	0	5	0	0	0	1	0	6
hsa-miR-4422	0	0	0	0	0	0	1	0	0	0	0	0	0	0	0	0	0	0	0	5	6
hsa-miR-588	0	0	0	0	0	0	0	0	0	0	0	0	0	6	0	0	0	0	0	0	6
hsa-miR-4683	0	1	0	4	0	0	0	0	0	0	0	0	0	0	0	0	0	1	0	0	6
hsa-miR-4798-5p	2	0	0	0	0	0	2	2	0	0	0	0	0	0	0	0	0	0	0	0	6
hsa-miR-4695-5p	0	0	0	6	0	0	0	0	0	0	0	0	0	0	0	0	0	0	0	0	6
hsa-miR-4732-5p	0	0	0	2	0	0	0	0	0	3	0	0	0	0	0	0	0	0	0	0	5
hsa-miR-4638-5p	0	0	3	0	1	0	1	0	0	0	0	0	0	0	0	0	0	0	0	0	5
hsa-miR-548d-3p	0	0	0	0	0	0	4	0	0	0	0	0	0	0	0	0	0	1	0	0	5
hsa-miR-525-5p	0	5	0	0	0	0	0	0	0	0	0	0	0	0	0	0	0	0	0	0	5
hsa-miR-3194-5p	2	0	0	0	0	1	0	2	0	0	0	0	0	0	0	0	0	0	0	0	5
hsa-miR-4784	0	0	2	3	0	0	0	0	0	0	0	0	0	0	0	0	0	0	0	0	5
hsa-miR-4731-3p	2	0	0	0	0	0	0	0	0	0	0	0	0	0	0	0	0	3	0	0	5
hsa-miR-4714-5p	0	0	0	0	0	3	0	0	0	0	0	0	0	0	0	0	0	0	2	0	5
hsa-miR-4508	5	0	0	0	0	0	0	0	0	0	0	0	0	0	0	0	0	0	0	0	5
hsa-miR-1273g-3p	0	0	0	0	0	1	0	0	0	0	0	0	0	0	0	0	0	0	4	0	5
hsa-miR-584-3p	0	0	0	0	0	0	0	0	0	0	0	0	0	0	0	0	0	0	0	5	5
hsa-miR-3927-3p	0	0	0	0	0	0	3	2	0	0	0	0	0	0	0	0	0	0	0	0	5
hsa-miR-4520a-5p	0	4	0	0	0	0	0	0	0	1	0	0	0	0	0	0	0	0	0	0	5
hsa-miR-3160-3p	0	1	0	3	0	0	1	0	0	0	0	0	0	0	0	0	0	0	0	0	5
hsa-miR-1229-5p	0	0	5	0	0	0	0	0	0	0	0	0	0	0	0	0	0	0	0	0	5
hsa-miR-3185	0	0	0	3	0	0	2	0	0	0	0	0	0	0	0	0	0	0	0	0	5
hsa-miR-2964a-5p	0	1	0	0	1	2	1	0	0	0	0	0	0	0	0	0	0	0	0	0	5
hsa-miR-4437	0	0	0	0	0	0	0	0	0	0	0	0	0	0	5	0	0	0	0	0	5
hsa-miR-509-5p	0	0	0	0	2	3	0	0	0	0	0	0	0	0	0	0	0	0	0	0	5
hsa-miR-1265	0	4	0	0	0	0	0	0	0	1	0	0	0	0	0	0	0	0	0	0	5
hsa-miR-3140-3p	0	0	0	0	0	1	0	0	0	0	0	0	0	0	0	0	0	0	1	3	5
hsa-miR-6512-5p	0	0	0	0	0	0	0	0	0	0	0	0	0	0	0	0	0	1	0	4	5
hsa-miR-4737	0	0	0	0	0	1	0	0	0	0	0	0	0	0	0	0	0	1	3	0	5
hsa-miR-4716-5p	0	0	0	0	0	0	0	0	0	0	0	0	0	0	0	0	0	0	0	5	5
hsa-miR-5588-3p	0	0	0	0	0	0	0	1	0	0	0	0	0	0	0	0	0	0	4	0	5
hsa-miR-1283	0	0	0	0	1	2	1	1	0	0	0	0	0	0	0	0	0	0	0	0	5
hsa-miR-1226-5p	0	0	3	0	0	2	0	0	0	0	0	0	0	0	0	0	0	0	0	0	5
hsa-miR-877-3p	0	0	1	4	0	0	0	0	0	0	0	0	0	0	0	0	0	0	0	0	5
hsa-miR-1267	0	0	3	0	0	0	0	0	0	1	0	0	0	0	0	0	0	0	0	0	4
hsa-miR-4708-3p	0	0	0	0	0	0	0	1	0	3	0	0	0	0	0	0	0	0	0	0	4
hsa-miR-3149	0	1	0	0	0	0	0	0	0	2	0	0	0	0	0	0	0	1	0	0	4
hsa-miR-4731-5p	0	0	0	3	0	0	1	0	0	0	0	0	0	0	0	0	0	0	0	0	4
hsa-miR-302a-5p	0	0	0	0	0	0	0	0	0	0	0	0	0	0	0	0	0	0	0	4	4
hsa-miR-4689	4	0	0	0	0	0	0	0	0	0	0	0	0	0	0	0	0	0	0	0	4
hsa-miR-5690	0	0	0	2	0	0	0	0	0	2	0	0	0	0	0	0	0	0	0	0	4
hsa-miR-4790-5p	0	4	0	0	0	0	0	0	0	0	0	0	0	0	0	0	0	0	0	0	4
hsa-miR-378i	0	0	1	0	0	0	0	0	0	0	1	0	0	0	0	0	0	0	0	2	4
hsa-miR-4433-5p	0	2	0	2	0	0	0	0	0	0	0	0	0	0	0	0	0	0	0	0	4
hsa-miR-512-3p	0	0	0	0	0	1	0	1	0	1	0	0	0	0	0	0	0	0	1	0	4
hsa-miR-937-5p	0	0	0	2	0	0	0	0	0	0	0	0	0	0	0	0	0	0	0	2	4
hsa-miR-4756-5p	0	0	4	0	0	0	0	0	0	0	0	0	0	0	0	0	0	0	0	0	4
hsa-miR-4446-5p	0	0	0	0	0	0	1	0	0	0	0	0	0	0	0	0	0	0	0	3	4
hsa-miR-4514	0	0	4	0	0	0	0	0	0	0	0	0	0	0	0	0	0	0	0	0	4
hsa-miR-4501	0	0	0	4	0	0	0	0	0	0	0	0	0	0	0	0	0	0	0	0	4
hsa-miR-5189	3	0	0	0	0	1	0	0	0	0	0	0	0	0	0	0	0	0	0	0	4
hsa-miR-3659	2	0	0	0	1	0	0	0	0	1	0	0	0	0	0	0	0	0	0	0	4
hsa-miR-639	0	0	0	1	0	0	0	1	0	0	0	0	0	0	0	0	0	0	2	0	4
hsa-miR-4428	1	2	0	0	0	0	0	0	0	1	0	0	0	0	0	0	0	0	0	0	4
hsa-miR-138-2-3p	1	3	0	0	0	0	0	0	0	0	0	0	0	0	0	0	0	0	0	0	4
hsa-miR-5707	0	0	0	2	1	0	0	1	0	0	0	0	0	0	0	0	0	0	0	0	4
hsa-miR-3170	3	0	0	1	0	0	0	0	0	0	0	0	0	0	0	0	0	0	0	0	4
hsa-miR-376a-2-5p	2	0	0	0	0	0	2	0	0	0	0	0	0	0	0	0	0	0	0	0	4
hsa-miR-378e	0	0	0	0	0	0	0	0	0	0	0	0	0	0	0	0	0	1	1	2	4
hsa-miR-3907	0	0	0	3	0	0	1	0	0	0	0	0	0	0	0	0	0	0	0	0	4
hsa-miR-4727-3p	0	0	0	0	0	0	0	0	0	3	0	0	0	0	0	0	0	0	1	0	4
hsa-miR-4726-5p	0	2	0	0	0	0	2	0	0	0	0	0	0	0	0	0	0	0	0	0	4
hsa-miR-4637	0	0	0	0	0	0	0	0	0	1	0	0	0	0	0	0	0	0	3	0	4
hsa-miR-4659b-3p	0	4	0	0	0	0	0	0	0	0	0	0	0	0	0	0	0	0	0	0	4
hsa-miR-4779	4	0	0	0	0	0	0	0	0	0	0	0	0	0	0	0	0	0	0	0	4
hsa-miR-548am-3p	0	2	0	0	0	1	0	0	0	0	0	0	0	0	0	0	0	1	0	0	4
hsa-miR-3939	0	0	0	3	0	0	1	0	0	0	0	0	0	0	0	0	0	0	0	0	4
hsa-miR-4776-5p	0	0	0	0	0	0	0	0	0	0	0	0	0	0	0	0	0	0	1	3	4
hsa-miR-466	0	1	0	0	0	0	1	0	0	0	0	0	0	0	0	0	0	0	2	0	4
hsa-miR-4766-3p	0	0	0	0	0	2	0	0	0	2	0	0	0	0	0	0	0	0	0	0	4
hsa-miR-218-2-3p	0	3	0	1	0	0	0	0	0	0	0	0	0	0	0	0	0	0	0	0	4
hsa-miR-4657	0	0	0	0	1	0	0	0	0	3	0	0	0	0	0	0	0	0	0	0	4
hsa-miR-4423-3p	0	2	0	0	0	0	2	0	0	0	0	0	0	0	0	0	0	0	0	0	4
hsa-miR-3141	0	0	0	0	0	0	0	0	0	0	0	0	0	0	0	0	0	0	0	4	4
hsa-miR-4768-3p	2	0	0	0	0	0	2	0	0	0	0	0	0	0	0	0	0	0	0	0	4
hsa-miR-1302	0	0	0	0	0	0	1	0	0	0	0	0	0	0	0	0	0	2	1	0	4
hsa-miR-548ao-3p	0	0	0	0	0	0	2	0	0	0	0	0	0	0	0	0	0	0	1	0	3
hsa-miR-5089-5p	0	0	0	0	0	3	0	0	0	0	0	0	0	0	0	0	0	0	0	0	3
hsa-miR-4659a-3p	1	0	1	0	0	0	0	0	0	0	0	0	0	0	0	0	0	1	0	0	3
hsa-miR-6132	0	0	1	0	0	0	2	0	0	0	0	0	0	0	0	0	0	0	0	0	3
hsa-miR-4477a	0	0	0	0	0	0	2	1	0	0	0	0	0	0	0	0	0	0	0	0	3
hsa-miR-4491	0	0	0	0	0	0	0	0	0	2	0	0	0	0	0	0	0	0	1	0	3
hsa-miR-4479	1	0	0	0	0	0	1	1	0	0	0	0	0	0	0	0	0	0	0	0	3
hsa-miR-6718-5p	0	0	0	0	0	2	0	0	0	1	0	0	0	0	0	0	0	0	0	0	3
hsa-miR-5585-5p	0	0	0	0	0	0	0	3	0	0	0	0	0	0	0	0	0	0	0	0	3
hsa-miR-1260a	0	2	0	1	0	0	0	0	0	0	0	0	0	0	0	0	0	0	0	0	3
hsa-miR-5586-5p	0	0	0	0	0	2	0	0	0	1	0	0	0	0	0	0	0	0	0	0	3
hsa-miR-4791	0	0	0	0	0	0	2	1	0	0	0	0	0	0	0	0	0	0	0	0	3
hsa-miR-579	0	3	0	0	0	0	0	0	0	0	0	0	0	0	0	0	0	0	0	0	3
hsa-miR-4509	0	0	0	0	0	0	0	0	0	0	0	0	0	0	0	0	0	0	0	3	3
hsa-miR-519d	0	0	0	0	0	0	0	0	0	0	0	0	0	0	0	0	0	0	3	0	3
hsa-miR-422a	0	0	0	0	1	1	0	0	0	0	1	0	0	0	0	0	0	0	0	0	3
hsa-miR-4524a-3p	0	0	0	0	0	0	0	0	0	0	0	0	0	0	0	0	0	0	3	0	3
hsa-miR-4711-5p	0	0	0	0	0	0	0	1	0	1	0	0	0	0	0	0	0	1	0	0	3
hsa-miR-4532	0	0	0	0	0	1	0	0	0	0	0	0	0	0	0	0	0	1	0	1	3
hsa-miR-3689f	0	1	2	0	0	0	0	0	0	0	0	0	0	0	0	0	0	0	0	0	3
hsa-miR-5700	1	0	0	0	0	0	0	2	0	0	0	0	0	0	0	0	0	0	0	0	3
hsa-miR-624-3p	0	0	0	0	0	1	0	1	0	0	0	0	0	0	0	0	0	0	1	0	3
hsa-miR-890	0	0	0	0	3	0	0	0	0	0	0	0	0	0	0	0	0	0	0	0	3
hsa-miR-548a-5p	0	0	0	0	0	0	1	2	0	0	0	0	0	0	0	0	0	0	0	0	3
hsa-miR-4733-5p	3	0	0	0	0	0	0	0	0	0	0	0	0	0	0	0	0	0	0	0	3
hsa-miR-3143	0	0	0	0	1	0	1	0	0	0	0	0	0	0	0	0	0	1	0	0	3
hsa-miR-4699-5p	0	0	0	0	0	0	0	0	0	1	0	0	0	0	0	0	0	2	0	0	3
hsa-miR-4504	0	0	0	0	0	1	1	0	0	1	0	0	0	0	0	0	0	0	0	0	3
hsa-miR-3685	0	0	0	0	0	0	0	0	0	0	0	0	0	0	0	0	0	0	3	0	3
hsa-miR-3135a	0	3	0	0	0	0	0	0	0	0	0	0	0	0	0	0	0	0	0	0	3
hsa-miR-4670-5p	1	0	0	0	0	0	2	0	0	0	0	0	0	0	0	0	0	0	0	0	3
hsa-miR-4795-3p	0	0	0	0	1	0	0	0	0	2	0	0	0	0	0	0	0	0	0	0	3
hsa-miR-4427	0	0	0	0	0	0	1	2	0	0	0	0	0	0	0	0	0	0	0	0	3
hsa-miR-1292-3p	0	0	3	0	0	0	0	0	0	0	0	0	0	0	0	0	0	0	0	0	3
hsa-miR-548av-3p	0	1	0	0	0	0	2	0	0	0	0	0	0	0	0	0	0	0	0	0	3
hsa-miR-4518	3	0	0	0	0	0	0	0	0	0	0	0	0	0	0	0	0	0	0	0	3
hsa-miR-609	0	0	0	0	0	1	0	0	0	2	0	0	0	0	0	0	0	0	0	0	3
hsa-miR-4440	0	0	0	3	0	0	0	0	0	0	0	0	0	0	0	0	0	0	0	0	3
hsa-miR-4648	0	3	0	0	0	0	0	0	0	0	0	0	0	0	0	0	0	0	0	0	3
hsa-miR-4510	0	1	0	0	0	0	0	0	0	0	0	0	0	0	0	0	0	2	0	0	3
hsa-miR-1256	0	0	0	0	0	1	0	1	0	1	0	0	0	0	0	0	0	0	0	0	3
hsa-miR-4774-5p	0	0	0	0	0	0	0	0	0	0	0	0	0	0	0	0	0	0	0	3	3
hsa-miR-3165	0	0	0	0	0	0	0	0	0	0	0	0	0	0	0	0	0	0	0	3	3
hsa-miR-4701-3p	3	0	0	0	0	0	0	0	0	0	0	0	0	0	0	0	0	0	0	0	3
hsa-miR-4639-5p	0	0	0	0	1	0	2	0	0	0	0	0	0	0	0	0	0	0	0	0	3
hsa-miR-4729	0	0	0	0	0	0	2	0	0	1	0	0	0	0	0	0	0	0	0	0	3
hsa-miR-3664-5p	0	0	0	0	0	0	0	0	0	1	0	0	0	0	0	0	0	0	2	0	3
hsa-miR-3920	0	0	0	0	0	0	0	0	0	0	0	0	0	0	0	0	0	0	0	3	3
hsa-miR-5095	0	0	0	0	0	3	0	0	0	0	0	0	0	0	0	0	0	0	0	0	3
hsa-miR-5582-3p	0	1	0	0	0	1	0	0	0	0	0	0	0	0	0	0	0	1	0	0	3
hsa-miR-1293	0	0	2	0	1	0	0	0	0	0	0	0	0	0	0	0	0	0	0	0	3
hsa-miR-4740-5p	1	0	0	0	0	0	0	0	0	0	0	0	0	0	0	0	0	1	0	0	2
hsa-miR-4674	0	0	0	0	0	0	1	0	0	1	0	0	0	0	0	0	0	0	0	0	2
hsa-miR-4730	0	0	0	0	0	0	2	0	0	0	0	0	0	0	0	0	0	0	0	0	2
hsa-miR-520g	0	0	0	0	0	2	0	0	0	0	0	0	0	0	0	0	0	0	0	0	2
hsa-miR-1237-5p	0	2	0	0	0	0	0	0	0	0	0	0	0	0	0	0	0	0	0	0	2
hsa-miR-551b-5p	2	0	0	0	0	0	0	0	0	0	0	0	0	0	0	0	0	0	0	0	2
hsa-miR-3677-5p	0	0	0	0	0	0	0	0	0	0	0	0	0	0	0	0	0	0	2	0	2
hsa-miR-4678	0	0	0	0	0	0	0	0	0	0	0	0	0	0	0	0	0	0	2	0	2
hsa-miR-122-3p	0	0	0	0	0	0	0	0	0	0	0	0	0	0	0	0	0	2	0	0	2
hsa-miR-5193	0	0	0	0	0	0	1	0	0	0	0	0	0	0	0	0	0	1	0	0	2
hsa-miR-4758-3p	2	0	0	0	0	0	0	0	0	0	0	0	0	0	0	0	0	0	0	0	2
hsa-miR-4781-5p	0	0	0	2	0	0	0	0	0	0	0	0	0	0	0	0	0	0	0	0	2
hsa-miR-378b	0	0	0	0	0	1	0	0	0	0	1	0	0	0	0	0	0	0	0	0	2
hsa-miR-4745-3p	2	0	0	0	0	0	0	0	0	0	0	0	0	0	0	0	0	0	0	0	2
hsa-miR-3691-3p	0	2	0	0	0	0	0	0	0	0	0	0	0	0	0	0	0	0	0	0	2
hsa-miR-556-3p	0	0	0	0	0	0	0	1	0	0	0	0	0	0	0	0	0	1	0	0	2
hsa-miR-5002-3p	0	0	0	0	0	0	0	0	0	2	0	0	0	0	0	0	0	0	0	0	2
hsa-miR-891b	0	0	0	0	1	0	0	0	0	0	0	0	0	0	0	0	0	0	1	0	2
hsa-miR-5090	0	0	0	0	0	0	0	2	0	0	0	0	0	0	0	0	0	0	0	0	2
hsa-miR-3124-3p	0	0	0	0	0	0	0	0	0	2	0	0	0	0	0	0	0	0	0	0	2
hsa-miR-4777-3p	0	1	0	0	0	1	0	0	0	0	0	0	0	0	0	0	0	0	0	0	2
hsa-miR-517-5p	0	0	0	0	0	0	0	1	0	0	0	0	0	0	0	0	0	0	1	0	2
hsa-miR-4635	0	0	2	0	0	0	0	0	0	0	0	0	0	0	0	0	0	0	0	0	2
hsa-miR-6507-3p	0	0	0	0	0	0	0	0	0	0	0	0	0	0	0	0	0	2	0	0	2
hsa-miR-3611	0	1	0	0	0	0	0	0	0	1	0	0	0	0	0	0	0	0	0	0	2
hsa-miR-561-3p	0	0	0	0	0	0	0	2	0	0	0	0	0	0	0	0	0	0	0	0	2
hsa-miR-4743-5p	2	0	0	0	0	0	0	0	0	0	0	0	0	0	0	0	0	0	0	0	2
hsa-miR-559	0	0	0	2	0	0	0	0	0	0	0	0	0	0	0	0	0	0	0	0	2
hsa-miR-4426	0	0	0	0	0	2	0	0	0	0	0	0	0	0	0	0	0	0	0	0	2
hsa-miR-548x-5p	0	0	0	0	0	0	0	2	0	0	0	0	0	0	0	0	0	0	0	0	2
hsa-miR-3173-3p	0	1	0	0	0	0	0	1	0	0	0	0	0	0	0	0	0	0	0	0	2
hsa-miR-4487	0	0	0	2	0	0	0	0	0	0	0	0	0	0	0	0	0	0	0	0	2
hsa-miR-4761-3p	0	0	0	0	0	0	1	0	0	1	0	0	0	0	0	0	0	0	0	0	2
hsa-miR-4469	2	0	0	0	0	0	0	0	0	0	0	0	0	0	0	0	0	0	0	0	2
hsa-miR-548aj-5p	0	0	0	0	0	0	0	2	0	0	0	0	0	0	0	0	0	0	0	0	2
hsa-miR-449c-3p	0	0	0	0	0	2	0	0	0	0	0	0	0	0	0	0	0	0	0	0	2
hsa-miR-548ar-5p	0	0	0	0	0	0	0	2	0	0	0	0	0	0	0	0	0	0	0	0	2
hsa-miR-3155b	2	0	0	0	0	0	0	0	0	0	0	0	0	0	0	0	0	0	0	0	2
hsa-miR-5571-3p	2	0	0	0	0	0	0	0	0	0	0	0	0	0	0	0	0	0	0	0	2
hsa-miR-3145-3p	0	0	0	0	0	0	1	0	0	0	0	0	0	0	0	0	0	1	0	0	2
hsa-miR-345-3p	0	0	0	0	0	0	1	1	0	0	0	0	0	0	0	0	0	0	0	0	2
hsa-miR-1277-3p	0	0	0	0	1	1	0	0	0	0	0	0	0	0	0	0	0	0	0	0	2
hsa-miR-4734	0	0	0	0	0	0	1	0	0	0	0	0	0	0	0	0	0	1	0	0	2
hsa-miR-2115-5p	0	0	0	0	1	0	1	0	0	0	0	0	0	0	0	0	0	0	0	0	2
hsa-miR-4704-5p	0	0	0	0	0	0	0	0	0	0	0	0	0	0	0	0	0	0	2	0	2
hsa-miR-4792	0	0	0	0	0	0	0	1	0	0	0	0	0	0	0	0	1	0	0	0	2
hsa-miR-4691-3p	0	0	0	0	0	1	1	0	0	0	0	0	0	0	0	0	0	0	0	0	2
hsa-miR-578	0	0	0	0	0	0	0	0	0	2	0	0	0	0	0	0	0	0	0	0	2
hsa-miR-4651	0	0	2	0	0	0	0	0	0	0	0	0	0	0	0	0	0	0	0	0	2
hsa-miR-451b	0	0	0	0	1	0	0	0	0	0	0	0	0	0	0	0	0	1	0	0	2
hsa-miR-4708-5p	0	0	0	0	2	0	0	0	0	0	0	0	0	0	0	0	0	0	0	0	2
hsa-miR-323a-5p	2	0	0	0	0	0	0	0	0	0	0	0	0	0	0	0	0	0	0	0	2
hsa-miR-4724-5p	0	0	0	0	0	0	0	0	0	0	0	0	0	0	0	0	0	0	2	0	2
hsa-miR-548y	0	0	0	0	0	2	0	0	0	0	0	0	0	0	0	0	0	0	0	0	2
hsa-miR-4662a-3p	0	0	0	0	0	0	1	0	0	0	0	0	0	0	0	0	0	0	1	0	2
hsa-miR-4681	0	2	0	0	0	0	0	0	0	0	0	0	0	0	0	0	0	0	0	0	2
hsa-miR-548g-5p	0	0	0	0	0	0	0	2	0	0	0	0	0	0	0	0	0	0	0	0	2
hsa-miR-522-5p	0	0	0	0	0	1	0	0	0	0	0	0	0	0	0	0	0	0	0	0	1
hsa-miR-4743-3p	0	1	0	0	0	0	0	0	0	0	0	0	0	0	0	0	0	0	0	0	1
hsa-miR-515-5p	0	0	0	0	0	1	0	0	0	0	0	0	0	0	0	0	0	0	0	0	1
hsa-miR-3940-5p	0	0	0	0	0	0	0	0	0	0	0	0	0	0	0	0	0	1	0	0	1
hsa-miR-4695-3p	0	1	0	0	0	0	0	0	0	0	0	0	0	0	0	0	0	0	0	0	1
hsa-miR-5196-3p	0	0	0	0	0	0	0	0	0	0	0	0	0	0	0	0	0	1	0	0	1
hsa-miR-518e-5p	0	0	0	0	0	1	0	0	0	0	0	0	0	0	0	0	0	0	0	0	1
hsa-miR-5705	0	0	0	0	1	0	0	0	0	0	0	0	0	0	0	0	0	0	0	0	1
hsa-miR-513a-3p	0	0	0	0	1	0	0	0	0	0	0	0	0	0	0	0	0	0	0	0	1
hsa-miR-3619-5p	0	0	0	1	0	0	0	0	0	0	0	0	0	0	0	0	0	0	0	0	1
hsa-miR-3910	0	0	0	0	0	0	1	0	0	0	0	0	0	0	0	0	0	0	0	0	1
hsa-miR-1231	0	0	0	0	0	0	1	0	0	0	0	0	0	0	0	0	0	0	0	0	1
hsa-miR-4693-3p	0	0	0	0	0	0	0	1	0	0	0	0	0	0	0	0	0	0	0	0	1
hsa-miR-1271-3p	0	0	0	0	0	0	0	0	0	0	0	0	0	0	0	0	0	1	0	0	1
hsa-miR-4744	0	1	0	0	0	0	0	0	0	0	0	0	0	0	0	0	0	0	0	0	1
hsa-miR-124-5p	0	0	0	0	1	0	0	0	0	0	0	0	0	0	0	0	0	0	0	0	1
hsa-miR-4804-3p	0	0	0	0	0	0	0	0	0	1	0	0	0	0	0	0	0	0	0	0	1
hsa-miR-5692c	0	0	0	0	0	0	0	1	0	0	0	0	0	0	0	0	0	0	0	0	1
hsa-miR-1273c	0	1	0	0	0	0	0	0	0	0	0	0	0	0	0	0	0	0	0	0	1
hsa-miR-4489	1	0	0	0	0	0	0	0	0	0	0	0	0	0	0	0	0	0	0	0	1
hsa-miR-885-3p	0	0	1	0	0	0	0	0	0	0	0	0	0	0	0	0	0	0	0	0	1
hsa-miR-495-5p	0	0	0	0	0	0	0	0	0	0	0	0	0	0	0	0	0	0	0	1	1
hsa-miR-4676-3p	0	0	0	0	0	1	0	0	0	0	0	0	0	0	0	0	0	0	0	0	1
hsa-miR-517c-3p	0	0	0	0	0	1	0	0	0	0	0	0	0	0	0	0	0	0	0	0	1
hsa-miR-4782-5p	0	0	0	0	0	0	1	0	0	0	0	0	0	0	0	0	0	0	0	0	1
hsa-miR-4520b-5p	0	0	0	0	0	0	0	0	0	1	0	0	0	0	0	0	0	0	0	0	1
hsa-miR-4750-3p	0	0	0	1	0	0	0	0	0	0	0	0	0	0	0	0	0	0	0	0	1
hsa-miR-4665-5p	0	0	0	0	0	0	1	0	0	0	0	0	0	0	0	0	0	0	0	0	1
hsa-miR-548aq-5p	0	0	0	0	0	0	1	0	0	0	0	0	0	0	0	0	0	0	0	0	1
hsa-miR-4662b	0	0	0	0	0	0	0	0	0	0	0	0	0	0	0	0	0	1	0	0	1
hsa-miR-3181	0	1	0	0	0	0	0	0	0	0	0	0	0	0	0	0	0	0	0	0	1
hsa-miR-5687	0	0	0	0	1	0	0	0	0	0	0	0	0	0	0	0	0	0	0	0	1
hsa-miR-3191-3p	0	0	0	1	0	0	0	0	0	0	0	0	0	0	0	0	0	0	0	0	1
hsa-miR-181b-3p	0	0	0	0	1	0	0	0	0	0	0	0	0	0	0	0	0	0	0	0	1
hsa-miR-4632-3p	0	0	0	0	0	0	1	0	0	0	0	0	0	0	0	0	0	0	0	0	1
hsa-miR-4696	1	0	0	0	0	0	0	0	0	0	0	0	0	0	0	0	0	0	0	0	1
hsa-miR-5580-5p	0	0	0	0	0	0	1	0	0	0	0	0	0	0	0	0	0	0	0	0	1
hsa-miR-519a-5p	0	0	0	0	0	1	0	0	0	0	0	0	0	0	0	0	0	0	0	0	1
hsa-miR-376c-5p	0	0	0	0	0	0	0	0	0	0	0	0	0	0	0	0	0	0	0	1	1
hsa-miR-4482-5p	0	0	0	0	0	0	0	0	0	0	0	0	0	0	0	0	0	1	0	0	1
hsa-miR-518f-5p	0	0	0	0	0	0	0	1	0	0	0	0	0	0	0	0	0	0	0	0	1
hsa-miR-4803	0	0	0	0	0	0	1	0	0	0	0	0	0	0	0	0	0	0	0	0	1
hsa-miR-4783-3p	0	0	0	0	0	0	0	1	0	0	0	0	0	0	0	0	0	0	0	0	1
hsa-miR-3120-5p	0	0	0	0	0	0	0	0	0	0	0	0	0	0	1	0	0	0	0	0	1
hsa-miR-632	0	0	0	0	0	1	0	0	0	0	0	0	0	0	0	0	0	0	0	0	1
hsa-miR-3942-3p	0	0	0	0	0	0	1	0	0	0	0	0	0	0	0	0	0	0	0	0	1
hsa-miR-548aq-3p	0	0	0	0	0	1	0	0	0	0	0	0	0	0	0	0	0	0	0	0	1
hsa-miR-548ac	0	0	0	0	0	0	0	0	0	0	0	0	0	0	0	0	0	1	0	0	1
hsa-miR-4526	0	0	0	1	0	0	0	0	0	0	0	0	0	0	0	0	0	0	0	0	1
hsa-miR-3164	0	0	0	0	0	0	0	0	0	0	0	0	0	0	0	0	0	0	1	0	1
hsa-miR-6514-3p	0	0	0	0	0	1	0	0	0	0	0	0	0	0	0	0	0	0	0	0	1
hsa-miR-4646-3p	0	0	0	0	0	0	0	0	0	1	0	0	0	0	0	0	0	0	0	0	1
hsa-miR-3606-5p	0	0	0	0	1	0	0	0	0	0	0	0	0	0	0	0	0	0	0	0	1
hsa-miR-3919	0	0	0	0	0	0	0	0	0	0	0	0	0	0	0	0	0	1	0	0	1
hsa-miR-3619-3p	0	0	0	0	0	0	0	1	0	0	0	0	0	0	0	0	0	0	0	0	1
hsa-miR-6130	0	0	0	0	0	1	0	0	0	0	0	0	0	0	0	0	0	0	0	0	1
hsa-miR-4644	1	0	0	0	0	0	0	0	0	0	0	0	0	0	0	0	0	0	0	0	1
hsa-miR-3134	0	0	0	1	0	0	0	0	0	0	0	0	0	0	0	0	0	0	0	0	1
hsa-miR-5194	0	1	0	0	0	0	0	0	0	0	0	0	0	0	0	0	0	0	0	0	1
hsa-miR-4672	0	0	0	0	0	0	0	0	0	0	0	0	0	0	0	0	0	0	1	0	1
hsa-miR-5585-3p	0	0	0	0	0	0	0	1	0	0	0	0	0	0	0	0	0	0	0	0	1
hsa-miR-1911-3p	0	0	0	0	0	0	0	1	0	0	0	0	0	0	0	0	0	0	0	0	1
hsa-miR-6510-5p	0	1	0	0	0	0	0	0	0	0	0	0	0	0	0	0	0	0	0	0	1
hsa-miR-376b-5p	0	0	0	0	0	0	0	0	0	0	0	0	0	0	0	0	0	0	0	1	1
hsa-miR-524-5p	0	0	0	0	0	0	0	0	0	0	0	0	0	0	0	0	0	1	0	0	1
hsa-miR-550b-3p	0	0	0	0	0	1	0	0	0	0	0	0	0	0	0	0	0	0	0	0	1
hsa-miR-523-5p	0	0	0	0	0	1	0	0	0	0	0	0	0	0	0	0	0	0	0	0	1
hsa-miR-5571-5p	0	0	0	0	0	1	0	0	0	0	0	0	0	0	0	0	0	0	0	0	1
hsa-miR-548as-5p	0	0	0	1	0	0	0	0	0	0	0	0	0	0	0	0	0	0	0	0	1
hsa-miR-642b-5p	0	0	0	0	0	0	0	0	0	0	0	0	0	0	0	0	0	1	0	0	1
hsa-miR-4701-5p	0	0	0	0	0	0	0	0	0	0	0	0	0	0	0	0	0	0	1	0	1
hsa-miR-147a	0	0	0	0	0	1	0	0	0	0	0	0	0	0	0	0	0	0	0	0	1
hsa-miR-3663-3p	0	0	0	0	1	0	0	0	0	0	0	0	0	0	0	0	0	0	0	0	1
hsa-miR-5187-3p	0	0	0	0	0	0	0	0	0	0	0	0	0	0	0	0	0	0	1	0	1
hsa-miR-4522	0	0	0	0	0	0	0	0	0	1	0	0	0	0	0	0	0	0	0	0	1
hsa-miR-767-3p	0	0	0	0	0	0	0	0	0	0	0	0	0	0	0	0	0	0	1	0	1
hsa-miR-4536-3p	0	0	0	0	0	0	1	0	0	0	0	0	0	0	0	0	0	0	0	0	1
hsa-miR-4646-5p	1	0	0	0	0	0	0	0	0	0	0	0	0	0	0	0	0	0	0	0	1
hsa-miR-5190	0	0	0	0	0	0	1	0	0	0	0	0	0	0	0	0	0	0	0	0	1
hsa-miR-3616-5p	0	0	1	0	0	0	0	0	0	0	0	0	0	0	0	0	0	0	0	0	1
hsa-miR-146a-3p	0	0	0	0	1	0	0	0	0	0	0	0	0	0	0	0	0	0	0	0	1
hsa-miR-3187-5p	0	0	0	0	0	0	0	0	0	0	0	0	0	0	0	0	0	0	1	0	1
hsa-miR-520d-3p	0	0	0	0	0	0	0	0	0	1	0	0	0	0	0	0	0	0	0	0	1
hsa-miR-4254	0	0	0	0	0	0	0	0	0	0	0	0	0	0	0	0	0	1	0	0	1
hsa-miR-1295b-5p	1	0	0	0	0	0	0	0	0	0	0	0	0	0	0	0	0	0	0	0	1
hsa-miR-3127-3p	0	0	0	0	0	0	1	0	0	0	0	0	0	0	0	0	0	0	0	0	1
hsa-miR-659-3p	0	0	0	0	0	0	0	0	0	0	0	0	0	0	0	0	0	1	0	0	1
hsa-miR-1225-5p	0	0	0	0	0	0	0	0	0	0	0	0	0	0	0	0	0	1	0	0	1
hsa-miR-6505-3p	0	0	0	0	0	0	0	0	0	0	0	0	0	0	0	0	0	0	1	0	1
hsa-miR-1973	0	0	0	0	0	0	0	0	0	1	0	0	0	0	0	0	0	0	0	0	1
hsa-miR-518c-3p	0	0	0	0	0	0	1	0	0	0	0	0	0	0	0	0	0	0	0	0	1
hsa-miR-519b-5p	0	0	0	0	0	1	0	0	0	0	0	0	0	0	0	0	0	0	0	0	1
hsa-miR-544a	0	0	0	0	0	0	1	0	0	0	0	0	0	0	0	0	0	0	0	0	1
hsa-miR-15a-3p	0	0	0	0	0	0	1	0	0	0	0	0	0	0	0	0	0	0	0	0	1
hsa-miR-519c-5p	0	0	0	0	0	1	0	0	0	0	0	0	0	0	0	0	0	0	0	0	1
hsa-miR-5008-3p	0	0	0	0	1	0	0	0	0	0	0	0	0	0	0	0	0	0	0	0	1
hsa-miR-5693	0	1	0	0	0	0	0	0	0	0	0	0	0	0	0	0	0	0	0	0	1
hsa-miR-4749-3p	1	0	0	0	0	0	0	0	0	0	0	0	0	0	0	0	0	0	0	0	1
hsa-miR-5197-3p	0	0	0	0	0	0	0	0	0	0	0	0	0	0	0	0	0	0	0	0	0
hsa-miR-557	0	0	0	0	0	0	0	0	0	0	0	0	0	0	0	0	0	0	0	0	0
hsa-miR-548av-5p	0	0	0	0	0	0	0	0	0	0	0	0	0	0	0	0	0	0	0	0	0
hsa-miR-518d-5p	0	0	0	0	0	0	0	0	0	0	0	0	0	0	0	0	0	0	0	0	0
hsa-miR-637	0	0	0	0	0	0	0	0	0	0	0	0	0	0	0	0	0	0	0	0	0
hsa-miR-4493	0	0	0	0	0	0	0	0	0	0	0	0	0	0	0	0	0	0	0	0	0
hsa-miR-520b	0	0	0	0	0	0	0	0	0	0	0	0	0	0	0	0	0	0	0	0	0
hsa-miR-518a-3p	0	0	0	0	0	0	0	0	0	0	0	0	0	0	0	0	0	0	0	0	0
hsa-miR-645	0	0	0	0	0	0	0	0	0	0	0	0	0	0	0	0	0	0	0	0	0
hsa-miR-3975	0	0	0	0	0	0	0	0	0	0	0	0	0	0	0	0	0	0	0	0	0
hsa-miR-4524b-3p	0	0	0	0	0	0	0	0	0	0	0	0	0	0	0	0	0	0	0	0	0
hsa-miR-448	0	0	0	0	0	0	0	0	0	0	0	0	0	0	0	0	0	0	0	0	0
hsa-miR-2909	0	0	0	0	0	0	0	0	0	0	0	0	0	0	0	0	0	0	0	0	0
hsa-miR-302b-3p	0	0	0	0	0	0	0	0	0	0	0	0	0	0	0	0	0	0	0	0	0
hsa-miR-3140-5p	0	0	0	0	0	0	0	0	0	0	0	0	0	0	0	0	0	0	0	0	0
hsa-miR-3680-5p	0	0	0	0	0	0	0	0	0	0	0	0	0	0	0	0	0	0	0	0	0
hsa-miR-6506-3p	0	0	0	0	0	0	0	0	0	0	0	0	0	0	0	0	0	0	0	0	0
hsa-miR-3682-5p	0	0	0	0	0	0	0	0	0	0	0	0	0	0	0	0	0	0	0	0	0
hsa-miR-3977	0	0	0	0	0	0	0	0	0	0	0	0	0	0	0	0	0	0	0	0	0
hsa-miR-648	0	0	0	0	0	0	0	0	0	0	0	0	0	0	0	0	0	0	0	0	0
hsa-miR-367-5p	0	0	0	0	0	0	0	0	0	0	0	0	0	0	0	0	0	0	0	0	0
hsa-miR-562	0	0	0	0	0	0	0	0	0	0	0	0	0	0	0	0	0	0	0	0	0
hsa-miR-4328	0	0	0	0	0	0	0	0	0	0	0	0	0	0	0	0	0	0	0	0	0
hsa-miR-6515-3p	0	0	0	0	0	0	0	0	0	0	0	0	0	0	0	0	0	0	0	0	0
hsa-miR-4314	0	0	0	0	0	0	0	0	0	0	0	0	0	0	0	0	0	0	0	0	0
hsa-miR-3681-3p	0	0	0	0	0	0	0	0	0	0	0	0	0	0	0	0	0	0	0	0	0
hsa-miR-6499-3p	0	0	0	0	0	0	0	0	0	0	0	0	0	0	0	0	0	0	0	0	0
hsa-miR-5692a	0	0	0	0	0	0	0	0	0	0	0	0	0	0	0	0	0	0	0	0	0
hsa-miR-519b-3p	0	0	0	0	0	0	0	0	0	0	0	0	0	0	0	0	0	0	0	0	0
hsa-miR-513b	0	0	0	0	0	0	0	0	0	0	0	0	0	0	0	0	0	0	0	0	0
hsa-miR-3195	0	0	0	0	0	0	0	0	0	0	0	0	0	0	0	0	0	0	0	0	0
hsa-miR-4486	0	0	0	0	0	0	0	0	0	0	0	0	0	0	0	0	0	0	0	0	0
hsa-miR-4534	0	0	0	0	0	0	0	0	0	0	0	0	0	0	0	0	0	0	0	0	0
hsa-miR-563	0	0	0	0	0	0	0	0	0	0	0	0	0	0	0	0	0	0	0	0	0
hsa-miR-892c-5p	0	0	0	0	0	0	0	0	0	0	0	0	0	0	0	0	0	0	0	0	0
hsa-miR-3672	0	0	0	0	0	0	0	0	0	0	0	0	0	0	0	0	0	0	0	0	0
hsa-miR-4488	0	0	0	0	0	0	0	0	0	0	0	0	0	0	0	0	0	0	0	0	0
hsa-miR-3688-5p	0	0	0	0	0	0	0	0	0	0	0	0	0	0	0	0	0	0	0	0	0
hsa-miR-4747-5p	0	0	0	0	0	0	0	0	0	0	0	0	0	0	0	0	0	0	0	0	0
hsa-miR-3122	0	0	0	0	0	0	0	0	0	0	0	0	0	0	0	0	0	0	0	0	0
hsa-miR-4274	0	0	0	0	0	0	0	0	0	0	0	0	0	0	0	0	0	0	0	0	0
hsa-miR-4465	0	0	0	0	0	0	0	0	0	0	0	0	0	0	0	0	0	0	0	0	0
hsa-miR-548ar-3p	0	0	0	0	0	0	0	0	0	0	0	0	0	0	0	0	0	0	0	0	0
hsa-miR-4690-3p	0	0	0	0	0	0	0	0	0	0	0	0	0	0	0	0	0	0	0	0	0
hsa-miR-4684-5p	0	0	0	0	0	0	0	0	0	0	0	0	0	0	0	0	0	0	0	0	0
hsa-miR-4300	0	0	0	0	0	0	0	0	0	0	0	0	0	0	0	0	0	0	0	0	0
hsa-miR-4650-3p	0	0	0	0	0	0	0	0	0	0	0	0	0	0	0	0	0	0	0	0	0
hsa-miR-920	0	0	0	0	0	0	0	0	0	0	0	0	0	0	0	0	0	0	0	0	0
hsa-miR-516a-3p	0	0	0	0	0	0	0	0	0	0	0	0	0	0	0	0	0	0	0	0	0
hsa-miR-4513	0	0	0	0	0	0	0	0	0	0	0	0	0	0	0	0	0	0	0	0	0
hsa-miR-4793-3p	0	0	0	0	0	0	0	0	0	0	0	0	0	0	0	0	0	0	0	0	0
hsa-miR-593-3p	0	0	0	0	0	0	0	0	0	0	0	0	0	0	0	0	0	0	0	0	0
hsa-miR-575	0	0	0	0	0	0	0	0	0	0	0	0	0	0	0	0	0	0	0	0	0
hsa-miR-661	0	0	0	0	0	0	0	0	0	0	0	0	0	0	0	0	0	0	0	0	0
hsa-miR-3162-3p	0	0	0	0	0	0	0	0	0	0	0	0	0	0	0	0	0	0	0	0	0
hsa-miR-4722-5p	0	0	0	0	0	0	0	0	0	0	0	0	0	0	0	0	0	0	0	0	0
hsa-miR-499b-3p	0	0	0	0	0	0	0	0	0	0	0	0	0	0	0	0	0	0	0	0	0
hsa-miR-5186	0	0	0	0	0	0	0	0	0	0	0	0	0	0	0	0	0	0	0	0	0
hsa-miR-3618	0	0	0	0	0	0	0	0	0	0	0	0	0	0	0	0	0	0	0	0	0
hsa-miR-1238-5p	0	0	0	0	0	0	0	0	0	0	0	0	0	0	0	0	0	0	0	0	0
hsa-miR-5196-5p	0	0	0	0	0	0	0	0	0	0	0	0	0	0	0	0	0	0	0	0	0
hsa-miR-6078	0	0	0	0	0	0	0	0	0	0	0	0	0	0	0	0	0	0	0	0	0
hsa-miR-4302	0	0	0	0	0	0	0	0	0	0	0	0	0	0	0	0	0	0	0	0	0
hsa-miR-4735-3p	0	0	0	0	0	0	0	0	0	0	0	0	0	0	0	0	0	0	0	0	0
hsa-miR-4436a	0	0	0	0	0	0	0	0	0	0	0	0	0	0	0	0	0	0	0	0	0
hsa-miR-4634	0	0	0	0	0	0	0	0	0	0	0	0	0	0	0	0	0	0	0	0	0
hsa-miR-4525	0	0	0	0	0	0	0	0	0	0	0	0	0	0	0	0	0	0	0	0	0
hsa-miR-302c-5p	0	0	0	0	0	0	0	0	0	0	0	0	0	0	0	0	0	0	0	0	0
hsa-miR-5583-5p	0	0	0	0	0	0	0	0	0	0	0	0	0	0	0	0	0	0	0	0	0
hsa-miR-507	0	0	0	0	0	0	0	0	0	0	0	0	0	0	0	0	0	0	0	0	0
hsa-miR-4765	0	0	0	0	0	0	0	0	0	0	0	0	0	0	0	0	0	0	0	0	0
hsa-miR-3171	0	0	0	0	0	0	0	0	0	0	0	0	0	0	0	0	0	0	0	0	0
hsa-miR-3908	0	0	0	0	0	0	0	0	0	0	0	0	0	0	0	0	0	0	0	0	0
hsa-miR-4761-5p	0	0	0	0	0	0	0	0	0	0	0	0	0	0	0	0	0	0	0	0	0
hsa-miR-3689d	0	0	0	0	0	0	0	0	0	0	0	0	0	0	0	0	0	0	0	0	0
hsa-miR-4257	0	0	0	0	0	0	0	0	0	0	0	0	0	0	0	0	0	0	0	0	0
hsa-miR-4264	0	0	0	0	0	0	0	0	0	0	0	0	0	0	0	0	0	0	0	0	0
hsa-miR-5584-5p	0	0	0	0	0	0	0	0	0	0	0	0	0	0	0	0	0	0	0	0	0
hsa-miR-6088	0	0	0	0	0	0	0	0	0	0	0	0	0	0	0	0	0	0	0	0	0
hsa-miR-4710	0	0	0	0	0	0	0	0	0	0	0	0	0	0	0	0	0	0	0	0	0
hsa-miR-302e	0	0	0	0	0	0	0	0	0	0	0	0	0	0	0	0	0	0	0	0	0
hsa-miR-4715-3p	0	0	0	0	0	0	0	0	0	0	0	0	0	0	0	0	0	0	0	0	0
hsa-miR-1282	0	0	0	0	0	0	0	0	0	0	0	0	0	0	0	0	0	0	0	0	0
hsa-miR-5590-5p	0	0	0	0	0	0	0	0	0	0	0	0	0	0	0	0	0	0	0	0	0
hsa-miR-3186-3p	0	0	0	0	0	0	0	0	0	0	0	0	0	0	0	0	0	0	0	0	0
hsa-miR-1915-3p	0	0	0	0	0	0	0	0	0	0	0	0	0	0	0	0	0	0	0	0	0
hsa-miR-544b	0	0	0	0	0	0	0	0	0	0	0	0	0	0	0	0	0	0	0	0	0
hsa-miR-603	0	0	0	0	0	0	0	0	0	0	0	0	0	0	0	0	0	0	0	0	0
hsa-miR-4505	0	0	0	0	0	0	0	0	0	0	0	0	0	0	0	0	0	0	0	0	0
hsa-miR-4633-3p	0	0	0	0	0	0	0	0	0	0	0	0	0	0	0	0	0	0	0	0	0
hsa-miR-4694-5p	0	0	0	0	0	0	0	0	0	0	0	0	0	0	0	0	0	0	0	0	0
hsa-miR-4777-5p	0	0	0	0	0	0	0	0	0	0	0	0	0	0	0	0	0	0	0	0	0
hsa-miR-938	0	0	0	0	0	0	0	0	0	0	0	0	0	0	0	0	0	0	0	0	0
hsa-miR-23a-5p	0	0	0	0	0	0	0	0	0	0	0	0	0	0	0	0	0	0	0	0	0
hsa-miR-5587-5p	0	0	0	0	0	0	0	0	0	0	0	0	0	0	0	0	0	0	0	0	0
hsa-miR-298	0	0	0	0	0	0	0	0	0	0	0	0	0	0	0	0	0	0	0	0	0
hsa-miR-105-3p	0	0	0	0	0	0	0	0	0	0	0	0	0	0	0	0	0	0	0	0	0
hsa-miR-4255	0	0	0	0	0	0	0	0	0	0	0	0	0	0	0	0	0	0	0	0	0
hsa-miR-4455	0	0	0	0	0	0	0	0	0	0	0	0	0	0	0	0	0	0	0	0	0
hsa-miR-3682-3p	0	0	0	0	0	0	0	0	0	0	0	0	0	0	0	0	0	0	0	0	0
hsa-miR-1207-5p	0	0	0	0	0	0	0	0	0	0	0	0	0	0	0	0	0	0	0	0	0
hsa-miR-4438	0	0	0	0	0	0	0	0	0	0	0	0	0	0	0	0	0	0	0	0	0
hsa-miR-3189-3p	0	0	0	0	0	0	0	0	0	0	0	0	0	0	0	0	0	0	0	0	0
hsa-miR-302b-5p	0	0	0	0	0	0	0	0	0	0	0	0	0	0	0	0	0	0	0	0	0
hsa-miR-623	0	0	0	0	0	0	0	0	0	0	0	0	0	0	0	0	0	0	0	0	0
hsa-miR-875-3p	0	0	0	0	0	0	0	0	0	0	0	0	0	0	0	0	0	0	0	0	0
hsa-miR-657	0	0	0	0	0	0	0	0	0	0	0	0	0	0	0	0	0	0	0	0	0
hsa-miR-939-3p	0	0	0	0	0	0	0	0	0	0	0	0	0	0	0	0	0	0	0	0	0
hsa-miR-519a-3p	0	0	0	0	0	0	0	0	0	0	0	0	0	0	0	0	0	0	0	0	0
hsa-miR-630	0	0	0	0	0	0	0	0	0	0	0	0	0	0	0	0	0	0	0	0	0
hsa-miR-4739	0	0	0	0	0	0	0	0	0	0	0	0	0	0	0	0	0	0	0	0	0
hsa-miR-600	0	0	0	0	0	0	0	0	0	0	0	0	0	0	0	0	0	0	0	0	0
hsa-miR-3135b	0	0	0	0	0	0	0	0	0	0	0	0	0	0	0	0	0	0	0	0	0
hsa-miR-371a-3p	0	0	0	0	0	0	0	0	0	0	0	0	0	0	0	0	0	0	0	0	0
hsa-miR-4268	0	0	0	0	0	0	0	0	0	0	0	0	0	0	0	0	0	0	0	0	0
hsa-miR-3145-5p	0	0	0	0	0	0	0	0	0	0	0	0	0	0	0	0	0	0	0	0	0
hsa-miR-621	0	0	0	0	0	0	0	0	0	0	0	0	0	0	0	0	0	0	0	0	0
hsa-miR-4664-5p	0	0	0	0	0	0	0	0	0	0	0	0	0	0	0	0	0	0	0	0	0
hsa-miR-3692-3p	0	0	0	0	0	0	0	0	0	0	0	0	0	0	0	0	0	0	0	0	0
hsa-miR-1470	0	0	0	0	0	0	0	0	0	0	0	0	0	0	0	0	0	0	0	0	0
hsa-miR-4419b	0	0	0	0	0	0	0	0	0	0	0	0	0	0	0	0	0	0	0	0	0
hsa-miR-4291	0	0	0	0	0	0	0	0	0	0	0	0	0	0	0	0	0	0	0	0	0
hsa-miR-211-3p	0	0	0	0	0	0	0	0	0	0	0	0	0	0	0	0	0	0	0	0	0
hsa-miR-4445-3p	0	0	0	0	0	0	0	0	0	0	0	0	0	0	0	0	0	0	0	0	0
hsa-miR-5579-5p	0	0	0	0	0	0	0	0	0	0	0	0	0	0	0	0	0	0	0	0	0
hsa-miR-593-5p	0	0	0	0	0	0	0	0	0	0	0	0	0	0	0	0	0	0	0	0	0
hsa-miR-3689a-5p	0	0	0	0	0	0	0	0	0	0	0	0	0	0	0	0	0	0	0	0	0
hsa-miR-6504-3p	0	0	0	0	0	0	0	0	0	0	0	0	0	0	0	0	0	0	0	0	0
hsa-miR-4282	0	0	0	0	0	0	0	0	0	0	0	0	0	0	0	0	0	0	0	0	0
hsa-miR-4721	0	0	0	0	0	0	0	0	0	0	0	0	0	0	0	0	0	0	0	0	0
hsa-miR-3670	0	0	0	0	0	0	0	0	0	0	0	0	0	0	0	0	0	0	0	0	0
hsa-miR-3925-3p	0	0	0	0	0	0	0	0	0	0	0	0	0	0	0	0	0	0	0	0	0
hsa-miR-4652-3p	0	0	0	0	0	0	0	0	0	0	0	0	0	0	0	0	0	0	0	0	0
hsa-miR-644a	0	0	0	0	0	0	0	0	0	0	0	0	0	0	0	0	0	0	0	0	0
hsa-miR-3689a-3p	0	0	0	0	0	0	0	0	0	0	0	0	0	0	0	0	0	0	0	0	0
hsa-miR-3153	0	0	0	0	0	0	0	0	0	0	0	0	0	0	0	0	0	0	0	0	0
hsa-miR-4312	0	0	0	0	0	0	0	0	0	0	0	0	0	0	0	0	0	0	0	0	0
hsa-miR-4316	0	0	0	0	0	0	0	0	0	0	0	0	0	0	0	0	0	0	0	0	0
hsa-miR-5006-5p	0	0	0	0	0	0	0	0	0	0	0	0	0	0	0	0	0	0	0	0	0
hsa-miR-4717-5p	0	0	0	0	0	0	0	0	0	0	0	0	0	0	0	0	0	0	0	0	0
hsa-miR-4711-3p	0	0	0	0	0	0	0	0	0	0	0	0	0	0	0	0	0	0	0	0	0
hsa-miR-3678-3p	0	0	0	0	0	0	0	0	0	0	0	0	0	0	0	0	0	0	0	0	0
hsa-miR-3591-3p	0	0	0	0	0	0	0	0	0	0	0	0	0	0	0	0	0	0	0	0	0
hsa-miR-4706	0	0	0	0	0	0	0	0	0	0	0	0	0	0	0	0	0	0	0	0	0
hsa-miR-4432	0	0	0	0	0	0	0	0	0	0	0	0	0	0	0	0	0	0	0	0	0
hsa-miR-5000-5p	0	0	0	0	0	0	0	0	0	0	0	0	0	0	0	0	0	0	0	0	0
hsa-miR-4297	0	0	0	0	0	0	0	0	0	0	0	0	0	0	0	0	0	0	0	0	0
hsa-miR-4457	0	0	0	0	0	0	0	0	0	0	0	0	0	0	0	0	0	0	0	0	0
hsa-miR-3680-3p	0	0	0	0	0	0	0	0	0	0	0	0	0	0	0	0	0	0	0	0	0
hsa-miR-2392	0	0	0	0	0	0	0	0	0	0	0	0	0	0	0	0	0	0	0	0	0
hsa-miR-2682-3p	0	0	0	0	0	0	0	0	0	0	0	0	0	0	0	0	0	0	0	0	0
hsa-miR-5011-3p	0	0	0	0	0	0	0	0	0	0	0	0	0	0	0	0	0	0	0	0	0
hsa-miR-4431	0	0	0	0	0	0	0	0	0	0	0	0	0	0	0	0	0	0	0	0	0
hsa-miR-4418	0	0	0	0	0	0	0	0	0	0	0	0	0	0	0	0	0	0	0	0	0
hsa-miR-3119	0	0	0	0	0	0	0	0	0	0	0	0	0	0	0	0	0	0	0	0	0
hsa-miR-3606-3p	0	0	0	0	0	0	0	0	0	0	0	0	0	0	0	0	0	0	0	0	0
hsa-miR-569	0	0	0	0	0	0	0	0	0	0	0	0	0	0	0	0	0	0	0	0	0
hsa-miR-4712-5p	0	0	0	0	0	0	0	0	0	0	0	0	0	0	0	0	0	0	0	0	0
hsa-miR-4680-5p	0	0	0	0	0	0	0	0	0	0	0	0	0	0	0	0	0	0	0	0	0
hsa-miR-4740-3p	0	0	0	0	0	0	0	0	0	0	0	0	0	0	0	0	0	0	0	0	0
hsa-miR-1914-3p	0	0	0	0	0	0	0	0	0	0	0	0	0	0	0	0	0	0	0	0	0
hsa-miR-518b	0	0	0	0	0	0	0	0	0	0	0	0	0	0	0	0	0	0	0	0	0
hsa-miR-3676-5p	0	0	0	0	0	0	0	0	0	0	0	0	0	0	0	0	0	0	0	0	0
hsa-miR-4758-5p	0	0	0	0	0	0	0	0	0	0	0	0	0	0	0	0	0	0	0	0	0
hsa-miR-6069	0	0	0	0	0	0	0	0	0	0	0	0	0	0	0	0	0	0	0	0	0
hsa-miR-6715a-3p	0	0	0	0	0	0	0	0	0	0	0	0	0	0	0	0	0	0	0	0	0
hsa-miR-573	0	0	0	0	0	0	0	0	0	0	0	0	0	0	0	0	0	0	0	0	0
hsa-miR-1236-3p	0	0	0	0	0	0	0	0	0	0	0	0	0	0	0	0	0	0	0	0	0
hsa-miR-4276	0	0	0	0	0	0	0	0	0	0	0	0	0	0	0	0	0	0	0	0	0
hsa-miR-4680-3p	0	0	0	0	0	0	0	0	0	0	0	0	0	0	0	0	0	0	0	0	0
hsa-miR-4783-5p	0	0	0	0	0	0	0	0	0	0	0	0	0	0	0	0	0	0	0	0	0
hsa-miR-3686	0	0	0	0	0	0	0	0	0	0	0	0	0	0	0	0	0	0	0	0	0
hsa-miR-4645-5p	0	0	0	0	0	0	0	0	0	0	0	0	0	0	0	0	0	0	0	0	0
hsa-miR-4720-3p	0	0	0	0	0	0	0	0	0	0	0	0	0	0	0	0	0	0	0	0	0
hsa-miR-3655	0	0	0	0	0	0	0	0	0	0	0	0	0	0	0	0	0	0	0	0	0
hsa-miR-1202	0	0	0	0	0	0	0	0	0	0	0	0	0	0	0	0	0	0	0	0	0
hsa-miR-4304	0	0	0	0	0	0	0	0	0	0	0	0	0	0	0	0	0	0	0	0	0
hsa-miR-3658	0	0	0	0	0	0	0	0	0	0	0	0	0	0	0	0	0	0	0	0	0
hsa-miR-519e-5p	0	0	0	0	0	0	0	0	0	0	0	0	0	0	0	0	0	0	0	0	0
hsa-miR-6128	0	0	0	0	0	0	0	0	0	0	0	0	0	0	0	0	0	0	0	0	0
hsa-miR-550b-2-5p	0	0	0	0	0	0	0	0	0	0	0	0	0	0	0	0	0	0	0	0	0
hsa-miR-4527	0	0	0	0	0	0	0	0	0	0	0	0	0	0	0	0	0	0	0	0	0
hsa-miR-2117	0	0	0	0	0	0	0	0	0	0	0	0	0	0	0	0	0	0	0	0	0
hsa-miR-5589-5p	0	0	0	0	0	0	0	0	0	0	0	0	0	0	0	0	0	0	0	0	0
hsa-miR-3692-5p	0	0	0	0	0	0	0	0	0	0	0	0	0	0	0	0	0	0	0	0	0
hsa-miR-4263	0	0	0	0	0	0	0	0	0	0	0	0	0	0	0	0	0	0	0	0	0
hsa-miR-635	0	0	0	0	0	0	0	0	0	0	0	0	0	0	0	0	0	0	0	0	0
hsa-miR-4632-5p	0	0	0	0	0	0	0	0	0	0	0	0	0	0	0	0	0	0	0	0	0
hsa-miR-4673	0	0	0	0	0	0	0	0	0	0	0	0	0	0	0	0	0	0	0	0	0
hsa-miR-1200	0	0	0	0	0	0	0	0	0	0	0	0	0	0	0	0	0	0	0	0	0
hsa-miR-6075	0	0	0	0	0	0	0	0	0	0	0	0	0	0	0	0	0	0	0	0	0
hsa-miR-4759	0	0	0	0	0	0	0	0	0	0	0	0	0	0	0	0	0	0	0	0	0
hsa-miR-4484	0	0	0	0	0	0	0	0	0	0	0	0	0	0	0	0	0	0	0	0	0
hsa-miR-3169	0	0	0	0	0	0	0	0	0	0	0	0	0	0	0	0	0	0	0	0	0
hsa-miR-520f	0	0	0	0	0	0	0	0	0	0	0	0	0	0	0	0	0	0	0	0	0
hsa-miR-4756-3p	0	0	0	0	0	0	0	0	0	0	0	0	0	0	0	0	0	0	0	0	0
hsa-miR-3162-5p	0	0	0	0	0	0	0	0	0	0	0	0	0	0	0	0	0	0	0	0	0
hsa-miR-5739	0	0	0	0	0	0	0	0	0	0	0	0	0	0	0	0	0	0	0	0	0
hsa-miR-4728-5p	0	0	0	0	0	0	0	0	0	0	0	0	0	0	0	0	0	0	0	0	0
hsa-miR-4539	0	0	0	0	0	0	0	0	0	0	0	0	0	0	0	0	0	0	0	0	0
hsa-miR-323b-5p	0	0	0	0	0	0	0	0	0	0	0	0	0	0	0	0	0	0	0	0	0
hsa-miR-520c-3p	0	0	0	0	0	0	0	0	0	0	0	0	0	0	0	0	0	0	0	0	0
hsa-miR-518a-5p	0	0	0	0	0	0	0	0	0	0	0	0	0	0	0	0	0	0	0	0	0
hsa-miR-4310	0	0	0	0	0	0	0	0	0	0	0	0	0	0	0	0	0	0	0	0	0
hsa-miR-608	0	0	0	0	0	0	0	0	0	0	0	0	0	0	0	0	0	0	0	0	0
hsa-miR-5591-5p	0	0	0	0	0	0	0	0	0	0	0	0	0	0	0	0	0	0	0	0	0
hsa-miR-4277	0	0	0	0	0	0	0	0	0	0	0	0	0	0	0	0	0	0	0	0	0
hsa-miR-3621	0	0	0	0	0	0	0	0	0	0	0	0	0	0	0	0	0	0	0	0	0
hsa-miR-4722-3p	0	0	0	0	0	0	0	0	0	0	0	0	0	0	0	0	0	0	0	0	0
hsa-miR-4764-3p	0	0	0	0	0	0	0	0	0	0	0	0	0	0	0	0	0	0	0	0	0
hsa-miR-4496	0	0	0	0	0	0	0	0	0	0	0	0	0	0	0	0	0	0	0	0	0
hsa-miR-4698	0	0	0	0	0	0	0	0	0	0	0	0	0	0	0	0	0	0	0	0	0
hsa-miR-548ae	0	0	0	0	0	0	0	0	0	0	0	0	0	0	0	0	0	0	0	0	0
hsa-miR-4292	0	0	0	0	0	0	0	0	0	0	0	0	0	0	0	0	0	0	0	0	0
hsa-miR-384	0	0	0	0	0	0	0	0	0	0	0	0	0	0	0	0	0	0	0	0	0
hsa-miR-4650-5p	0	0	0	0	0	0	0	0	0	0	0	0	0	0	0	0	0	0	0	0	0
hsa-miR-4802-5p	0	0	0	0	0	0	0	0	0	0	0	0	0	0	0	0	0	0	0	0	0
hsa-miR-1233-1-5p	0	0	0	0	0	0	0	0	0	0	0	0	0	0	0	0	0	0	0	0	0
hsa-miR-4253	0	0	0	0	0	0	0	0	0	0	0	0	0	0	0	0	0	0	0	0	0
hsa-miR-6090	0	0	0	0	0	0	0	0	0	0	0	0	0	0	0	0	0	0	0	0	0
hsa-miR-5004-3p	0	0	0	0	0	0	0	0	0	0	0	0	0	0	0	0	0	0	0	0	0
hsa-miR-4655-5p	0	0	0	0	0	0	0	0	0	0	0	0	0	0	0	0	0	0	0	0	0
hsa-miR-718	0	0	0	0	0	0	0	0	0	0	0	0	0	0	0	0	0	0	0	0	0
hsa-miR-4718	0	0	0	0	0	0	0	0	0	0	0	0	0	0	0	0	0	0	0	0	0
hsa-miR-325	0	0	0	0	0	0	0	0	0	0	0	0	0	0	0	0	0	0	0	0	0
hsa-miR-5195-5p	0	0	0	0	0	0	0	0	0	0	0	0	0	0	0	0	0	0	0	0	0
hsa-miR-4280	0	0	0	0	0	0	0	0	0	0	0	0	0	0	0	0	0	0	0	0	0
hsa-miR-3713	0	0	0	0	0	0	0	0	0	0	0	0	0	0	0	0	0	0	0	0	0
hsa-miR-4774-3p	0	0	0	0	0	0	0	0	0	0	0	0	0	0	0	0	0	0	0	0	0
hsa-miR-3168	0	0	0	0	0	0	0	0	0	0	0	0	0	0	0	0	0	0	0	0	0
hsa-miR-4323	0	0	0	0	0	0	0	0	0	0	0	0	0	0	0	0	0	0	0	0	0
hsa-miR-516b-3p	0	0	0	0	0	0	0	0	0	0	0	0	0	0	0	0	0	0	0	0	0
hsa-miR-302a-3p	0	0	0	0	0	0	0	0	0	0	0	0	0	0	0	0	0	0	0	0	0
hsa-miR-4299	0	0	0	0	0	0	0	0	0	0	0	0	0	0	0	0	0	0	0	0	0
hsa-miR-3972	0	0	0	0	0	0	0	0	0	0	0	0	0	0	0	0	0	0	0	0	0
hsa-miR-5197-5p	0	0	0	0	0	0	0	0	0	0	0	0	0	0	0	0	0	0	0	0	0
hsa-miR-3960	0	0	0	0	0	0	0	0	0	0	0	0	0	0	0	0	0	0	0	0	0
hsa-miR-4303	0	0	0	0	0	0	0	0	0	0	0	0	0	0	0	0	0	0	0	0	0
hsa-miR-610	0	0	0	0	0	0	0	0	0	0	0	0	0	0	0	0	0	0	0	0	0
hsa-miR-3132	0	0	0	0	0	0	0	0	0	0	0	0	0	0	0	0	0	0	0	0	0
hsa-miR-4760-5p	0	0	0	0	0	0	0	0	0	0	0	0	0	0	0	0	0	0	0	0	0
hsa-miR-5692b	0	0	0	0	0	0	0	0	0	0	0	0	0	0	0	0	0	0	0	0	0
hsa-miR-3924	0	0	0	0	0	0	0	0	0	0	0	0	0	0	0	0	0	0	0	0	0
hsa-miR-518f-3p	0	0	0	0	0	0	0	0	0	0	0	0	0	0	0	0	0	0	0	0	0
hsa-miR-4503	0	0	0	0	0	0	0	0	0	0	0	0	0	0	0	0	0	0	0	0	0
hsa-miR-762	0	0	0	0	0	0	0	0	0	0	0	0	0	0	0	0	0	0	0	0	0
hsa-miR-4999-3p	0	0	0	0	0	0	0	0	0	0	0	0	0	0	0	0	0	0	0	0	0
hsa-miR-3689c	0	0	0	0	0	0	0	0	0	0	0	0	0	0	0	0	0	0	0	0	0
hsa-miR-4420	0	0	0	0	0	0	0	0	0	0	0	0	0	0	0	0	0	0	0	0	0
hsa-miR-4315	0	0	0	0	0	0	0	0	0	0	0	0	0	0	0	0	0	0	0	0	0
hsa-miR-3142	0	0	0	0	0	0	0	0	0	0	0	0	0	0	0	0	0	0	0	0	0
hsa-miR-4259	0	0	0	0	0	0	0	0	0	0	0	0	0	0	0	0	0	0	0	0	0
hsa-miR-566	0	0	0	0	0	0	0	0	0	0	0	0	0	0	0	0	0	0	0	0	0
hsa-miR-554	0	0	0	0	0	0	0	0	0	0	0	0	0	0	0	0	0	0	0	0	0
hsa-miR-4778-3p	0	0	0	0	0	0	0	0	0	0	0	0	0	0	0	0	0	0	0	0	0
hsa-miR-4659a-5p	0	0	0	0	0	0	0	0	0	0	0	0	0	0	0	0	0	0	0	0	0
hsa-miR-4261	0	0	0	0	0	0	0	0	0	0	0	0	0	0	0	0	0	0	0	0	0
hsa-miR-4724-3p	0	0	0	0	0	0	0	0	0	0	0	0	0	0	0	0	0	0	0	0	0
hsa-miR-4697-5p	0	0	0	0	0	0	0	0	0	0	0	0	0	0	0	0	0	0	0	0	0
hsa-miR-6512-3p	0	0	0	0	0	0	0	0	0	0	0	0	0	0	0	0	0	0	0	0	0
hsa-miR-6073	0	0	0	0	0	0	0	0	0	0	0	0	0	0	0	0	0	0	0	0	0
hsa-miR-4429	0	0	0	0	0	0	0	0	0	0	0	0	0	0	0	0	0	0	0	0	0
hsa-miR-1257	0	0	0	0	0	0	0	0	0	0	0	0	0	0	0	0	0	0	0	0	0
hsa-miR-3646	0	0	0	0	0	0	0	0	0	0	0	0	0	0	0	0	0	0	0	0	0
hsa-miR-6085	0	0	0	0	0	0	0	0	0	0	0	0	0	0	0	0	0	0	0	0	0
hsa-miR-4459	0	0	0	0	0	0	0	0	0	0	0	0	0	0	0	0	0	0	0	0	0
hsa-miR-412	0	0	0	0	0	0	0	0	0	0	0	0	0	0	0	0	0	0	0	0	0
hsa-miR-3650	0	0	0	0	0	0	0	0	0	0	0	0	0	0	0	0	0	0	0	0	0
hsa-miR-4798-3p	0	0	0	0	0	0	0	0	0	0	0	0	0	0	0	0	0	0	0	0	0
hsa-miR-634	0	0	0	0	0	0	0	0	0	0	0	0	0	0	0	0	0	0	0	0	0
hsa-miR-4789-5p	0	0	0	0	0	0	0	0	0	0	0	0	0	0	0	0	0	0	0	0	0
hsa-miR-4686	0	0	0	0	0	0	0	0	0	0	0	0	0	0	0	0	0	0	0	0	0
hsa-miR-3663-5p	0	0	0	0	0	0	0	0	0	0	0	0	0	0	0	0	0	0	0	0	0
hsa-miR-567	0	0	0	0	0	0	0	0	0	0	0	0	0	0	0	0	0	0	0	0	0
hsa-miR-572	0	0	0	0	0	0	0	0	0	0	0	0	0	0	0	0	0	0	0	0	0
hsa-miR-4659b-5p	0	0	0	0	0	0	0	0	0	0	0	0	0	0	0	0	0	0	0	0	0
hsa-miR-4524b-5p	0	0	0	0	0	0	0	0	0	0	0	0	0	0	0	0	0	0	0	0	0
hsa-miR-4478	0	0	0	0	0	0	0	0	0	0	0	0	0	0	0	0	0	0	0	0	0
hsa-miR-2052	0	0	0	0	0	0	0	0	0	0	0	0	0	0	0	0	0	0	0	0	0
hsa-miR-4307	0	0	0	0	0	0	0	0	0	0	0	0	0	0	0	0	0	0	0	0	0
hsa-miR-6081	0	0	0	0	0	0	0	0	0	0	0	0	0	0	0	0	0	0	0	0	0
hsa-miR-4795-5p	0	0	0	0	0	0	0	0	0	0	0	0	0	0	0	0	0	0	0	0	0
hsa-miR-5047	0	0	0	0	0	0	0	0	0	0	0	0	0	0	0	0	0	0	0	0	0
hsa-miR-548ap-3p	0	0	0	0	0	0	0	0	0	0	0	0	0	0	0	0	0	0	0	0	0
hsa-miR-571	0	0	0	0	0	0	0	0	0	0	0	0	0	0	0	0	0	0	0	0	0
hsa-miR-492	0	0	0	0	0	0	0	0	0	0	0	0	0	0	0	0	0	0	0	0	0
hsa-miR-1237-3p	0	0	0	0	0	0	0	0	0	0	0	0	0	0	0	0	0	0	0	0	0
hsa-miR-3151	0	0	0	0	0	0	0	0	0	0	0	0	0	0	0	0	0	0	0	0	0
hsa-miR-155-3p	0	0	0	0	0	0	0	0	0	0	0	0	0	0	0	0	0	0	0	0	0
hsa-miR-526a	0	0	0	0	0	0	0	0	0	0	0	0	0	0	0	0	0	0	0	0	0
hsa-miR-4476	0	0	0	0	0	0	0	0	0	0	0	0	0	0	0	0	0	0	0	0	0
hsa-miR-4472	0	0	0	0	0	0	0	0	0	0	0	0	0	0	0	0	0	0	0	0	0
hsa-miR-527	0	0	0	0	0	0	0	0	0	0	0	0	0	0	0	0	0	0	0	0	0
hsa-miR-4270	0	0	0	0	0	0	0	0	0	0	0	0	0	0	0	0	0	0	0	0	0
hsa-miR-4499	0	0	0	0	0	0	0	0	0	0	0	0	0	0	0	0	0	0	0	0	0
hsa-miR-1321	0	0	0	0	0	0	0	0	0	0	0	0	0	0	0	0	0	0	0	0	0
hsa-miR-4305	0	0	0	0	0	0	0	0	0	0	0	0	0	0	0	0	0	0	0	0	0
hsa-miR-759	0	0	0	0	0	0	0	0	0	0	0	0	0	0	0	0	0	0	0	0	0
hsa-miR-1915-5p	0	0	0	0	0	0	0	0	0	0	0	0	0	0	0	0	0	0	0	0	0
hsa-miR-6072	0	0	0	0	0	0	0	0	0	0	0	0	0	0	0	0	0	0	0	0	0
hsa-miR-1539	0	0	0	0	0	0	0	0	0	0	0	0	0	0	0	0	0	0	0	0	0
hsa-miR-6079	0	0	0	0	0	0	0	0	0	0	0	0	0	0	0	0	0	0	0	0	0
hsa-miR-3675-3p	0	0	0	0	0	0	0	0	0	0	0	0	0	0	0	0	0	0	0	0	0
hsa-miR-4700-5p	0	0	0	0	0	0	0	0	0	0	0	0	0	0	0	0	0	0	0	0	0
hsa-miR-3945	0	0	0	0	0	0	0	0	0	0	0	0	0	0	0	0	0	0	0	0	0
hsa-miR-520h	0	0	0	0	0	0	0	0	0	0	0	0	0	0	0	0	0	0	0	0	0
hsa-miR-4713-5p	0	0	0	0	0	0	0	0	0	0	0	0	0	0	0	0	0	0	0	0	0
hsa-miR-4311	0	0	0	0	0	0	0	0	0	0	0	0	0	0	0	0	0	0	0	0	0
hsa-miR-555	0	0	0	0	0	0	0	0	0	0	0	0	0	0	0	0	0	0	0	0	0
hsa-miR-1255b-2-3p	0	0	0	0	0	0	0	0	0	0	0	0	0	0	0	0	0	0	0	0	0
hsa-miR-3927-5p	0	0	0	0	0	0	0	0	0	0	0	0	0	0	0	0	0	0	0	0	0
hsa-miR-5007-3p	0	0	0	0	0	0	0	0	0	0	0	0	0	0	0	0	0	0	0	0	0
hsa-miR-4320	0	0	0	0	0	0	0	0	0	0	0	0	0	0	0	0	0	0	0	0	0
hsa-miR-4782-3p	0	0	0	0	0	0	0	0	0	0	0	0	0	0	0	0	0	0	0	0	0
hsa-miR-4462	0	0	0	0	0	0	0	0	0	0	0	0	0	0	0	0	0	0	0	0	0
hsa-miR-3117-5p	0	0	0	0	0	0	0	0	0	0	0	0	0	0	0	0	0	0	0	0	0
hsa-miR-5704	0	0	0	0	0	0	0	0	0	0	0	0	0	0	0	0	0	0	0	0	0
hsa-miR-4537	0	0	0	0	0	0	0	0	0	0	0	0	0	0	0	0	0	0	0	0	0
hsa-miR-1279	0	0	0	0	0	0	0	0	0	0	0	0	0	0	0	0	0	0	0	0	0
hsa-miR-4656	0	0	0	0	0	0	0	0	0	0	0	0	0	0	0	0	0	0	0	0	0
hsa-miR-4450	0	0	0	0	0	0	0	0	0	0	0	0	0	0	0	0	0	0	0	0	0
hsa-miR-4321	0	0	0	0	0	0	0	0	0	0	0	0	0	0	0	0	0	0	0	0	0
hsa-miR-3922-5p	0	0	0	0	0	0	0	0	0	0	0	0	0	0	0	0	0	0	0	0	0
hsa-miR-3186-5p	0	0	0	0	0	0	0	0	0	0	0	0	0	0	0	0	0	0	0	0	0
hsa-miR-4799-3p	0	0	0	0	0	0	0	0	0	0	0	0	0	0	0	0	0	0	0	0	0
hsa-miR-1587	0	0	0	0	0	0	0	0	0	0	0	0	0	0	0	0	0	0	0	0	0
hsa-miR-2053	0	0	0	0	0	0	0	0	0	0	0	0	0	0	0	0	0	0	0	0	0
hsa-miR-4452	0	0	0	0	0	0	0	0	0	0	0	0	0	0	0	0	0	0	0	0	0
hsa-miR-764	0	0	0	0	0	0	0	0	0	0	0	0	0	0	0	0	0	0	0	0	0
hsa-miR-1236-5p	0	0	0	0	0	0	0	0	0	0	0	0	0	0	0	0	0	0	0	0	0
hsa-miR-4330	0	0	0	0	0	0	0	0	0	0	0	0	0	0	0	0	0	0	0	0	0
hsa-miR-626	0	0	0	0	0	0	0	0	0	0	0	0	0	0	0	0	0	0	0	0	0
hsa-miR-3064-3p	0	0	0	0	0	0	0	0	0	0	0	0	0	0	0	0	0	0	0	0	0
hsa-miR-6509-3p	0	0	0	0	0	0	0	0	0	0	0	0	0	0	0	0	0	0	0	0	0
hsa-miR-670	0	0	0	0	0	0	0	0	0	0	0	0	0	0	0	0	0	0	0	0	0
hsa-miR-548au-3p	0	0	0	0	0	0	0	0	0	0	0	0	0	0	0	0	0	0	0	0	0
hsa-miR-614	0	0	0	0	0	0	0	0	0	0	0	0	0	0	0	0	0	0	0	0	0
hsa-miR-4251	0	0	0	0	0	0	0	0	0	0	0	0	0	0	0	0	0	0	0	0	0
hsa-miR-3193	0	0	0	0	0	0	0	0	0	0	0	0	0	0	0	0	0	0	0	0	0
hsa-miR-4530	0	0	0	0	0	0	0	0	0	0	0	0	0	0	0	0	0	0	0	0	0
hsa-miR-4707-5p	0	0	0	0	0	0	0	0	0	0	0	0	0	0	0	0	0	0	0	0	0
hsa-miR-6068	0	0	0	0	0	0	0	0	0	0	0	0	0	0	0	0	0	0	0	0	0
hsa-miR-3689e	0	0	0	0	0	0	0	0	0	0	0	0	0	0	0	0	0	0	0	0	0
hsa-miR-5195-3p	0	0	0	0	0	0	0	0	0	0	0	0	0	0	0	0	0	0	0	0	0
hsa-miR-4295	0	0	0	0	0	0	0	0	0	0	0	0	0	0	0	0	0	0	0	0	0
hsa-miR-5584-3p	0	0	0	0	0	0	0	0	0	0	0	0	0	0	0	0	0	0	0	0	0
hsa-miR-4272	0	0	0	0	0	0	0	0	0	0	0	0	0	0	0	0	0	0	0	0	0
hsa-miR-4684-3p	0	0	0	0	0	0	0	0	0	0	0	0	0	0	0	0	0	0	0	0	0
hsa-miR-373-5p	0	0	0	0	0	0	0	0	0	0	0	0	0	0	0	0	0	0	0	0	0
hsa-miR-564	0	0	0	0	0	0	0	0	0	0	0	0	0	0	0	0	0	0	0	0	0
hsa-miR-367-3p	0	0	0	0	0	0	0	0	0	0	0	0	0	0	0	0	0	0	0	0	0
hsa-miR-601	0	0	0	0	0	0	0	0	0	0	0	0	0	0	0	0	0	0	0	0	0
hsa-miR-4289	0	0	0	0	0	0	0	0	0	0	0	0	0	0	0	0	0	0	0	0	0
hsa-miR-4327	0	0	0	0	0	0	0	0	0	0	0	0	0	0	0	0	0	0	0	0	0
hsa-miR-4665-3p	0	0	0	0	0	0	0	0	0	0	0	0	0	0	0	0	0	0	0	0	0
hsa-miR-5191	0	0	0	0	0	0	0	0	0	0	0	0	0	0	0	0	0	0	0	0	0
hsa-miR-3922-3p	0	0	0	0	0	0	0	0	0	0	0	0	0	0	0	0	0	0	0	0	0
hsa-miR-5685	0	0	0	0	0	0	0	0	0	0	0	0	0	0	0	0	0	0	0	0	0
hsa-miR-3668	0	0	0	0	0	0	0	0	0	0	0	0	0	0	0	0	0	0	0	0	0
hsa-miR-499b-5p	0	0	0	0	0	0	0	0	0	0	0	0	0	0	0	0	0	0	0	0	0
hsa-miR-1272	0	0	0	0	0	0	0	0	0	0	0	0	0	0	0	0	0	0	0	0	0
hsa-miR-3673	0	0	0	0	0	0	0	0	0	0	0	0	0	0	0	0	0	0	0	0	0
hsa-miR-4313	0	0	0	0	0	0	0	0	0	0	0	0	0	0	0	0	0	0	0	0	0
hsa-miR-3184-3p	0	0	0	0	0	0	0	0	0	0	0	0	0	0	0	0	0	0	0	0	0
hsa-miR-4436b-5p	0	0	0	0	0	0	0	0	0	0	0	0	0	0	0	0	0	0	0	0	0
hsa-miR-5572	0	0	0	0	0	0	0	0	0	0	0	0	0	0	0	0	0	0	0	0	0
hsa-miR-3121-5p	0	0	0	0	0	0	0	0	0	0	0	0	0	0	0	0	0	0	0	0	0
hsa-miR-219-2-3p	0	0	0	0	0	0	0	0	0	0	0	0	0	0	0	0	0	0	0	0	0
hsa-miR-515-3p	0	0	0	0	0	0	0	0	0	0	0	0	0	0	0	0	0	0	0	0	0
hsa-miR-5694	0	0	0	0	0	0	0	0	0	0	0	0	0	0	0	0	0	0	0	0	0
hsa-miR-3679-3p	0	0	0	0	0	0	0	0	0	0	0	0	0	0	0	0	0	0	0	0	0
hsa-miR-6134	0	0	0	0	0	0	0	0	0	0	0	0	0	0	0	0	0	0	0	0	0
hsa-miR-4317	0	0	0	0	0	0	0	0	0	0	0	0	0	0	0	0	0	0	0	0	0
hsa-miR-514a-5p	0	0	0	0	0	0	0	0	0	0	0	0	0	0	0	0	0	0	0	0	0
hsa-miR-3190-5p	0	0	0	0	0	0	0	0	0	0	0	0	0	0	0	0	0	0	0	0	0
hsa-miR-548x-3p	0	0	0	0	0	0	0	0	0	0	0	0	0	0	0	0	0	0	0	0	0
hsa-miR-1183	0	0	0	0	0	0	0	0	0	0	0	0	0	0	0	0	0	0	0	0	0
hsa-miR-4694-3p	0	0	0	0	0	0	0	0	0	0	0	0	0	0	0	0	0	0	0	0	0
hsa-miR-595	0	0	0	0	0	0	0	0	0	0	0	0	0	0	0	0	0	0	0	0	0
hsa-miR-662	0	0	0	0	0	0	0	0	0	0	0	0	0	0	0	0	0	0	0	0	0
hsa-miR-4736	0	0	0	0	0	0	0	0	0	0	0	0	0	0	0	0	0	0	0	0	0
hsa-miR-4474-5p	0	0	0	0	0	0	0	0	0	0	0	0	0	0	0	0	0	0	0	0	0
hsa-miR-520d-5p	0	0	0	0	0	0	0	0	0	0	0	0	0	0	0	0	0	0	0	0	0
hsa-miR-1205	0	0	0	0	0	0	0	0	0	0	0	0	0	0	0	0	0	0	0	0	0
hsa-miR-3147	0	0	0	0	0	0	0	0	0	0	0	0	0	0	0	0	0	0	0	0	0
hsa-miR-4653-3p	0	0	0	0	0	0	0	0	0	0	0	0	0	0	0	0	0	0	0	0	0
hsa-miR-3529-5p	0	0	0	0	0	0	0	0	0	0	0	0	0	0	0	0	0	0	0	0	0
hsa-miR-5007-5p	0	0	0	0	0	0	0	0	0	0	0	0	0	0	0	0	0	0	0	0	0
hsa-miR-4275	0	0	0	0	0	0	0	0	0	0	0	0	0	0	0	0	0	0	0	0	0
hsa-miR-3937	0	0	0	0	0	0	0	0	0	0	0	0	0	0	0	0	0	0	0	0	0
hsa-miR-3649	0	0	0	0	0	0	0	0	0	0	0	0	0	0	0	0	0	0	0	0	0
hsa-miR-510	0	0	0	0	0	0	0	0	0	0	0	0	0	0	0	0	0	0	0	0	0
hsa-miR-4754	0	0	0	0	0	0	0	0	0	0	0	0	0	0	0	0	0	0	0	0	0
hsa-miR-5586-3p	0	0	0	0	0	0	0	0	0	0	0	0	0	0	0	0	0	0	0	0	0
hsa-miR-522-3p	0	0	0	0	0	0	0	0	0	0	0	0	0	0	0	0	0	0	0	0	0
hsa-miR-3669	0	0	0	0	0	0	0	0	0	0	0	0	0	0	0	0	0	0	0	0	0
hsa-miR-3689b-5p	0	0	0	0	0	0	0	0	0	0	0	0	0	0	0	0	0	0	0	0	0
hsa-miR-4306	0	0	0	0	0	0	0	0	0	0	0	0	0	0	0	0	0	0	0	0	0
hsa-miR-4515	0	0	0	0	0	0	0	0	0	0	0	0	0	0	0	0	0	0	0	0	0
hsa-miR-4755-5p	0	0	0	0	0	0	0	0	0	0	0	0	0	0	0	0	0	0	0	0	0
hsa-miR-548aj-3p	0	0	0	0	0	0	0	0	0	0	0	0	0	0	0	0	0	0	0	0	0
hsa-miR-4296	0	0	0	0	0	0	0	0	0	0	0	0	0	0	0	0	0	0	0	0	0
hsa-miR-5698	0	0	0	0	0	0	0	0	0	0	0	0	0	0	0	0	0	0	0	0	0
hsa-miR-4477b	0	0	0	0	0	0	0	0	0	0	0	0	0	0	0	0	0	0	0	0	0
hsa-miR-6077	0	0	0	0	0	0	0	0	0	0	0	0	0	0	0	0	0	0	0	0	0
hsa-miR-4693-5p	0	0	0	0	0	0	0	0	0	0	0	0	0	0	0	0	0	0	0	0	0
hsa-miR-3123	0	0	0	0	0	0	0	0	0	0	0	0	0	0	0	0	0	0	0	0	0
hsa-miR-4283	0	0	0	0	0	0	0	0	0	0	0	0	0	0	0	0	0	0	0	0	0
hsa-miR-922	0	0	0	0	0	0	0	0	0	0	0	0	0	0	0	0	0	0	0	0	0
hsa-miR-4789-3p	0	0	0	0	0	0	0	0	0	0	0	0	0	0	0	0	0	0	0	0	0
hsa-miR-4284	0	0	0	0	0	0	0	0	0	0	0	0	0	0	0	0	0	0	0	0	0
hsa-miR-548ad	0	0	0	0	0	0	0	0	0	0	0	0	0	0	0	0	0	0	0	0	0
hsa-miR-5581-5p	0	0	0	0	0	0	0	0	0	0	0	0	0	0	0	0	0	0	0	0	0
hsa-miR-875-5p	0	0	0	0	0	0	0	0	0	0	0	0	0	0	0	0	0	0	0	0	0
hsa-miR-513a-5p	0	0	0	0	0	0	0	0	0	0	0	0	0	0	0	0	0	0	0	0	0
hsa-miR-4269	0	0	0	0	0	0	0	0	0	0	0	0	0	0	0	0	0	0	0	0	0
hsa-miR-650	0	0	0	0	0	0	0	0	0	0	0	0	0	0	0	0	0	0	0	0	0
hsa-miR-3667-5p	0	0	0	0	0	0	0	0	0	0	0	0	0	0	0	0	0	0	0	0	0
hsa-miR-1184	0	0	0	0	0	0	0	0	0	0	0	0	0	0	0	0	0	0	0	0	0
hsa-miR-4256	0	0	0	0	0	0	0	0	0	0	0	0	0	0	0	0	0	0	0	0	0
hsa-miR-4480	0	0	0	0	0	0	0	0	0	0	0	0	0	0	0	0	0	0	0	0	0
hsa-miR-3118	0	0	0	0	0	0	0	0	0	0	0	0	0	0	0	0	0	0	0	0	0
hsa-miR-6076	0	0	0	0	0	0	0	0	0	0	0	0	0	0	0	0	0	0	0	0	0
hsa-miR-4531	0	0	0	0	0	0	0	0	0	0	0	0	0	0	0	0	0	0	0	0	0
hsa-miR-1290	0	0	0	0	0	0	0	0	0	0	0	0	0	0	0	0	0	0	0	0	0
hsa-miR-4797-5p	0	0	0	0	0	0	0	0	0	0	0	0	0	0	0	0	0	0	0	0	0
hsa-miR-4778-5p	0	0	0	0	0	0	0	0	0	0	0	0	0	0	0	0	0	0	0	0	0
hsa-miR-892c-3p	0	0	0	0	0	0	0	0	0	0	0	0	0	0	0	0	0	0	0	0	0
hsa-miR-378j	0	0	0	0	0	0	0	0	0	0	0	0	0	0	0	0	0	0	0	0	0
hsa-miR-3662	0	0	0	0	0	0	0	0	0	0	0	0	0	0	0	0	0	0	0	0	0
hsa-miR-4278	0	0	0	0	0	0	0	0	0	0	0	0	0	0	0	0	0	0	0	0	0
hsa-miR-4640-5p	0	0	0	0	0	0	0	0	0	0	0	0	0	0	0	0	0	0	0	0	0
hsa-miR-4540	0	0	0	0	0	0	0	0	0	0	0	0	0	0	0	0	0	0	0	0	0
hsa-miR-5009-3p	0	0	0	0	0	0	0	0	0	0	0	0	0	0	0	0	0	0	0	0	0
hsa-miR-4456	0	0	0	0	0	0	0	0	0	0	0	0	0	0	0	0	0	0	0	0	0
hsa-miR-514b-5p	0	0	0	0	0	0	0	0	0	0	0	0	0	0	0	0	0	0	0	0	0
hsa-miR-4723-3p	0	0	0	0	0	0	0	0	0	0	0	0	0	0	0	0	0	0	0	0	0
hsa-miR-638	0	0	0	0	0	0	0	0	0	0	0	0	0	0	0	0	0	0	0	0	0
hsa-miR-4267	0	0	0	0	0	0	0	0	0	0	0	0	0	0	0	0	0	0	0	0	0
hsa-miR-4667-3p	0	0	0	0	0	0	0	0	0	0	0	0	0	0	0	0	0	0	0	0	0
hsa-miR-4325	0	0	0	0	0	0	0	0	0	0	0	0	0	0	0	0	0	0	0	0	0
hsa-miR-526b-3p	0	0	0	0	0	0	0	0	0	0	0	0	0	0	0	0	0	0	0	0	0
hsa-miR-4669	0	0	0	0	0	0	0	0	0	0	0	0	0	0	0	0	0	0	0	0	0
hsa-miR-647	0	0	0	0	0	0	0	0	0	0	0	0	0	0	0	0	0	0	0	0	0
hsa-miR-4726-3p	0	0	0	0	0	0	0	0	0	0	0	0	0	0	0	0	0	0	0	0	0
hsa-miR-3976	0	0	0	0	0	0	0	0	0	0	0	0	0	0	0	0	0	0	0	0	0
hsa-miR-3196	0	0	0	0	0	0	0	0	0	0	0	0	0	0	0	0	0	0	0	0	0
hsa-miR-1273g-5p	0	0	0	0	0	0	0	0	0	0	0	0	0	0	0	0	0	0	0	0	0
hsa-miR-6716-5p	0	0	0	0	0	0	0	0	0	0	0	0	0	0	0	0	0	0	0	0	0
hsa-miR-4663	0	0	0	0	0	0	0	0	0	0	0	0	0	0	0	0	0	0	0	0	0
hsa-miR-4265	0	0	0	0	0	0	0	0	0	0	0	0	0	0	0	0	0	0	0	0	0
hsa-miR-4419a	0	0	0	0	0	0	0	0	0	0	0	0	0	0	0	0	0	0	0	0	0
hsa-miR-6722-5p	0	0	0	0	0	0	0	0	0	0	0	0	0	0	0	0	0	0	0	0	0
hsa-miR-4685-5p	0	0	0	0	0	0	0	0	0	0	0	0	0	0	0	0	0	0	0	0	0
hsa-miR-3978	0	0	0	0	0	0	0	0	0	0	0	0	0	0	0	0	0	0	0	0	0
hsa-miR-1471	0	0	0	0	0	0	0	0	0	0	0	0	0	0	0	0	0	0	0	0	0
hsa-miR-4675	0	0	0	0	0	0	0	0	0	0	0	0	0	0	0	0	0	0	0	0	0
hsa-miR-5590-3p	0	0	0	0	0	0	0	0	0	0	0	0	0	0	0	0	0	0	0	0	0
hsa-miR-4528	0	0	0	0	0	0	0	0	0	0	0	0	0	0	0	0	0	0	0	0	0
hsa-miR-4443	0	0	0	0	0	0	0	0	0	0	0	0	0	0	0	0	0	0	0	0	0
hsa-miR-1238-3p	0	0	0	0	0	0	0	0	0	0	0	0	0	0	0	0	0	0	0	0	0
hsa-miR-548an	0	0	0	0	0	0	0	0	0	0	0	0	0	0	0	0	0	0	0	0	0
hsa-miR-548m	0	0	0	0	0	0	0	0	0	0	0	0	0	0	0	0	0	0	0	0	0
hsa-miR-6070	0	0	0	0	0	0	0	0	0	0	0	0	0	0	0	0	0	0	0	0	0
hsa-miR-4448	0	0	0	0	0	0	0	0	0	0	0	0	0	0	0	0	0	0	0	0	0
hsa-miR-4430	0	0	0	0	0	0	0	0	0	0	0	0	0	0	0	0	0	0	0	0	0
hsa-miR-1295b-3p	0	0	0	0	0	0	0	0	0	0	0	0	0	0	0	0	0	0	0	0	0
hsa-miR-3136-3p	0	0	0	0	0	0	0	0	0	0	0	0	0	0	0	0	0	0	0	0	0
hsa-miR-3191-5p	0	0	0	0	0	0	0	0	0	0	0	0	0	0	0	0	0	0	0	0	0
hsa-miR-5688	0	0	0	0	0	0	0	0	0	0	0	0	0	0	0	0	0	0	0	0	0
hsa-miR-4494	0	0	0	0	0	0	0	0	0	0	0	0	0	0	0	0	0	0	0	0	0
hsa-miR-4439	0	0	0	0	0	0	0	0	0	0	0	0	0	0	0	0	0	0	0	0	0
hsa-miR-4753-3p	0	0	0	0	0	0	0	0	0	0	0	0	0	0	0	0	0	0	0	0	0
hsa-miR-1825	0	0	0	0	0	0	0	0	0	0	0	0	0	0	0	0	0	0	0	0	0
hsa-miR-3925-5p	0	0	0	0	0	0	0	0	0	0	0	0	0	0	0	0	0	0	0	0	0
hsa-miR-4458	0	0	0	0	0	0	0	0	0	0	0	0	0	0	0	0	0	0	0	0	0
hsa-miR-3934-3p	0	0	0	0	0	0	0	0	0	0	0	0	0	0	0	0	0	0	0	0	0
hsa-miR-4746-3p	0	0	0	0	0	0	0	0	0	0	0	0	0	0	0	0	0	0	0	0	0
hsa-miR-5787	0	0	0	0	0	0	0	0	0	0	0	0	0	0	0	0	0	0	0	0	0
hsa-miR-1909-3p	0	0	0	0	0	0	0	0	0	0	0	0	0	0	0	0	0	0	0	0	0
hsa-miR-4760-3p	0	0	0	0	0	0	0	0	0	0	0	0	0	0	0	0	0	0	0	0	0
hsa-miR-3683	0	0	0	0	0	0	0	0	0	0	0	0	0	0	0	0	0	0	0	0	0
hsa-miR-619	0	0	0	0	0	0	0	0	0	0	0	0	0	0	0	0	0	0	0	0	0
hsa-miR-587	0	0	0	0	0	0	0	0	0	0	0	0	0	0	0	0	0	0	0	0	0
hsa-miR-5589-3p	0	0	0	0	0	0	0	0	0	0	0	0	0	0	0	0	0	0	0	0	0
hsa-miR-4417	0	0	0	0	0	0	0	0	0	0	0	0	0	0	0	0	0	0	0	0	0
hsa-miR-4747-3p	0	0	0	0	0	0	0	0	0	0	0	0	0	0	0	0	0	0	0	0	0
hsa-miR-6074	0	0	0	0	0	0	0	0	0	0	0	0	0	0	0	0	0	0	0	0	0
hsa-miR-506-5p	0	0	0	0	0	0	0	0	0	0	0	0	0	0	0	0	0	0	0	0	0
hsa-miR-6129	0	0	0	0	0	0	0	0	0	0	0	0	0	0	0	0	0	0	0	0	0
hsa-miR-1182	0	0	0	0	0	0	0	0	0	0	0	0	0	0	0	0	0	0	0	0	0
hsa-miR-4470	0	0	0	0	0	0	0	0	0	0	0	0	0	0	0	0	0	0	0	0	0
hsa-miR-1203	0	0	0	0	0	0	0	0	0	0	0	0	0	0	0	0	0	0	0	0	0
hsa-miR-3137	0	0	0	0	0	0	0	0	0	0	0	0	0	0	0	0	0	0	0	0	0
hsa-miR-4787-5p	0	0	0	0	0	0	0	0	0	0	0	0	0	0	0	0	0	0	0	0	0
hsa-miR-4713-3p	0	0	0	0	0	0	0	0	0	0	0	0	0	0	0	0	0	0	0	0	0
hsa-miR-5579-3p	0	0	0	0	0	0	0	0	0	0	0	0	0	0	0	0	0	0	0	0	0
hsa-miR-5100	0	0	0	0	0	0	0	0	0	0	0	0	0	0	0	0	0	0	0	0	0
hsa-miR-5011-5p	0	0	0	0	0	0	0	0	0	0	0	0	0	0	0	0	0	0	0	0	0
hsa-miR-4451	0	0	0	0	0	0	0	0	0	0	0	0	0	0	0	0	0	0	0	0	0
hsa-miR-3201	0	0	0	0	0	0	0	0	0	0	0	0	0	0	0	0	0	0	0	0	0
hsa-miR-1305	0	0	0	0	0	0	0	0	0	0	0	0	0	0	0	0	0	0	0	0	0
hsa-miR-4763-3p	0	0	0	0	0	0	0	0	0	0	0	0	0	0	0	0	0	0	0	0	0
hsa-miR-302f	0	0	0	0	0	0	0	0	0	0	0	0	0	0	0	0	0	0	0	0	0
hsa-miR-6089	0	0	0	0	0	0	0	0	0	0	0	0	0	0	0	0	0	0	0	0	0
hsa-miR-606	0	0	0	0	0	0	0	0	0	0	0	0	0	0	0	0	0	0	0	0	0
hsa-miR-520a-5p	0	0	0	0	0	0	0	0	0	0	0	0	0	0	0	0	0	0	0	0	0
hsa-miR-519e-3p	0	0	0	0	0	0	0	0	0	0	0	0	0	0	0	0	0	0	0	0	0
hsa-miR-4533	0	0	0	0	0	0	0	0	0	0	0	0	0	0	0	0	0	0	0	0	0
hsa-miR-521	0	0	0	0	0	0	0	0	0	0	0	0	0	0	0	0	0	0	0	0	0
hsa-miR-3941	0	0	0	0	0	0	0	0	0	0	0	0	0	0	0	0	0	0	0	0	0
hsa-miR-1178-5p	0	0	0	0	0	0	0	0	0	0	0	0	0	0	0	0	0	0	0	0	0
hsa-miR-646	0	0	0	0	0	0	0	0	0	0	0	0	0	0	0	0	0	0	0	0	0
hsa-miR-518c-5p	0	0	0	0	0	0	0	0	0	0	0	0	0	0	0	0	0	0	0	0	0
hsa-miR-6715b-5p	0	0	0	0	0	0	0	0	0	0	0	0	0	0	0	0	0	0	0	0	0
hsa-miR-4483	0	0	0	0	0	0	0	0	0	0	0	0	0	0	0	0	0	0	0	0	0
hsa-miR-1281	0	0	0	0	0	0	0	0	0	0	0	0	0	0	0	0	0	0	0	0	0
hsa-miR-5192	0	0	0	0	0	0	0	0	0	0	0	0	0	0	0	0	0	0	0	0	0
hsa-miR-3657	0	0	0	0	0	0	0	0	0	0	0	0	0	0	0	0	0	0	0	0	0
hsa-miR-4262	0	0	0	0	0	0	0	0	0	0	0	0	0	0	0	0	0	0	0	0	0
hsa-miR-4691-5p	0	0	0	0	0	0	0	0	0	0	0	0	0	0	0	0	0	0	0	0	0
hsa-miR-3148	0	0	0	0	0	0	0	0	0	0	0	0	0	0	0	0	0	0	0	0	0
hsa-miR-4762-3p	0	0	0	0	0	0	0	0	0	0	0	0	0	0	0	0	0	0	0	0	0
hsa-miR-4324	0	0	0	0	0	0	0	0	0	0	0	0	0	0	0	0	0	0	0	0	0
hsa-miR-4492	0	0	0	0	0	0	0	0	0	0	0	0	0	0	0	0	0	0	0	0	0
hsa-miR-1207-3p	0	0	0	0	0	0	0	0	0	0	0	0	0	0	0	0	0	0	0	0	0
hsa-miR-4460	0	0	0	0	0	0	0	0	0	0	0	0	0	0	0	0	0	0	0	0	0
hsa-miR-5681a	0	0	0	0	0	0	0	0	0	0	0	0	0	0	0	0	0	0	0	0	0
hsa-miR-3974	0	0	0	0	0	0	0	0	0	0	0	0	0	0	0	0	0	0	0	0	0
hsa-miR-6083	0	0	0	0	0	0	0	0	0	0	0	0	0	0	0	0	0	0	0	0	0
hsa-miR-3675-5p	0	0	0	0	0	0	0	0	0	0	0	0	0	0	0	0	0	0	0	0	0
hsa-miR-4752	0	0	0	0	0	0	0	0	0	0	0	0	0	0	0	0	0	0	0	0	0
hsa-miR-3622b-5p	0	0	0	0	0	0	0	0	0	0	0	0	0	0	0	0	0	0	0	0	0
hsa-miR-1273a	0	0	0	0	0	0	0	0	0	0	0	0	0	0	0	0	0	0	0	0	0
hsa-miR-302d-5p	0	0	0	0	0	0	0	0	0	0	0	0	0	0	0	0	0	0	0	0	0
hsa-miR-3923	0	0	0	0	0	0	0	0	0	0	0	0	0	0	0	0	0	0	0	0	0
hsa-miR-5093	0	0	0	0	0	0	0	0	0	0	0	0	0	0	0	0	0	0	0	0	0
hsa-miR-96-3p	0	0	0	0	0	0	0	0	0	0	0	0	0	0	0	0	0	0	0	0	0
hsa-miR-4441	0	0	0	0	0	0	0	0	0	0	0	0	0	0	0	0	0	0	0	0	0
hsa-miR-4666b	0	0	0	0	0	0	0	0	0	0	0	0	0	0	0	0	0	0	0	0	0
hsa-miR-4529-5p	0	0	0	0	0	0	0	0	0	0	0	0	0	0	0	0	0	0	0	0	0
hsa-miR-4535	0	0	0	0	0	0	0	0	0	0	0	0	0	0	0	0	0	0	0	0	0
hsa-miR-4309	0	0	0	0	0	0	0	0	0	0	0	0	0	0	0	0	0	0	0	0	0
hsa-miR-3184-5p	0	0	0	0	0	0	0	0	0	0	0	0	0	0	0	0	0	0	0	0	0
hsa-miR-4633-5p	0	0	0	0	0	0	0	0	0	0	0	0	0	0	0	0	0	0	0	0	0
hsa-miR-4676-5p	0	0	0	0	0	0	0	0	0	0	0	0	0	0	0	0	0	0	0	0	0
hsa-miR-1324	0	0	0	0	0	0	0	0	0	0	0	0	0	0	0	0	0	0	0	0	0
hsa-miR-4290	0	0	0	0	0	0	0	0	0	0	0	0	0	0	0	0	0	0	0	0	0
hsa-miR-3926	0	0	0	0	0	0	0	0	0	0	0	0	0	0	0	0	0	0	0	0	0
hsa-miR-617	0	0	0	0	0	0	0	0	0	0	0	0	0	0	0	0	0	0	0	0	0
hsa-miR-4285	0	0	0	0	0	0	0	0	0	0	0	0	0	0	0	0	0	0	0	0	0
hsa-miR-1178-3p	0	0	0	0	0	0	0	0	0	0	0	0	0	0	0	0	0	0	0	0	0
hsa-miR-4464	0	0	0	0	0	0	0	0	0	0	0	0	0	0	0	0	0	0	0	0	0
hsa-miR-1297	0	0	0	0	0	0	0	0	0	0	0	0	0	0	0	0	0	0	0	0	0
hsa-miR-591	0	0	0	0	0	0	0	0	0	0	0	0	0	0	0	0	0	0	0	0	0
hsa-miR-1208	0	0	0	0	0	0	0	0	0	0	0	0	0	0	0	0	0	0	0	0	0
hsa-miR-19a-5p	0	0	0	0	0	0	0	0	0	0	0	0	0	0	0	0	0	0	0	0	0
hsa-miR-1253	0	0	0	0	0	0	0	0	0	0	0	0	0	0	0	0	0	0	0	0	0
hsa-miR-4764-5p	0	0	0	0	0	0	0	0	0	0	0	0	0	0	0	0	0	0	0	0	0
hsa-miR-936	0	0	0	0	0	0	0	0	0	0	0	0	0	0	0	0	0	0	0	0	0
hsa-miR-921	0	0	0	0	0	0	0	0	0	0	0	0	0	0	0	0	0	0	0	0	0
hsa-miR-2861	0	0	0	0	0	0	0	0	0	0	0	0	0	0	0	0	0	0	0	0	0
hsa-miR-4655-3p	0	0	0	0	0	0	0	0	0	0	0	0	0	0	0	0	0	0	0	0	0
hsa-miR-4776-3p	0	0	0	0	0	0	0	0	0	0	0	0	0	0	0	0	0	0	0	0	0
hsa-miR-4738-5p	0	0	0	0	0	0	0	0	0	0	0	0	0	0	0	0	0	0	0	0	0
hsa-miR-761	0	0	0	0	0	0	0	0	0	0	0	0	0	0	0	0	0	0	0	0	0
hsa-miR-3198	0	0	0	0	0	0	0	0	0	0	0	0	0	0	0	0	0	0	0	0	0
hsa-miR-3139	0	0	0	0	0	0	0	0	0	0	0	0	0	0	0	0	0	0	0	0	0
hsa-miR-4481	0	0	0	0	0	0	0	0	0	0	0	0	0	0	0	0	0	0	0	0	0
hsa-miR-6719-3p	0	0	0	0	0	0	0	0	0	0	0	0	0	0	0	0	0	0	0	0	0
hsa-miR-4652-5p	0	0	0	0	0	0	0	0	0	0	0	0	0	0	0	0	0	0	0	0	0
hsa-miR-498	0	0	0	0	0	0	0	0	0	0	0	0	0	0	0	0	0	0	0	0	0
hsa-miR-4318	0	0	0	0	0	0	0	0	0	0	0	0	0	0	0	0	0	0	0	0	0
hsa-miR-1469	0	0	0	0	0	0	0	0	0	0	0	0	0	0	0	0	0	0	0	0	0
hsa-miR-4490	0	0	0	0	0	0	0	0	0	0	0	0	0	0	0	0	0	0	0	0	0
hsa-miR-4260	0	0	0	0	0	0	0	0	0	0	0	0	0	0	0	0	0	0	0	0	0
hsa-miR-633	0	0	0	0	0	0	0	0	0	0	0	0	0	0	0	0	0	0	0	0	0
hsa-miR-5681b	0	0	0	0	0	0	0	0	0	0	0	0	0	0	0	0	0	0	0	0	0
hsa-miR-6084	0	0	0	0	0	0	0	0	0	0	0	0	0	0	0	0	0	0	0	0	0
hsa-miR-4471	0	0	0	0	0	0	0	0	0	0	0	0	0	0	0	0	0	0	0	0	0
hsa-miR-4445-5p	0	0	0	0	0	0	0	0	0	0	0	0	0	0	0	0	0	0	0	0	0
hsa-miR-5686	0	0	0	0	0	0	0	0	0	0	0	0	0	0	0	0	0	0	0	0	0
hsa-miR-4786-3p	0	0	0	0	0	0	0	0	0	0	0	0	0	0	0	0	0	0	0	0	0
hsa-miR-553	0	0	0	0	0	0	0	0	0	0	0	0	0	0	0	0	0	0	0	0	0
hsa-miR-802	0	0	0	0	0	0	0	0	0	0	0	0	0	0	0	0	0	0	0	0	0
hsa-miR-568	0	0	0	0	0	0	0	0	0	0	0	0	0	0	0	0	0	0	0	0	0
hsa-miR-3714	0	0	0	0	0	0	0	0	0	0	0	0	0	0	0	0	0	0	0	0	0
hsa-miR-596	0	0	0	0	0	0	0	0	0	0	0	0	0	0	0	0	0	0	0	0	0
hsa-miR-3189-5p	0	0	0	0	0	0	0	0	0	0	0	0	0	0	0	0	0	0	0	0	0
hsa-miR-4773	0	0	0	0	0	0	0	0	0	0	0	0	0	0	0	0	0	0	0	0	0
hsa-miR-4468	0	0	0	0	0	0	0	0	0	0	0	0	0	0	0	0	0	0	0	0	0
hsa-miR-4653-5p	0	0	0	0	0	0	0	0	0	0	0	0	0	0	0	0	0	0	0	0	0
hsa-miR-4668-3p	0	0	0	0	0	0	0	0	0	0	0	0	0	0	0	0	0	0	0	0	0
hsa-miR-302c-3p	0	0	0	0	0	0	0	0	0	0	0	0	0	0	0	0	0	0	0	0	0
hsa-miR-1261	0	0	0	0	0	0	0	0	0	0	0	0	0	0	0	0	0	0	0	0	0
hsa-miR-5703	0	0	0	0	0	0	0	0	0	0	0	0	0	0	0	0	0	0	0	0	0
hsa-miR-5087	0	0	0	0	0	0	0	0	0	0	0	0	0	0	0	0	0	0	0	0	0
hsa-miR-450b-3p	0	0	0	0	0	0	0	0	0	0	0	0	0	0	0	0	0	0	0	0	0
hsa-miR-4497	0	0	0	0	0	0	0	0	0	0	0	0	0	0	0	0	0	0	0	0	0
hsa-miR-4258	0	0	0	0	0	0	0	0	0	0	0	0	0	0	0	0	0	0	0	0	0
hsa-miR-1181	0	0	0	0	0	0	0	0	0	0	0	0	0	0	0	0	0	0	0	0	0
hsa-miR-4447	0	0	0	0	0	0	0	0	0	0	0	0	0	0	0	0	0	0	0	0	0
hsa-miR-3182	0	0	0	0	0	0	0	0	0	0	0	0	0	0	0	0	0	0	0	0	0
hsa-miR-4271	0	0	0	0	0	0	0	0	0	0	0	0	0	0	0	0	0	0	0	0	0
hsa-miR-4790-3p	0	0	0	0	0	0	0	0	0	0	0	0	0	0	0	0	0	0	0	0	0
hsa-miR-6082	0	0	0	0	0	0	0	0	0	0	0	0	0	0	0	0	0	0	0	0	0
hsa-miR-1228-5p	0	0	0	0	0	0	0	0	0	0	0	0	0	0	0	0	0	0	0	0	0
hsa-miR-1204	0	0	0	0	0	0	0	0	0	0	0	0	0	0	0	0	0	0	0	0	0
hsa-miR-3156-5p	0	0	0	0	0	0	0	0	0	0	0	0	0	0	0	0	0	0	0	0	0
hsa-miR-607	0	0	0	0	0	0	0	0	0	0	0	0	0	0	0	0	0	0	0	0	0
hsa-miR-520e	0	0	0	0	0	0	0	0	0	0	0	0	0	0	0	0	0	0	0	0	0
hsa-miR-3152-3p	0	0	0	0	0	0	0	0	0	0	0	0	0	0	0	0	0	0	0	0	0
hsa-miR-520c-5p	0	0	0	0	0	0	0	0	0	0	0	0	0	0	0	0	0	0	0	0	0
hsa-miR-4766-5p	0	0	0	0	0	0	0	0	0	0	0	0	0	0	0	0	0	0	0	0	0
hsa-miR-3150b-5p	0	0	0	0	0	0	0	0	0	0	0	0	0	0	0	0	0	0	0	0	0
hsa-miR-4716-3p	0	0	0	0	0	0	0	0	0	0	0	0	0	0	0	0	0	0	0	0	0
hsa-miR-1206	0	0	0	0	0	0	0	0	0	0	0	0	0	0	0	0	0	0	0	0	0
hsa-miR-6502-3p	0	0	0	0	0	0	0	0	0	0	0	0	0	0	0	0	0	0	0	0	0
hsa-miR-3178	0	0	0	0	0	0	0	0	0	0	0	0	0	0	0	0	0	0	0	0	0
hsa-miR-3667-3p	0	0	0	0	0	0	0	0	0	0	0	0	0	0	0	0	0	0	0	0	0
hsa-miR-4495	0	0	0	0	0	0	0	0	0	0	0	0	0	0	0	0	0	0	0	0	0
hsa-miR-4538	0	0	0	0	0	0	0	0	0	0	0	0	0	0	0	0	0	0	0	0	0
hsa-miR-6722-3p	0	0	0	0	0	0	0	0	0	0	0	0	0	0	0	0	0	0	0	0	0
hsa-miR-6126	0	0	0	0	0	0	0	0	0	0	0	0	0	0	0	0	0	0	0	0	0
hsa-miR-378h	0	0	0	0	0	0	0	0	0	0	0	0	0	0	0	0	0	0	0	0	0
hsa-miR-3973	0	0	0	0	0	0	0	0	0	0	0	0	0	0	0	0	0	0	0	0	0
hsa-miR-4719	0	0	0	0	0	0	0	0	0	0	0	0	0	0	0	0	0	0	0	0	0
hsa-miR-19b-2-5p	0	0	0	0	0	0	0	0	0	0	0	0	0	0	0	0	0	0	0	0	0
hsa-miR-4727-5p	0	0	0	0	0	0	0	0	0	0	0	0	0	0	0	0	0	0	0	0	0
hsa-miR-4322	0	0	0	0	0	0	0	0	0	0	0	0	0	0	0	0	0	0	0	0	0
hsa-miR-620	0	0	0	0	0	0	0	0	0	0	0	0	0	0	0	0	0	0	0	0	0
hsa-miR-4329	0	0	0	0	0	0	0	0	0	0	0	0	0	0	0	0	0	0	0	0	0
hsa-miR-548at-3p	0	0	0	0	0	0	0	0	0	0	0	0	0	0	0	0	0	0	0	0	0
hsa-miR-4704-3p	0	0	0	0	0	0	0	0	0	0	0	0	0	0	0	0	0	0	0	0	0
hsa-miR-3167	0	0	0	0	0	0	0	0	0	0	0	0	0	0	0	0	0	0	0	0	0
hsa-miR-6127	0	0	0	0	0	0	0	0	0	0	0	0	0	0	0	0	0	0	0	0	0
hsa-miR-4720-5p	0	0	0	0	0	0	0	0	0	0	0	0	0	0	0	0	0	0	0	0	0
hsa-miR-3144-3p	0	0	0	0	0	0	0	0	0	0	0	0	0	0	0	0	0	0	0	0	0
hsa-miR-5684	0	0	0	0	0	0	0	0	0	0	0	0	0	0	0	0	0	0	0	0	0
hsa-miR-6133	0	0	0	0	0	0	0	0	0	0	0	0	0	0	0	0	0	0	0	0	0
hsa-miR-4281	0	0	0	0	0	0	0	0	0	0	0	0	0	0	0	0	0	0	0	0	0
hsa-miR-4301	0	0	0	0	0	0	0	0	0	0	0	0	0	0	0	0	0	0	0	0	0
hsa-miR-1227-5p	0	0	0	0	0	0	0	0	0	0	0	0	0	0	0	0	0	0	0	0	0
hsa-miR-583	0	0	0	0	0	0	0	0	0	0	0	0	0	0	0	0	0	0	0	0	0
hsa-miR-4298	0	0	0	0	0	0	0	0	0	0	0	0	0	0	0	0	0	0	0	0	0
hsa-miR-611	0	0	0	0	0	0	0	0	0	0	0	0	0	0	0	0	0	0	0	0	0
hsa-miR-4703-5p	0	0	0	0	0	0	0	0	0	0	0	0	0	0	0	0	0	0	0	0	0
hsa-miR-5008-5p	0	0	0	0	0	0	0	0	0	0	0	0	0	0	0	0	0	0	0	0	0
hsa-miR-4700-3p	0	0	0	0	0	0	0	0	0	0	0	0	0	0	0	0	0	0	0	0	0
hsa-miR-4287	0	0	0	0	0	0	0	0	0	0	0	0	0	0	0	0	0	0	0	0	0
hsa-miR-1227-3p	0	0	0	0	0	0	0	0	0	0	0	0	0	0	0	0	0	0	0	0	0
hsa-miR-3929	0	0	0	0	0	0	0	0	0	0	0	0	0	0	0	0	0	0	0	0	0
hsa-miR-640	0	0	0	0	0	0	0	0	0	0	0	0	0	0	0	0	0	0	0	0	0
hsa-miR-631	0	0	0	0	0	0	0	0	0	0	0	0	0	0	0	0	0	0	0	0	0
hsa-miR-1224-3p	0	0	0	0	0	0	0	0	0	0	0	0	0	0	0	0	0	0	0	0	0
hsa-miR-4500	0	0	0	0	0	0	0	0	0	0	0	0	0	0	0	0	0	0	0	0	0
hsa-miR-4266	0	0	0	0	0	0	0	0	0	0	0	0	0	0	0	0	0	0	0	0	0
hsa-miR-525-3p	0	0	0	0	0	0	0	0	0	0	0	0	0	0	0	0	0	0	0	0	0
hsa-miR-4273	0	0	0	0	0	0	0	0	0	0	0	0	0	0	0	0	0	0	0	0	0
hsa-miR-2467-3p	0	0	0	0	0	0	0	0	0	0	0	0	0	0	0	0	0	0	0	0	0
hsa-miR-4466	0	0	0	0	0	0	0	0	0	0	0	0	0	0	0	0	0	0	0	0	0
hsa-miR-4769-3p	0	0	0	0	0	0	0	0	0	0	0	0	0	0	0	0	0	0	0	0	0
hsa-miR-711	0	0	0	0	0	0	0	0	0	0	0	0	0	0	0	0	0	0	0	0	0
hsa-miR-4279	0	0	0	0	0	0	0	0	0	0	0	0	0	0	0	0	0	0	0	0	0
hsa-miR-4425	0	0	0	0	0	0	0	0	0	0	0	0	0	0	0	0	0	0	0	0	0
hsa-miR-4793-5p	0	0	0	0	0	0	0	0	0	0	0	0	0	0	0	0	0	0	0	0	0
hsa-miR-4288	0	0	0	0	0	0	0	0	0	0	0	0	0	0	0	0	0	0	0	0	0
hsa-miR-3674	0	0	0	0	0	0	0	0	0	0	0	0	0	0	0	0	0	0	0	0	0
hsa-miR-1827	0	0	0	0	0	0	0	0	0	0	0	0	0	0	0	0	0	0	0	0	0
hsa-miR-548c-3p	0	0	0	0	0	0	0	0	0	0	0	0	0	0	0	0	0	0	0	0	0
hsa-miR-4308	0	0	0	0	0	0	0	0	0	0	0	0	0	0	0	0	0	0	0	0	0
hsa-miR-6131	0	0	0	0	0	0	0	0	0	0	0	0	0	0	0	0	0	0	0	0	0
hsa-miR-3666	0	0	0	0	0	0	0	0	0	0	0	0	0	0	0	0	0	0	0	0	0
hsa-miR-297	0	0	0	0	0	0	0	0	0	0	0	0	0	0	0	0	0	0	0	0	0
hsa-miR-5583-3p	0	0	0	0	0	0	0	0	0	0	0	0	0	0	0	0	0	0	0	0	0
hsa-miR-6080	0	0	0	0	0	0	0	0	0	0	0	0	0	0	0	0	0	0	0	0	0
hsa-miR-4771	0	0	0	0	0	0	0	0	0	0	0	0	0	0	0	0	0	0	0	0	0
hsa-miR-518d-3p	0	0	0	0	0	0	0	0	0	0	0	0	0	0	0	0	0	0	0	0	0
hsa-miR-4319	0	0	0	0	0	0	0	0	0	0	0	0	0	0	0	0	0	0	0	0	0
hsa-miR-6165	0	0	0	0	0	0	0	0	0	0	0	0	0	0	0	0	0	0	0	0	0
hsa-miR-4639-3p	0	0	0	0	0	0	0	0	0	0	0	0	0	0	0	0	0	0	0	0	0
hsa-miR-3150a-3p	0	0	0	0	0	0	0	0	0	0	0	0	0	0	0	0	0	0	0	0	0
hsa-miR-924	0	0	0	0	0	0	0	0	0	0	0	0	0	0	0	0	0	0	0	0	0
hsa-miR-1234-5p	0	0	0	0	0	0	0	0	0	0	0	0	0	0	0	0	0	0	0	0	0
hsa-miR-888-3p	0	0	0	0	0	0	0	0	0	0	0	0	0	0	0	0	0	0	0	0	0
hsa-miR-3115	0	0	0	0	0	0	0	0	0	0	0	0	0	0	0	0	0	0	0	0	0
hsa-miR-5003-5p	0	0	0	0	0	0	0	0	0	0	0	0	0	0	0	0	0	0	0	0	0
[truncated: 45 more rows]
