# Supplementary material for: Prostate cancer small non-coding RNA transcriptome in Arabs
Source: J Transl Med. 2017 Dec 21;15:260. doi: 10.1186/s12967-017-1362-x (PMC5740966; doi:10.1186/s12967-017-1362-x)
Supplement: Supplementary file 3 — Additional file 3. miRNA expression comparison in each pair of PCa samples. [file 12967_2017_1362_MOESM3_ESM.xlsx]

## Sheet: Table discription
Table S5 miRNA expression comparison in each pair of PCa samples
Sample name-std	Normalized expression level of miRNA in this sample
sig-lablel	Significance label. **: fold_change(log2)>1 or fold change(log2)<-1, and p-value<0.01; *: fold_change(log2)>1 or fold change(log2)<-1, and 0.01<= p-value<0.05

## Sheet: Q1N-Q1T
pairwise	miR-name	Q1N-std	Q1T-std	fold-change(log2 Q1T/Q1N)	p-value	sig-lable
Q1N-Q1T	hsa-let-7a-3p	1.4853	0.394	-1.91449	1.72345e-05	**
Q1N-Q1T	hsa-let-7a-5p	8857.54	21193.4	1.25864	0	**
Q1N-Q1T	hsa-let-7b-3p	2.334	0.1433	-4.02569	1.30473e-15	**
Q1N-Q1T	hsa-let-7b-5p	3365.21	3554.12	0.0787956	2.21681e-33
Q1N-Q1T	hsa-let-7c	6146.92	7039.69	0.195648	0
Q1N-Q1T	hsa-let-7d-3p	151.252	72.2809	-1.06527	4.64739e-176	**
Q1N-Q1T	hsa-let-7d-5p	469.034	613.206	0.386678	9.48667e-120
Q1N-Q1T	hsa-let-7e-3p	3.9254	1.6835	-1.22138	4.05813e-07	**
Q1N-Q1T	hsa-let-7e-5p	3109.74	1597.34	-0.96112	0
Q1N-Q1T	hsa-let-7f-5p	7293	11214.3	0.620749	0
Q1N-Q1T	hsa-let-7g-5p	1404.59	1835	0.385627	0
Q1N-Q1T	hsa-let-7i-3p	2.6877	0.3224	-3.05945	2.06893e-14	**
Q1N-Q1T	hsa-let-7i-5p	2770.78	1544.48	-0.843173	0
Q1N-Q1T	hsa-miR-1	1.6267	3.1878	0.970613	0.000150254
Q1N-Q1T	hsa-miR-100-3p	2.0865	0.5373	-1.95729	2.12073e-07	**
Q1N-Q1T	hsa-miR-100-5p	23395.1	18990.4	-0.300938	0
Q1N-Q1T	hsa-miR-101-3p	235.101	185.968	-0.338228	5.61244e-37
Q1N-Q1T	hsa-miR-101-5p	1.1317	0.5373	-1.07469	0.0150096	*
Q1N-Q1T	hsa-miR-103a-3p	599.174	907.165	0.59839	0
Q1N-Q1T	hsa-miR-106a-5p	1.2377	11.5334	3.22008	2.54495e-60	**
Q1N-Q1T	hsa-miR-106b-3p	57.5374	44.4861	-0.371145	7.08133e-12
Q1N-Q1T	hsa-miR-106b-5p	4.8449	5.5518	0.196489	0.245708
Q1N-Q1T	hsa-miR-107	183.893	129.124	-0.510109	8.81134e-61
Q1N-Q1T	hsa-miR-10a-3p	1.5207	0.7164	-1.0859	0.00433263	**
Q1N-Q1T	hsa-miR-10a-5p	6269.39	11683.8	0.898113	0
Q1N-Q1T	hsa-miR-10b-3p	4.2083	5.122	0.28347	0.113211
Q1N-Q1T	hsa-miR-10b-5p	57706.4	99750.3	0.78959	0
Q1N-Q1T	hsa-miR-1180	42.0479	17.8732	-1.23424	3.47442e-63	**
Q1N-Q1T	hsa-miR-1247-3p	10.5739	2.5431	-2.05585	5.63176e-34	**
Q1N-Q1T	hsa-miR-1247-5p	67.1211	27.4725	-1.28878	1.29812e-106	**
Q1N-Q1T	hsa-miR-1249	1.0256	0.6089	-0.752191	0.0866843
Q1N-Q1T	hsa-miR-1254	1.0256	0.2507	-2.03243	0.000221843	**
Q1N-Q1T	hsa-miR-125a-3p	10.2202	5.2294	-0.966706	1.21002e-11
Q1N-Q1T	hsa-miR-125a-5p	12539.7	47476.7	1.92072	0	**
Q1N-Q1T	hsa-miR-125b-1-3p	355.445	87.7186	-2.01867	0	**
Q1N-Q1T	hsa-miR-125b-2-3p	1069.41	796.093	-0.425807	1.82084e-247
Q1N-Q1T	hsa-miR-125b-5p	4362.69	10093.9	1.21019	0	**
Q1N-Q1T	hsa-miR-1262	2.7584	3.546	0.362361	0.0968693
Q1N-Q1T	hsa-miR-126-3p	117.303	89.2945	-0.393594	4.54289e-25
Q1N-Q1T	hsa-miR-126-5p	1050.99	463.558	-1.18092	0	**
Q1N-Q1T	hsa-miR-1268a	1.6267	0.5731	-1.50509	0.000143291	**
Q1N-Q1T	hsa-miR-1268b	1.6267	0.5731	-1.50509	0.000143291	**
Q1N-Q1T	hsa-miR-1270	3.395	4.4414	0.387603	0.0476921
Q1N-Q1T	hsa-miR-1271-5p	55.8753	56.127	0.00648428	0.899589
Q1N-Q1T	hsa-miR-127-3p	3717.9	1525.28	-1.28542	0	**
Q1N-Q1T	hsa-miR-1275	1.556	0.1075	-3.85543	1.71558e-10	**
Q1N-Q1T	hsa-miR-128	43.8515	42.1579	-0.0568232	0.333254
Q1N-Q1T	hsa-miR-1285-3p	1.8036	0.6805	-1.40621	0.000139268	**
Q1N-Q1T	hsa-miR-1287	1.6267	1.4685	-0.147605	0.636463
Q1N-Q1T	hsa-miR-1291	1.4499	3.3311	1.20005	4.13707e-06	**
Q1N-Q1T	hsa-miR-129-5p	2.2633	1.2895	-0.811616	0.00617663
Q1N-Q1T	hsa-miR-1296	60.897	34.7794	-0.808138	5.46003e-46
Q1N-Q1T	hsa-miR-1298	0.5658	1.1462	1.01849	0.0189149	*
Q1N-Q1T	hsa-miR-1299	7.4972	6.9845	-0.102195	0.476038
Q1N-Q1T	hsa-miR-1301	15.8431	9.2411	-0.777718	2.21221e-12
Q1N-Q1T	hsa-miR-1303	1.3438	0.7522	-0.83713	0.0309776
Q1N-Q1T	hsa-miR-1304-3p	3.1828	6.304	0.985971	6.22842e-08
Q1N-Q1T	hsa-miR-1306-5p	1.0256	0.8238	-0.316102	0.437092
Q1N-Q1T	hsa-miR-1307-3p	47.5647	36.2121	-0.393419	4.6455e-11
Q1N-Q1T	hsa-miR-1307-5p	19.521	1.182	-4.04573	2.30561e-121	**
Q1N-Q1T	hsa-miR-130a-3p	488.697	356.068	-0.456787	9.89567e-130
Q1N-Q1T	hsa-miR-130b-3p	9.5129	8.4173	-0.176528	0.170698
Q1N-Q1T	hsa-miR-130b-5p	0.4951	5.0862	3.3608	1.84922e-28	**
Q1N-Q1T	hsa-miR-132-3p	13.2969	17.4434	0.391591	7.23458e-05
Q1N-Q1T	hsa-miR-132-5p	3.6071	2.364	-0.609609	0.00702252
Q1N-Q1T	hsa-miR-133a	458.178	513.739	0.165129	3.39127e-21
Q1N-Q1T	hsa-miR-133b	11.069	5.1936	-1.09172	6.33731e-15	**
Q1N-Q1T	hsa-miR-134	12.8372	5.1936	-1.30552	3.7449e-22	**
Q1N-Q1T	hsa-miR-1343	2.7584	3.7251	0.433447	0.0443673
Q1N-Q1T	hsa-miR-135a-5p	0.389	3.6893	3.24551	2.10382e-20	**
Q1N-Q1T	hsa-miR-136-3p	8.1337	3.3669	-1.27249	4.47784e-14	**
Q1N-Q1T	hsa-miR-136-5p	2.4048	0.5731	-2.06906	7.36166e-09	**
Q1N-Q1T	hsa-miR-138-5p	2.2279	0.394	-2.49942	4.36295e-10	**
Q1N-Q1T	hsa-miR-139-3p	4.3498	1.97	-1.14275	4.1868e-07	**
Q1N-Q1T	hsa-miR-139-5p	11.2458	4.6922	-1.26105	1.1889e-18	**
Q1N-Q1T	hsa-miR-140-3p	231.423	165.265	-0.485752	1.12843e-69
Q1N-Q1T	hsa-miR-140-5p	1.4499	1.6118	0.152719	0.62544
Q1N-Q1T	hsa-miR-141-3p	316.297	1546.3	2.28947	0	**
Q1N-Q1T	hsa-miR-141-5p	1.2024	4.9787	2.04985	8.95147e-17	**
Q1N-Q1T	hsa-miR-142-3p	3.0413	1.1462	-1.40783	6.69525e-07	**
Q1N-Q1T	hsa-miR-142-5p	211.407	41.8356	-2.33722	0	**
Q1N-Q1T	hsa-miR-143-3p	379997	178276	-1.09188	0	**
Q1N-Q1T	hsa-miR-143-5p	94.8466	61.9653	-0.614136	2.5477e-44
Q1N-Q1T	hsa-miR-144-3p	5.7997	0.6447	-3.16928	1.62461e-30	**
Q1N-Q1T	hsa-miR-144-5p	2.8645	0.9671	-1.56655	1.797e-07	**
Q1N-Q1T	hsa-miR-145-3p	928.096	642.756	-0.530003	2.87941458396278e-320
Q1N-Q1T	hsa-miR-145-5p	1786.56	1676.25	-0.0919455	2.88319e-23
Q1N-Q1T	hsa-miR-1468	10.9275	94.5956	3.11381	0	**
Q1N-Q1T	hsa-miR-146a-5p	227.533	363.375	0.675384	1.2653e-194
Q1N-Q1T	hsa-miR-146b-3p	31.5448	20.5238	-0.620104	4.61453e-16
Q1N-Q1T	hsa-miR-146b-5p	1947.29	1477.71	-0.398103	0
Q1N-Q1T	hsa-miR-148a-3p	1231.52	5989.76	2.28206	0	**
Q1N-Q1T	hsa-miR-148a-5p	19.0613	151.475	2.99036	0	**
Q1N-Q1T	hsa-miR-148b-3p	23.9415	39.2925	0.71474	8.36592e-25
Q1N-Q1T	hsa-miR-148b-5p	2.4755	4.2624	0.783946	0.00025126
Q1N-Q1T	hsa-miR-149-5p	26.806	79.6953	1.57194	5.71045e-170	**
Q1N-Q1T	hsa-miR-150-3p	10.2202	0.7164	-3.83451	8.45752e-62	**
Q1N-Q1T	hsa-miR-150-5p	388.687	67.9828	-2.51537	0	**
Q1N-Q1T	hsa-miR-151a-3p	1590.22	2129.28	0.42114	0
Q1N-Q1T	hsa-miR-151a-5p	1710.95	2597.03	0.602063	0
Q1N-Q1T	hsa-miR-151b	108.497	128.981	0.249502	1.78521e-12
Q1N-Q1T	hsa-miR-152	33.1715	26.2189	-0.339337	1.70852e-06
Q1N-Q1T	hsa-miR-155-5p	143.543	220.604	0.619974	1.91632e-102
Q1N-Q1T	hsa-miR-15a-5p	35.3288	35.8539	0.0212853	0.741365
Q1N-Q1T	hsa-miR-15b-3p	1.1317	0.01	-6.82235	2.87181e-10	**
Q1N-Q1T	hsa-miR-15b-5p	33.1008	56.9866	0.783757	4.59009e-41
Q1N-Q1T	hsa-miR-16-2-3p	4.3498	3.152	-0.464682	0.0205794
Q1N-Q1T	hsa-miR-16-5p	864.334	1000.72	0.21138	5.78291e-63
Q1N-Q1T	hsa-miR-17-3p	2.2279	2.1491	-0.0519519	0.842985
Q1N-Q1T	hsa-miR-17-5p	5.9058	19.0194	1.68727	3.04399e-46	**
Q1N-Q1T	hsa-miR-181a-2-3p	11.3519	27.0069	1.25039	4.29052e-42	**
Q1N-Q1T	hsa-miR-181a-3p	4.2437	4.4773	0.0773063	0.675345
Q1N-Q1T	hsa-miR-181a-5p	6449.35	10516.5	0.705426	0
Q1N-Q1T	hsa-miR-181b-5p	469.635	463.88	-0.0177889	0.318101
Q1N-Q1T	hsa-miR-181c-3p	12.7664	13.6109	0.0924107	0.383614
Q1N-Q1T	hsa-miR-181c-5p	259.962	372.652	0.519529	2.26221e-125
Q1N-Q1T	hsa-miR-181d	159.669	89.9035	-0.828635	1.08697e-122
Q1N-Q1T	hsa-miR-182-5p	1822.84	5850.1	1.68227	0	**
Q1N-Q1T	hsa-miR-183-3p	0.6719	1.5044	1.16287	0.00268255	**
Q1N-Q1T	hsa-miR-183-5p	415.458	1379.36	1.73122	0	**
Q1N-Q1T	hsa-miR-184	12.9786	4.9429	-1.39271	1.52173e-24	**
Q1N-Q1T	hsa-miR-185-3p	1.6267	0.788	-1.04568	0.00419056	**
Q1N-Q1T	hsa-miR-185-5p	2.334	1.4327	-0.704068	0.0139578
Q1N-Q1T	hsa-miR-186-5p	1033.16	1297.26	0.328401	2.52215e-185
Q1N-Q1T	hsa-miR-190b	1.2377	0.7522	-0.718473	0.0698411
Q1N-Q1T	hsa-miR-191-3p	0.8487	1.576	0.892941	0.0133283
Q1N-Q1T	hsa-miR-191-5p	22704.8	50925.9	1.1654	0	**
Q1N-Q1T	hsa-miR-192-5p	110.088	176.082	0.677582	7.2063e-96
Q1N-Q1T	hsa-miR-193a-5p	7.9569	6.4831	-0.295523	0.0399693
Q1N-Q1T	hsa-miR-193b-3p	99.4085	81.916	-0.279224	5.59801e-12
Q1N-Q1T	hsa-miR-193b-5p	21.855	2.2565	-3.2758	3.36802e-114	**
Q1N-Q1T	hsa-miR-194-5p	4.173	6.5547	0.651445	0.000111329
Q1N-Q1T	hsa-miR-195-3p	25.5329	20.8103	-0.29506	0.000234992
Q1N-Q1T	hsa-miR-195-5p	108.745	121.316	0.157824	1.11118e-05
Q1N-Q1T	hsa-miR-196a-5p	9.4069	7.8442	-0.262093	0.046294
Q1N-Q1T	hsa-miR-196b-5p	130.034	221.571	0.76888	2.16857e-149
Q1N-Q1T	hsa-miR-197-3p	27.973	40.367	0.529141	1.60834e-15
Q1N-Q1T	hsa-miR-199a-3p	1338.21	878.081	-0.607882	0
Q1N-Q1T	hsa-miR-199a-5p	125.047	95.706	-0.385795	1.05853e-25
Q1N-Q1T	hsa-miR-199b-3p	1337.86	877.58	-0.608325	0
Q1N-Q1T	hsa-miR-199b-5p	30.1656	28.0098	-0.106973	0.134242
Q1N-Q1T	hsa-miR-19a-3p	3.4303	6.1249	0.836352	3.42174e-06
Q1N-Q1T	hsa-miR-19b-3p	60.897	80.0893	0.395238	9.38961e-18
Q1N-Q1T	hsa-miR-200a-3p	15.8785	77.0806	2.27929	2.63671e-270	**
Q1N-Q1T	hsa-miR-200a-5p	0.9902	5.6593	2.51483	8.48316e-24	**
Q1N-Q1T	hsa-miR-200b-3p	99.5854	659.877	2.72819	0	**
Q1N-Q1T	hsa-miR-200b-5p	4.4912	24.4996	2.44759	8.1918e-95	**
Q1N-Q1T	hsa-miR-200c-3p	93.4674	781.444	3.06361	0	**
Q1N-Q1T	hsa-miR-203a	19.5917	66.2635	1.75797	7.17676e-166	**
Q1N-Q1T	hsa-miR-204-5p	720.155	195.28	-1.88276	0	**
Q1N-Q1T	hsa-miR-205-5p	165.752	3792.6	4.51609	0	**
Q1N-Q1T	hsa-miR-20a-5p	6.5424	16.4763	1.3325	6.92243e-29	**
Q1N-Q1T	hsa-miR-20b-5p	4.7034	18.6971	1.99104	1.23678e-56	**
Q1N-Q1T	hsa-miR-210	5.8704	5.7667	-0.0257128	0.872551
Q1N-Q1T	hsa-miR-2110	7.674	2.7222	-1.49521	1.17097e-16	**
Q1N-Q1T	hsa-miR-212-3p	5.4461	3.7251	-0.547944	0.00258504
Q1N-Q1T	hsa-miR-212-5p	12.0592	12.1423	0.00990752	0.928392
Q1N-Q1T	hsa-miR-21-3p	381.473	138.079	-1.46609	0	**
Q1N-Q1T	hsa-miR-214-3p	77.1291	51.793	-0.574518	1.86691e-32
Q1N-Q1T	hsa-miR-214-5p	8.3106	7.486	-0.150758	0.272178
Q1N-Q1T	hsa-miR-21-5p	6161.67	2735.25	-1.17165	0	**
Q1N-Q1T	hsa-miR-218-1-3p	23.8001	17.4076	-0.45125	1.25475e-07
Q1N-Q1T	hsa-miR-218-5p	26.0634	10.4947	-1.31236	1.1926e-43	**
Q1N-Q1T	hsa-miR-219-1-3p	0.7426	2.1133	1.50884	1.31046e-05	**
Q1N-Q1T	hsa-miR-221-3p	2262.84	1010.29	-1.16337	0	**
Q1N-Q1T	hsa-miR-221-5p	104.183	78.4775	-0.408765	5.78077e-24
Q1N-Q1T	hsa-miR-222-3p	2844.12	2262.63	-0.329984	0
Q1N-Q1T	hsa-miR-223-3p	10.2556	3.1878	-1.68578	1.37347e-25	**
Q1N-Q1T	hsa-miR-223-5p	1.0963	0.6089	-0.848365	0.0493118
Q1N-Q1T	hsa-miR-22-3p	17394.2	15317.7	-0.183407	0
Q1N-Q1T	hsa-miR-224-3p	3.7132	2.7938	-0.410434	0.0565616
Q1N-Q1T	hsa-miR-224-5p	53.3291	67.8753	0.347964	2.35152e-12
Q1N-Q1T	hsa-miR-22-5p	3.006	1.1462	-1.39099	9.78845e-07	**
Q1N-Q1T	hsa-miR-2277-5p	1.945	1.182	-0.71854	0.0224973
Q1N-Q1T	hsa-miR-23a-3p	237.258	292.204	0.30052	8.67844e-37
Q1N-Q1T	hsa-miR-23b-3p	641.859	706.906	0.139263	5.96593e-21
Q1N-Q1T	hsa-miR-23b-5p	5.2339	1.3969	-1.90566	4.80531e-16	**
Q1N-Q1T	hsa-miR-24-1-5p	2.0511	1.3969	-0.554169	0.062798
Q1N-Q1T	hsa-miR-24-2-5p	4.1022	2.758	-0.572775	0.00653323
Q1N-Q1T	hsa-miR-24-3p	506.167	269.316	-0.91031	0
Q1N-Q1T	hsa-miR-2467-5p	1.0256	0.0716	-3.84036	2.9455e-07	**
Q1N-Q1T	hsa-miR-25-3p	500.968	791.007	0.658972	0
Q1N-Q1T	hsa-miR-25-5p	4.1376	6.0891	0.557435	0.00119909
Q1N-Q1T	hsa-miR-26a-5p	16139	21630.2	0.4225	0
Q1N-Q1T	hsa-miR-26b-3p	5.9412	11.8558	0.996767	6.53432e-14
Q1N-Q1T	hsa-miR-26b-5p	763.9	1391.03	0.864699	0
Q1N-Q1T	hsa-miR-27a-3p	271.526	105.234	-1.36749	0	**
Q1N-Q1T	hsa-miR-27a-5p	1.9097	0.3582	-2.41451	1.56816e-08	**
Q1N-Q1T	hsa-miR-27b-3p	17147	13670.5	-0.326889	0
Q1N-Q1T	hsa-miR-27b-5p	70.021	58.9208	-0.249011	2.17958e-07
Q1N-Q1T	hsa-miR-28-3p	4600.34	3996.05	-0.203167	1.03385e-261
Q1N-Q1T	hsa-miR-28-5p	119.177	131.846	0.145752	2.2399e-05
Q1N-Q1T	hsa-miR-296-3p	1.0609	0.1791	-2.56645	1.52647e-05	**
Q1N-Q1T	hsa-miR-29a-3p	266.999	310.722	0.21879	5.04193e-22
Q1N-Q1T	hsa-miR-29b-2-5p	1.167	1.4685	0.331539	0.327599
Q1N-Q1T	hsa-miR-29b-3p	9.9727	6.1965	-0.686531	5.95513e-07
Q1N-Q1T	hsa-miR-29c-3p	42.0833	56.9508	0.436468	2.1249e-15
Q1N-Q1T	hsa-miR-29c-5p	2.8645	5.2653	0.878232	7.22822e-06
Q1N-Q1T	hsa-miR-301a-3p	12.1299	4.6922	-1.37023	1.62006e-22	**
Q1N-Q1T	hsa-miR-3065-3p	0.5658	1.7551	1.63319	2.66175e-05	**
Q1N-Q1T	hsa-miR-3065-5p	0.3536	1.1104	1.65089	0.000812894	**
Q1N-Q1T	hsa-miR-30a-3p	109.558	118.128	0.108657	0.00260509
Q1N-Q1T	hsa-miR-30a-5p	3378.94	3712.69	0.135896	5.00311e-98
Q1N-Q1T	hsa-miR-30b-5p	42.8259	32.1288	-0.414616	5.47177e-11
Q1N-Q1T	hsa-miR-30c-1-3p	21.5721	19.4492	-0.149456	0.0790773
Q1N-Q1T	hsa-miR-30c-2-3p	29.3876	37.3941	0.347603	2.00575e-07
Q1N-Q1T	hsa-miR-30c-5p	81.7972	70.096	-0.222719	4.80794e-07
Q1N-Q1T	hsa-miR-30d-3p	3.8547	6.698	0.797112	3.15009e-06
Q1N-Q1T	hsa-miR-30d-5p	1601.43	3324.89	1.05395	0	**
Q1N-Q1T	hsa-miR-30e-3p	46.9282	71.4213	0.605899	4.63092e-33
Q1N-Q1T	hsa-miR-30e-5p	243.411	364.234	0.581472	7.48998e-150
Q1N-Q1T	hsa-miR-3126-5p	1.5914	0.8596	-0.888559	0.0133915
Q1N-Q1T	hsa-miR-3127-5p	1.8036	0.2507	-2.84685	1.81196e-09	**
Q1N-Q1T	hsa-miR-3158-3p	1.6621	1.0745	-0.629342	0.0608992
Q1N-Q1T	hsa-miR-31-5p	25.6036	43.4115	0.761731	3.07033e-30
Q1N-Q1T	hsa-miR-3180	1.7682	0.0716	-4.62618	4.34365e-13	**
Q1N-Q1T	hsa-miR-3180-3p	1.7682	0.0716	-4.62618	4.34365e-13	**
Q1N-Q1T	hsa-miR-320a	1974.59	574.523	-1.78112	0	**
Q1N-Q1T	hsa-miR-320b	286.555	53.7988	-2.41317	0	**
Q1N-Q1T	hsa-miR-320c	5.9058	2.0416	-1.53243	1.39193e-13	**
Q1N-Q1T	hsa-miR-320d	3.501	1.6835	-1.0563	2.07549e-05	**
Q1N-Q1T	hsa-miR-323b-3p	1.556	0.3582	-2.119	2.57744e-06	**
Q1N-Q1T	hsa-miR-324-3p	4.7742	4.3698	-0.127692	0.479732
Q1N-Q1T	hsa-miR-324-5p	2.4048	1.6118	-0.577244	0.0364434
Q1N-Q1T	hsa-miR-328	167.52	58.6342	-1.51452	0	**
Q1N-Q1T	hsa-miR-330-3p	2.334	1.4327	-0.704068	0.0139578
Q1N-Q1T	hsa-miR-330-5p	1.6267	1.182	-0.460718	0.162105
Q1N-Q1T	hsa-miR-331-3p	3.5364	0.2865	-3.62567	2.29407e-21	**
Q1N-Q1T	hsa-miR-331-5p	5.6936	2.2924	-1.31248	1.03526e-10	**
Q1N-Q1T	hsa-miR-335-3p	4.0669	9.9216	1.28664	3.82581e-17	**
Q1N-Q1T	hsa-miR-335-5p	2.5462	5.91	1.21481	5.48482e-10	**
Q1N-Q1T	hsa-miR-338-3p	19.0259	8.0233	-1.2457	6.3327e-30	**
Q1N-Q1T	hsa-miR-338-5p	6.5424	4.2624	-0.618154	0.000231343
Q1N-Q1T	hsa-miR-339-3p	14.8529	16.6912	0.168343	0.0827944
Q1N-Q1T	hsa-miR-339-5p	5.729	1.8625	-1.62104	3.22713e-14	**
Q1N-Q1T	hsa-miR-340-3p	0.9548	1.5044	0.655918	0.0641741
Q1N-Q1T	hsa-miR-340-5p	30.1302	31.9498	0.0845966	0.22095
Q1N-Q1T	hsa-miR-342-3p	463.871	437.59	-0.0841449	3.48649e-06
Q1N-Q1T	hsa-miR-342-5p	45.5136	10.7813	-2.07777	1.49313e-142	**
Q1N-Q1T	hsa-miR-345-5p	77.5889	63.7562	-0.283285	6.80592e-10
Q1N-Q1T	hsa-miR-34a-5p	55.8753	50.217	-0.154035	0.00359483
Q1N-Q1T	hsa-miR-34c-5p	5.4461	4.9787	-0.129454	0.444073
Q1N-Q1T	hsa-miR-3605-3p	4.3852	17.6941	2.01255	1.98648e-54	**
Q1N-Q1T	hsa-miR-3605-5p	32.535	23.1027	-0.493931	1.87857e-11
Q1N-Q1T	hsa-miR-3609	0.0707	1.3969	4.30437	3.22139e-10	**
Q1N-Q1T	hsa-miR-3613-5p	1.8743	5.2294	1.48029	1.11644e-11	**
Q1N-Q1T	hsa-miR-361-3p	23.0574	34.7794	0.593003	2.4542e-16
Q1N-Q1T	hsa-miR-3615	6.0473	4.0833	-0.566556	0.0010633
Q1N-Q1T	hsa-miR-361-5p	163.771	190.051	0.214704	1.27081e-13
Q1N-Q1T	hsa-miR-3617-5p	1.2377	0.0716	-4.11156	6.70558e-09	**
Q1N-Q1T	hsa-miR-3622a-5p	2.0158	0.5731	-1.81449	1.26842e-06	**
Q1N-Q1T	hsa-miR-362-5p	1.1317	2.3282	1.04072	0.000612317	**
Q1N-Q1T	hsa-miR-363-3p	210.912	667.9	1.66299	0	**
Q1N-Q1T	hsa-miR-365a-3p	36.8494	48.1395	0.38558	7.99831e-11
Q1N-Q1T	hsa-miR-365a-5p	2.9706	0.2865	-3.37415	3.69819e-17	**
Q1N-Q1T	hsa-miR-365b-3p	36.8494	48.1395	0.38558	7.99831e-11
Q1N-Q1T	hsa-miR-365b-5p	3.9608	1.2178	-1.70151	6.90353e-11	**
Q1N-Q1T	hsa-miR-3679-5p	1.3438	0.2507	-2.42228	2.2498e-06	**
Q1N-Q1T	hsa-miR-369-5p	2.2987	0.8955	-1.36005	2.64816e-05	**
Q1N-Q1T	hsa-miR-370	7.9216	2.8296	-1.48519	5.42242e-17	**
Q1N-Q1T	hsa-miR-374a-3p	10.008	5.0862	-0.976494	1.33675e-11
Q1N-Q1T	hsa-miR-374a-5p	17.8589	13.6467	-0.388091	6.88377e-05
Q1N-Q1T	hsa-miR-374b-3p	1.3438	1.4327	0.0924181	0.778209
Q1N-Q1T	hsa-miR-374b-5p	29.2815	24.428	-0.261454	0.000446549
Q1N-Q1T	hsa-miR-375	1556.16	21381.3	3.78028	0	**
Q1N-Q1T	hsa-miR-377-5p	1.4146	0.5015	-1.49607	0.000423992	**
Q1N-Q1T	hsa-miR-378a-3p	760.93	1008.67	0.406625	1.08953e-214
Q1N-Q1T	hsa-miR-378a-5p	1.8389	2.3998	0.384071	0.149851
Q1N-Q1T	hsa-miR-378c	11.1043	10.3514	-0.101293	0.389539
Q1N-Q1T	hsa-miR-378d	3.5364	2.8296	-0.321683	0.138683
Q1N-Q1T	hsa-miR-379-5p	2.7584	1.7551	-0.652278	0.0123932
Q1N-Q1T	hsa-miR-381-3p	23.7293	12.6796	-0.90416	1.44603e-22
Q1N-Q1T	hsa-miR-382-5p	1.6621	0.3582	-2.21417	5.76625e-07	**
Q1N-Q1T	hsa-miR-383	3.112	0.8955	-1.79708	1.98289e-09	**
Q1N-Q1T	hsa-miR-3909	5.5168	5.6234	0.027611	0.865383
Q1N-Q1T	hsa-miR-3912	1.167	0.7522	-0.633616	0.115316
Q1N-Q1T	hsa-miR-3938	0.3183	1.4685	2.20588	2.7343e-06	**
Q1N-Q1T	hsa-miR-409-3p	123.067	55.6613	-1.1447	4.31719e-161	**
Q1N-Q1T	hsa-miR-409-5p	31.7923	18.8045	-0.757599	2.33879e-22
Q1N-Q1T	hsa-miR-410	24.5781	9.5993	-1.35637	2.57056e-43	**
Q1N-Q1T	hsa-miR-411-5p	42.4016	21.7058	-0.966038	2.06316e-43
Q1N-Q1T	hsa-miR-421	59.0227	66.2993	0.167724	0.000568546
Q1N-Q1T	hsa-miR-423-3p	586.726	927.331	0.660397	0
Q1N-Q1T	hsa-miR-423-5p	6999.41	1543.83	-2.18072	0	**
Q1N-Q1T	hsa-miR-424-3p	4.6327	2.6147	-0.825208	6.71282e-05
Q1N-Q1T	hsa-miR-424-5p	2.8291	0.2507	-3.49631	7.17701e-17	**
Q1N-Q1T	hsa-miR-425-3p	3.9608	4.4056	0.153547	0.415655
Q1N-Q1T	hsa-miR-425-5p	21.3953	37.1434	0.795812	4.91688e-28
Q1N-Q1T	hsa-miR-4286	3.3596	0.0716	-5.55219	5.56715e-26	**
Q1N-Q1T	hsa-miR-429	9.8666	50.4677	2.35474	9.31162e-185	**
Q1N-Q1T	hsa-miR-431-3p	2.4048	0.6089	-1.98164	1.88433e-08	**
Q1N-Q1T	hsa-miR-432-5p	51.7377	9.3843	-2.46289	5.4556e-199	**
Q1N-Q1T	hsa-miR-4326	0.4597	1.1104	1.27231	0.0058089	**
Q1N-Q1T	hsa-miR-433	2.2279	1.1104	-1.00461	0.00115084	**
Q1N-Q1T	hsa-miR-4485	19.3795	8.8829	-1.12543	3.6944e-26	**
Q1N-Q1T	hsa-miR-450a-5p	1.3792	0.9313	-0.566514	0.120778
Q1N-Q1T	hsa-miR-450b-5p	1.6267	0.8955	-0.861183	0.0148472
Q1N-Q1T	hsa-miR-451a	73.911	25.1443	-1.55556	4.51732e-155	**
Q1N-Q1T	hsa-miR-452-5p	3.8547	5.91	0.61654	0.000477198
Q1N-Q1T	hsa-miR-454-3p	12.5189	10.2798	-0.284296	0.0129612
Q1N-Q1T	hsa-miR-455-3p	2.8291	4.4056	0.638995	0.00186105
Q1N-Q1T	hsa-miR-455-5p	9.4069	9.3127	-0.0145199	0.908569
Q1N-Q1T	hsa-miR-4677-3p	1.4499	1.0029	-0.531776	0.132833
Q1N-Q1T	hsa-miR-4728-3p	1.6975	1.2536	-0.437334	0.173411
Q1N-Q1T	hsa-miR-4786-5p	1.8036	2.0058	0.153298	0.5842
Q1N-Q1T	hsa-miR-4787-3p	1.945	0.2865	-2.76316	7.56033e-10	**
Q1N-Q1T	hsa-miR-483-5p	1.7682	0.0716	-4.62618	4.34365e-13	**
Q1N-Q1T	hsa-miR-484	47.2111	57.5955	0.28683	7.41608e-08
Q1N-Q1T	hsa-miR-485-5p	13.5445	4.9071	-1.46476	1.96697e-27	**
Q1N-Q1T	hsa-miR-486-3p	8.2398	1.3969	-2.56038	1.58212e-34	**
Q1N-Q1T	hsa-miR-486-5p	12232.9	3480.55	-1.81337	0	**
Q1N-Q1T	hsa-miR-487b	3.4657	2.7938	-0.310918	0.15581
Q1N-Q1T	hsa-miR-493-3p	1.7682	1.1104	-0.671202	0.0405688
Q1N-Q1T	hsa-miR-493-5p	18.4954	6.0174	-1.61995	1.81082e-42	**
Q1N-Q1T	hsa-miR-497-5p	63.125	74.4658	0.238367	2.9349e-07
Q1N-Q1T	hsa-miR-500a-3p	265.302	435.62	0.715436	1.58546e-257
Q1N-Q1T	hsa-miR-500a-5p	1.2731	0.8238	-0.62798	0.102438
Q1N-Q1T	hsa-miR-500b	1.2731	0.8238	-0.62798	0.102438
Q1N-Q1T	hsa-miR-5010-5p	2.8999	0.0358	-6.3399	1.48042e-23	**
Q1N-Q1T	hsa-miR-501-3p	525.935	477.276	-0.14006	3.81947e-16
Q1N-Q1T	hsa-miR-502-3p	15.737	17.8016	0.177846	0.0588253
Q1N-Q1T	hsa-miR-504	22.1733	20.488	-0.114044	0.171644
Q1N-Q1T	hsa-miR-505-3p	4.7034	4.7996	0.0292102	0.868492
Q1N-Q1T	hsa-miR-509-3p	1.3792	16.3331	3.5659	1.03252e-92	**
Q1N-Q1T	hsa-miR-511	1.2024	0.9313	-0.368599	0.329862
Q1N-Q1T	hsa-miR-532-3p	7.0021	6.4473	-0.119093	0.42351
Q1N-Q1T	hsa-miR-532-5p	104.961	140.694	0.422706	9.68769e-34
Q1N-Q1T	hsa-miR-541-3p	1.6621	0.2149	-2.95127	4.25943e-09	**
Q1N-Q1T	hsa-miR-548k	3.1828	3.8684	0.28144	0.17183
Q1N-Q1T	hsa-miR-548o-3p	0.7426	1.182	0.670573	0.0950387
Q1N-Q1T	hsa-miR-550a-5p	5.3046	3.1162	-0.767456	6.10312e-05
Q1N-Q1T	hsa-miR-561-5p	1.2377	1.2536	0.0184154	0.95699
Q1N-Q1T	hsa-miR-574-3p	105.102	180.738	0.782109	7.86123e-126
Q1N-Q1T	hsa-miR-574-5p	41.9418	16.2972	-1.36376	2.83347e-73	**
Q1N-Q1T	hsa-miR-577	2.2633	1.3611	-0.733655	0.0121034
Q1N-Q1T	hsa-miR-582-3p	6.896	7.5218	0.125318	0.382691
Q1N-Q1T	hsa-miR-582-5p	1.2731	1.7193	0.433476	0.173407
Q1N-Q1T	hsa-miR-584-5p	5.7644	2.2924	-1.33031	5.03663e-11	**
Q1N-Q1T	hsa-miR-589-5p	9.4776	23.9981	1.34033	1.11538e-41	**
Q1N-Q1T	hsa-miR-598	4.951	5.0145	0.0183859	0.914782
Q1N-Q1T	hsa-miR-615-3p	1.4499	2.5073	0.790181	0.0047858
Q1N-Q1T	hsa-miR-625-5p	2.1926	2.5431	0.213946	0.394643
Q1N-Q1T	hsa-miR-628-3p	11.8823	11.3543	-0.0655754	0.562075
Q1N-Q1T	hsa-miR-628-5p	1.8036	1.2178	-0.566602	0.0753596
Q1N-Q1T	hsa-miR-629-5p	12.4128	10.1365	-0.292269	0.0110817
Q1N-Q1T	hsa-miR-641	1.8036	1.3611	-0.406106	0.189905
Q1N-Q1T	hsa-miR-6507-5p	2.2279	0.3224	-2.78876	3.38013e-11	**
Q1N-Q1T	hsa-miR-6510-3p	0.1061	23.1385	7.76873	3.18078e-190	**
Q1N-Q1T	hsa-miR-6511a-3p	3.2535	1.8984	-0.777209	0.00153095
Q1N-Q1T	hsa-miR-6511b-3p	5.1985	2.4356	-1.09382	9.12318e-08	**
Q1N-Q1T	hsa-miR-6515-5p	1.0256	0.394	-1.3802	0.00490645	**
Q1N-Q1T	hsa-miR-652-3p	13.3676	7.7725	-0.78229	9.15482e-11
Q1N-Q1T	hsa-miR-654-3p	11.3519	13.5751	0.258029	0.0182524
Q1N-Q1T	hsa-miR-654-5p	6.3302	1.7551	-1.8507	2.01654e-18	**
Q1N-Q1T	hsa-miR-659-5p	0.6012	1.2178	1.01836	0.0154722	*
Q1N-Q1T	hsa-miR-660-5p	18.9198	15.9032	-0.25058	0.00674504
Q1N-Q1T	hsa-miR-664a-3p	10.1495	4.9787	-1.02757	1.20069e-12	**
Q1N-Q1T	hsa-miR-664a-5p	7.1436	7.9516	0.154594	0.270604
Q1N-Q1T	hsa-miR-664b-3p	1.0256	0.2507	-2.03243	0.000221843	**
Q1N-Q1T	hsa-miR-664b-5p	1.167	0.2149	-2.44107	1.00163e-05	**
Q1N-Q1T	hsa-miR-671-3p	30.5192	98.3565	1.6883	9.2156e-232	**
Q1N-Q1T	hsa-miR-671-5p	0.7073	1.3969	0.981835	0.0117428
Q1N-Q1T	hsa-miR-6716-3p	1.6975	1.576	-0.107144	0.724234
Q1N-Q1T	hsa-miR-675-5p	1.0609	0.01	-6.72914	1.13421e-09	**
Q1N-Q1T	hsa-miR-708-3p	1.4499	0.394	-1.87969	2.74703e-05	**
Q1N-Q1T	hsa-miR-708-5p	2.5109	0.6805	-1.88354	2.76497e-08	**
Q1N-Q1T	hsa-miR-744-3p	1.0256	1.2895	0.330344	0.361083
Q1N-Q1T	hsa-miR-744-5p	744.874	137.04	-2.4424	0	**
Q1N-Q1T	hsa-miR-7-5p	0.0707	2.3998	5.08506	2.75956e-18	**
Q1N-Q1T	hsa-miR-760	3.112	0.3582	-3.119	9.13407e-17	**
Q1N-Q1T	hsa-miR-766-3p	1.4146	2.0058	0.503784	0.0910876
Q1N-Q1T	hsa-miR-769-5p	91.3102	63.7921	-0.517398	8.01086e-32
Q1N-Q1T	hsa-miR-873-3p	3.3596	1.3969	-1.26606	1.45549e-06	**
Q1N-Q1T	hsa-miR-873-5p	1.3438	0.4298	-1.64458	0.000236174	**
Q1N-Q1T	hsa-miR-874	81.5497	58.9208	-0.468903	3.70319e-24
Q1N-Q1T	hsa-miR-877-5p	26.1341	1.97	-3.72967	3.10829e-152	**
Q1N-Q1T	hsa-miR-887	21.9611	11.2827	-0.960838	4.39148e-23
Q1N-Q1T	hsa-miR-889	3.1474	0.7164	-2.13532	1.35152e-11	**
Q1N-Q1T	hsa-miR-891a	4.3144	8.9545	1.05345	9.35733e-12	**
Q1N-Q1T	hsa-miR-92a-1-5p	1.0256	1.0029	-0.0322904	0.93438
Q1N-Q1T	hsa-miR-92a-3p	5382.63	7116.56	0.402868	0
Q1N-Q1T	hsa-miR-92b-3p	4406.76	3620.6	-0.283488	0
Q1N-Q1T	hsa-miR-92b-5p	4.7034	0.1433	-5.03659	1.95502e-34	**
Q1N-Q1T	hsa-miR-93-3p	0.7073	2.4356	1.78388	1.29154e-07	**
Q1N-Q1T	hsa-miR-93-5p	132.863	239.946	0.852767	1.01581e-192
Q1N-Q1T	hsa-miR-940	3.3242	0.0716	-5.5369	1.08403e-25	**
Q1N-Q1T	hsa-miR-941	482.048	766.508	0.669122	0
Q1N-Q1T	hsa-miR-95	4.0315	0.9313	-2.114	2.61696e-14	**
Q1N-Q1T	hsa-miR-9-5p	8.3813	9.0978	0.118344	0.363934
Q1N-Q1T	hsa-miR-96-5p	14.6054	43.6265	1.5787	1.73395e-94	**
Q1N-Q1T	hsa-miR-98-5p	191.108	141.589	-0.432677	4.22849e-47
Q1N-Q1T	hsa-miR-99a-3p	23.5171	22.8878	-0.0391314	0.624651
Q1N-Q1T	hsa-miR-99a-5p	7133.01	7199.62	0.0134089	0.00318748
Q1N-Q1T	hsa-miR-99b-3p	15.7017	7.5218	-1.06177	1.06128e-19	**
Q1N-Q1T	hsa-miR-99b-5p	51594.4	45923.1	-0.167994	0

## Sheet: Q2N-Q2T
pairwise	miR-name	Q2N-std	Q2T-std	fold-change(log2 Q2T/Q2N)	p-value	sig-lable
Q2N-Q2T	hsa-let-7a-3p	1.1585	0.6514	-0.830642	0.0275654
Q2N-Q2T	hsa-let-7a-5p	13484.2	28795	1.09454	0	**
Q2N-Q2T	hsa-let-7b-3p	3.8427	1.0067	-1.93249	7.9882e-15	**
Q2N-Q2T	hsa-let-7b-5p	4808.33	6803.42	0.500723	0
Q2N-Q2T	hsa-let-7c	5626.97	10288.2	0.870566	0
Q2N-Q2T	hsa-let-7d-3p	111.184	113.727	0.0326205	0.318731
Q2N-Q2T	hsa-let-7d-5p	315.724	391.752	0.311278	1.52641e-63
Q2N-Q2T	hsa-let-7e-3p	2.3452	1.362	-0.783984	0.00269725
Q2N-Q2T	hsa-let-7e-5p	1834.98	961.63	-0.93221	0
Q2N-Q2T	hsa-let-7f-5p	7588.84	14013.6	0.884873	0
Q2N-Q2T	hsa-let-7g-5p	1263.35	1393.8	0.14177	4.18474e-50
Q2N-Q2T	hsa-let-7i-3p	1.2715	0.4441	-1.51757	0.000183194	**
Q2N-Q2T	hsa-let-7i-5p	1346.22	1345.92	-0.00032057	0.97305
Q2N-Q2T	hsa-miR-100-5p	10207.5	3121.29	-1.70942	0	**
Q2N-Q2T	hsa-miR-101-3p	129.889	137.147	0.0784447	0.00900567
Q2N-Q2T	hsa-miR-103a-3p	741.191	920.326	0.3123	1.3501e-147
Q2N-Q2T	hsa-miR-106a-5p	4.2665	6.6027	0.630003	2.90383e-05
Q2N-Q2T	hsa-miR-106b-3p	59.1664	96.5834	0.706997	2.53444e-70
Q2N-Q2T	hsa-miR-106b-5p	3.7297	8.7642	1.23256	1.94018e-17	**
Q2N-Q2T	hsa-miR-107	325.302	174.04	-0.902365	0
Q2N-Q2T	hsa-miR-10a-3p	0.3956	1.214	1.61765	0.000117598	**
Q2N-Q2T	hsa-miR-10a-5p	4831.76	3627.56	-0.413546	0
Q2N-Q2T	hsa-miR-10b-3p	3.7014	3.3754	-0.133013	0.473463
Q2N-Q2T	hsa-miR-10b-5p	48365.2	38062.1	-0.345618	0
Q2N-Q2T	hsa-miR-1180	10.5109	31.6813	1.59175	7.42651e-86	**
Q2N-Q2T	hsa-miR-1247-3p	3.871	3.6123	-0.0997886	0.580402
Q2N-Q2T	hsa-miR-1247-5p	13.5342	22.5322	0.735379	7.95691e-19
Q2N-Q2T	hsa-miR-1248	0.0848	1.0067	3.56943	3.11394e-08	**
Q2N-Q2T	hsa-miR-1255a	0.3956	2.3687	2.58198	2.49793e-13	**
Q2N-Q2T	hsa-miR-125a-3p	10.1719	4.6486	-1.12972	1.68538e-17	**
Q2N-Q2T	hsa-miR-125a-5p	4908.55	8434.12	0.780939	0
Q2N-Q2T	hsa-miR-125b-1-3p	193.718	110.914	-0.804515	5.88416e-173
Q2N-Q2T	hsa-miR-125b-2-3p	898.177	1269.56	0.499257	0
Q2N-Q2T	hsa-miR-125b-5p	1962.3	6987.53	1.83224	0	**
Q2N-Q2T	hsa-miR-1262	3.5036	3.1681	-0.14522	0.447427
Q2N-Q2T	hsa-miR-126-3p	100.476	92.2606	-0.123059	0.000504956
Q2N-Q2T	hsa-miR-126-5p	493.817	382.514	-0.368461	1.90627e-108
Q2N-Q2T	hsa-miR-1268a	1.0172	1.214	0.255165	0.439559
Q2N-Q2T	hsa-miR-1268b	1.0172	1.214	0.255165	0.439559
Q2N-Q2T	hsa-miR-1270	0.7346	1.5989	1.12205	0.0008101	**
Q2N-Q2T	hsa-miR-1271-5p	24.6668	9.7116	-1.34479	2.83824e-52	**
Q2N-Q2T	hsa-miR-1273d	0.6499	1.4508	1.15856	0.00106918	**
Q2N-Q2T	hsa-miR-127-3p	1462.24	859.569	-0.766491	0
Q2N-Q2T	hsa-miR-1275	0.4238	13.2055	4.96161	3.53658e-116	**
Q2N-Q2T	hsa-miR-128	36.2797	34.4645	-0.0740514	0.204864
Q2N-Q2T	hsa-miR-1285-3p	1.1302	1.4212	0.330531	0.285085
Q2N-Q2T	hsa-miR-1287	1.8648	2.872	0.623035	0.00641085
Q2N-Q2T	hsa-miR-1291	5.0577	26.1148	2.36831	1.36771e-119	**
Q2N-Q2T	hsa-miR-1296	36.1949	69.9949	0.951463	1.80986e-84
Q2N-Q2T	hsa-miR-1299	14.4102	12.4356	-0.212614	0.0251958
Q2N-Q2T	hsa-miR-1301	5.4533	6.6916	0.295222	0.036593
Q2N-Q2T	hsa-miR-1306-5p	1.1867	0.5626	-1.07677	0.0056144	**
Q2N-Q2T	hsa-miR-1307-3p	38.5684	84.6808	1.13462	2.83431e-135	**
Q2N-Q2T	hsa-miR-1307-5p	12.3193	31.1187	1.33686	2.3099e-65	**
Q2N-Q2T	hsa-miR-130a-3p	324.2	142.003	-1.19096	0	**
Q2N-Q2T	hsa-miR-130b-3p	15.0318	32.5991	1.11681	6.42301e-52	**
Q2N-Q2T	hsa-miR-130b-5p	0.7629	13.9161	4.18912	2.08311e-110	**
Q2N-Q2T	hsa-miR-132-3p	14.4667	21.8808	0.59693	3.90932e-13
Q2N-Q2T	hsa-miR-132-5p	2.3169	2.6352	0.185717	0.400468
Q2N-Q2T	hsa-miR-133a	252.856	117.428	-1.10654	0	**
Q2N-Q2T	hsa-miR-133b	5.3685	1.3324	-2.01049	3.88283e-21	**
Q2N-Q2T	hsa-miR-134	5.2272	1.9838	-1.39777	6.13746e-13	**
Q2N-Q2T	hsa-miR-1343	1.1867	7.5798	2.6752	4.61021e-41	**
Q2N-Q2T	hsa-miR-135a-5p	3.3906	5.8033	0.775333	2.55955e-06
Q2N-Q2T	hsa-miR-136-3p	2.3734	1.4212	-0.739846	0.00409577
Q2N-Q2T	hsa-miR-139-3p	2.1474	1.0363	-1.05115	0.000241102	**
Q2N-Q2T	hsa-miR-139-5p	13.5342	3.8787	-1.80296	3.14375e-44	**
Q2N-Q2T	hsa-miR-140-3p	120.593	83.4076	-0.531899	4.35208e-53
Q2N-Q2T	hsa-miR-140-5p	1.1867	0.3553	-1.73985	6.83579e-05	**
Q2N-Q2T	hsa-miR-141-3p	1974.79	4409	1.15875	0	**
Q2N-Q2T	hsa-miR-141-5p	4.5491	20.2523	2.15443	4.6401e-83	**
Q2N-Q2T	hsa-miR-142-3p	1.7236	1.0067	-0.775791	0.0109666
Q2N-Q2T	hsa-miR-142-5p	103.16	50.4828	-1.03102	3.70429e-140	**
Q2N-Q2T	hsa-miR-143-3p	165230	51542.9	-1.68063	0	**
Q2N-Q2T	hsa-miR-143-5p	37.1839	19.897	-0.902127	9.4298e-42
Q2N-Q2T	hsa-miR-144-3p	1.0737	0.0296	-5.18085	1.79659e-10	**
Q2N-Q2T	hsa-miR-145-3p	444.313	183.84	-1.27313	0	**
Q2N-Q2T	hsa-miR-145-5p	476.355	305.917	-0.638897	7.62831e-283
Q2N-Q2T	hsa-miR-1468	18.7332	45.0052	1.26449	4.18764e-86	**
Q2N-Q2T	hsa-miR-146a-5p	953.105	194.203	-2.29507	0	**
Q2N-Q2T	hsa-miR-146b-3p	15.3991	29.9936	0.961809	7.41492e-38
Q2N-Q2T	hsa-miR-146b-5p	1875.61	1904.73	0.0222232	0.00536651
Q2N-Q2T	hsa-miR-148a-3p	7862.69	27279.8	1.79474	0	**
Q2N-Q2T	hsa-miR-148a-5p	161.196	452.687	1.4897	0	**
Q2N-Q2T	hsa-miR-148b-3p	38.2293	66.0865	0.789677	1.17576e-58
Q2N-Q2T	hsa-miR-148b-5p	3.5884	10.0077	1.4797	1.46764e-25	**
Q2N-Q2T	hsa-miR-149-5p	64.6762	89.8031	0.47353	9.47059e-33
Q2N-Q2T	hsa-miR-150-3p	4.8599	2.9016	-0.744078	3.47817e-05
Q2N-Q2T	hsa-miR-150-5p	463.725	152.425	-1.60517	0	**
Q2N-Q2T	hsa-miR-151a-3p	1943.85	3048.51	0.649189	0
Q2N-Q2T	hsa-miR-151a-5p	1033.63	3830.77	1.88991	0	**
Q2N-Q2T	hsa-miR-151b	54.7586	225.914	2.04462	0	**
Q2N-Q2T	hsa-miR-152	12.8279	5.6553	-1.18161	3.6655e-23	**
Q2N-Q2T	hsa-miR-153	2.3169	3.5234	0.604772	0.00326455
Q2N-Q2T	hsa-miR-155-5p	218.498	55.457	-1.97818	0	**
Q2N-Q2T	hsa-miR-15a-5p	21.3044	50.0386	1.23189	9.27868e-92	**
Q2N-Q2T	hsa-miR-15b-5p	35.9406	79.1736	1.1394	1.88339e-127	**
Q2N-Q2T	hsa-miR-16-2-3p	3.0233	3.7307	0.303322	0.10951
Q2N-Q2T	hsa-miR-16-5p	753.962	1518.21	1.00981	0	**
Q2N-Q2T	hsa-miR-17-3p	2.1474	6.1586	1.52001	6.45585e-17	**
Q2N-Q2T	hsa-miR-17-5p	11.076	35.6192	1.68522	2.19843e-104	**
Q2N-Q2T	hsa-miR-181a-2-3p	23.9887	14.3602	-0.740279	4.47023e-20
Q2N-Q2T	hsa-miR-181a-3p	4.6904	2.9905	-0.649324	0.000308684
Q2N-Q2T	hsa-miR-181a-5p	7851.48	6468.19	-0.279602	0
Q2N-Q2T	hsa-miR-181b-5p	370.765	402.589	0.118802	1.69751e-11
Q2N-Q2T	hsa-miR-181c-3p	10.85	3.6715	-1.56325	1.55711e-29	**
Q2N-Q2T	hsa-miR-181c-5p	245.199	131.137	-0.902879	2.6483e-265
Q2N-Q2T	hsa-miR-181d	56.8495	49.18	-0.209076	1.19568e-05
Q2N-Q2T	hsa-miR-182-5p	4981.31	14924.2	1.58306	0	**
Q2N-Q2T	hsa-miR-183-3p	1.2715	5.0927	2.0019	3.18103e-20	**
Q2N-Q2T	hsa-miR-183-5p	1303.92	3037.05	1.21981	0	**
Q2N-Q2T	hsa-miR-184	6.3009	1.6581	-1.92603	2.76104e-23	**
Q2N-Q2T	hsa-miR-185-3p	1.5823	2.1614	0.449943	0.078562
Q2N-Q2T	hsa-miR-185-5p	1.554	0.8883	-0.806868	0.0125319
Q2N-Q2T	hsa-miR-186-5p	1038.15	1053.45	0.0210977	0.0492857
Q2N-Q2T	hsa-miR-190b	2.9951	6.3659	1.08776	5.77329e-11	**
Q2N-Q2T	hsa-miR-191-3p	1.2997	5.0927	1.97025	7.80525e-20	**
Q2N-Q2T	hsa-miR-191-5p	30564.6	47457.7	0.634781	0
Q2N-Q2T	hsa-miR-192-5p	164.304	435.366	1.40586	0	**
Q2N-Q2T	hsa-miR-193a-5p	7.1768	3.2866	-1.12674	9.88178e-13	**
Q2N-Q2T	hsa-miR-193b-3p	90.4732	97.6494	0.110121	0.00209157
Q2N-Q2T	hsa-miR-193b-5p	18.931	4.7374	-1.99858	5.08053e-70	**
Q2N-Q2T	hsa-miR-194-5p	7.5159	13.9161	0.888737	2.51816e-16
Q2N-Q2T	hsa-miR-195-3p	17.7725	10.5703	-0.74963	1.42261e-15
Q2N-Q2T	hsa-miR-195-5p	64.0546	48.6174	-0.397829	1.15654e-17
Q2N-Q2T	hsa-miR-196a-5p	11.076	6.7212	-0.720646	1.15132e-09
Q2N-Q2T	hsa-miR-196b-5p	146.984	269.054	0.87224	8.293e-276
Q2N-Q2T	hsa-miR-197-3p	25.3167	47.4627	0.906705	1.66127e-53
Q2N-Q2T	hsa-miR-199a-3p	554.339	393.499	-0.494408	7.13988e-208
Q2N-Q2T	hsa-miR-199a-5p	41.0831	46.7521	0.186486	0.000373429
Q2N-Q2T	hsa-miR-199b-3p	554.283	393.085	-0.495782	6.74643e-209
Q2N-Q2T	hsa-miR-199b-5p	17.7725	24.9009	0.486551	1.25196e-10
Q2N-Q2T	hsa-miR-19a-3p	2.9103	5.8625	1.01035	3.3082e-09	**
Q2N-Q2T	hsa-miR-19b-3p	40.9983	77.1009	0.911184	1.77077e-86
Q2N-Q2T	hsa-miR-200a-3p	70.8641	11.2513	-2.65496	0	**
Q2N-Q2T	hsa-miR-200a-5p	3.0798	0.6218	-2.30831	7.37917e-15	**
Q2N-Q2T	hsa-miR-200b-3p	627.125	95.8728	-2.70956	0	**
Q2N-Q2T	hsa-miR-200b-5p	16.8684	3.4938	-2.27145	2.67611e-73	**
Q2N-Q2T	hsa-miR-200c-3p	996.872	2028.58	1.02499	0	**
Q2N-Q2T	hsa-miR-203a	47.8078	33.1617	-0.527728	9.14247e-22
Q2N-Q2T	hsa-miR-204-5p	281.818	52.2593	-2.431	0	**
Q2N-Q2T	hsa-miR-205-5p	847.685	323.86	-1.38816	0	**
Q2N-Q2T	hsa-miR-20a-5p	4.9164	23.6277	2.2648	1.00132e-102	**
Q2N-Q2T	hsa-miR-20b-5p	10.5392	19.3641	0.877619	1.11791e-21
Q2N-Q2T	hsa-miR-210	10.7652	36.8628	1.77579	4.37358e-116	**
Q2N-Q2T	hsa-miR-2110	4.6621	7.8167	0.74558	1.30469e-07
Q2N-Q2T	hsa-miR-212-3p	4.0405	4.0564	0.00566609	0.97238
Q2N-Q2T	hsa-miR-212-5p	6.6117	6.8988	0.0613242	0.645426
Q2N-Q2T	hsa-miR-21-3p	230.026	233.672	0.0226867	0.319434
Q2N-Q2T	hsa-miR-214-3p	36.5623	21.1702	-0.788322	5.40566e-33
Q2N-Q2T	hsa-miR-214-5p	4.8882	3.0201	-0.694707	9.23294e-05
Q2N-Q2T	hsa-miR-21-5p	1690.17	2329.19	0.462662	0
Q2N-Q2T	hsa-miR-218-1-3p	13.5908	12.9094	-0.0742084	0.437384
Q2N-Q2T	hsa-miR-218-5p	8.1658	5.596	-0.545198	4.60129e-05
Q2N-Q2T	hsa-miR-219-1-3p	0.9042	1.3028	0.526902	0.115397
Q2N-Q2T	hsa-miR-221-3p	535.889	142.447	-1.9115	0	**
Q2N-Q2T	hsa-miR-221-5p	37.4947	15.5149	-1.27303	2.63535e-72	**
Q2N-Q2T	hsa-miR-222-3p	865.146	514.746	-0.749082	0
Q2N-Q2T	hsa-miR-223-3p	8.3635	5.4184	-0.62624	2.99782e-06
Q2N-Q2T	hsa-miR-22-3p	9844.34	12398.7	0.332817	0
Q2N-Q2T	hsa-miR-224-5p	22.5477	11.0144	-1.03359	3.84143e-32	**
Q2N-Q2T	hsa-miR-22-5p	0.6781	1.3324	0.974457	0.00650137
Q2N-Q2T	hsa-miR-23a-3p	152.974	162.019	0.0828749	0.00272814
Q2N-Q2T	hsa-miR-23b-3p	303.15	250.548	-0.274943	1.77483e-39
Q2N-Q2T	hsa-miR-23b-5p	2.4865	1.9838	-0.32585	0.164268
Q2N-Q2T	hsa-miR-24-2-5p	1.2432	1.6285	0.389485	0.182035
Q2N-Q2T	hsa-miR-24-3p	331.208	163.351	-1.01976	0	**
Q2N-Q2T	hsa-miR-25-3p	801.487	1636.09	1.0295	0	**
Q2N-Q2T	hsa-miR-25-5p	9.3807	32.8952	1.81011	1.54215e-106	**
Q2N-Q2T	hsa-miR-26a-5p	7747.64	20738.1	1.42046	0	**
Q2N-Q2T	hsa-miR-26b-3p	3.8992	10.9256	1.48646	6.16258e-28	**
Q2N-Q2T	hsa-miR-26b-5p	923.07	1339.14	0.536796	0
Q2N-Q2T	hsa-miR-27a-3p	130.906	97.0572	-0.431628	9.27842e-40
Q2N-Q2T	hsa-miR-27a-5p	3.7014	1.7469	-1.08327	7.30976e-07	**
Q2N-Q2T	hsa-miR-27b-3p	9326.65	6128.81	-0.605751	0
Q2N-Q2T	hsa-miR-27b-5p	31.4481	24.1607	-0.380311	9.02224e-09
Q2N-Q2T	hsa-miR-28-3p	2516.44	4250.47	0.75624	0
Q2N-Q2T	hsa-miR-28-5p	41.2526	128.709	1.64155	0	**
Q2N-Q2T	hsa-miR-296-3p	1.441	2.3095	0.68051	0.00825322
Q2N-Q2T	hsa-miR-29a-3p	300.522	274.946	-0.128325	3.6637e-10
Q2N-Q2T	hsa-miR-29b-2-5p	1.1585	1.362	0.233469	0.451648
Q2N-Q2T	hsa-miR-29b-3p	3.4754	5.7737	0.732317	8.03976e-06
Q2N-Q2T	hsa-miR-29c-3p	40.3202	73.844	0.872978	3.09659e-77
Q2N-Q2T	hsa-miR-29c-5p	4.0405	5.2703	0.383351	0.0177078
Q2N-Q2T	hsa-miR-301a-3p	3.7297	3.553	-0.0700219	0.702485
Q2N-Q2T	hsa-miR-3065-3p	1.8931	1.214	-0.640982	0.0240118
Q2N-Q2T	hsa-miR-3065-5p	1.2715	0.9179	-0.470123	0.163674
Q2N-Q2T	hsa-miR-3074-5p	0.2543	1.3916	2.45214	5.95269e-08	**
Q2N-Q2T	hsa-miR-30a-3p	96.1808	59.5726	-0.6911	4.09442e-67
Q2N-Q2T	hsa-miR-30a-5p	4519.73	1826.8	-1.30692	0	**
Q2N-Q2T	hsa-miR-30b-3p	1.0172	6.8396	2.74931	2.77794e-38	**
Q2N-Q2T	hsa-miR-30b-5p	94.5985	128.294	0.439568	2.26154e-40
Q2N-Q2T	hsa-miR-30c-1-3p	25.2037	31.326	0.313725	1.64083e-06
Q2N-Q2T	hsa-miR-30c-2-3p	45.9995	25.0193	-0.878577	4.45828e-49
Q2N-Q2T	hsa-miR-30c-5p	81.149	46.6336	-0.799204	9.28583e-73
Q2N-Q2T	hsa-miR-30d-3p	6.8378	19.7194	1.52801	4.54638e-51	**
Q2N-Q2T	hsa-miR-30d-5p	2798.2	9535.26	1.76877	0	**
Q2N-Q2T	hsa-miR-30e-3p	55.7193	51.5191	-0.11307	0.0171435
Q2N-Q2T	hsa-miR-30e-5p	329.06	320.632	-0.0374327	0.0519402
Q2N-Q2T	hsa-miR-3127-5p	1.2432	1.5989	0.363021	0.21563
Q2N-Q2T	hsa-miR-3158-3p	0.7064	2.3983	1.76345	7.30734e-09	**
Q2N-Q2T	hsa-miR-31-5p	36.5057	7.0173	-2.37913	1.90683e-165	**
Q2N-Q2T	hsa-miR-3161	0.2826	2.0134	2.8328	1.35482e-12	**
Q2N-Q2T	hsa-miR-3173-5p	0.01	1.2732	6.99232	4.01273e-14	**
Q2N-Q2T	hsa-miR-320a	938.695	433.412	-1.11492	0	**
Q2N-Q2T	hsa-miR-320b	146.673	115	-0.350967	1.06135e-30
Q2N-Q2T	hsa-miR-320c	5.0859	4.1748	-0.284796	0.0790885
Q2N-Q2T	hsa-miR-320d	2.6277	2.0726	-0.342359	0.133984
Q2N-Q2T	hsa-miR-32-3p	0.1413	1.0067	2.8328	6.73259e-07	**
Q2N-Q2T	hsa-miR-324-3p	4.1535	5.4776	0.399216	0.01204
Q2N-Q2T	hsa-miR-324-5p	3.2211	1.5989	-1.01047	1.28412e-05	**
Q2N-Q2T	hsa-miR-32-5p	0.8194	1.214	0.567129	0.104536
Q2N-Q2T	hsa-miR-328	36.534	24.0422	-0.603671	3.11261e-21
Q2N-Q2T	hsa-miR-330-3p	1.8366	1.1547	-0.669519	0.0209101
Q2N-Q2T	hsa-miR-330-5p	1.6105	0.6218	-1.37299	8.96297e-05	**
Q2N-Q2T	hsa-miR-331-3p	1.5258	2.2799	0.579405	0.0229412
Q2N-Q2T	hsa-miR-331-5p	3.6167	2.872	-0.332618	0.0866838
Q2N-Q2T	hsa-miR-335-3p	3.984	7.9055	0.988639	1.47979e-11
Q2N-Q2T	hsa-miR-335-5p	5.2837	5.1519	-0.036444	0.811986
Q2N-Q2T	hsa-miR-338-3p	4.5208	3.7899	-0.254418	0.137226
Q2N-Q2T	hsa-miR-338-5p	3.6167	1.5397	-1.23202	5.79444e-08	**
Q2N-Q2T	hsa-miR-339-3p	15.7382	26.6182	0.758142	4.57492e-23
Q2N-Q2T	hsa-miR-339-5p	11.7542	7.9351	-0.566856	4.04869e-07
Q2N-Q2T	hsa-miR-33b-5p	0.1695	1.2732	2.9091	1.30664e-08	**
Q2N-Q2T	hsa-miR-340-3p	0.6216	1.7469	1.49074	1.2691e-05	**
Q2N-Q2T	hsa-miR-340-5p	29.2724	53.7989	0.878036	2.62504e-57
Q2N-Q2T	hsa-miR-342-3p	243.306	166.341	-0.548622	3.51784e-111
Q2N-Q2T	hsa-miR-342-5p	33.7932	14.2714	-1.24361	4.56265e-63	**
Q2N-Q2T	hsa-miR-345-5p	73.5201	98.4192	0.420801	4.61718e-29
Q2N-Q2T	hsa-miR-34a-5p	15.5969	10.6887	-0.545173	1.74087e-08
Q2N-Q2T	hsa-miR-34c-5p	8.5331	3.2273	-1.40274	2.69834e-20	**
Q2N-Q2T	hsa-miR-3605-3p	2.0344	12.9686	2.67235	4.97358e-69	**
Q2N-Q2T	hsa-miR-3605-5p	33.3694	14.3898	-1.21348	5.20213e-60	**
Q2N-Q2T	hsa-miR-3607-3p	1.0172	0.4145	-1.29516	0.003062	**
Q2N-Q2T	hsa-miR-3609	1.9214	0.1777	-3.43464	5.00115e-14	**
Q2N-Q2T	hsa-miR-3613-5p	0.7064	2.576	1.86658	4.50252e-10	**
Q2N-Q2T	hsa-miR-361-3p	24.9494	26.6478	0.0950113	0.164319
Q2N-Q2T	hsa-miR-3615	3.0516	17.2618	2.49995	8.5716e-85	**
Q2N-Q2T	hsa-miR-361-5p	161.761	196.957	0.284015	7.60099e-28
Q2N-Q2T	hsa-miR-3620-5p	0.9042	1.214	0.425055	0.212017
Q2N-Q2T	hsa-miR-362-5p	1.3563	1.3916	0.0370683	0.898288
Q2N-Q2T	hsa-miR-363-3p	643.739	1142.57	0.827734	0
Q2N-Q2T	hsa-miR-3648	0.01	2.9313	8.1954	1.4796e-31	**
Q2N-Q2T	hsa-miR-3652	0.01	1.8357	7.52019	4.8817e-20	**
Q2N-Q2T	hsa-miR-3653	0.8759	4.7966	2.45317	3.38233e-24	**
Q2N-Q2T	hsa-miR-365a-3p	13.0822	39.2315	1.58441	3.54367e-105	**
Q2N-Q2T	hsa-miR-365b-3p	13.0822	39.2315	1.58441	3.54367e-105	**
Q2N-Q2T	hsa-miR-365b-5p	1.328	4.1452	1.64219	4.28595e-13	**
Q2N-Q2T	hsa-miR-3679-5p	1.102	0.4441	-1.31117	0.0018403	**
Q2N-Q2T	hsa-miR-3687	1.7518	15.6334	3.15772	3.37812e-98	**
Q2N-Q2T	hsa-miR-3690	1.215	1.9838	0.70731	0.0113606
Q2N-Q2T	hsa-miR-370	3.8427	1.895	-1.01992	1.54661e-06	**
Q2N-Q2T	hsa-miR-374a-3p	4.5773	2.9313	-0.642956	0.000410778
Q2N-Q2T	hsa-miR-374a-5p	7.7702	8.5865	0.144118	0.235138
Q2N-Q2T	hsa-miR-374b-3p	0.6216	1.214	0.96571	0.00998429
Q2N-Q2T	hsa-miR-374b-5p	22.5477	21.6143	-0.0609942	0.409621
Q2N-Q2T	hsa-miR-375	17353	146131	3.07401	0	**
Q2N-Q2T	hsa-miR-378a-3p	681.742	395.187	-0.786691	0
Q2N-Q2T	hsa-miR-378c	11.4999	6.4251	-0.839831	1.44744e-12
Q2N-Q2T	hsa-miR-378d	3.6167	1.5693	-1.20455	9.84646e-08	**
Q2N-Q2T	hsa-miR-381-3p	13.5908	11.3401	-0.261197	0.00809617
Q2N-Q2T	hsa-miR-383	1.8083	0.5922	-1.61048	2.94016e-06	**
Q2N-Q2T	hsa-miR-3909	2.9103	8.2608	1.50511	7.06001e-22	**
Q2N-Q2T	hsa-miR-3943	1.4975	0.1184	-3.66082	1.00862e-11	**
Q2N-Q2T	hsa-miR-409-3p	41.2526	38.1656	-0.112212	0.0418032
Q2N-Q2T	hsa-miR-409-5p	9.8611	6.1586	-0.679146	5.00781e-08
Q2N-Q2T	hsa-miR-410	5.7641	5.4184	-0.0892285	0.545037
Q2N-Q2T	hsa-miR-411-5p	16.7271	14.8043	-0.176171	0.0443022
Q2N-Q2T	hsa-miR-421	45.2649	54.1542	0.25868	1.55118e-07
Q2N-Q2T	hsa-miR-423-3p	484.153	1328.04	1.45576	0	**
Q2N-Q2T	hsa-miR-423-5p	3897.98	8015.45	1.04006	0	**
Q2N-Q2T	hsa-miR-424-3p	3.984	7.1061	0.83484	2.88369e-08
Q2N-Q2T	hsa-miR-425-3p	3.0516	4.8262	0.661322	0.000191212
Q2N-Q2T	hsa-miR-425-5p	29.0746	104.222	1.84184	0	**
Q2N-Q2T	hsa-miR-4286	1.1585	1.4508	0.324591	0.288211
Q2N-Q2T	hsa-miR-429	43.6543	6.8988	-2.66171	2.34793e-224	**
Q2N-Q2T	hsa-miR-432-5p	19.6939	10.2446	-0.942885	1.59966e-24
Q2N-Q2T	hsa-miR-4446-3p	1.2715	0.4145	-1.61709	8.94865e-05	**
Q2N-Q2T	hsa-miR-4449	3.2211	112.365	5.12449	0	**
Q2N-Q2T	hsa-miR-4461	8.7874	1.4804	-2.56945	8.6492e-45	**
Q2N-Q2T	hsa-miR-4485	241.102	66.4418	-1.85948	0	**
Q2N-Q2T	hsa-miR-449a	2.3452	19.1568	3.03007	3.04681e-115	**
Q2N-Q2T	hsa-miR-449c-5p	1.102	12.5245	3.50656	8.51341e-87	**
Q2N-Q2T	hsa-miR-450b-5p	1.3563	2.4575	0.857515	0.000866866
Q2N-Q2T	hsa-miR-451a	15.1165	10.4222	-0.536464	4.55029e-08
Q2N-Q2T	hsa-miR-452-5p	2.5147	1.2436	-1.01586	0.000110048	**
Q2N-Q2T	hsa-miR-454-3p	5.7641	6.6916	0.215256	0.122199
Q2N-Q2T	hsa-miR-454-5p	0.0848	1.0955	3.69138	4.55298e-09	**
Q2N-Q2T	hsa-miR-455-3p	2.3169	1.1547	-1.00468	0.00023645	**
Q2N-Q2T	hsa-miR-455-5p	7.7984	2.2206	-1.81223	2.47507e-26	**
Q2N-Q2T	hsa-miR-4677-3p	0.7346	4.0564	2.46517	8.51978e-21	**
Q2N-Q2T	hsa-miR-4746-5p	0.3956	2.8424	2.845	2.60448e-17	**
Q2N-Q2T	hsa-miR-4787-3p	1.4975	0.01	-7.22641	3.86933e-16	**
Q2N-Q2T	hsa-miR-4800-5p	1.7236	0.3553	-2.27832	9.11084e-09	**
Q2N-Q2T	hsa-miR-484	39.19	130.87	1.73958	0	**
Q2N-Q2T	hsa-miR-485-5p	3.4189	2.7536	-0.312213	0.116715
Q2N-Q2T	hsa-miR-486-3p	2.7125	0.7994	-1.76263	9.38253e-10	**
Q2N-Q2T	hsa-miR-486-5p	1567.83	2539.06	0.69553	0
Q2N-Q2T	hsa-miR-487b	1.8931	1.6877	-0.165692	0.527117
Q2N-Q2T	hsa-miR-493-3p	1.1585	1.3916	0.264487	0.391504
Q2N-Q2T	hsa-miR-493-5p	4.3513	1.2436	-1.80692	2.73661e-15	**
Q2N-Q2T	hsa-miR-497-5p	40.6875	35.9449	-0.178799	0.00145239
Q2N-Q2T	hsa-miR-500a-3p	318.973	311.009	-0.036477	0.0621741
Q2N-Q2T	hsa-miR-5010-5p	0.9042	1.2732	0.493745	0.142403
Q2N-Q2T	hsa-miR-501-3p	368.335	184.255	-0.999317	0
Q2N-Q2T	hsa-miR-502-3p	18.0551	16.1663	-0.159417	0.0579052
Q2N-Q2T	hsa-miR-504	9.6915	24.9897	1.36654	1.37059e-54	**
Q2N-Q2T	hsa-miR-505-3p	4.6056	3.3458	-0.461038	0.00871448
Q2N-Q2T	hsa-miR-509-3p	4.4643	0.4737	-3.23639	2.29896e-29	**
Q2N-Q2T	hsa-miR-5096	0.5934	1.0955	0.884513	0.0230566
Q2N-Q2T	hsa-miR-532-3p	7.7702	9.2379	0.249613	0.0363026
Q2N-Q2T	hsa-miR-532-5p	125.312	125.126	-0.00213952	0.94527
Q2N-Q2T	hsa-miR-548k	3.1081	6.7212	1.11269	7.12889e-12	**
Q2N-Q2T	hsa-miR-548o-3p	1.0454	2.8128	1.42795	7.5466e-08	**
Q2N-Q2T	hsa-miR-550a-5p	1.6671	4.767	1.51574	2.25567e-13	**
Q2N-Q2T	hsa-miR-5588-5p	1.8083	1.0363	-0.803192	0.00723676
Q2N-Q2T	hsa-miR-561-5p	0.8194	1.3028	0.668976	0.0512887
Q2N-Q2T	hsa-miR-574-3p	163.739	168.444	0.0408685	0.129038
Q2N-Q2T	hsa-miR-574-5p	26.3339	18.8015	-0.486073	4.12924e-11
Q2N-Q2T	hsa-miR-576-5p	0.3391	1.0067	1.56985	0.000615103	**
Q2N-Q2T	hsa-miR-577	1.102	0.3849	-1.51757	0.000507817	**
Q2N-Q2T	hsa-miR-582-3p	7.4594	5.9217	-0.333048	0.0135747
Q2N-Q2T	hsa-miR-582-5p	1.2715	2.3095	0.861049	0.00119957
Q2N-Q2T	hsa-miR-584-5p	4.5773	7.0765	0.628539	1.56342e-05
Q2N-Q2T	hsa-miR-589-5p	19.9199	41.3337	1.05311	1.46696e-59	**
Q2N-Q2T	hsa-miR-598	4.6339	2.0134	-1.20259	1.64118e-09	**
Q2N-Q2T	hsa-miR-615-3p	0.8759	12.7909	3.86821	6.5488e-96	**
Q2N-Q2T	hsa-miR-625-5p	1.328	3.2866	1.30734	5.41485e-08	**
Q2N-Q2T	hsa-miR-628-3p	10.3414	5.3888	-0.940396	1.51723e-13
Q2N-Q2T	hsa-miR-628-5p	1.3845	0.5626	-1.29918	0.00050815	**
Q2N-Q2T	hsa-miR-629-5p	21.0219	15.13	-0.474481	8.08857e-09
Q2N-Q2T	hsa-miR-641	0.7911	1.0659	0.43014	0.237456
Q2N-Q2T	hsa-miR-6510-3p	5.2555	0.5922	-3.14967	1.70775e-33	**
Q2N-Q2T	hsa-miR-6511a-3p	1.441	1.362	-0.0813436	0.785122
Q2N-Q2T	hsa-miR-6511b-3p	2.0909	1.6285	-0.36058	0.161026
Q2N-Q2T	hsa-miR-6515-5p	0.9607	2.6648	1.47187	8.63089e-08	**
Q2N-Q2T	hsa-miR-652-3p	13.9016	9.5044	-0.548583	8.7735e-08
Q2N-Q2T	hsa-miR-654-3p	11.1043	11.044	-0.00785566	0.940925
Q2N-Q2T	hsa-miR-654-5p	1.6105	1.6877	0.0675498	0.801496
Q2N-Q2T	hsa-miR-660-5p	8.4766	14.2714	0.751569	6.69984e-13
Q2N-Q2T	hsa-miR-664a-3p	15.8229	9.001	-0.813857	6.14756e-16
Q2N-Q2T	hsa-miR-664a-5p	11.2456	24.6048	1.12958	2.59856e-40	**
Q2N-Q2T	hsa-miR-664b-3p	1.4975	0.3849	-1.96	1.16023e-06	**
Q2N-Q2T	hsa-miR-664b-5p	1.5823	1.2732	-0.313564	0.286148
Q2N-Q2T	hsa-miR-671-3p	40.3767	326.761	3.01664	0	**
Q2N-Q2T	hsa-miR-6724-5p	1.4693	6.0402	2.03947	2.96708e-24	**
Q2N-Q2T	hsa-miR-708-5p	1.0737	1.4508	0.434258	0.163666
Q2N-Q2T	hsa-miR-744-3p	0.5086	1.6285	1.67894	4.38278e-06	**
Q2N-Q2T	hsa-miR-744-5p	315.385	769.618	1.28703	0	**
Q2N-Q2T	hsa-miR-766-3p	0.9042	1.8653	1.04469	0.000631881	**
Q2N-Q2T	hsa-miR-769-5p	81.8836	214.041	1.38624	0	**
Q2N-Q2T	hsa-miR-873-3p	1.554	0.3553	-2.12888	1.72685e-07	**
Q2N-Q2T	hsa-miR-874	62.3875	80.6836	0.371018	2.07997e-19
Q2N-Q2T	hsa-miR-877-5p	7.4029	5.6553	-0.388487	0.00449889
Q2N-Q2T	hsa-miR-887	12.0367	7.3726	-0.707195	4.31666e-10
Q2N-Q2T	hsa-miR-889	1.7236	0.5922	-1.54127	9.90625e-06	**
Q2N-Q2T	hsa-miR-891a	4.4361	1.0659	-2.05722	3.30397e-18	**
Q2N-Q2T	hsa-miR-92a-1-5p	2.0061	11.8139	2.55802	4.33622e-60	**
Q2N-Q2T	hsa-miR-92a-2-5p	1.1585	2.5463	1.13614	1.867e-05	**
Q2N-Q2T	hsa-miR-92a-3p	4254.5	17104.6	2.00732	0	**
Q2N-Q2T	hsa-miR-92b-3p	649.87	1535.09	1.2401	0	**
Q2N-Q2T	hsa-miR-93-3p	1.3845	4.7966	1.79265	1.07735e-16	**
Q2N-Q2T	hsa-miR-93-5p	179.449	409.636	1.19077	0	**
Q2N-Q2T	hsa-miR-937-3p	0.5086	2.2503	2.14551	1.75431e-10	**
Q2N-Q2T	hsa-miR-940	1.0737	1.8653	0.796817	0.00649451
Q2N-Q2T	hsa-miR-941	666.795	1085.16	0.702589	0
Q2N-Q2T	hsa-miR-95	1.2432	0.9179	-0.43765	0.197344
Q2N-Q2T	hsa-miR-9-5p	2.9385	3.6715	0.32129	0.0936949
Q2N-Q2T	hsa-miR-96-5p	29.7245	54.9241	0.885787	2.55338e-59
Q2N-Q2T	hsa-miR-98-5p	70.9771	98.4488	0.47202	1.53345e-35
Q2N-Q2T	hsa-miR-99a-3p	15.6534	43.5247	1.47536	4.98112e-105	**
Q2N-Q2T	hsa-miR-99a-5p	4876.94	4647.58	-0.0694944	2.05036e-43
Q2N-Q2T	hsa-miR-99b-3p	3.2211	2.4871	-0.373089	0.0718433
Q2N-Q2T	hsa-miR-99b-5p	22440.9	5475.86	-2.03497	0	**

## Sheet: Q3N-Q3T
pairwise	miR-name	Q3N-std	Q3T-std	fold-change(log2 Q3T/Q3N)	p-value	sig-lable
Q3N-Q3T	hsa-let-7a-3p	4.2814	7.3694	0.783465	5.18382e-08
Q3N-Q3T	hsa-let-7a-5p	6229.76	11097.6	0.833001	0
Q3N-Q3T	hsa-let-7b-3p	1.679	1.9116	0.187178	0.464165
Q3N-Q3T	hsa-let-7b-5p	1119.66	1583.28	0.499855	0
Q3N-Q3T	hsa-let-7c	3456.32	4509.18	0.383631	0
Q3N-Q3T	hsa-let-7d-3p	17.4615	18.6174	0.0924741	0.249063
Q3N-Q3T	hsa-let-7d-5p	143.526	135.946	-0.0782775	0.00657998
Q3N-Q3T	hsa-let-7e-3p	1.3712	1.219	-0.169741	0.572747
Q3N-Q3T	hsa-let-7e-5p	256.158	223.769	-0.195024	7.72902e-19
Q3N-Q3T	hsa-let-7f-5p	4657.83	5961.2	0.355945	0
Q3N-Q3T	hsa-let-7g-5p	1383.32	1605.97	0.215312	1.19637e-131
Q3N-Q3T	hsa-let-7i-3p	1.3992	1.5792	0.174592	0.534487
Q3N-Q3T	hsa-let-7i-5p	1480.17	1373.64	-0.107756	6.3279e-33
Q3N-Q3T	hsa-miR-1	5.5966	5.7902	0.0490625	0.731593
Q3N-Q3T	hsa-miR-100-3p	1.1473	1.1082	-0.0500244	0.876208
Q3N-Q3T	hsa-miR-100-5p	11434.2	8347.92	-0.453873	0
Q3N-Q3T	hsa-miR-101-3p	296.986	410.525	0.467077	6.67404e-145
Q3N-Q3T	hsa-miR-101-5p	1.2592	1.7454	0.47105	0.0940421
Q3N-Q3T	hsa-miR-103a-3p	513.883	703.278	0.452655	4.83886e-233
Q3N-Q3T	hsa-miR-106a-5p	1.4551	6.3166	2.11803	2.7868e-27	**
Q3N-Q3T	hsa-miR-106b-3p	30.4177	35.4063	0.219095	0.000228386
Q3N-Q3T	hsa-miR-106b-5p	4.2814	11.442	1.41818	3.50329e-28	**
Q3N-Q3T	hsa-miR-107	195.519	202.243	0.0487825	0.043342
Q3N-Q3T	hsa-miR-10a-3p	1.0913	0.4433	-1.29969	0.001623	**
Q3N-Q3T	hsa-miR-10a-5p	14917.3	6379.24	-1.22553	0	**
Q3N-Q3T	hsa-miR-10b-3p	3.0222	2.9644	-0.027859	0.887351
Q3N-Q3T	hsa-miR-10b-5p	112103	110395	-0.0221427	2.38407e-104
Q3N-Q3T	hsa-miR-1180	6.4361	4.5435	-0.502383	0.000609786
Q3N-Q3T	hsa-miR-1247-3p	2.0987	0.9697	-1.11389	0.000100637	**
Q3N-Q3T	hsa-miR-1247-5p	4.7851	5.0699	0.0834082	0.587509
Q3N-Q3T	hsa-miR-1248	0.6156	6.9538	3.49774	3.63591e-50	**
Q3N-Q3T	hsa-miR-125a-3p	1.7909	1.1636	-0.62209	0.0289295
Q3N-Q3T	hsa-miR-125a-5p	2957.07	2316.1	-0.352473	0
Q3N-Q3T	hsa-miR-125b-1-3p	56.2182	38.0937	-0.561485	3.27336e-29
Q3N-Q3T	hsa-miR-125b-2-3p	327.795	269.066	-0.284835	3.9409e-47
Q3N-Q3T	hsa-miR-125b-5p	1208.79	1093.58	-0.144506	5.73524e-47
Q3N-Q3T	hsa-miR-126-3p	104.965	100.124	-0.0681205	0.0427809
Q3N-Q3T	hsa-miR-126-5p	1478.35	1298.07	-0.187626	1.64733e-93
Q3N-Q3T	hsa-miR-1271-5p	22.0787	20.5567	-0.103047	0.162493
Q3N-Q3T	hsa-miR-127-3p	1021.39	810.384	-0.333852	2.64695e-192
Q3N-Q3T	hsa-miR-127-5p	0.8955	1.0805	0.270934	0.434183
Q3N-Q3T	hsa-miR-128	18.4689	23.7982	0.365755	8.8137e-07
Q3N-Q3T	hsa-miR-1287	1.3712	1.9393	0.500097	0.0620661
Q3N-Q3T	hsa-miR-1291	0.3918	2.0778	2.40687	2.42709e-11	**
Q3N-Q3T	hsa-miR-1296	9.1225	19.1438	1.06938	3.74769e-30	**
Q3N-Q3T	hsa-miR-1298	2.2387	0.1662	-3.75167	4.82401e-18	**
Q3N-Q3T	hsa-miR-1299	3.8337	3.9063	0.0270653	0.876242
Q3N-Q3T	hsa-miR-1301	1.2872	0.9142	-0.493655	0.133632
Q3N-Q3T	hsa-miR-1307-3p	7.8353	11.7744	0.587593	9.12049e-08
Q3N-Q3T	hsa-miR-1307-5p	3.4419	9.281	1.43108	1.87908e-23	**
Q3N-Q3T	hsa-miR-130a-3p	254.647	174.178	-0.547936	1.10111e-120
Q3N-Q3T	hsa-miR-130b-3p	5.2049	10.2784	0.981673	6.8046e-15
Q3N-Q3T	hsa-miR-130b-5p	1.5111	2.7427	0.859998	0.000331875
Q3N-Q3T	hsa-miR-132-3p	5.065	4.876	-0.0548641	0.719623
Q3N-Q3T	hsa-miR-132-5p	1.2872	1.4406	0.162434	0.580411
Q3N-Q3T	hsa-miR-133a	216.338	159.162	-0.442789	3.0213e-70
Q3N-Q3T	hsa-miR-133b	5.2888	4.4604	-0.245767	0.112116
Q3N-Q3T	hsa-miR-134	3.274	3.2137	-0.0268191	0.887088
Q3N-Q3T	hsa-miR-135a-5p	14.8871	16.4288	0.142164	0.0988948
Q3N-Q3T	hsa-miR-136-3p	7.6674	8.062	0.0724003	0.551576
Q3N-Q3T	hsa-miR-136-5p	2.1267	3.0198	0.505836	0.0184316
Q3N-Q3T	hsa-miR-138-5p	2.5465	0.2493	-3.35256	1.19953e-18	**
Q3N-Q3T	hsa-miR-139-5p	2.7703	2.6319	-0.0739375	0.721609
Q3N-Q3T	hsa-miR-140-3p	122.622	82.0053	-0.580433	2.30183e-65
Q3N-Q3T	hsa-miR-140-5p	2.8263	2.9921	0.0822438	0.681592
Q3N-Q3T	hsa-miR-141-3p	1439.04	3726.28	1.37263	0	**
Q3N-Q3T	hsa-miR-141-5p	6.3242	23.2718	1.87963	2.06467e-82	**
Q3N-Q3T	hsa-miR-142-3p	3.6938	4.128	0.160337	0.353279
Q3N-Q3T	hsa-miR-142-5p	98.9486	125.889	0.347403	4.35636e-27
Q3N-Q3T	hsa-miR-143-3p	405397	251400	-0.689349	0
Q3N-Q3T	hsa-miR-143-5p	15.8945	11.9683	-0.409309	8.08214e-06
Q3N-Q3T	hsa-miR-144-3p	5.0929	1.8562	-1.45614	7.01427e-14	**
Q3N-Q3T	hsa-miR-144-5p	8.339	2.3826	-1.80734	3.8135e-29	**
Q3N-Q3T	hsa-miR-145-3p	548.387	353.204	-0.63469	0
Q3N-Q3T	hsa-miR-145-5p	2102.32	1089.23	-0.948675	0
Q3N-Q3T	hsa-miR-1468	8.4229	10.0013	0.247799	0.0276171
Q3N-Q3T	hsa-miR-146a-5p	314.475	353.759	0.169819	8.31226e-20
Q3N-Q3T	hsa-miR-146b-3p	4.6172	7.4248	0.685334	1.15583e-06
Q3N-Q3T	hsa-miR-146b-5p	897.645	1243.38	0.470047	0
Q3N-Q3T	hsa-miR-147b	0.1399	1.3021	3.21837	8.78052e-10	**
Q3N-Q3T	hsa-miR-148a-3p	3478.82	10661.9	1.61579	0	**
Q3N-Q3T	hsa-miR-148a-5p	58.0371	179.026	1.62513	0	**
Q3N-Q3T	hsa-miR-148b-3p	32.9082	52.6939	0.679189	6.74101e-38
Q3N-Q3T	hsa-miR-148b-5p	3.6658	7.5356	1.03959	2.77932e-12	**
Q3N-Q3T	hsa-miR-149-5p	20.3438	20.3905	0.00330797	0.965162
Q3N-Q3T	hsa-miR-150-5p	22.7224	38.5369	0.762125	4.39273e-34
Q3N-Q3T	hsa-miR-151a-3p	805.188	968.66	0.266663	7.95253e-120
Q3N-Q3T	hsa-miR-151a-5p	658.305	845.929	0.361781	3.12342e-185
Q3N-Q3T	hsa-miR-151b	49.4743	63.9143	0.369459	4.09715e-16
Q3N-Q3T	hsa-miR-152	17.0977	13.3536	-0.356574	4.70567e-05
Q3N-Q3T	hsa-miR-153	0.8675	4.2388	2.28872	1.52758e-20	**
Q3N-Q3T	hsa-miR-155-5p	54.8191	55.686	0.022636	0.621267
Q3N-Q3T	hsa-miR-15a-5p	48.0751	49.0646	0.0293926	0.547534
Q3N-Q3T	hsa-miR-15b-5p	10.4937	17.0106	0.696911	7.6483e-14
Q3N-Q3T	hsa-miR-16-2-3p	5.0929	3.7678	-0.434765	0.00761607
Q3N-Q3T	hsa-miR-16-5p	859.812	842.494	-0.0293552	0.0118857
Q3N-Q3T	hsa-miR-17-3p	1.9868	3.6847	0.891101	1.77534e-05
Q3N-Q3T	hsa-miR-17-5p	6.2403	17.8694	1.5178	1.6701e-47	**
Q3N-Q3T	hsa-miR-181a-2-3p	14.2434	18.2018	0.353788	3.08451e-05
Q3N-Q3T	hsa-miR-181a-3p	6.632	5.9288	-0.161704	0.234713
Q3N-Q3T	hsa-miR-181a-5p	2463.19	3470.98	0.494815	0
Q3N-Q3T	hsa-miR-181b-5p	121.643	151.322	0.314967	4.54863e-27
Q3N-Q3T	hsa-miR-181c-3p	12.6484	9.752	-0.375185	0.000241985
Q3N-Q3T	hsa-miR-181c-5p	253.332	214.544	-0.239758	5.72425e-27
Q3N-Q3T	hsa-miR-181d	42.7024	26.7071	-0.677094	6.77834e-31
Q3N-Q3T	hsa-miR-182-5p	1395.07	4276.19	1.61598	0	**
Q3N-Q3T	hsa-miR-183-5p	391.849	1328.79	1.76174	0	**
Q3N-Q3T	hsa-miR-184	5.5127	3.7124	-0.570407	0.000373405
Q3N-Q3T	hsa-miR-185-5p	3.5818	2.1332	-0.747666	0.000270543
Q3N-Q3T	hsa-miR-186-5p	886.731	848.284	-0.0639505	3.16669e-08
Q3N-Q3T	hsa-miR-187-3p	1.3432	4.4604	1.7315	2.10651e-15	**
Q3N-Q3T	hsa-miR-190a	0.6996	2.5488	1.86522	2.99582e-10	**
Q3N-Q3T	hsa-miR-190b	1.735	6.9538	2.00287	6.57701e-28	**
Q3N-Q3T	hsa-miR-191-5p	5728.89	9938.4	0.794759	0
Q3N-Q3T	hsa-miR-192-5p	273.452	385.12	0.494022	1.41837e-150
Q3N-Q3T	hsa-miR-193a-5p	1.9029	2.2718	0.255636	0.281065
Q3N-Q3T	hsa-miR-193b-3p	13.0402	13.7137	0.0726519	0.435551
Q3N-Q3T	hsa-miR-194-5p	8.9826	12.7995	0.510882	9.14872e-07
Q3N-Q3T	hsa-miR-195-3p	6.0444	3.4908	-0.792041	6.38608e-07
Q3N-Q3T	hsa-miR-195-5p	131.297	89.5132	-0.552664	4.2173e-64
Q3N-Q3T	hsa-miR-196a-5p	18.301	2.7982	-2.70935	2.01014e-101	**
Q3N-Q3T	hsa-miR-196b-5p	107.763	139.132	0.368587	4.63305e-33
Q3N-Q3T	hsa-miR-197-3p	5.7925	6.7322	0.216892	0.111953
Q3N-Q3T	hsa-miR-199a-3p	702.938	575.145	-0.289471	5.47496e-102
Q3N-Q3T	hsa-miR-199a-5p	152.872	101.842	-0.585998	2.11623e-82
Q3N-Q3T	hsa-miR-199b-3p	702.882	575.034	-0.289634	4.35724e-102
Q3N-Q3T	hsa-miR-199b-5p	65.3408	81.7559	0.323339	4.74695e-16
Q3N-Q3T	hsa-miR-19a-3p	5.9324	13.6306	1.20016	4.5577e-26	**
Q3N-Q3T	hsa-miR-19b-3p	64.5013	166.836	1.37103	0	**
Q3N-Q3T	hsa-miR-200a-3p	77.3456	62.3905	-0.309993	3.22643e-14
Q3N-Q3T	hsa-miR-200a-5p	4.5613	3.9617	-0.203325	0.218964
Q3N-Q3T	hsa-miR-200b-3p	162.498	122.038	-0.413092	5.183e-47
Q3N-Q3T	hsa-miR-200b-5p	3.7777	3.657	-0.0468475	0.790849
Q3N-Q3T	hsa-miR-200c-3p	92.2886	287.49	1.63928	0	**
Q3N-Q3T	hsa-miR-203a	32.9922	48.5383	0.556999	4.37101e-25
Q3N-Q3T	hsa-miR-204-5p	691.577	164.537	-2.07148	0	**
Q3N-Q3T	hsa-miR-205-5p	1292.26	1169.99	-0.143407	2.24801e-49
Q3N-Q3T	hsa-miR-20a-5p	7.0238	22.7177	1.69349	6.66081e-70	**
Q3N-Q3T	hsa-miR-20b-5p	6.1003	19.3377	1.66446	2.34743e-58	**
Q3N-Q3T	hsa-miR-210	8.283	13.215	0.673951	1.58647e-10
Q3N-Q3T	hsa-miR-212-3p	1.7909	1.4683	-0.286538	0.285932
Q3N-Q3T	hsa-miR-212-5p	5.3728	5.2084	-0.0448339	0.762166
Q3N-Q3T	hsa-miR-21-3p	90.3857	108.934	0.269288	3.33166e-15
Q3N-Q3T	hsa-miR-214-3p	13.292	9.3918	-0.501085	8.78143e-07
Q3N-Q3T	hsa-miR-214-5p	7.2476	4.2111	-0.783306	6.59479e-08
Q3N-Q3T	hsa-miR-215	2.8823	1.3575	-1.08627	7.74919e-06	**
Q3N-Q3T	hsa-miR-21-5p	4719.09	5522.92	0.226923	0
Q3N-Q3T	hsa-miR-218-1-3p	4.1135	3.6293	-0.180675	0.297633
Q3N-Q3T	hsa-miR-218-5p	23.9536	30.3918	0.34344	1.62563e-07
Q3N-Q3T	hsa-miR-221-3p	759.128	594.095	-0.35365	1.22449e-159
Q3N-Q3T	hsa-miR-221-5p	22.4705	21.8311	-0.0416474	0.564853
Q3N-Q3T	hsa-miR-222-3p	275.579	190.773	-0.530606	3.60664e-123
Q3N-Q3T	hsa-miR-223-3p	11.5011	12.3839	0.106694	0.279404
Q3N-Q3T	hsa-miR-22-3p	3992.75	3852.75	-0.0514949	2.72518e-21
Q3N-Q3T	hsa-miR-224-3p	1.2313	0.471	-1.38638	0.000429535	**
Q3N-Q3T	hsa-miR-224-5p	23.7857	9.281	-1.35774	2.39651e-53	**
Q3N-Q3T	hsa-miR-22-5p	1.8749	2.0501	0.128881	0.59787
Q3N-Q3T	hsa-miR-23a-3p	111.485	86.438	-0.367113	1.20757e-26
Q3N-Q3T	hsa-miR-23b-3p	238.753	173.264	-0.462545	1.18413e-83
Q3N-Q3T	hsa-miR-24-1-5p	1.0074	0.7203	-0.483967	0.193382
Q3N-Q3T	hsa-miR-24-2-5p	1.735	2.0501	0.240759	0.33374
Q3N-Q3T	hsa-miR-24-3p	357.737	267.57	-0.418984	6.21735e-104
Q3N-Q3T	hsa-miR-25-3p	686.288	1085.68	0.661718	0
Q3N-Q3T	hsa-miR-26a-5p	12256.5	11687.1	-0.0686254	9.04118e-108
Q3N-Q3T	hsa-miR-26b-3p	10.1019	8.7269	-0.211085	0.0576156
Q3N-Q3T	hsa-miR-26b-5p	904.809	1180.13	0.383259	1.11269e-286
Q3N-Q3T	hsa-miR-27a-3p	211.217	190.718	-0.147289	8.83572e-10
Q3N-Q3T	hsa-miR-27a-5p	2.7144	2.7982	0.0438658	0.831519
Q3N-Q3T	hsa-miR-27b-3p	10155	7409.4	-0.45476	0
Q3N-Q3T	hsa-miR-27b-5p	27.7593	18.1741	-0.611087	1.8086e-17
Q3N-Q3T	hsa-miR-28-3p	861.547	660.503	-0.383364	4.60906e-210
Q3N-Q3T	hsa-miR-28-5p	98.5568	114.807	0.220188	2.56814e-11
Q3N-Q3T	hsa-miR-29a-3p	253.052	319.35	0.335703	4.73359e-62
Q3N-Q3T	hsa-miR-29b-3p	8.339	9.0594	0.119541	0.301193
Q3N-Q3T	hsa-miR-29c-3p	75.2748	131.901	0.809218	2.23357e-124
Q3N-Q3T	hsa-miR-29c-5p	5.8485	4.9314	-0.246069	0.09435
Q3N-Q3T	hsa-miR-301a-3p	7.2756	7.6464	0.0717144	0.565717
Q3N-Q3T	hsa-miR-301b	0.3078	1.0528	1.77417	0.000104079	**
Q3N-Q3T	hsa-miR-30a-3p	73.9316	113.644	0.620256	4.23717e-68
Q3N-Q3T	hsa-miR-30a-5p	2968.54	4203.13	0.50171	0
Q3N-Q3T	hsa-miR-30b-5p	49.3624	103.532	1.06859	4.28753e-155	**
Q3N-Q3T	hsa-miR-30c-1-3p	3.2181	4.4327	0.461977	0.00851638
Q3N-Q3T	hsa-miR-30c-2-3p	6.0724	9.3641	0.624874	4.8089e-07
Q3N-Q3T	hsa-miR-30c-5p	79.3603	83.0026	0.0647391	0.0867453
Q3N-Q3T	hsa-miR-30d-3p	7.5555	19.6425	1.37838	2.79851e-45	**
Q3N-Q3T	hsa-miR-30d-5p	1116.11	2243.59	1.00733	0	**
Q3N-Q3T	hsa-miR-30e-3p	49.1945	51.6689	0.0707991	0.139885
Q3N-Q3T	hsa-miR-30e-5p	320.436	388.583	0.278189	3.66383e-53
Q3N-Q3T	hsa-miR-3158-3p	0.8115	1.4683	0.855484	0.00918424
Q3N-Q3T	hsa-miR-31-5p	19.8961	15.7916	-0.333328	3.77582e-05
Q3N-Q3T	hsa-miR-320a	204.109	130.377	-0.64665	4.79173e-130
Q3N-Q3T	hsa-miR-320b	23.8137	12.5501	-0.924093	1.56611e-29
Q3N-Q3T	hsa-miR-324-3p	0.9794	1.4406	0.5567	0.0768562
Q3N-Q3T	hsa-miR-324-5p	2.3226	2.8536	0.297042	0.163069
Q3N-Q3T	hsa-miR-32-5p	1.735	3.934	1.18106	2.27864e-08	**
Q3N-Q3T	hsa-miR-328	20.2039	11.5805	-0.802936	2.92084e-20
Q3N-Q3T	hsa-miR-330-3p	0.7555	1.1082	0.552715	0.124033
Q3N-Q3T	hsa-miR-330-5p	2.0428	1.6346	-0.32161	0.203343
Q3N-Q3T	hsa-miR-331-5p	1.8749	1.496	-0.325703	0.217721
Q3N-Q3T	hsa-miR-335-3p	5.7925	7.2586	0.325505	0.0150578
Q3N-Q3T	hsa-miR-335-5p	3.1341	3.0475	-0.040425	0.83468
Q3N-Q3T	hsa-miR-338-3p	46.0883	10.029	-2.20022	3.3231e-198	**
Q3N-Q3T	hsa-miR-338-5p	5.9604	1.1359	-2.39157	8.27747e-30	**
Q3N-Q3T	hsa-miR-339-3p	4.1135	4.2111	0.0338307	0.840038
Q3N-Q3T	hsa-miR-339-5p	2.5465	3.934	0.627481	0.00107599
Q3N-Q3T	hsa-miR-33a-5p	0.2518	1.0805	2.10135	1.08398e-05	**
Q3N-Q3T	hsa-miR-33b-5p	0.6716	1.6623	1.30751	8.94243e-05	**
Q3N-Q3T	hsa-miR-340-3p	0.7555	1.1913	0.657033	0.062519
Q3N-Q3T	hsa-miR-340-5p	32.4325	46.7375	0.52714	4.55961e-22
Q3N-Q3T	hsa-miR-342-3p	146.66	141.625	-0.0503955	0.0755617
Q3N-Q3T	hsa-miR-342-5p	2.9103	3.2968	0.179898	0.353787
Q3N-Q3T	hsa-miR-345-5p	35.2588	41.6121	0.23902	1.40053e-05
Q3N-Q3T	hsa-miR-34a-5p	29.5782	23.1887	-0.351112	1.31355e-07
Q3N-Q3T	hsa-miR-34c-5p	5.8765	6.7045	0.190173	0.162322
Q3N-Q3T	hsa-miR-3605-3p	1.3152	1.3852	0.0748121	0.80016
Q3N-Q3T	hsa-miR-3605-5p	2.1267	2.1332	0.0044027	0.985376
Q3N-Q3T	hsa-miR-3607-3p	2.7983	7.0646	1.33606	1.46141e-16	**
Q3N-Q3T	hsa-miR-3609	0.2798	1.9393	2.79307	2.4431e-12	**
Q3N-Q3T	hsa-miR-3613-5p	1.1193	1.967	0.8134	0.00381004
Q3N-Q3T	hsa-miR-361-3p	13.6558	16.0686	0.23473	0.00800663
Q3N-Q3T	hsa-miR-3615	1.3152	1.3575	0.04567	0.878018
Q3N-Q3T	hsa-miR-361-5p	45.9484	46.3496	0.0125423	0.802506
Q3N-Q3T	hsa-miR-362-5p	1.3992	2.1332	0.608417	0.0194198
Q3N-Q3T	hsa-miR-363-3p	293.404	608.501	1.05237	0	**
Q3N-Q3T	hsa-miR-3651	0.6436	3.5185	2.45072	1.24544e-18	**
Q3N-Q3T	hsa-miR-3653	0.6716	2.7704	2.04442	2.90076e-12	**
Q3N-Q3T	hsa-miR-365a-3p	7.8073	8.6715	0.151458	0.202484
Q3N-Q3T	hsa-miR-365b-3p	7.8073	8.6715	0.151458	0.202484
Q3N-Q3T	hsa-miR-3687	0.5597	5.9842	3.41843	1.50152e-42	**
Q3N-Q3T	hsa-miR-369-5p	1.0354	1.4683	0.503959	0.102615
Q3N-Q3T	hsa-miR-370	1.0913	1.4683	0.428099	0.160061
Q3N-Q3T	hsa-miR-374a-3p	8.6468	9.8905	0.193877	0.0836496
Q3N-Q3T	hsa-miR-374a-5p	13.7957	14.8773	0.108894	0.226391
Q3N-Q3T	hsa-miR-374b-3p	2.2387	2.7982	0.321838	0.136197
Q3N-Q3T	hsa-miR-374b-5p	21.5191	22.5792	0.0693766	0.338982
Q3N-Q3T	hsa-miR-375	2462.19	12958.6	2.3959	0	**
Q3N-Q3T	hsa-miR-378a-3p	332.552	230.446	-0.529153	1.70312e-147
Q3N-Q3T	hsa-miR-378a-5p	2.6024	1.3852	-0.909748	0.00024405
Q3N-Q3T	hsa-miR-378c	13.1241	11.1926	-0.229673	0.0189048
Q3N-Q3T	hsa-miR-378d	2.8823	2.0224	-0.511152	0.0200271
Q3N-Q3T	hsa-miR-379-5p	1.9308	1.7731	-0.122925	0.62431
Q3N-Q3T	hsa-miR-381-3p	16.5101	23.161	0.488349	2.30603e-10
Q3N-Q3T	hsa-miR-382-5p	1.5391	0.9697	-0.666477	0.0314864
Q3N-Q3T	hsa-miR-3909	1.0354	1.2744	0.29963	0.349289
Q3N-Q3T	hsa-miR-3912	1.0354	1.1359	0.133648	0.685453
Q3N-Q3T	hsa-miR-409-3p	27.1717	27.1504	-0.00113138	0.986075
Q3N-Q3T	hsa-miR-409-5p	5.6246	5.347	-0.0730208	0.61568
Q3N-Q3T	hsa-miR-410	6.4361	6.9815	0.11735	0.372926
Q3N-Q3T	hsa-miR-411-5p	21.2392	23.7427	0.160755	0.0253198
Q3N-Q3T	hsa-miR-421	31.9568	24.4631	-0.385516	2.14027e-09
Q3N-Q3T	hsa-miR-423-3p	87.9232	100.623	0.19464	2.95933e-08
Q3N-Q3T	hsa-miR-423-5p	93.4919	67.3773	-0.472579	3.94723e-35
Q3N-Q3T	hsa-miR-424-3p	1.679	1.7731	0.0786717	0.763035
Q3N-Q3T	hsa-miR-424-5p	3.8337	5.8179	0.601761	0.000126197
Q3N-Q3T	hsa-miR-425-3p	4.7292	5.2084	0.139244	0.363116
Q3N-Q3T	hsa-miR-425-5p	11.8649	25.5989	1.10938	4.29222e-42	**
Q3N-Q3T	hsa-miR-4286	0.2239	1.5237	2.76665	7.07859e-10	**
Q3N-Q3T	hsa-miR-429	58.5968	40.2823	-0.540676	1.76136e-28
Q3N-Q3T	hsa-miR-432-5p	9.5703	8.3113	-0.20349	0.0744868
Q3N-Q3T	hsa-miR-4449	1.735	11.4974	2.7283	1.19036e-64	**
Q3N-Q3T	hsa-miR-4454	4.5613	8.3391	0.870447	2.30082e-10
Q3N-Q3T	hsa-miR-4485	5.6246	21.9697	1.96569	1.31723e-82	**
Q3N-Q3T	hsa-miR-449a	1.1193	19.9749	4.15752	2.1551e-161	**
Q3N-Q3T	hsa-miR-449c-5p	0.5037	4.7375	3.23349	2.17338e-32	**
Q3N-Q3T	hsa-miR-450a-5p	1.0913	2.2441	1.04009	0.000144142	**
Q3N-Q3T	hsa-miR-450b-5p	2.7424	4.2665	0.637614	0.000550715
Q3N-Q3T	hsa-miR-451a	208.531	83.5013	-1.32039	0	**
Q3N-Q3T	hsa-miR-452-5p	4.0016	1.967	-1.02458	4.93012e-07	**
Q3N-Q3T	hsa-miR-454-3p	9.8221	13.5752	0.46687	3.22668e-06
Q3N-Q3T	hsa-miR-455-3p	1.7909	1.967	0.135312	0.588131
Q3N-Q3T	hsa-miR-455-5p	12.4525	10.223	-0.284617	0.00500593
Q3N-Q3T	hsa-miR-4677-3p	0.6716	1.1082	0.722544	0.0509543
Q3N-Q3T	hsa-miR-4770	1.0074	1.6069	0.673644	0.0266424
Q3N-Q3T	hsa-miR-484	14.2155	18.9222	0.412615	9.34041e-07
Q3N-Q3T	hsa-miR-486-3p	1.2313	1.2467	0.017932	0.953988
Q3N-Q3T	hsa-miR-486-5p	3019.81	1378.99	-1.13084	0	**
Q3N-Q3T	hsa-miR-487b	1.4831	1.7454	0.234942	0.384202
Q3N-Q3T	hsa-miR-490-3p	0.1959	1.3021	2.73265	1.60829e-08	**
Q3N-Q3T	hsa-miR-493-3p	0.7276	1.5792	1.11798	0.00074142	**
Q3N-Q3T	hsa-miR-493-5p	9.99	13.0211	0.382295	0.000151295
Q3N-Q3T	hsa-miR-497-5p	56.4141	48.4551	-0.219407	3.16843e-06
Q3N-Q3T	hsa-miR-500a-3p	53.8397	88.0172	0.709115	7.09892e-67
Q3N-Q3T	hsa-miR-501-3p	67.5235	91.0647	0.431502	3.2179e-29
Q3N-Q3T	hsa-miR-502-3p	5.7086	6.6491	0.220022	0.109244
Q3N-Q3T	hsa-miR-504	2.4066	3.2414	0.429621	0.0355253
Q3N-Q3T	hsa-miR-505-3p	2.0708	2.2718	0.133648	0.564974
Q3N-Q3T	hsa-miR-509-3p	8.0592	3.8509	-1.06544	1.59024e-13	**
Q3N-Q3T	hsa-miR-532-3p	0.7555	1.219	0.690194	0.0490499
Q3N-Q3T	hsa-miR-532-5p	96.0383	128.133	0.415964	6.99706e-38
Q3N-Q3T	hsa-miR-542-3p	1.0634	2.4103	1.18053	1.27158e-05	**
Q3N-Q3T	hsa-miR-548k	2.4625	4.1834	0.764552	6.02108e-05
Q3N-Q3T	hsa-miR-548o-3p	0.7555	1.3298	0.815706	0.0173881
Q3N-Q3T	hsa-miR-561-5p	1.0074	1.7454	0.792921	0.00770652
Q3N-Q3T	hsa-miR-574-3p	47.9912	47.4578	-0.0161247	0.74348
Q3N-Q3T	hsa-miR-574-5p	7.8633	8.2559	0.0702906	0.558373
Q3N-Q3T	hsa-miR-577	3.4699	0.9142	-1.92431	5.25238e-14	**
Q3N-Q3T	hsa-miR-582-3p	13.348	12.5224	-0.0921125	0.330842
Q3N-Q3T	hsa-miR-582-5p	3.1341	2.161	-0.536352	0.0112539
Q3N-Q3T	hsa-miR-584-5p	2.5185	2.0778	-0.277508	0.219084
Q3N-Q3T	hsa-miR-589-5p	5.2888	7.1755	0.440139	0.00135651
Q3N-Q3T	hsa-miR-590-3p	1.1193	1.1359	0.0212391	0.948285
Q3N-Q3T	hsa-miR-598	5.5127	7.7573	0.492795	0.000218927
Q3N-Q3T	hsa-miR-628-3p	4.3374	2.2995	-0.91551	1.85224e-06
Q3N-Q3T	hsa-miR-628-5p	2.0148	1.8839	-0.0969142	0.691947
Q3N-Q3T	hsa-miR-629-5p	5.5407	9.4749	0.774042	9.84915e-10
Q3N-Q3T	hsa-miR-651	0.8955	1.0251	0.194999	0.578801
Q3N-Q3T	hsa-miR-6510-3p	1.5391	1.1913	-0.36955	0.208985
Q3N-Q3T	hsa-miR-652-3p	3.2461	2.9644	-0.130967	0.49893
Q3N-Q3T	hsa-miR-654-3p	13.5159	14.8219	0.133073	0.141714
Q3N-Q3T	hsa-miR-660-5p	12.3126	22.967	0.899427	2.58422e-27
Q3N-Q3T	hsa-miR-664a-3p	9.9061	11.3034	0.190368	0.0691706
Q3N-Q3T	hsa-miR-664a-5p	1.679	1.7731	0.0786717	0.763035
Q3N-Q3T	hsa-miR-671-3p	10.7176	14.157	0.401534	3.53398e-05
Q3N-Q3T	hsa-miR-708-5p	2.0148	2.0501	0.0250577	0.917104
Q3N-Q3T	hsa-miR-7-1-3p	0.9234	1.219	0.40067	0.229381
Q3N-Q3T	hsa-miR-744-3p	0.6156	1.3298	1.11114	0.00209628	**
Q3N-Q3T	hsa-miR-744-5p	26.1083	31.971	0.292255	3.98249e-06
Q3N-Q3T	hsa-miR-7-5p	2.7703	4.0172	0.536148	0.00412577
Q3N-Q3T	hsa-miR-769-5p	59.5482	90.1227	0.597833	4.99216e-51
Q3N-Q3T	hsa-miR-873-3p	1.3152	0.5541	-1.24706	0.000789389	**
Q3N-Q3T	hsa-miR-873-5p	2.1827	0.4433	-2.29976	2.52078e-11	**
Q3N-Q3T	hsa-miR-874	12.2287	15.3483	0.327808	0.000369043
Q3N-Q3T	hsa-miR-887	7.9192	4.8483	-0.707876	2.3334e-07
Q3N-Q3T	hsa-miR-889	1.679	2.0224	0.268466	0.286781
Q3N-Q3T	hsa-miR-92a-1-5p	0.2239	1.0528	2.2333	6.48056e-06	**
Q3N-Q3T	hsa-miR-92a-3p	1751.24	3109.91	0.828493	0
Q3N-Q3T	hsa-miR-92b-3p	307.395	176.394	-0.80129	1.29269e-282
Q3N-Q3T	hsa-miR-93-5p	110.814	256.405	1.21029	0	**
Q3N-Q3T	hsa-miR-941	119.488	172.904	0.533101	1.34639e-78
Q3N-Q3T	hsa-miR-9-5p	25.4647	7.6741	-1.73043	1.19898e-80	**
Q3N-Q3T	hsa-miR-96-5p	14.3834	47.5409	1.72476	5.38258e-148	**
Q3N-Q3T	hsa-miR-98-5p	212.169	225.764	0.0896037	9.88763e-05
Q3N-Q3T	hsa-miR-99a-3p	22.8903	35.434	0.630398	5.23078e-23
Q3N-Q3T	hsa-miR-99a-5p	7404.16	6980.78	-0.0849468	2.3933e-99
Q3N-Q3T	hsa-miR-99b-3p	4.1415	3.2691	-0.34126	0.0549708
Q3N-Q3T	hsa-miR-99b-5p	13256.4	9639.67	-0.459637	0

## Sheet: Q4N-Q4T
pairwise	miR-name	Q4N-std	Q4T-std	fold-change(log2 Q4T/Q4N)	p-value	sig-lable
Q4N-Q4T	hsa-let-7a-3p	4.1339	4.1106	-0.0081545	0.969931
Q4N-Q4T	hsa-let-7a-5p	3472.81	2936.88	-0.241819	0
Q4N-Q4T	hsa-let-7b-5p	607.948	467.654	-0.378509	3.62446e-152
Q4N-Q4T	hsa-let-7c	2136.23	1142.65	-0.90269	0
Q4N-Q4T	hsa-let-7d-3p	11.3627	12.8225	0.174372	0.0662396
Q4N-Q4T	hsa-let-7d-5p	115.174	73.4687	-0.648618	1.17993e-77
Q4N-Q4T	hsa-let-7e-3p	2.0338	1.7178	-0.243616	0.326953
Q4N-Q4T	hsa-let-7e-5p	194.735	104.145	-0.902927	4.4282e-228
Q4N-Q4T	hsa-let-7f-5p	4341.23	3752.15	-0.210388	0
Q4N-Q4T	hsa-let-7g-5p	1239.62	842.881	-0.556494	0
Q4N-Q4T	hsa-let-7i-3p	1.5917	1.1043	-0.527436	0.0732073
Q4N-Q4T	hsa-let-7i-5p	1307.93	955.4	-0.453104	0
Q4N-Q4T	hsa-miR-1	10.1689	6.3806	-0.6724	1.13973e-08
Q4N-Q4T	hsa-miR-100-3p	4.0676	2.3314	-0.802981	2.71049e-05
Q4N-Q4T	hsa-miR-100-5p	11648.6	17257.1	0.567032	0
Q4N-Q4T	hsa-miR-101-3p	756.503	445.843	-0.76281	0
Q4N-Q4T	hsa-miR-101-5p	2.8296	1.6872	-0.745967	0.00105039
Q4N-Q4T	hsa-miR-103a-3p	599.283	230.284	-1.37982	0	**
Q4N-Q4T	hsa-miR-106a-5p	2.1885	2.2393	0.0331054	0.869078
Q4N-Q4T	hsa-miR-106b-3p	26.0192	20.5528	-0.340242	8.9203e-07
Q4N-Q4T	hsa-miR-106b-5p	9.7489	9.3868	-0.054606	0.61646
Q4N-Q4T	hsa-miR-107	196.791	64.6341	-1.6063	0	**
Q4N-Q4T	hsa-miR-10a-5p	8019.21	12968.9	0.69352	0
Q4N-Q4T	hsa-miR-10b-3p	2.6528	3.0062	0.180425	0.352989
Q4N-Q4T	hsa-miR-10b-5p	68963.6	97728.6	0.502945	0
Q4N-Q4T	hsa-miR-1180	3.9792	4.3253	0.120322	0.452546
Q4N-Q4T	hsa-miR-1247-3p	0.7958	1.6872	1.08415	0.000375212	**
Q4N-Q4T	hsa-miR-1247-5p	1.039	5.6137	2.43376	1.80745e-31	**
Q4N-Q4T	hsa-miR-125a-3p	1.9675	2.086	0.0843755	0.70494
Q4N-Q4T	hsa-miR-125a-5p	2069.54	4391.43	1.08539	0	**
Q4N-Q4T	hsa-miR-125b-1-3p	66.4077	67.1802	0.0166856	0.678523
Q4N-Q4T	hsa-miR-125b-2-3p	322.024	263.567	-0.288998	8.00967e-50
Q4N-Q4T	hsa-miR-125b-5p	968.216	1077.77	0.154642	1.97166e-50
Q4N-Q4T	hsa-miR-126-3p	121.718	115.74	-0.0726538	0.0171255
Q4N-Q4T	hsa-miR-126-5p	1613.66	1836.26	0.186434	7.10106e-121
Q4N-Q4T	hsa-miR-1271-5p	27.0582	14.0802	-0.942398	1.47309e-35
Q4N-Q4T	hsa-miR-127-3p	1416.53	1003.53	-0.497282	0
Q4N-Q4T	hsa-miR-127-5p	2.5643	0.8282	-1.63051	6.17241e-09	**
Q4N-Q4T	hsa-miR-128	15.9387	30.4305	0.932984	1.60888e-40
Q4N-Q4T	hsa-miR-1287	1.6801	0.8589	-0.967985	0.00173775
Q4N-Q4T	hsa-miR-1291	0.42	1.1964	1.51024	0.000104383	**
Q4N-Q4T	hsa-miR-1296	9.4173	5.7364	-0.715168	6.75888e-09
Q4N-Q4T	hsa-miR-1299	1.2601	0.4295	-1.55281	9.55525e-05	**
Q4N-Q4T	hsa-miR-1301	1.1274	1.8099	0.682911	0.0129239
Q4N-Q4T	hsa-miR-1307-3p	8.1794	7.4236	-0.139876	0.243419
Q4N-Q4T	hsa-miR-1307-5p	5.8803	4.5707	-0.363475	0.0133603
Q4N-Q4T	hsa-miR-130a-3p	384.784	146.324	-1.39488	0	**
Q4N-Q4T	hsa-miR-130b-3p	5.4603	4.3253	-0.33618	0.0268101
Q4N-Q4T	hsa-miR-130b-5p	0.9064	3.7118	2.0339	2.66888e-17	**
Q4N-Q4T	hsa-miR-132-3p	2.3875	3.5891	0.588121	0.0022185
Q4N-Q4T	hsa-miR-132-5p	1.879	1.8406	-0.0297889	0.917049
Q4N-Q4T	hsa-miR-133a	285.836	153.287	-0.898949	0
Q4N-Q4T	hsa-miR-133b	7.9362	2.7915	-1.50741	2.53538e-22	**
Q4N-Q4T	hsa-miR-134	5.9466	5.0308	-0.241277	0.0918639
Q4N-Q4T	hsa-miR-135a-5p	8.732	6.8714	-0.345708	0.00395241
Q4N-Q4T	hsa-miR-136-3p	40.8748	19.8473	-1.04227	5.06913e-62	**
Q4N-Q4T	hsa-miR-136-5p	9.4394	5.6444	-0.741875	2.07973e-09
Q4N-Q4T	hsa-miR-139-5p	2.078	1.3191	-0.655642	0.0124276
Q4N-Q4T	hsa-miR-140-3p	130.583	89.1747	-0.550256	5.77605e-66
Q4N-Q4T	hsa-miR-140-5p	3.6255	3.6198	-0.00226999	0.999969
Q4N-Q4T	hsa-miR-141-3p	1328.48	2710.58	1.02882	0	**
Q4N-Q4T	hsa-miR-141-5p	9.1742	12.9145	0.493338	7.90451e-07
Q4N-Q4T	hsa-miR-142-3p	7.4278	6.626	-0.164797	0.192215
Q4N-Q4T	hsa-miR-142-5p	276.529	303.538	0.134444	4.70498e-12
Q4N-Q4T	hsa-miR-143-3p	492177	465822	-0.0793991	0
Q4N-Q4T	hsa-miR-143-5p	25.5329	20.3688	-0.325996	2.92562e-06
Q4N-Q4T	hsa-miR-144-3p	2.1664	1.1657	-0.894103	0.00084209
Q4N-Q4T	hsa-miR-144-5p	4.1118	2.2087	-0.896573	3.60795e-06
Q4N-Q4T	hsa-miR-145-3p	648.514	955.983	0.559848	0
Q4N-Q4T	hsa-miR-145-5p	3255.88	1253.02	-1.37764	0	**
Q4N-Q4T	hsa-miR-1468	6.9856	11.6875	0.74251	1.17121e-11
Q4N-Q4T	hsa-miR-146a-5p	284.288	771.345	1.44002	0	**
Q4N-Q4T	hsa-miR-146b-3p	5.8361	6.6873	0.196419	0.135661
Q4N-Q4T	hsa-miR-146b-5p	1509.32	1813.74	0.265075	2.76835e-233
Q4N-Q4T	hsa-miR-148a-3p	4820.13	11036.6	1.19515	0	**
Q4N-Q4T	hsa-miR-148a-5p	76.2008	110.801	0.540095	1.49101e-55
Q4N-Q4T	hsa-miR-148b-3p	51.7953	49.5415	-0.0641836	0.169536
Q4N-Q4T	hsa-miR-148b-5p	8.2457	6.718	-0.29561	0.0157402
Q4N-Q4T	hsa-miR-149-5p	18.9894	11.9943	-0.662845	1.23882e-14
Q4N-Q4T	hsa-miR-150-5p	28.3625	39.1424	0.464748	4.23496e-16
Q4N-Q4T	hsa-miR-151a-3p	804.209	876.686	0.124489	1.19224e-27
Q4N-Q4T	hsa-miR-151a-5p	597.669	618.211	0.0487524	0.000284494
Q4N-Q4T	hsa-miR-151b	40.2779	36.8417	-0.128649	0.0163229
Q4N-Q4T	hsa-miR-152	45.5834	35.7987	-0.348601	2.77779e-11
Q4N-Q4T	hsa-miR-153	1.2601	2.4234	0.943494	0.000145236
Q4N-Q4T	hsa-miR-154-5p	1.4369	0.3068	-2.22759	1.10453e-07	**
Q4N-Q4T	hsa-miR-155-5p	89.6194	51.7195	-0.793103	1.63731e-85
Q4N-Q4T	hsa-miR-15a-5p	72.6417	80.0333	0.139802	0.00022387
Q4N-Q4T	hsa-miR-15b-5p	10.1247	12.2397	0.273689	0.00564662
Q4N-Q4T	hsa-miR-16-2-3p	2.8517	2.2087	-0.368625	0.0827066
Q4N-Q4T	hsa-miR-16-5p	1579.02	1063.65	-0.569996	0
Q4N-Q4T	hsa-miR-17-3p	3.4928	4.3253	0.308416	0.0644858
Q4N-Q4T	hsa-miR-17-5p	6.0129	9.9083	0.720577	1.17219e-09
Q4N-Q4T	hsa-miR-181a-2-3p	37.4925	24.3566	-0.622289	1.12301e-24
Q4N-Q4T	hsa-miR-181a-3p	15.9387	7.2395	-1.13857	8.79313e-29	**
Q4N-Q4T	hsa-miR-181a-5p	4373.47	3166.79	-0.465755	0
Q4N-Q4T	hsa-miR-181b-5p	219.207	123.746	-0.824909	1.58425e-220
Q4N-Q4T	hsa-miR-181c-3p	25.2676	17.4852	-0.531154	2.81109e-13
Q4N-Q4T	hsa-miR-181c-5p	460.145	359.122	-0.357613	3.18607e-104
Q4N-Q4T	hsa-miR-181d	56.1061	44.2346	-0.342982	3.44131e-13
Q4N-Q4T	hsa-miR-182-5p	1496.85	2942.43	0.975081	0
Q4N-Q4T	hsa-miR-183-5p	428.621	828.893	0.951482	0
Q4N-Q4T	hsa-miR-184	41.8916	7.0248	-2.57613	7.15046e-220	**
Q4N-Q4T	hsa-miR-185-5p	2.1885	1.135	-0.94725	0.000428756
Q4N-Q4T	hsa-miR-186-5p	1865.32	915.92	-1.02613	0	**
Q4N-Q4T	hsa-miR-187-3p	4.775	1.4724	-1.69733	2.63926e-16	**
Q4N-Q4T	hsa-miR-190a	1.6801	0.7055	-1.25183	0.000118445	**
Q4N-Q4T	hsa-miR-190b	1.5253	2.2393	0.553955	0.021858
Q4N-Q4T	hsa-miR-191-5p	7310.28	8385.71	0.198006	0
Q4N-Q4T	hsa-miR-192-5p	374.593	305.869	-0.29241	6.40634e-59
Q4N-Q4T	hsa-miR-193a-3p	1.3706	0.3068	-2.15944	3.7047e-07	**
Q4N-Q4T	hsa-miR-193a-5p	1.4148	1.2577	-0.16981	0.571366
Q4N-Q4T	hsa-miR-193b-3p	18.0609	11.9022	-0.601642	5.12049e-12
Q4N-Q4T	hsa-miR-194-5p	10.1689	4.8161	-1.07823	1.79927e-17	**
Q4N-Q4T	hsa-miR-195-3p	4.576	5.675	0.310533	0.0332528
Q4N-Q4T	hsa-miR-195-5p	140.619	152.704	0.118952	1.3548e-05
Q4N-Q4T	hsa-miR-196a-5p	0.42	5.0002	3.57352	2.26203e-41	**
Q4N-Q4T	hsa-miR-196b-5p	167.279	150.987	-0.147838	1.9896e-08
Q4N-Q4T	hsa-miR-197-3p	4.576	3.8345	-0.255049	0.119631
Q4N-Q4T	hsa-miR-199a-3p	2215.42	1241.24	-0.835798	0
Q4N-Q4T	hsa-miR-199a-5p	260.369	228.505	-0.188337	8.22667e-19
Q4N-Q4T	hsa-miR-199b-3p	2214.64	1240.96	-0.835615	0
Q4N-Q4T	hsa-miR-199b-5p	222.346	176.11	-0.33633	6.20061e-46
Q4N-Q4T	hsa-miR-19a-3p	13.8386	5.4603	-1.34165	4.93889e-32	**
Q4N-Q4T	hsa-miR-19b-3p	187.661	47.4556	-1.98348	0	**
Q4N-Q4T	hsa-miR-200a-3p	39.3273	70.984	0.851963	3.88839e-79
Q4N-Q4T	hsa-miR-200a-5p	2.697	2.9142	0.111744	0.562958
Q4N-Q4T	hsa-miR-200b-3p	91.3658	223.198	1.2886	0	**
Q4N-Q4T	hsa-miR-200b-5p	2.3212	3.3437	0.526575	0.00752803
Q4N-Q4T	hsa-miR-200c-3p	62.6717	114.82	0.873485	2.83567e-132
Q4N-Q4T	hsa-miR-203a	57.2998	33.6514	-0.767864	1.95617e-52
Q4N-Q4T	hsa-miR-204-5p	394.356	130.004	-1.60094	0	**
Q4N-Q4T	hsa-miR-205-5p	964.083	387.988	-1.31314	0	**
Q4N-Q4T	hsa-miR-20a-5p	12.2691	14.3256	0.223566	0.0136392
Q4N-Q4T	hsa-miR-20b-5p	9.1078	7.853	-0.213859	0.0625378
Q4N-Q4T	hsa-miR-210	5.814	3.6811	-0.659394	2.28605e-05
Q4N-Q4T	hsa-miR-212-3p	1.3927	1.6258	0.223265	0.398592
Q4N-Q4T	hsa-miR-212-5p	3.5591	6.5953	0.889926	2.49774e-09
Q4N-Q4T	hsa-miR-21-3p	166.218	225.222	0.438272	3.60521e-76
Q4N-Q4T	hsa-miR-214-3p	15.8282	10.9513	-0.531395	7.5218e-09
Q4N-Q4T	hsa-miR-214-5p	8.4446	6.5953	-0.356591	0.00353005
Q4N-Q4T	hsa-miR-215	0.8621	1.4111	0.710893	0.0228792
Q4N-Q4T	hsa-miR-21-5p	4128.75	4357.08	0.0776565	1.21155e-52
Q4N-Q4T	hsa-miR-218-1-3p	3.6476	5.399	0.565745	0.000293993
Q4N-Q4T	hsa-miR-218-5p	34.6629	20.3381	-0.769207	1.75684e-32
Q4N-Q4T	hsa-miR-221-3p	2314.47	433.757	-2.41573	0	**
Q4N-Q4T	hsa-miR-221-5p	87.1214	38.4062	-1.18169	1.42319e-158	**
Q4N-Q4T	hsa-miR-222-3p	757.41	259.947	-1.54285	0	**
Q4N-Q4T	hsa-miR-223-3p	17.5525	13.252	-0.405466	2.02591e-06
Q4N-Q4T	hsa-miR-22-3p	7547.57	4808.1	-0.650544	0
Q4N-Q4T	hsa-miR-224-5p	13.6839	10.031	-0.448014	4.28115e-06
Q4N-Q4T	hsa-miR-22-5p	2.697	1.7178	-0.650793	0.00455814
Q4N-Q4T	hsa-miR-2355-5p	1.1274	0.2454	-2.19979	3.36896e-06	**
Q4N-Q4T	hsa-miR-23a-3p	125.785	130.434	0.0523522	0.0733606
Q4N-Q4T	hsa-miR-23b-3p	367.895	295.347	-0.316881	4.32184e-67
Q4N-Q4T	hsa-miR-24-1-5p	1.7243	1.227	-0.490876	0.0803923
Q4N-Q4T	hsa-miR-24-2-5p	2.9623	1.8712	-0.662754	0.0024965
Q4N-Q4T	hsa-miR-24-3p	374.858	278.598	-0.42816	2.41068e-118
Q4N-Q4T	hsa-miR-25-3p	497.925	456.917	-0.123996	3.36255e-16
Q4N-Q4T	hsa-miR-26a-5p	21728.5	18029.1	-0.269264	0
Q4N-Q4T	hsa-miR-26b-3p	10.0584	7.3622	-0.450192	7.62226e-05
Q4N-Q4T	hsa-miR-26b-5p	1998.2	1279.18	-0.643476	0
Q4N-Q4T	hsa-miR-27a-3p	468.634	382.068	-0.294632	2.78234e-74
Q4N-Q4T	hsa-miR-27a-5p	0.4863	2.4541	2.33528	5.94275e-14	**
Q4N-Q4T	hsa-miR-27b-3p	27609.6	16517.1	-0.741212	0
Q4N-Q4T	hsa-miR-27b-5p	64.6391	42.5781	-0.602296	4.0692e-39
Q4N-Q4T	hsa-miR-28-3p	715.872	625.481	-0.194736	5.64339e-52
Q4N-Q4T	hsa-miR-28-5p	118.004	134.514	0.188917	1.44737e-10
Q4N-Q4T	hsa-miR-299-3p	2.2327	0.8282	-1.43074	8.36652e-07	**
Q4N-Q4T	hsa-miR-29a-3p	558.872	331.913	-0.751713	0
Q4N-Q4T	hsa-miR-29b-3p	19.0778	9.9697	-0.936273	2.73441e-25
Q4N-Q4T	hsa-miR-29c-3p	144.067	105.157	-0.454201	9.34604e-52
Q4N-Q4T	hsa-miR-29c-5p	4.2886	3.6504	-0.232452	0.168539
Q4N-Q4T	hsa-miR-301a-3p	31.1258	15.7981	-0.97836	3.89181e-43
Q4N-Q4T	hsa-miR-301b	1.1495	1.6872	0.553625	0.0464297
Q4N-Q4T	hsa-miR-30a-3p	204.948	119.544	-0.777721	9.26221e-187
Q4N-Q4T	hsa-miR-30a-5p	12798	5774.15	-1.14824	0	**
Q4N-Q4T	hsa-miR-30b-5p	96.5608	77.2112	-0.322627	1.98012e-19
Q4N-Q4T	hsa-miR-30c-1-3p	8.1794	4.8468	-0.754962	1.5145e-08
Q4N-Q4T	hsa-miR-30c-2-3p	16.403	7.0248	-1.22343	6.481e-33	**
Q4N-Q4T	hsa-miR-30c-5p	229.288	160.803	-0.511866	1.22966e-100
Q4N-Q4T	hsa-miR-30d-3p	13.8828	14.1416	0.0266468	0.758517
Q4N-Q4T	hsa-miR-30d-5p	1615.18	1797.7	0.154453	1.06934e-82
Q4N-Q4T	hsa-miR-30e-3p	82.3685	73.2846	-0.168583	7.71816e-06
Q4N-Q4T	hsa-miR-30e-5p	973.765	702.447	-0.471185	0
Q4N-Q4T	hsa-miR-31-5p	2.697	13.4667	2.31997	4.40058e-69	**
Q4N-Q4T	hsa-miR-320a	165.555	72.6405	-1.18846	3.38926e-302	**
Q4N-Q4T	hsa-miR-320b	17.8841	8.0678	-1.14843	1.61188e-32	**
Q4N-Q4T	hsa-miR-324-3p	0.84	1.135	0.434231	0.188615
Q4N-Q4T	hsa-miR-324-5p	3.0507	1.9326	-0.658597	0.00226936
Q4N-Q4T	hsa-miR-32-5p	1.8569	3.2823	0.821811	8.50235e-05
Q4N-Q4T	hsa-miR-328	27.9646	15.2152	-0.878088	8.4862e-33
Q4N-Q4T	hsa-miR-330-5p	2.6307	1.9633	-0.422166	0.0587584
Q4N-Q4T	hsa-miR-331-5p	1.3043	1.227	-0.0881405	0.783422
Q4N-Q4T	hsa-miR-335-3p	7.9141	8.7426	0.143637	0.208008
Q4N-Q4T	hsa-miR-335-5p	10.8321	8.0678	-0.425066	9.83731e-05
Q4N-Q4T	hsa-miR-338-3p	11.8269	23.375	0.982894	2.92354e-34
Q4N-Q4T	hsa-miR-338-5p	1.2822	1.9939	0.636972	0.0141692
Q4N-Q4T	hsa-miR-339-3p	3.9349	5.2456	0.414781	0.00725615
Q4N-Q4T	hsa-miR-339-5p	3.1612	3.8345	0.278566	0.113621
Q4N-Q4T	hsa-miR-33b-5p	1.2601	0.9203	-0.453362	0.167595
Q4N-Q4T	hsa-miR-340-3p	1.0611	1.9326	0.864982	0.00161851
Q4N-Q4T	hsa-miR-340-5p	78.2567	32.7005	-1.2589	3.196e-157	**
Q4N-Q4T	hsa-miR-342-3p	138.895	160.404	0.207721	1.67712e-14
Q4N-Q4T	hsa-miR-342-5p	2.6086	2.1473	-0.280752	0.200775
Q4N-Q4T	hsa-miR-345-5p	38.0009	45.6764	0.265415	2.16626e-07
Q4N-Q4T	hsa-miR-34a-5p	71.8016	27.7923	-1.36933	6.56014e-164	**
Q4N-Q4T	hsa-miR-34b-5p	1.4148	0.4295	-1.71987	8.51191e-06	**
Q4N-Q4T	hsa-miR-34c-5p	19.1442	5.9818	-1.67826	6.90151e-60	**
Q4N-Q4T	hsa-miR-3605-3p	0.9064	1.7178	0.922342	0.00169401
Q4N-Q4T	hsa-miR-3605-5p	2.9844	2.362	-0.337432	0.102346
Q4N-Q4T	hsa-miR-3607-3p	1.5032	1.2884	-0.222456	0.444222
Q4N-Q4T	hsa-miR-3613-5p	1.3264	1.5338	0.209594	0.439234
Q4N-Q4T	hsa-miR-361-3p	15.8724	13.6814	-0.214304	0.0135381
Q4N-Q4T	hsa-miR-3615	1.0169	1.7178	0.756384	0.00807402
Q4N-Q4T	hsa-miR-361-5p	65.855	67.3949	0.0333464	0.409726
Q4N-Q4T	hsa-miR-3617-5p	1.3927	0.2454	-2.50468	2.23897e-08	**
Q4N-Q4T	hsa-miR-362-5p	4.3329	1.6872	-1.3607	3.13221e-11	**
Q4N-Q4T	hsa-miR-363-3p	238.219	271.083	0.186446	2.60676e-19
Q4N-Q4T	hsa-miR-3651	0.42	1.0123	1.26918	0.00178326	**
Q4N-Q4T	hsa-miR-365a-3p	13.5512	10.8286	-0.323574	0.000729119
Q4N-Q4T	hsa-miR-365b-3p	13.5512	10.8286	-0.323574	0.000729119
Q4N-Q4T	hsa-miR-369-3p	0.8843	1.0737	0.279983	0.392742
Q4N-Q4T	hsa-miR-369-5p	2.6528	1.6872	-0.652885	0.00478532
Q4N-Q4T	hsa-miR-370	1.1937	1.4418	0.272431	0.337187
Q4N-Q4T	hsa-miR-374a-3p	19.6526	11.6875	-0.749754	2.42051e-18
Q4N-Q4T	hsa-miR-374a-5p	29.7994	28.4365	-0.0675394	0.274029
Q4N-Q4T	hsa-miR-374b-3p	3.3602	1.3497	-1.31591	1.25072e-08	**
Q4N-Q4T	hsa-miR-374b-5p	44.5444	31.4734	-0.501111	3.49167e-20
Q4N-Q4T	hsa-miR-375	1219.7	4238.94	1.79718	0	**
Q4N-Q4T	hsa-miR-376c-3p	2.2991	1.1657	-0.979873	0.000204096
Q4N-Q4T	hsa-miR-377-3p	1.1495	1.0737	-0.0984155	0.773785
Q4N-Q4T	hsa-miR-378a-3p	551.732	311.606	-0.824246	0
Q4N-Q4T	hsa-miR-378a-5p	2.6528	1.5338	-0.790406	0.000858794
Q4N-Q4T	hsa-miR-378c	20.4926	11.5955	-0.821538	4.97754e-22
Q4N-Q4T	hsa-miR-378d	4.775	2.6074	-0.872889	1.03538e-06
Q4N-Q4T	hsa-miR-379-5p	2.4317	1.3804	-0.816879	0.00103819
Q4N-Q4T	hsa-miR-381-3p	49.0541	26.2585	-0.901589	1.01362e-58
Q4N-Q4T	hsa-miR-382-5p	1.7243	1.135	-0.603318	0.0349536
Q4N-Q4T	hsa-miR-383	2.9623	0.6135	-2.27158	7.67673e-15	**
Q4N-Q4T	hsa-miR-3909	1.3927	1.227	-0.182749	0.545868
Q4N-Q4T	hsa-miR-3912	2.1443	1.0737	-0.997916	0.000274019
Q4N-Q4T	hsa-miR-3943	1.6138	0.1841	-3.1319	1.31784e-11	**
Q4N-Q4T	hsa-miR-409-3p	33.4691	33.8048	0.0143984	0.797791
Q4N-Q4T	hsa-miR-409-5p	11.8711	12.209	0.0404914	0.66656
Q4N-Q4T	hsa-miR-410	16.7788	12.4544	-0.429984	9.40609e-07
Q4N-Q4T	hsa-miR-411-5p	58.7367	45.2469	-0.376443	4.60047e-16
Q4N-Q4T	hsa-miR-421	30.9048	18.3135	-0.754923	2.90154e-28
Q4N-Q4T	hsa-miR-423-3p	81.7274	137.643	0.752035	1.83958e-122
Q4N-Q4T	hsa-miR-423-5p	90.3931	68.5299	-0.399479	1.75884e-26
Q4N-Q4T	hsa-miR-424-3p	2.1222	0.6135	-1.79043	1.778e-08	**
Q4N-Q4T	hsa-miR-424-5p	40.8305	4.8775	-3.06543	3.50416e-256	**
Q4N-Q4T	hsa-miR-425-3p	5.5266	4.4173	-0.323227	0.0318177
Q4N-Q4T	hsa-miR-425-5p	15.4082	19.6939	0.35405	7.562e-06
Q4N-Q4T	hsa-miR-429	49.8721	69.1127	0.470718	8.1113e-28
Q4N-Q4T	hsa-miR-432-5p	7.3614	5.3683	-0.455515	0.000632183
Q4N-Q4T	hsa-miR-4449	0.619	1.3191	1.09154	0.0015631	**
Q4N-Q4T	hsa-miR-4454	6.0572	2.6381	-1.19915	9.81408e-13	**
Q4N-Q4T	hsa-miR-4485	2.4538	7.1782	1.5486	2.78661e-22	**
Q4N-Q4T	hsa-miR-449a	0.0884	2.4541	4.795	1.16005e-25	**
Q4N-Q4T	hsa-miR-450a-5p	4.5539	2.2087	-1.04391	3.18613e-08	**
Q4N-Q4T	hsa-miR-450b-5p	7.5162	3.6198	-1.05409	7.22319e-13	**
Q4N-Q4T	hsa-miR-451a	66.6508	41.9032	-0.669562	3.2344e-48
Q4N-Q4T	hsa-miR-452-3p	1.0611	0.5828	-0.864488	0.0247023
Q4N-Q4T	hsa-miR-452-5p	7.3172	3.4357	-1.09069	3.42776e-13	**
Q4N-Q4T	hsa-miR-454-3p	21.0011	9.1721	-1.19514	3.00306e-40	**
Q4N-Q4T	hsa-miR-454-5p	1.4369	1.6872	0.231671	0.373707
Q4N-Q4T	hsa-miR-455-3p	1.9012	1.2884	-0.56133	0.0377081
Q4N-Q4T	hsa-miR-455-5p	22.7475	7.6076	-1.58019	3.37897e-65	**
Q4N-Q4T	hsa-miR-4677-3p	1.7464	1.2577	-0.473596	0.0885827
Q4N-Q4T	hsa-miR-4770	2.1664	2.0246	-0.0976627	0.683695
Q4N-Q4T	hsa-miR-484	9.5279	22.8535	1.26218	1.40863e-49	**
Q4N-Q4T	hsa-miR-485-5p	1.2159	0.7055	-0.785307	0.026399
Q4N-Q4T	hsa-miR-486-3p	0.6411	1.0123	0.659016	0.0708313
Q4N-Q4T	hsa-miR-486-5p	460.123	453.205	-0.0218542	0.159271
Q4N-Q4T	hsa-miR-487b	2.0559	1.5645	-0.394068	0.11842
Q4N-Q4T	hsa-miR-488-3p	1.3264	0.2147	-2.62712	2.16977e-08	**
Q4N-Q4T	hsa-miR-490-3p	6.0793	0.3681	-4.04574	2.97077e-49	**
Q4N-Q4T	hsa-miR-493-3p	2.078	1.5951	-0.381549	0.127771
Q4N-Q4T	hsa-miR-493-5p	37.7135	14.2336	-1.40578	2.11033e-90	**
Q4N-Q4T	hsa-miR-497-5p	61.7432	58.3148	-0.0824182	0.0547029
Q4N-Q4T	hsa-miR-500a-3p	153.485	108.47	-0.500801	2.06861e-65
Q4N-Q4T	hsa-miR-501-3p	167.279	138.594	-0.271397	7.07061e-24
Q4N-Q4T	hsa-miR-502-3p	18.6136	9.5402	-0.964266	7.25359e-26
Q4N-Q4T	hsa-miR-504	3.316	3.6811	0.150693	0.388379
Q4N-Q4T	hsa-miR-505-3p	3.1833	1.8712	-0.766559	0.000368833
Q4N-Q4T	hsa-miR-532-3p	1.7464	0.6749	-1.37164	2.54207e-05	**
Q4N-Q4T	hsa-miR-532-5p	205.192	92.7025	-1.14629	0	**
Q4N-Q4T	hsa-miR-542-3p	9.2626	1.6565	-2.48328	5.62718e-48	**
Q4N-Q4T	hsa-miR-548k	3.316	3.1903	-0.0557519	0.772836
Q4N-Q4T	hsa-miR-561-5p	2.2549	3.1289	0.472592	0.0191309
Q4N-Q4T	hsa-miR-574-3p	84.0044	39.2038	-1.09947	1.21705e-136	**
Q4N-Q4T	hsa-miR-574-5p	6.4993	3.221	-1.01278	1.07729e-10	**
Q4N-Q4T	hsa-miR-577	0.5527	3.0676	2.47254	3.3683e-18	**
Q4N-Q4T	hsa-miR-582-3p	32.1648	18.6509	-0.786237	2.35435e-31
Q4N-Q4T	hsa-miR-582-5p	5.2392	3.9265	-0.416103	0.00811284
Q4N-Q4T	hsa-miR-584-5p	1.3043	1.4724	0.174894	0.522121
Q4N-Q4T	hsa-miR-589-5p	4.7087	7.6076	0.692113	2.6653e-07
Q4N-Q4T	hsa-miR-590-3p	2.0338	1.2884	-0.658597	0.0130601
Q4N-Q4T	hsa-miR-598	4.9076	3.0983	-0.663541	9.24973e-05
Q4N-Q4T	hsa-miR-615-3p	0.0442	1.5338	5.11692	5.06366e-17	**
Q4N-Q4T	hsa-miR-625-5p	1.039	0.7669	-0.438085	0.227298
Q4N-Q4T	hsa-miR-628-3p	2.6086	2.6995	0.0494165	0.79673
Q4N-Q4T	hsa-miR-628-5p	2.9623	2.4234	-0.289685	0.159263
Q4N-Q4T	hsa-miR-629-5p	3.0286	1.9326	-0.648108	0.00271445
Q4N-Q4T	hsa-miR-641	2.7854	1.227	-1.18275	1.88523e-06	**
Q4N-Q4T	hsa-miR-6510-3p	0.4421	1.1657	1.39875	0.00030058	**
Q4N-Q4T	hsa-miR-652-3p	3.736	3.5277	-0.0827666	0.644576
Q4N-Q4T	hsa-miR-654-3p	23.477	28.2525	0.26713	4.0603e-05
Q4N-Q4T	hsa-miR-660-5p	71.7132	36.2896	-0.982683	9.04687e-98
Q4N-Q4T	hsa-miR-664a-3p	20.2274	10.0924	-1.00304	9.86599e-30	**
Q4N-Q4T	hsa-miR-664a-5p	2.1001	1.3804	-0.605372	0.0192412
Q4N-Q4T	hsa-miR-671-3p	9.7268	16.9331	0.799809	2.99209e-18
Q4N-Q4T	hsa-miR-708-3p	1.1053	1.5031	0.443503	0.123963
Q4N-Q4T	hsa-miR-708-5p	3.8686	5.9204	0.613883	4.49978e-05
Q4N-Q4T	hsa-miR-7-1-3p	1.0169	1.135	0.158514	0.605237
Q4N-Q4T	hsa-miR-744-5p	27.6772	15.7674	-0.811753	1.21857e-28
Q4N-Q4T	hsa-miR-7-5p	1.1495	1.2577	0.129781	0.652949
Q4N-Q4T	hsa-miR-769-5p	74.9186	72.6405	-0.0445498	0.249743
Q4N-Q4T	hsa-miR-873-3p	6.1677	1.3804	-2.15965	9.46685e-28	**
Q4N-Q4T	hsa-miR-873-5p	14.4355	1.2577	-3.52076	1.49908e-103	**
Q4N-Q4T	hsa-miR-874	8.1131	8.3745	0.0457498	0.685597
Q4N-Q4T	hsa-miR-887	13.9491	6.5953	-1.08066	1.75068e-23	**
Q4N-Q4T	hsa-miR-889	6.654	4.9081	-0.439057	0.0016934
Q4N-Q4T	hsa-miR-92a-3p	1374.13	1865.18	0.440795	0
Q4N-Q4T	hsa-miR-92b-3p	117.474	381.332	1.69871	0	**
Q4N-Q4T	hsa-miR-93-5p	114.467	120.464	0.0736715	0.0158467
Q4N-Q4T	hsa-miR-941	91.2553	119.329	0.386966	5.01644e-33
Q4N-Q4T	hsa-miR-944	1.0611	0.3681	-1.52739	0.000420776	**
Q4N-Q4T	hsa-miR-9-5p	1.4148	14.0495	3.31185	8.10628e-106	**
Q4N-Q4T	hsa-miR-96-5p	18.8568	34.8785	0.887253	1.5159e-42
Q4N-Q4T	hsa-miR-98-5p	199.665	137.612	-0.536977	1.16496e-95
Q4N-Q4T	hsa-miR-99a-3p	31.988	13.8655	-1.20603	2.96412e-61	**
Q4N-Q4T	hsa-miR-99a-5p	7005.1	6712.09	-0.0616428	1.87514e-53
Q4N-Q4T	hsa-miR-99b-3p	5.7256	3.313	-0.789289	8.92023e-07
Q4N-Q4T	hsa-miR-99b-5p	11511.1	17051.9	0.566906	0

## Sheet: Q5N-Q5T
pairwise	miR-name	Q5N-std	Q5T-std	fold-change(log2 Q5T/Q5N)	p-value	sig-lable
Q5N-Q5T	hsa-let-7a-3p	0.9065	4.7234	2.38145	4.48328e-23	**
Q5N-Q5T	hsa-let-7a-5p	3446.43	4064.55	0.237994	0
Q5N-Q5T	hsa-let-7b-3p	0.8188	1.621	0.985301	0.00238799
Q5N-Q5T	hsa-let-7b-5p	266.192	780.17	1.55132	0	**
Q5N-Q5T	hsa-let-7c	1273.35	2526.76	0.98866	0
Q5N-Q5T	hsa-let-7d-3p	11.5507	31.7781	1.46005	2.52333e-76	**
Q5N-Q5T	hsa-let-7d-5p	85.358	122.696	0.523495	4.29211e-53
Q5N-Q5T	hsa-let-7e-3p	1.2574	3.5775	1.50851	2.4086e-10	**
Q5N-Q5T	hsa-let-7e-5p	502.089	209.394	-1.26172	0	**
Q5N-Q5T	hsa-let-7f-5p	4940.94	4179.76	-0.241367	0
Q5N-Q5T	hsa-let-7g-5p	244.582	1027.8	2.07117	0	**
Q5N-Q5T	hsa-let-7i-5p	1247.59	1279.34	0.0362572	0.000187755
Q5N-Q5T	hsa-miR-1	1.1697	5.3662	2.19776	9.57683e-24	**
Q5N-Q5T	hsa-miR-100-3p	0.6433	3.0185	2.23027	3.3425e-14	**
Q5N-Q5T	hsa-miR-100-5p	11472.8	16874.1	0.556593	0
Q5N-Q5T	hsa-miR-101-3p	121.852	382.874	1.65174	0	**
Q5N-Q5T	hsa-miR-101-5p	0.01	2.4316	7.92576	4.62276e-26	**
Q5N-Q5T	hsa-miR-103a-3p	308.652	337.876	0.130516	1.07204e-11
Q5N-Q5T	hsa-miR-106a-5p	0.3509	1.7328	2.30397	5.3193e-09	**
Q5N-Q5T	hsa-miR-106b-3p	21.0544	26.5237	0.33316	2.73571e-06
Q5N-Q5T	hsa-miR-106b-5p	2.1639	9.2791	2.10035	8.15576e-38	**
Q5N-Q5T	hsa-miR-107	134.485	95.6417	-0.491733	4.2991e-52
Q5N-Q5T	hsa-miR-10a-5p	7299.85	10906.1	0.579203	0
Q5N-Q5T	hsa-miR-10b-3p	0.01	1.9564	7.61206	4.14319e-21	**
Q5N-Q5T	hsa-miR-10b-5p	97269.8	88604.3	-0.134616	0
Q5N-Q5T	hsa-miR-1180	2.778	5.3383	0.942334	9.26488e-08
Q5N-Q5T	hsa-miR-1247-3p	2.8365	2.3757	-0.255759	0.232778
Q5N-Q5T	hsa-miR-1247-5p	10.0593	9.0834	-0.147226	0.186988
Q5N-Q5T	hsa-miR-125a-3p	1.9592	2.8788	0.555203	0.0136238
Q5N-Q5T	hsa-miR-125a-5p	4250.09	5361.86	0.33524	0
Q5N-Q5T	hsa-miR-125b-1-3p	43.6001	60.6774	0.476828	4.01628e-23
Q5N-Q5T	hsa-miR-125b-2-3p	217.387	423.624	0.962522	0
Q5N-Q5T	hsa-miR-125b-5p	677.513	1464.39	1.11198	0	**
Q5N-Q5T	hsa-miR-1262	1.7545	0.6428	-1.44862	1.65047e-05	**
Q5N-Q5T	hsa-miR-126-3p	10.8781	134.714	3.63041	0	**
Q5N-Q5T	hsa-miR-126-5p	170.394	2188.3	3.68286	0	**
Q5N-Q5T	hsa-miR-1271-5p	12.8373	20.2072	0.654528	2.90789e-14
Q5N-Q5T	hsa-miR-127-3p	745.326	2284.78	1.61611	0	**
Q5N-Q5T	hsa-miR-127-5p	1.696	2.8229	0.735042	0.00172411
Q5N-Q5T	hsa-miR-128	6.6965	35.691	2.41408	1.57989e-166	**
Q5N-Q5T	hsa-miR-1285-3p	0.01	1.0062	6.65277	3.32815e-11	**
Q5N-Q5T	hsa-miR-1291	0.01	2.208	7.7866	9.89596e-24	**
Q5N-Q5T	hsa-miR-1296	3.626	17.9713	2.30924	1.87012e-80	**
Q5N-Q5T	hsa-miR-1299	2.1639	6.1208	1.50009	1.41681e-16	**
Q5N-Q5T	hsa-miR-1301	0.1462	1.7328	3.56709	2.80191e-13	**
Q5N-Q5T	hsa-miR-1306-5p	1.7253	0.1677	-3.36289	7.86689e-13	**
Q5N-Q5T	hsa-miR-1307-3p	3.3044	13.3038	2.00938	1.25157e-50	**
Q5N-Q5T	hsa-miR-1307-5p	5.3221	5.4501	0.0342871	0.819112
Q5N-Q5T	hsa-miR-130a-3p	232.008	201.764	-0.201501	8.48696e-18
Q5N-Q5T	hsa-miR-130b-3p	2.4271	4.5836	0.917248	1.3228e-06
Q5N-Q5T	hsa-miR-130b-5p	0.965	2.9067	1.59078	3.05791e-09	**
Q5N-Q5T	hsa-miR-132-3p	2.1639	8.9158	2.04273	3.56456e-35	**
Q5N-Q5T	hsa-miR-132-5p	1.3159	3.3818	1.36174	1.19228e-08	**
Q5N-Q5T	hsa-miR-133a	283.006	465.212	0.717056	0
Q5N-Q5T	hsa-miR-133b	4.5618	11.2355	1.30039	8.41545e-24	**
Q5N-Q5T	hsa-miR-134	2.8073	8.9717	1.6762	1.96966e-27	**
Q5N-Q5T	hsa-miR-135a-5p	0.01	10.3691	10.0181	8.51375e-109	**
Q5N-Q5T	hsa-miR-136-3p	1.5791	32.7004	4.37213	1.88947e-263	**
Q5N-Q5T	hsa-miR-136-5p	0.2047	10.1735	5.63516	1.16972e-94	**
Q5N-Q5T	hsa-miR-139-3p	1.1697	1.0621	-0.139219	0.669803
Q5N-Q5T	hsa-miR-139-5p	2.8657	7.0432	1.29734	1.96695e-15	**
Q5N-Q5T	hsa-miR-140-3p	121.56	131.025	0.108178	0.000429399
Q5N-Q5T	hsa-miR-140-5p	0.01	4.919	8.94222	5.46326e-52	**
Q5N-Q5T	hsa-miR-141-3p	7.5445	2230.98	8.20804	0	**
Q5N-Q5T	hsa-miR-141-5p	0.0292	10.3132	8.46431	5.92099e-106	**
Q5N-Q5T	hsa-miR-142-3p	0.01	5.506	9.10486	4.1662e-58	**
Q5N-Q5T	hsa-miR-142-5p	20.8205	156.124	2.90661	0	**
Q5N-Q5T	hsa-miR-143-3p	446489	309134	-0.530391	0
Q5N-Q5T	hsa-miR-143-5p	33.0729	23.2536	-0.508195	8.47085e-15
Q5N-Q5T	hsa-miR-144-3p	0.7311	2.5713	1.81436	9.76314e-10	**
Q5N-Q5T	hsa-miR-144-5p	0.8188	12.2696	3.90543	2.33396e-92	**
Q5N-Q5T	hsa-miR-145-3p	283.649	564.068	0.991761	0
Q5N-Q5T	hsa-miR-145-5p	3224.83	1142.81	-1.49664	0	**
Q5N-Q5T	hsa-miR-1468	15.1182	22.9462	0.601969	5.48149e-14
Q5N-Q5T	hsa-miR-146a-5p	22.2533	353.416	3.98928	0	**
Q5N-Q5T	hsa-miR-146b-3p	5.4391	14.841	1.44815	3.89268e-36	**
Q5N-Q5T	hsa-miR-146b-5p	252.653	2286.63	3.17799	0	**
Q5N-Q5T	hsa-miR-148a-3p	441.733	12439.4	4.8156	0	**
Q5N-Q5T	hsa-miR-148a-5p	11.8139	128.482	3.44301	0	**
Q5N-Q5T	hsa-miR-148b-3p	6.3748	77.0836	3.59597	0	**
Q5N-Q5T	hsa-miR-148b-5p	1.3744	7.4624	2.44084	1.37256e-36	**
Q5N-Q5T	hsa-miR-149-5p	2.3686	39.8554	4.07267	1.45753e-305	**
Q5N-Q5T	hsa-miR-150-5p	15.6738	52.2927	1.73825	1.44546e-159	**
Q5N-Q5T	hsa-miR-151a-3p	661.079	1115.25	0.754476	0
Q5N-Q5T	hsa-miR-151a-5p	318.652	722.344	1.1807	0	**
Q5N-Q5T	hsa-miR-151b	18.2471	38.2623	1.06826	7.36058e-57	**
Q5N-Q5T	hsa-miR-152	3.9769	51.063	3.68256	0	**
Q5N-Q5T	hsa-miR-153	0.01	3.5216	8.46009	2.0111e-37	**
Q5N-Q5T	hsa-miR-155-5p	4.9712	40.2746	3.0182	6.15808e-239	**
Q5N-Q5T	hsa-miR-15a-5p	6.4333	80.2977	3.64173	0	**
Q5N-Q5T	hsa-miR-15b-5p	1.5791	19.8159	3.64948	1.57978e-140	**
Q5N-Q5T	hsa-miR-16-2-3p	1.8423	6.596	1.84008	3.32365e-23	**
Q5N-Q5T	hsa-miR-16-5p	108.518	1264.86	3.54298	0	**
Q5N-Q5T	hsa-miR-17-3p	0.5848	4.416	2.91672	1.03402e-26	**
Q5N-Q5T	hsa-miR-17-5p	1.696	10.956	2.69151	5.70062e-59	**
Q5N-Q5T	hsa-miR-181a-2-3p	10.2933	46.5911	2.17835	1.59254e-191	**
Q5N-Q5T	hsa-miR-181a-3p	7.486	11.0958	0.567747	7.10318e-07
Q5N-Q5T	hsa-miR-181a-5p	1012.92	5376.7	2.4082	0	**
Q5N-Q5T	hsa-miR-181b-5p	57.344	244.974	2.09491	0	**
Q5N-Q5T	hsa-miR-181c-3p	2.6903	23.9803	3.15601	2.64334e-149	**
Q5N-Q5T	hsa-miR-181c-5p	91.2065	444.279	2.28426	0	**
Q5N-Q5T	hsa-miR-181d	25.9671	68.056	1.39004	6.00817e-150	**
Q5N-Q5T	hsa-miR-182-5p	244.055	3275.83	3.74658	0	**
Q5N-Q5T	hsa-miR-183-5p	24.6512	839.255	5.08938	0	**
Q5N-Q5T	hsa-miR-184	0.2924	10.7883	5.20538	6.93517e-97	**
Q5N-Q5T	hsa-miR-185-5p	0.848	2.0962	1.30564	1.46117e-05	**
Q5N-Q5T	hsa-miR-186-5p	149.808	1202.23	3.00453	0	**
Q5N-Q5T	hsa-miR-187-3p	5.2344	7.0432	0.428207	0.00228109
Q5N-Q5T	hsa-miR-190a	0.7311	1.3695	0.905509	0.0093779
Q5N-Q5T	hsa-miR-190b	0.3509	2.5993	2.88899	3.87855e-16	**
Q5N-Q5T	hsa-miR-191-5p	3096.78	8457.42	1.44945	0	**
Q5N-Q5T	hsa-miR-192-5p	86.5277	405.877	2.22981	0	**
Q5N-Q5T	hsa-miR-193a-3p	0.4971	1.4254	1.51976	6.48234e-05	**
Q5N-Q5T	hsa-miR-193a-5p	0.01	2.6272	8.03738	4.22341e-28	**
Q5N-Q5T	hsa-miR-193b-3p	8.6849	24.9306	1.52134	6.16999e-64	**
Q5N-Q5T	hsa-miR-193b-5p	1.3451	0.6149	-1.12929	0.00191725	**
Q5N-Q5T	hsa-miR-194-5p	0.01	7.4624	9.5435	1.68797e-78	**
Q5N-Q5T	hsa-miR-195-3p	21.2883	9.0276	-1.23765	8.63964e-41	**
Q5N-Q5T	hsa-miR-195-5p	17.984	136.475	2.92385	0	**
Q5N-Q5T	hsa-miR-196a-5p	8.2171	5.7016	-0.527262	6.40305e-05
Q5N-Q5T	hsa-miR-196b-5p	28.7451	177.84	2.62919	0	**
Q5N-Q5T	hsa-miR-197-3p	4.2694	8.4686	0.98809	2.49493e-12
Q5N-Q5T	hsa-miR-199a-3p	185.366	1606.12	3.11513	0	**
Q5N-Q5T	hsa-miR-199a-5p	48.5421	351.711	2.85708	0	**
Q5N-Q5T	hsa-miR-199b-3p	185.366	1605.12	3.11423	0	**
Q5N-Q5T	hsa-miR-199b-5p	27.1953	307.719	3.50019	0	**
Q5N-Q5T	hsa-miR-19a-3p	2.3686	5.8973	1.31602	2.03568e-13	**
Q5N-Q5T	hsa-miR-19b-3p	10.5564	59.9787	2.50633	6.76059e-291	**
Q5N-Q5T	hsa-miR-200a-3p	1.4621	34.1258	4.54475	1.24959e-281	**
Q5N-Q5T	hsa-miR-200a-5p	0.01	1.5651	7.29011	4.96375e-17	**
Q5N-Q5T	hsa-miR-200b-3p	0.965	94.6356	6.61571	0	**
Q5N-Q5T	hsa-miR-200b-5p	0.01	1.1739	6.87517	5.94682e-13	**
Q5N-Q5T	hsa-miR-200c-3p	0.4386	145.615	8.37503	0	**
Q5N-Q5T	hsa-miR-203a	1.9592	51.3425	4.71182	0	**
Q5N-Q5T	hsa-miR-204-5p	313.213	242.766	-0.367581	4.19763e-70
Q5N-Q5T	hsa-miR-205-5p	34.0672	726.061	4.41364	0	**
Q5N-Q5T	hsa-miR-206	0.01	1.0621	6.73078	8.70089e-12	**
Q5N-Q5T	hsa-miR-208b	0.01	5.0867	8.99059	9.7619e-54	**
Q5N-Q5T	hsa-miR-20a-5p	0.3509	11.7666	5.06749	3.53626e-104	**
Q5N-Q5T	hsa-miR-20b-5p	0.3801	4.2203	3.47289	6.92384e-30	**
Q5N-Q5T	hsa-miR-210	4.708	9.335	0.987536	1.97122e-13
Q5N-Q5T	hsa-miR-212-3p	0.965	2.3757	1.29975	4.18367e-06	**
Q5N-Q5T	hsa-miR-212-5p	4.1232	9.5865	1.21724	1.12378e-18	**
Q5N-Q5T	hsa-miR-21-3p	40.2373	126.721	1.65505	0	**
Q5N-Q5T	hsa-miR-214-3p	8.1293	16.1546	0.990742	2.96865e-22
Q5N-Q5T	hsa-miR-214-5p	1.7545	9.8381	2.48732	9.35333e-49	**
Q5N-Q5T	hsa-miR-21-5p	1118.28	3603.08	1.68795	0	**
Q5N-Q5T	hsa-miR-218-1-3p	0.8188	7.7698	3.24629	9.28846e-51	**
Q5N-Q5T	hsa-miR-218-5p	2.7488	29.8776	3.44219	7.71207e-201	**
Q5N-Q5T	hsa-miR-221-3p	616.543	695.625	0.174108	3.91039e-38
Q5N-Q5T	hsa-miR-221-5p	37.7225	58.8328	0.641195	3.42406e-37
Q5N-Q5T	hsa-miR-222-3p	679.706	472.563	-0.524404	4.39366e-287
Q5N-Q5T	hsa-miR-223-3p	1.9592	8.5804	2.13078	1.05273e-35	**
Q5N-Q5T	hsa-miR-223-5p	1.0235	0.7546	-0.439727	0.234871
Q5N-Q5T	hsa-miR-22-3p	1671.02	5465.08	1.70952	0	**
Q5N-Q5T	hsa-miR-224-5p	4.2986	11.8225	1.4596	1.93169e-29	**
Q5N-Q5T	hsa-miR-22-5p	0.01	3.1023	8.27719	4.71226e-33	**
Q5N-Q5T	hsa-miR-23a-3p	70.4445	191.954	1.4462	0	**
Q5N-Q5T	hsa-miR-23b-3p	189.548	427.481	1.1733	0	**
Q5N-Q5T	hsa-miR-23b-5p	1.7253	0.8944	-0.947855	0.00229467
Q5N-Q5T	hsa-miR-24-2-5p	0.01	2.3757	7.89221	1.76824e-25	**
Q5N-Q5T	hsa-miR-24-3p	74.9186	143.491	0.93756	4.02843e-168
Q5N-Q5T	hsa-miR-25-3p	400.267	588.188	0.555314	6.30038e-275
Q5N-Q5T	hsa-miR-26a-5p	3385.31	20799.1	2.61916	0	**
Q5N-Q5T	hsa-miR-26b-3p	2.3101	12.3814	2.42215	3.89914e-59	**
Q5N-Q5T	hsa-miR-26b-5p	164.897	1752.1	3.40945	0	**
Q5N-Q5T	hsa-miR-27a-3p	56.8469	238.657	2.06979	0	**
Q5N-Q5T	hsa-miR-27a-5p	7.9539	12.2696	0.625354	1.2961e-08
Q5N-Q5T	hsa-miR-27b-3p	6302.05	21708.3	1.78435	0	**
Q5N-Q5T	hsa-miR-27b-5p	57.7826	52.0691	-0.150208	0.00125971
Q5N-Q5T	hsa-miR-28-3p	3251.32	1020.81	-1.67131	0	**
Q5N-Q5T	hsa-miR-28-5p	53.8349	169.791	1.65714	0	**
Q5N-Q5T	hsa-miR-299-3p	0.01	1.8446	7.52716	6.06197e-20	**
Q5N-Q5T	hsa-miR-29a-3p	67.8127	448.918	2.72682	0	**
Q5N-Q5T	hsa-miR-29b-3p	2.7195	14.254	2.38995	8.61619e-67	**
Q5N-Q5T	hsa-miR-29c-3p	16.4049	126.414	2.94595	0	**
Q5N-Q5T	hsa-miR-29c-5p	1.1112	3.4657	1.64103	3.46631e-11	**
Q5N-Q5T	hsa-miR-301a-3p	5.5853	16.5738	1.5692	5.33591e-45	**
Q5N-Q5T	hsa-miR-301b	0.01	1.09	6.76818	4.44881e-12	**
Q5N-Q5T	hsa-miR-30a-3p	397.255	297.183	-0.418718	3.46702e-112
Q5N-Q5T	hsa-miR-30a-5p	2422.25	8957.99	1.88683	0	**
Q5N-Q5T	hsa-miR-30b-5p	10.7904	130.438	3.59555	0	**
Q5N-Q5T	hsa-miR-30c-1-3p	5.9362	8.7201	0.554805	1.67731e-05
Q5N-Q5T	hsa-miR-30c-2-3p	43.3662	18.9495	-1.19441	6.45388e-77	**
Q5N-Q5T	hsa-miR-30c-5p	58.8353	268.898	2.19231	0	**
Q5N-Q5T	hsa-miR-30d-3p	1.1112	21.0177	4.24141	1.45952e-166	**
Q5N-Q5T	hsa-miR-30d-5p	497.352	2233.49	2.16696	0	**
Q5N-Q5T	hsa-miR-30e-3p	180.337	120.684	-0.579457	1.25467e-92
Q5N-Q5T	hsa-miR-30e-5p	71.7604	756.023	3.39717	0	**
Q5N-Q5T	hsa-miR-31-5p	0.3801	22.2195	5.8693	2.20041e-208	**
Q5N-Q5T	hsa-miR-320a	230.136	160.931	-0.516047	9.37888e-96
Q5N-Q5T	hsa-miR-320b	26.8444	19.8159	-0.437963	1.07208e-09
Q5N-Q5T	hsa-miR-324-3p	0.3217	1.9005	2.56259	7.51634e-11	**
Q5N-Q5T	hsa-miR-324-5p	0.01	3.1862	8.31569	6.29898e-34	**
Q5N-Q5T	hsa-miR-32-5p	0.0292	2.3198	6.31189	2.84413e-23	**
Q5N-Q5T	hsa-miR-328	21.1421	28.9552	0.453704	6.38689e-11
Q5N-Q5T	hsa-miR-330-3p	1.3159	0.9223	-0.512742	0.120527
Q5N-Q5T	hsa-miR-330-5p	0.01	2.5154	7.97464	6.17934e-27	**
Q5N-Q5T	hsa-miR-335-3p	0.7895	10.7324	3.76489	9.26682e-79	**
Q5N-Q5T	hsa-miR-335-5p	0.4971	9.0834	4.19162	2.77057e-72	**
Q5N-Q5T	hsa-miR-338-3p	3.1874	16.0428	2.33147	7.9852e-73	**
Q5N-Q5T	hsa-miR-338-5p	0.3509	1.7887	2.34978	1.94269e-09	**
Q5N-Q5T	hsa-miR-339-3p	0.9358	7.5183	3.00613	8.94321e-46	**
Q5N-Q5T	hsa-miR-339-5p	0.3801	3.5216	3.21178	1.46247e-23	**
Q5N-Q5T	hsa-miR-340-3p	0.4386	3.1862	2.86086	2.66225e-19	**
Q5N-Q5T	hsa-miR-340-5p	38.629	49.1065	0.34623	3.64086e-11
Q5N-Q5T	hsa-miR-342-3p	66.3798	180.579	1.44381	0	**
Q5N-Q5T	hsa-miR-342-5p	0.01	3.1862	8.31569	6.29898e-34	**
Q5N-Q5T	hsa-miR-345-5p	8.1878	58.6372	2.84027	0	**
Q5N-Q5T	hsa-miR-34a-5p	9.6792	49.3581	2.35033	2.00105e-222	**
Q5N-Q5T	hsa-miR-34c-5p	0.3509	9.1393	4.70295	4.42196e-78	**
Q5N-Q5T	hsa-miR-3605-3p	2.1639	1.6769	-0.367837	0.142021
Q5N-Q5T	hsa-miR-3605-5p	2.5148	2.6831	0.0934572	0.665128
Q5N-Q5T	hsa-miR-3607-3p	2.895	5.7296	0.984871	9.41973e-09
Q5N-Q5T	hsa-miR-361-3p	6.6087	14.7292	1.15624	8.35764e-26	**
Q5N-Q5T	hsa-miR-3615	2.7488	1.6769	-0.713005	0.00251478
Q5N-Q5T	hsa-miR-361-5p	24.6804	67.0778	1.44247	3.38272e-156	**
Q5N-Q5T	hsa-miR-362-5p	0.01	3.7172	8.53807	1.83737e-39	**
Q5N-Q5T	hsa-miR-363-3p	6.0239	164.089	4.76764	0	**
Q5N-Q5T	hsa-miR-3651	1.9007	5.506	1.53447	1.6266e-15	**
Q5N-Q5T	hsa-miR-3653	0.2047	1.4534	2.82785	2.15216e-09	**
Q5N-Q5T	hsa-miR-365a-3p	3.0997	11.9622	1.94828	6.17083e-44	**
Q5N-Q5T	hsa-miR-365b-3p	3.0997	11.9622	1.94828	6.17083e-44	**
Q5N-Q5T	hsa-miR-3687	0.01	2.6831	8.06776	1.10414e-28	**
Q5N-Q5T	hsa-miR-369-5p	0.5556	2.4875	2.16258	1.51874e-11	**
Q5N-Q5T	hsa-miR-370	0.2339	1.0062	2.10495	2.96165e-05	**
Q5N-Q5T	hsa-miR-374a-3p	4.5325	10.2294	1.17434	8.12126e-19	**
Q5N-Q5T	hsa-miR-374a-5p	0.9065	21.7723	4.58604	2.90199e-181	**
Q5N-Q5T	hsa-miR-374b-3p	0.2632	1.3975	2.40862	7.92627e-08	**
Q5N-Q5T	hsa-miR-374b-5p	3.3629	35.4394	3.39758	3.52597e-235	**
Q5N-Q5T	hsa-miR-375	248.617	6251.59	4.65223	0	**
Q5N-Q5T	hsa-miR-376c-3p	0.01	1.8726	7.5489	3.09952e-20	**
Q5N-Q5T	hsa-miR-378a-3p	615.11	441.707	-0.477754	1.25914e-219
Q5N-Q5T	hsa-miR-378a-5p	0.3801	1.7049	2.16524	2.52322e-08	**
Q5N-Q5T	hsa-miR-378c	12.2525	9.1673	-0.418507	7.84459e-05
Q5N-Q5T	hsa-miR-378d	6.0239	1.3695	-2.13705	7.11488e-26	**
Q5N-Q5T	hsa-miR-379-5p	0.0292	1.3136	5.49141	5.08272e-13	**
Q5N-Q5T	hsa-miR-381-3p	15.8785	79.1518	2.31755	0	**
Q5N-Q5T	hsa-miR-382-5p	0.4094	2.739	2.74207	4.10039e-16	**
Q5N-Q5T	hsa-miR-3909	1.4036	1.3695	-0.0354826	0.901711
Q5N-Q5T	hsa-miR-3913-5p	0.8773	1.3136	0.582384	0.0834474
Q5N-Q5T	hsa-miR-409-3p	42.255	59.7272	0.499266	1.20996e-24
Q5N-Q5T	hsa-miR-409-5p	5.0589	15.8751	1.64987	2.79919e-46	**
Q5N-Q5T	hsa-miR-410	9.3283	19.2849	1.04779	1.24084e-28	**
Q5N-Q5T	hsa-miR-411-5p	11.3752	89.8283	2.98128	0	**
Q5N-Q5T	hsa-miR-421	10.3517	20.1792	0.963001	3.2394e-26
Q5N-Q5T	hsa-miR-423-3p	75.7958	215.907	1.51022	0	**
Q5N-Q5T	hsa-miR-423-5p	201.742	170.769	-0.240466	2.13343e-21
Q5N-Q5T	hsa-miR-424-3p	0.5556	1.5093	1.44176	7.64421e-05	**
Q5N-Q5T	hsa-miR-424-5p	0.01	9.6145	9.90907	6.24815e-101	**
Q5N-Q5T	hsa-miR-425-3p	0.5848	1.7049	1.54367	9.59434e-06	**
Q5N-Q5T	hsa-miR-425-5p	0.4386	20.7103	5.5613	3.13317e-190	**
Q5N-Q5T	hsa-miR-429	0.01	27.8093	11.4414	1.40172e-290	**
Q5N-Q5T	hsa-miR-431-3p	1.3159	1.4534	0.143382	0.62946
Q5N-Q5T	hsa-miR-432-5p	5.0881	11.9063	1.22653	4.45366e-23	**
Q5N-Q5T	hsa-miR-4449	3.3044	9.7822	1.56577	3.83596e-27	**
Q5N-Q5T	hsa-miR-4454	0.7018	4.6116	2.71614	6.13436e-26	**
Q5N-Q5T	hsa-miR-4485	1.4036	18.5302	3.72267	1.24132e-133	**
Q5N-Q5T	hsa-miR-450a-5p	0.4679	2.5713	2.45823	1.23686e-13	**
Q5N-Q5T	hsa-miR-450b-5p	0.01	3.4657	8.437	7.69261e-37	**
Q5N-Q5T	hsa-miR-451a	36.1726	437.683	3.59692	0	**
Q5N-Q5T	hsa-miR-452-5p	0.4094	3.7731	3.20417	4.26417e-25	**
Q5N-Q5T	hsa-miR-454-3p	1.8715	11.3194	2.59653	1.4433e-58	**
Q5N-Q5T	hsa-miR-454-5p	2.047	1.3136	-0.639985	0.0178814
Q5N-Q5T	hsa-miR-455-3p	0.01	1.4813	7.21072	3.71338e-16	**
Q5N-Q5T	hsa-miR-455-5p	1.1697	13.0243	3.477	2.87936e-89	**
Q5N-Q5T	hsa-miR-4677-3p	1.082	1.3136	0.279826	0.381025
Q5N-Q5T	hsa-miR-4732-3p	1.3159	0.0838	-3.97296	2.59965e-11	**
Q5N-Q5T	hsa-miR-4770	3.9477	1.0062	-1.9721	6.95028e-16	**
Q5N-Q5T	hsa-miR-4786-5p	1.4329	0.7546	-0.925154	0.00653413
Q5N-Q5T	hsa-miR-484	6.3163	36.8928	2.54619	6.46708e-183	**
Q5N-Q5T	hsa-miR-485-5p	0.9942	1.3695	0.462041	0.15211
Q5N-Q5T	hsa-miR-486-3p	2.8073	2.2359	-0.328328	0.132579
Q5N-Q5T	hsa-miR-486-5p	20527.3	3936.07	-2.38272	0	**
Q5N-Q5T	hsa-miR-487b	0.7603	3.298	2.11695	1.63231e-14	**
Q5N-Q5T	hsa-miR-490-3p	1.6376	2.9067	0.827799	0.000423765
Q5N-Q5T	hsa-miR-493-3p	0.4094	4.2762	3.38475	1.25659e-29	**
Q5N-Q5T	hsa-miR-493-5p	2.8365	23.617	3.05764	1.14722e-142	**
Q5N-Q5T	hsa-miR-497-5p	8.3633	57.2677	2.77558	5.83905436506281e-311	**
Q5N-Q5T	hsa-miR-499a-5p	0.01	5.478	9.09751	8.14816e-58	**
Q5N-Q5T	hsa-miR-500a-3p	44.9745	181.809	2.01524	0	**
Q5N-Q5T	hsa-miR-501-3p	111.822	168.756	0.593736	2.53097e-90
Q5N-Q5T	hsa-miR-502-3p	2.8073	14.282	2.34694	1.5963e-65	**
Q5N-Q5T	hsa-miR-504	2.4856	4.4719	0.847294	7.95187e-06
Q5N-Q5T	hsa-miR-505-3p	0.2924	4.2762	3.87031	6.69013e-33	**
Q5N-Q5T	hsa-miR-532-3p	0.5556	1.649	1.56947	1.05924e-05	**
Q5N-Q5T	hsa-miR-532-5p	54.0396	161.825	1.58235	0	**
Q5N-Q5T	hsa-miR-539-3p	0.01	1.2298	6.94228	1.5547e-13	**
Q5N-Q5T	hsa-miR-542-3p	0.3509	2.4316	2.79277	1.04641e-14	**
Q5N-Q5T	hsa-miR-548k	0.5264	3.1582	2.58487	2.55074e-17	**
Q5N-Q5T	hsa-miR-548o-3p	0.01	1.1739	6.87517	5.94682e-13	**
Q5N-Q5T	hsa-miR-550a-5p	0.117	1.0341	3.1438	1.21258e-07	**
Q5N-Q5T	hsa-miR-561-5p	0.01	2.1241	7.73071	7.40316e-23	**
Q5N-Q5T	hsa-miR-5683	0.4971	1.4254	1.51976	6.48234e-05	**
Q5N-Q5T	hsa-miR-574-3p	11.4922	87.5365	2.92923	0	**
Q5N-Q5T	hsa-miR-574-5p	1.6083	7.4904	2.21951	6.31307e-33	**
Q5N-Q5T	hsa-miR-576-5p	1.082	0.8944	-0.274708	0.431303
Q5N-Q5T	hsa-miR-582-3p	10.1178	12.6889	0.326671	0.0014609
Q5N-Q5T	hsa-miR-582-5p	0.01	2.5434	7.99061	3.15953e-27	**
Q5N-Q5T	hsa-miR-584-5p	0.8188	2.8788	1.81388	9.72184e-11	**
Q5N-Q5T	hsa-miR-589-5p	4.4156	11.3753	1.36522	8.04748e-26	**
Q5N-Q5T	hsa-miR-598	3.3044	4.7234	0.515437	0.00308121
Q5N-Q5T	hsa-miR-628-3p	1.8423	3.0464	0.725597	0.00127832
Q5N-Q5T	hsa-miR-628-5p	1.082	1.7608	0.702531	0.0176399
Q5N-Q5T	hsa-miR-629-5p	2.0177	8.5804	2.08833	7.6621e-35	**
Q5N-Q5T	hsa-miR-6510-3p	0.2047	1.2298	2.58684	1.63796e-07	**
Q5N-Q5T	hsa-miR-6511a-3p	1.4621	0.8105	-0.851158	0.0104377
Q5N-Q5T	hsa-miR-652-3p	0.3801	4.4998	3.56541	1.85843e-32	**
Q5N-Q5T	hsa-miR-654-3p	5.5853	31.8619	2.51213	7.72771e-156	**
Q5N-Q5T	hsa-miR-654-5p	0.2924	1.2857	2.13654	1.7291e-06	**
Q5N-Q5T	hsa-miR-660-5p	7.0474	61.0967	3.11593	0	**
Q5N-Q5T	hsa-miR-664a-3p	3.4506	14.1143	2.03224	2.20579e-54	**
Q5N-Q5T	hsa-miR-664a-5p	0.8773	2.4316	1.47076	3.1505e-07	**
Q5N-Q5T	hsa-miR-671-3p	9.5037	31.1912	1.71458	3.82009e-94	**
Q5N-Q5T	hsa-miR-708-5p	0.01	2.5713	8.00635	1.61548e-27	**
Q5N-Q5T	hsa-miR-7-1-3p	0.01	1.4813	7.21072	3.71338e-16	**
Q5N-Q5T	hsa-miR-744-3p	0.01	1.2298	6.94228	1.5547e-13	**
Q5N-Q5T	hsa-miR-744-5p	24.6804	44.2993	0.843918	8.07791e-45
Q5N-Q5T	hsa-miR-769-5p	48.0157	94.3002	0.973755	2.79203e-118
Q5N-Q5T	hsa-miR-873-3p	10.1178	5.6178	-0.848818	1.40933e-11
Q5N-Q5T	hsa-miR-873-5p	0.7895	3.7172	2.23521	3.25597e-17	**
Q5N-Q5T	hsa-miR-874	6.2871	11.4312	0.86251	3.78768e-13
Q5N-Q5T	hsa-miR-877-5p	1.8423	0.4192	-2.1358	7.36115e-09	**
Q5N-Q5T	hsa-miR-887	4.0939	9.0555	1.14532	3.12327e-16	**
Q5N-Q5T	hsa-miR-889	1.696	7.7698	2.19574	1.15048e-33	**
Q5N-Q5T	hsa-miR-891a	0.5848	1.1739	1.00529	0.00881514	**
Q5N-Q5T	hsa-miR-92a-1-5p	0.01	1.1739	6.87517	5.94682e-13	**
Q5N-Q5T	hsa-miR-92a-3p	852.264	2530.37	1.56998	0	**
Q5N-Q5T	hsa-miR-92b-3p	536.858	299.307	-0.842915	0
Q5N-Q5T	hsa-miR-93-5p	34.769	147.04	2.08034	0	**
Q5N-Q5T	hsa-miR-941	58.9523	118.979	1.01309	1.18804e-158	**
Q5N-Q5T	hsa-miR-95	0.4094	1.3695	1.74207	1.59548e-05	**
Q5N-Q5T	hsa-miR-9-5p	11.4922	6.9314	-0.729436	2.65484e-10
Q5N-Q5T	hsa-miR-96-5p	0.01	36.6971	11.8415	0	**
Q5N-Q5T	hsa-miR-98-5p	150.51	172.753	0.198856	2.54749e-13
Q5N-Q5T	hsa-miR-99a-3p	5.7315	22.4152	1.96749	7.0703e-82	**
Q5N-Q5T	hsa-miR-99a-5p	1553.23	7965.54	2.3585	0	**
Q5N-Q5T	hsa-miR-99b-3p	10.0301	4.2483	-1.23938	4.13441e-20	**
Q5N-Q5T	hsa-miR-99b-5p	24640.6	17219.4	-0.517003	0

## Sheet: S1N-S1T
pairwise	miR-name	S1N-std	S1T-std	fold-change(log2 S1T/S1N)	p-value	sig-lable
S1N-S1T	hsa-let-7a-3p	3.2444	0.01	-8.34181	4.64789e-38	**
S1N-S1T	hsa-let-7a-5p	17867.9	5430.46	-1.71822	0	**
S1N-S1T	hsa-let-7b-5p	901.566	351.649	-1.3583	0	**
S1N-S1T	hsa-let-7c	4832.36	1456.53	-1.73019	0	**
S1N-S1T	hsa-let-7d-3p	19.8407	14.9348	-0.409785	5.20779e-07
S1N-S1T	hsa-let-7d-5p	135.235	50.5448	-1.41983	4.44659081257122e-322	**
S1N-S1T	hsa-let-7e-5p	863.319	291.277	-1.5675	0	**
S1N-S1T	hsa-let-7f-5p	7951.75	3475.94	-1.19387	0	**
S1N-S1T	hsa-let-7g-5p	875.517	187.658	-2.22203	0	**
S1N-S1T	hsa-let-7i-5p	2336.68	607.462	-1.94359	0	**
S1N-S1T	hsa-miR-100-5p	7470.98	1906.16	-1.97063	0	**
S1N-S1T	hsa-miR-101-3p	366.304	127.262	-1.52524	0	**
S1N-S1T	hsa-miR-103a-3p	620.084	229.3	-1.43522	0	**
S1N-S1T	hsa-miR-106b-3p	25.0816	17.8537	-0.490406	2.71111e-11
S1N-S1T	hsa-miR-106b-5p	2.0901	0.01	-7.70743	8.48558e-25	**
S1N-S1T	hsa-miR-107	132.583	33.8344	-1.97034	0	**
S1N-S1T	hsa-miR-10a-5p	5976.54	2148.96	-1.47567	0	**
S1N-S1T	hsa-miR-10b-5p	185301	80309.5	-1.20623	0	**
S1N-S1T	hsa-miR-1180	2.8388	0.01	-8.14914	2.12166e-33	**
S1N-S1T	hsa-miR-1247-3p	2.6205	1.7513	-0.581416	0.0118169
S1N-S1T	hsa-miR-1247-5p	8.4229	15.4699	0.877075	5.00851e-18
S1N-S1T	hsa-miR-1248	2.3085	5.3999	1.22598	2.1248e-11	**
S1N-S1T	hsa-miR-1255a	0.01	5.4242	9.08327	1.67083e-56	**
S1N-S1T	hsa-miR-125a-5p	3602.64	2992.12	-0.267889	0
S1N-S1T	hsa-miR-125b-1-3p	22.1492	9.1214	-1.27993	1.55097e-46	**
S1N-S1T	hsa-miR-125b-2-3p	226.015	103.279	-1.12988	0	**
S1N-S1T	hsa-miR-125b-5p	1015.99	766.905	-0.405771	4.4028e-277
S1N-S1T	hsa-miR-1262	0.01	2.3108	7.85225	1.85165e-24	**
S1N-S1T	hsa-miR-126-3p	16.4403	6.8593	-1.2611	3.24495e-34	**
S1N-S1T	hsa-miR-126-5p	99.7026	40.0856	-1.31455	1.63677e-211	**
S1N-S1T	hsa-miR-1269a	1.4662	1.7513	0.256344	0.350903
S1N-S1T	hsa-miR-1271-5p	8.267	2.5783	-1.68094	6.11881e-27	**
S1N-S1T	hsa-miR-127-3p	285.413	254.451	-0.16566	1.14316e-15
S1N-S1T	hsa-miR-1275	0.312	2.7972	3.16437	1.02551e-18	**
S1N-S1T	hsa-miR-127-5p	0.8423	2.1891	1.37793	3.49185e-06	**
S1N-S1T	hsa-miR-128	7.643	4.0377	-0.920605	1.3251e-10
S1N-S1T	hsa-miR-1291	0.3744	1.7513	2.22577	8.7561e-09	**
S1N-S1T	hsa-miR-1296	2.5581	4.3783	0.775298	3.63129e-05
S1N-S1T	hsa-miR-1307-3p	3.5875	3.5513	-0.0146316	0.927033
S1N-S1T	hsa-miR-1307-5p	1.0607	0.01	-6.72887	5.70741e-13	**
S1N-S1T	hsa-miR-130a-3p	160.036	27.4616	-2.54291	0	**
S1N-S1T	hsa-miR-130b-3p	1.9654	2.9432	0.582563	0.00864239
S1N-S1T	hsa-miR-130b-5p	1.6846	4.3053	1.35371	1.13171e-10	**
S1N-S1T	hsa-miR-132-3p	3.7435	1.9216	-0.96208	3.08284e-06
S1N-S1T	hsa-miR-133a	113.21	34.9046	-1.69752	0	**
S1N-S1T	hsa-miR-134	1.4038	0.01	-7.13319	6.51408e-17	**
S1N-S1T	hsa-miR-135a-5p	4.2739	0.01	-8.73941	6.91033e-50	**
S1N-S1T	hsa-miR-136-3p	1.8406	2.2864	0.312902	0.194613
S1N-S1T	hsa-miR-139-3p	0.156	1.2162	2.96276	2.39134e-08	**
S1N-S1T	hsa-miR-139-5p	0.9983	1.9459	0.962892	0.00101006
S1N-S1T	hsa-miR-140-3p	75.4008	70.539	-0.0961587	0.0155468
S1N-S1T	hsa-miR-140-5p	1.1543	0.01	-6.85087	4.79941e-14	**
S1N-S1T	hsa-miR-141-3p	144.469	171.385	0.246485	1.10957e-19
S1N-S1T	hsa-miR-141-5p	1.903	4.4756	1.23381	9.1856e-10	**
S1N-S1T	hsa-miR-142-3p	0.9983	1.8243	0.869798	0.00348591
S1N-S1T	hsa-miR-142-5p	48.2291	9.8025	-2.29868	7.49058e-226	**
S1N-S1T	hsa-miR-143-3p	221291	49912	-2.14849	0	**
S1N-S1T	hsa-miR-143-5p	6.1456	5.6918	-0.110669	0.424075
S1N-S1T	hsa-miR-145-3p	124.753	37.6046	-1.73009	0	**
S1N-S1T	hsa-miR-145-5p	3141.29	470.933	-2.73776	0	**
S1N-S1T	hsa-miR-1468	10.8874	13.2078	0.278731	0.00470919
S1N-S1T	hsa-miR-146a-5p	247.915	19.0942	-3.69864	0	**
S1N-S1T	hsa-miR-146b-3p	20.9325	6.2026	-1.7548	1.11685e-69	**
S1N-S1T	hsa-miR-146b-5p	1259.38	355.76	-1.82374	0	**
S1N-S1T	hsa-miR-148a-3p	3212.23	8554.92	1.41318	0	**
S1N-S1T	hsa-miR-148a-5p	68.6001	159.88	1.22071	7.22226e-291	**
S1N-S1T	hsa-miR-148b-3p	9.4836	2.9189	-1.70001	3.84328e-31	**
S1N-S1T	hsa-miR-148b-5p	1.2166	0.01	-6.92671	9.21201e-15	**
S1N-S1T	hsa-miR-149-5p	9.7332	4.0377	-1.26938	4.0543e-21	**
S1N-S1T	hsa-miR-150-5p	57.7127	16.6861	-1.79024	4.02354e-194	**
S1N-S1T	hsa-miR-151a-3p	897.604	415.718	-1.11047	0	**
S1N-S1T	hsa-miR-151a-5p	220.993	102.063	-1.11455	0	**
S1N-S1T	hsa-miR-151b	21.2445	10.289	-1.04599	9.39829e-33	**
S1N-S1T	hsa-miR-152	3.1508	4.4513	0.498509	0.00492466
S1N-S1T	hsa-miR-153	0.01	2.2621	7.82152	5.86485e-24	**
S1N-S1T	hsa-miR-155-5p	53.8444	2.481	-4.4398	0	**
S1N-S1T	hsa-miR-15a-5p	4.5546	0.01	-8.83118	4.1091e-53	**
S1N-S1T	hsa-miR-15b-5p	3.1508	3.1378	-0.00596478	0.966455
S1N-S1T	hsa-miR-16-2-3p	2.9324	0.01	-8.19594	1.78412e-34	**
S1N-S1T	hsa-miR-16-5p	86.7562	62.4149	-0.475076	2.46234e-33
S1N-S1T	hsa-miR-17-5p	5.2409	8.6349	0.720365	4.89699e-08
S1N-S1T	hsa-miR-181a-2-3p	36.7177	21.8914	-0.746111	7.08124e-32
S1N-S1T	hsa-miR-181a-3p	9.9515	6.835	-0.541973	4.24872e-06
S1N-S1T	hsa-miR-181a-5p	3702.07	966.457	-1.93755	0	**
S1N-S1T	hsa-miR-181b-5p	226.608	97.4168	-1.21796	0	**
S1N-S1T	hsa-miR-181c-3p	1.0607	1.8729	0.820257	0.00484917
S1N-S1T	hsa-miR-181c-5p	90.5621	27.0724	-1.74208	5.06758e-292	**
S1N-S1T	hsa-miR-181d	21.2445	11.9916	-0.825065	1.77109e-22
S1N-S1T	hsa-miR-182-5p	2071.67	4608.58	1.15353	0	**
S1N-S1T	hsa-miR-183-5p	266.882	324.236	0.280842	2.15663e-45
S1N-S1T	hsa-miR-184	3.5875	2.0432	-0.812148	7.67599e-05
S1N-S1T	hsa-miR-186-5p	118.264	78.3226	-0.594513	1.55184e-66
S1N-S1T	hsa-miR-190a	0.4679	4.3053	3.20184	2.16815e-28	**
S1N-S1T	hsa-miR-191-5p	3837.61	5285.95	0.461954	0
S1N-S1T	hsa-miR-192-5p	193.852	104.957	-0.885156	5.17204e-215
S1N-S1T	hsa-miR-193b-3p	3.9931	0.0243	-7.36041	8.5397e-45	**
S1N-S1T	hsa-miR-194-5p	0.9983	2.2864	1.19553	2.12121e-05	**
S1N-S1T	hsa-miR-195-3p	13.851	5.6918	-1.28303	7.61748e-30	**
S1N-S1T	hsa-miR-195-5p	19.092	8.3674	-1.19012	3.9113e-36	**
S1N-S1T	hsa-miR-196a-5p	1.747	0.0243	-6.16778	2.45553e-19	**
S1N-S1T	hsa-miR-196b-5p	46.4821	25.4184	-0.870802	1.33841e-51
S1N-S1T	hsa-miR-197-3p	2.9636	8.6593	1.5469	4.52162e-24	**
S1N-S1T	hsa-miR-199a-3p	207.017	70.2471	-1.55924	0	**
S1N-S1T	hsa-miR-199a-5p	24.2081	9.6565	-1.32592	1.76483e-53	**
S1N-S1T	hsa-miR-199b-3p	206.83	70.2471	-1.55793	0	**
S1N-S1T	hsa-miR-199b-5p	11.7921	8.2458	-0.516089	1.68927e-06
S1N-S1T	hsa-miR-19a-3p	10.981	21.4049	0.962932	3.48266e-28
S1N-S1T	hsa-miR-19b-3p	94.6176	67.8877	-0.478958	1.01142e-36
S1N-S1T	hsa-miR-200a-3p	6.1456	0.01	-9.26341	2.16016e-71	**
S1N-S1T	hsa-miR-200b-3p	36.0626	0.0486	-9.53533	0	**
S1N-S1T	hsa-miR-200b-5p	3.0884	0.01	-8.27072	2.87966e-36	**
S1N-S1T	hsa-miR-200c-3p	45.5774	20.359	-1.16265	8.94044e-81	**
S1N-S1T	hsa-miR-203a	29.605	11.3835	-1.3789	5.86918e-69	**
S1N-S1T	hsa-miR-204-5p	175.915	92.3574	-0.929575	4.56813e-212
S1N-S1T	hsa-miR-205-5p	439.209	5.5458	-6.30737	0	**
S1N-S1T	hsa-miR-20a-5p	6.0208	5.5458	-0.11856	0.397535
S1N-S1T	hsa-miR-20b-5p	5.8649	1.9702	-1.57376	6.44048e-18	**
S1N-S1T	hsa-miR-210	2.4957	0.0243	-6.68234	8.64643e-28	**
S1N-S1T	hsa-miR-211-5p	23.553	0.01	-11.2017	2.177e-271	**
S1N-S1T	hsa-miR-212-5p	1.6846	1.7027	0.0154182	0.965073
S1N-S1T	hsa-miR-21-3p	21.806	5.9593	-1.87151	3.56203e-79	**
S1N-S1T	hsa-miR-214-3p	4.461	4.5972	0.0433883	0.793434
S1N-S1T	hsa-miR-215	1.1543	0.0243	-5.56992	1.07276e-12	**
S1N-S1T	hsa-miR-21-5p	4767.69	1093.35	-2.12453	0	**
S1N-S1T	hsa-miR-218-1-3p	0.9359	4.0134	2.1004	2.69589e-17	**
S1N-S1T	hsa-miR-218-5p	7.8926	0.01	-9.62436	1.8329e-91	**
S1N-S1T	hsa-miR-221-3p	524.218	40.6451	-3.68901	0	**
S1N-S1T	hsa-miR-221-5p	19.248	8.6349	-1.15646	7.54873e-35	**
S1N-S1T	hsa-miR-222-3p	289.905	60.7365	-2.25494	0	**
S1N-S1T	hsa-miR-223-3p	1.4038	0.01	-7.13319	6.51408e-17	**
S1N-S1T	hsa-miR-22-3p	672.15	371.181	-0.85666	0
S1N-S1T	hsa-miR-224-5p	1.3102	0.01	-7.03364	7.74647e-16	**
S1N-S1T	hsa-miR-23a-3p	36.3122	36.0235	-0.011516	0.836081
S1N-S1T	hsa-miR-23b-3p	79.1756	23.0103	-1.78278	5.32562e-264	**
S1N-S1T	hsa-miR-24-2-5p	1.4662	2.2378	0.609999	0.0173139
S1N-S1T	hsa-miR-24-3p	63.1096	19.1185	-1.72289	5.8152e-201	**
S1N-S1T	hsa-miR-25-3p	833.309	515.543	-0.692759	0
S1N-S1T	hsa-miR-25-5p	0.9983	1.9459	0.962892	0.00101006
S1N-S1T	hsa-miR-26a-5p	2395.2	716.214	-1.74168	0	**
S1N-S1T	hsa-miR-26b-3p	3.1196	0.01	-8.28522	1.26161e-36	**
S1N-S1T	hsa-miR-26b-5p	192.386	58.8879	-1.70796	0	**
S1N-S1T	hsa-miR-27a-3p	23.4594	12.843	-0.869184	8.27905e-27
S1N-S1T	hsa-miR-27a-5p	2.4333	0.3405	-2.83719	5.1911e-16	**
S1N-S1T	hsa-miR-27b-3p	1808.19	754.232	-1.26146	0	**
S1N-S1T	hsa-miR-27b-5p	16.9083	6.008	-1.49277	4.49077e-45	**
S1N-S1T	hsa-miR-28-3p	1248.09	807.89	-0.627492	0
S1N-S1T	hsa-miR-28-5p	34.7524	5.5215	-2.65398	1.94745e-193	**
S1N-S1T	hsa-miR-29a-3p	47.2932	9.8268	-2.26684	1.03378e-217	**
S1N-S1T	hsa-miR-29b-3p	1.0607	2.5783	1.2814	1.83943e-06	**
S1N-S1T	hsa-miR-29c-3p	19.9655	8.0998	-1.30155	3.39449e-43	**
S1N-S1T	hsa-miR-29c-5p	1.4974	2.0918	0.482285	0.0631375
S1N-S1T	hsa-miR-301a-3p	6.052	3.5999	-0.749455	1.67101e-06
S1N-S1T	hsa-miR-30a-3p	146.621	50.3016	-1.54342	0	**
S1N-S1T	hsa-miR-30a-5p	1602.67	384.9	-2.05792	0	**
S1N-S1T	hsa-miR-30b-5p	9.0157	16.4186	0.86482	1.2509e-18
S1N-S1T	hsa-miR-30c-1-3p	1.4974	0.01	-7.22632	5.47775e-18	**
S1N-S1T	hsa-miR-30c-2-3p	30.7281	4.8648	-2.65911	1.23866e-171	**
S1N-S1T	hsa-miR-30c-5p	34.6588	21.0158	-0.721747	1.43844e-28
S1N-S1T	hsa-miR-30d-3p	1.1231	0.01	-6.81134	1.09548e-13	**
S1N-S1T	hsa-miR-30d-5p	466.693	370.451	-0.333189	2.74597e-89
S1N-S1T	hsa-miR-30e-3p	101.169	42.518	-1.25062	1.4955e-198	**
S1N-S1T	hsa-miR-30e-5p	61.581	17.1483	-1.84442	9.98297e-216	**
S1N-S1T	hsa-miR-31-5p	7.7366	0.0243	-8.3146	1.60018e-87	**
S1N-S1T	hsa-miR-320a	448.63	136.408	-1.7176	0	**
S1N-S1T	hsa-miR-320b	21.2757	2.2621	-3.23347	2.9302e-146	**
S1N-S1T	hsa-miR-324-3p	0.7175	3.2107	2.16184	1.43176e-14	**
S1N-S1T	hsa-miR-328	15.598	6.8836	-1.18013	1.89302e-29	**
S1N-S1T	hsa-miR-335-3p	3.5875	0.01	-8.48684	5.30482e-42	**
S1N-S1T	hsa-miR-339-3p	3.2132	0.01	-8.32787	1.0609e-37	**
S1N-S1T	hsa-miR-339-5p	1.0607	1.5081	0.507715	0.0997231
S1N-S1T	hsa-miR-340-3p	0.4055	2.2378	2.46431	4.40635e-12	**
S1N-S1T	hsa-miR-340-5p	43.4249	24.0806	-0.850651	1.71349e-46
S1N-S1T	hsa-miR-342-3p	179.252	67.912	-1.40025	0	**
S1N-S1T	hsa-miR-342-5p	2.87	3.2107	0.161837	0.41495
S1N-S1T	hsa-miR-345-5p	6.8631	1.9459	-1.81842	4.09019e-25	**
S1N-S1T	hsa-miR-34a-5p	25.2064	5.7647	-2.12847	4.73132e-108	**
S1N-S1T	hsa-miR-34c-5p	1.8094	0.01	-7.49937	1.42703e-21	**
S1N-S1T	hsa-miR-3605-3p	2.5893	1.5081	-0.77983	0.00118022
S1N-S1T	hsa-miR-3605-5p	4.3986	0.0243	-7.49994	2.05674e-49	**
S1N-S1T	hsa-miR-3607-3p	27.3277	68.1309	1.31795	1.38795e-140	**
S1N-S1T	hsa-miR-3613-5p	1.9965	0.01	-7.64133	1.00909e-23	**
S1N-S1T	hsa-miR-361-3p	8.5477	3.2837	-1.38021	3.96384e-21	**
S1N-S1T	hsa-miR-3615	2.1525	5.2539	1.28738	6.86002e-12	**
S1N-S1T	hsa-miR-361-5p	15.0365	4.4999	-1.7405	5.48579e-50	**
S1N-S1T	hsa-miR-363-3p	50.9431	6.2269	-3.0323	0	**
S1N-S1T	hsa-miR-3651	5.3657	15.8591	1.56347	2.05365e-43	**
S1N-S1T	hsa-miR-3653	1.8094	1.727	-0.0672433	0.782197
S1N-S1T	hsa-miR-365a-3p	4.8042	1.3378	-1.84443	2.26987e-18	**
S1N-S1T	hsa-miR-365b-3p	4.8042	1.3378	-1.84443	2.26987e-18	**
S1N-S1T	hsa-miR-369-5p	0.6551	2.6999	2.04312	1.04663e-11	**
S1N-S1T	hsa-miR-374a-3p	10.6067	7.6863	-0.464615	3.73375e-05
S1N-S1T	hsa-miR-374a-5p	2.5893	2.0432	-0.341732	0.124598
S1N-S1T	hsa-miR-374b-3p	1.1231	0.01	-6.81134	1.09548e-13	**
S1N-S1T	hsa-miR-374b-5p	5.4905	0.01	-9.10079	7.26507e-64	**
S1N-S1T	hsa-miR-375	4622.07	7201.55	0.639768	0
S1N-S1T	hsa-miR-378a-3p	288.782	81.4117	-1.82667	0	**
S1N-S1T	hsa-miR-378a-5p	2.4957	0.01	-7.9633	1.85892e-29	**
S1N-S1T	hsa-miR-378c	4.929	2.1405	-1.20335	1.27235e-10	**
S1N-S1T	hsa-miR-378d	2.3085	0.01	-7.85081	2.62883e-27	**
S1N-S1T	hsa-miR-379-5p	1.0919	2.8702	1.39431	7.81005e-08	**
S1N-S1T	hsa-miR-381-3p	9.39	12.2105	0.378925	0.000284279
S1N-S1T	hsa-miR-3938	0.01	2.4567	7.94058	5.8273e-26	**
S1N-S1T	hsa-miR-3943	0.01	2.3351	7.86734	1.04043e-24	**
S1N-S1T	hsa-miR-409-3p	42.5514	50.5205	0.247662	7.48149e-07
S1N-S1T	hsa-miR-409-5p	1.4038	0.01	-7.13319	6.51408e-17	**
S1N-S1T	hsa-miR-410	2.0901	8.3187	1.99279	3.5978e-32	**
S1N-S1T	hsa-miR-411-5p	8.1734	5.862	-0.479543	0.000193642
S1N-S1T	hsa-miR-421	9.7956	0.01	-9.93599	2.5102e-113	**
S1N-S1T	hsa-miR-423-3p	76.0872	41.1559	-0.886555	7.9776e-86
S1N-S1T	hsa-miR-423-5p	143.471	392.562	1.45216	0	**
S1N-S1T	hsa-miR-425-5p	3.0884	7.9296	1.36039	1.3421e-18	**
S1N-S1T	hsa-miR-4286	0.3744	1.8486	2.30378	1.55501e-09	**
S1N-S1T	hsa-miR-429	11.4801	0.01	-10.1649	1.10968e-132	**
S1N-S1T	hsa-miR-432-5p	8.1734	17.0023	1.05672	3.50603e-26	**
S1N-S1T	hsa-miR-4435	0.5303	1.8973	1.83907	1.14362e-07	**
S1N-S1T	hsa-miR-4449	4.6794	56.9177	3.60448	0	**
S1N-S1T	hsa-miR-4454	1.8094	1.8729	0.0497625	0.854329
S1N-S1T	hsa-miR-4482-3p	0.01	1.8729	7.54913	5.94067e-20	**
S1N-S1T	hsa-miR-4485	2.4645	0.0243	-6.66419	1.94973e-27	**
S1N-S1T	hsa-miR-449a	0.01	4.7188	8.88228	3.04119e-49	**
S1N-S1T	hsa-miR-449c-5p	0.01	2.2378	7.80594	1.04377e-23	**
S1N-S1T	hsa-miR-451a	1.3102	0.01	-7.03364	7.74647e-16	**
S1N-S1T	hsa-miR-452-5p	1.5598	0.01	-7.28522	1.0514e-18	**
S1N-S1T	hsa-miR-454-3p	1.6846	0.01	-7.39626	3.87348e-20	**
S1N-S1T	hsa-miR-454-5p	0.156	2.2864	3.87346	4.2867e-18	**
S1N-S1T	hsa-miR-455-5p	5.3657	0.01	-9.06762	1.972e-62	**
S1N-S1T	hsa-miR-4677-3p	2.0901	0.01	-7.70743	8.48558e-25	**
S1N-S1T	hsa-miR-4709-5p	0.01	1.9459	7.60429	1.05388e-20	**
S1N-S1T	hsa-miR-4786-5p	1.5286	0.01	-7.25607	2.39986e-18	**
S1N-S1T	hsa-miR-484	6.3016	2.9918	-1.0747	3.22481e-11	**
S1N-S1T	hsa-miR-485-5p	0.4055	1.9459	2.26266	8.68217e-10	**
S1N-S1T	hsa-miR-486-3p	0.7487	2.3837	1.67074	2.46564e-08	**
S1N-S1T	hsa-miR-486-5p	1623.04	4159.81	1.35782	0	**
S1N-S1T	hsa-miR-493-5p	4.3363	0.0243	-7.47936	1.05665e-48	**
S1N-S1T	hsa-miR-497-5p	11.2618	6.2512	-0.849232	3.33065e-13
S1N-S1T	hsa-miR-500a-3p	38.3399	23.059	-0.733517	2.77564e-32
S1N-S1T	hsa-miR-501-3p	106.035	79.4415	-0.416581	5.17133e-32
S1N-S1T	hsa-miR-502-3p	1.9965	0.01	-7.64133	1.00909e-23	**
S1N-S1T	hsa-miR-504	3.9931	4.135	0.0503781	0.772949
S1N-S1T	hsa-miR-505-3p	1.2478	0.01	-6.96324	4.03587e-15	**
S1N-S1T	hsa-miR-508-3p	1.0295	0.01	-6.6858	1.30273e-12	**
S1N-S1T	hsa-miR-509-3p	3.182	0.01	-8.31379	2.42153e-37	**
S1N-S1T	hsa-miR-532-5p	118.514	25.7346	-2.20327	0	**
S1N-S1T	hsa-miR-542-3p	1.2478	0.7297	-0.774011	0.0252317
S1N-S1T	hsa-miR-543	1.279	0.01	-6.99887	1.76816e-15	**
S1N-S1T	hsa-miR-561-5p	0.01	4.5485	8.82925	1.71982e-47	**
S1N-S1T	hsa-miR-574-3p	11.293	7.4431	-0.601453	7.36077e-08
S1N-S1T	hsa-miR-574-5p	3.8683	0.01	-8.59556	3.15441e-45	**
S1N-S1T	hsa-miR-582-3p	8.3293	0.3405	-4.61247	9.52792e-77	**
S1N-S1T	hsa-miR-589-5p	6.52	1.3135	-2.31146	3.03757e-32	**
S1N-S1T	hsa-miR-590-3p	0.01	1.9946	7.63996	3.3273e-21	**
S1N-S1T	hsa-miR-598	4.5858	0.0243	-7.56007	1.51508e-51	**
S1N-S1T	hsa-miR-615-3p	0.01	3.5269	8.46226	5.62506e-37	**
S1N-S1T	hsa-miR-625-3p	3.0884	0.01	-8.27072	2.87966e-36	**
S1N-S1T	hsa-miR-629-5p	1.8406	0.01	-7.52403	6.25196e-22	**
S1N-S1T	hsa-miR-6511a-3p	1.2478	0.01	-6.96324	4.03587e-15	**
S1N-S1T	hsa-miR-652-3p	0.2184	2.0189	3.20852	5.23092e-14	**
S1N-S1T	hsa-miR-654-3p	2.87	4.5972	0.679705	0.000160418
S1N-S1T	hsa-miR-660-5p	12.7592	6.1539	-1.05196	1.6971e-20	**
S1N-S1T	hsa-miR-664a-3p	6.0832	2.2621	-1.42717	3.27273e-16	**
S1N-S1T	hsa-miR-671-3p	14.1318	32.9101	1.21959	2.77492e-61	**
S1N-S1T	hsa-miR-6716-3p	0.5615	1.8243	1.69999	8.46241e-07	**
S1N-S1T	hsa-miR-6724-5p	0.4679	1.6054	1.77866	1.94754e-06	**
S1N-S1T	hsa-miR-744-3p	0.01	2.0189	7.65743	1.86958e-21	**
S1N-S1T	hsa-miR-744-5p	13.0399	26.9021	1.04479	9.03628e-40	**
S1N-S1T	hsa-miR-769-5p	47.418	45.5585	-0.0577146	0.245793
S1N-S1T	hsa-miR-873-3p	5.085	0.01	-8.9901	3.31634e-59	**
S1N-S1T	hsa-miR-874	5.3033	9.9484	0.907574	9.60475e-13
S1N-S1T	hsa-miR-887	1.5286	0.01	-7.25607	2.39986e-18	**
S1N-S1T	hsa-miR-889	0.6863	3.1134	2.18158	2.59304e-14	**
S1N-S1T	hsa-miR-891a	1.3414	0.01	-7.0676	3.3938e-16	**
S1N-S1T	hsa-miR-92a-1-5p	0.5927	2.5054	2.07967	3.57907e-11	**
S1N-S1T	hsa-miR-92a-3p	1528.73	2158.25	0.497527	0
S1N-S1T	hsa-miR-92b-3p	437.244	557.234	0.349845	3.91576e-115
S1N-S1T	hsa-miR-93-3p	0.01	1.8	7.49185	3.34874e-19	**
S1N-S1T	hsa-miR-93-5p	128.216	56.942	-1.17101	3.11122e-226	**
S1N-S1T	hsa-miR-937-3p	0.2184	1.9459	3.15539	2.32235e-13	**
S1N-S1T	hsa-miR-941	63.4528	76.8875	0.277065	1.08086e-11
S1N-S1T	hsa-miR-9-5p	30.0106	25.6616	-0.225861	0.000450716
S1N-S1T	hsa-miR-96-5p	1.9342	1.9459	0.00870059	0.98266
S1N-S1T	hsa-miR-98-5p	260.705	65.3094	-1.99706	0	**
S1N-S1T	hsa-miR-99a-3p	9.2028	1.9702	-2.22373	8.40438e-43	**
S1N-S1T	hsa-miR-99a-5p	2445.58	529.334	-2.20793	0	**
S1N-S1T	hsa-miR-99b-3p	5.2409	0.01	-9.03367	5.35273e-61	**
S1N-S1T	hsa-miR-99b-5p	18120.7	7362.13	-1.29944	0	**

## Sheet: S2N-S2T
pairwise	miR-name	S2N-std	S2T-std	fold-change(log2 S2T/S2N)	p-value	sig-lable
S2N-S2T	hsa-let-7a-3p	2.6873	6.9249	1.36564	2.20337e-13	**
S2N-S2T	hsa-let-7a-5p	10997.9	12907.1	0.230941	0
S2N-S2T	hsa-let-7b-3p	0.7144	6.8866	3.26899	3.4814e-37	**
S2N-S2T	hsa-let-7b-5p	721.739	1352.61	0.906196	0
S2N-S2T	hsa-let-7c	4130.58	5988.07	0.535746	0
S2N-S2T	hsa-let-7d-3p	30.4112	55.9347	0.879141	2.87108e-48
S2N-S2T	hsa-let-7d-5p	126.917	192.481	0.600826	6.89972e-84
S2N-S2T	hsa-let-7e-3p	1.5648	1.8747	0.260681	0.377215
S2N-S2T	hsa-let-7e-5p	745.108	630.891	-0.240059	5.672e-59
S2N-S2T	hsa-let-7f-1-3p	1.0205	0.4591	-1.1524	0.0163378	*
S2N-S2T	hsa-let-7f-2-3p	0.01	1.4921	7.2212	1.61847e-13	**
S2N-S2T	hsa-let-7f-5p	6226.95	5703.46	-0.126688	3.58557e-140
S2N-S2T	hsa-let-7g-5p	616.014	942.855	0.614073	0
S2N-S2T	hsa-let-7i-5p	1522.87	902.721	-0.754443	0
S2N-S2T	hsa-miR-1	0.3742	1.4538	1.95795	1.53816e-05	**
S2N-S2T	hsa-miR-100-3p	1.3947	0.5739	-1.28108	0.00216421	**
S2N-S2T	hsa-miR-100-5p	5973.35	5154.37	-0.212745	0
S2N-S2T	hsa-miR-101-3p	157.771	214.977	0.446354	3.82084e-55
S2N-S2T	hsa-miR-103a-3p	304.758	522.274	0.777141	0
S2N-S2T	hsa-miR-106a-5p	0.4762	5.8536	3.61968	1.09066e-34	**
S2N-S2T	hsa-miR-106b-3p	16.7704	60.7935	1.858	1.54254e-163	**
S2N-S2T	hsa-miR-106b-5p	2.3132	4.3233	0.902243	3.44483e-05
S2N-S2T	hsa-miR-107	75.1095	89.5261	0.253313	3.22582e-09
S2N-S2T	hsa-miR-10a-5p	10242.1	4198.24	-1.28666	0	**
S2N-S2T	hsa-miR-10b-3p	1.5308	1.2243	-0.322329	0.339602
S2N-S2T	hsa-miR-10b-5p	200810	79925.6	-1.3291	0	**
S2N-S2T	hsa-miR-1180	4.1501	9.6795	1.22179	1.78203e-15	**
S2N-S2T	hsa-miR-1247-3p	2.7214	2.6399	-0.0438657	0.858738
S2N-S2T	hsa-miR-1247-5p	4.048	14.6915	1.8597	6.4347e-41	**
S2N-S2T	hsa-miR-1248	1.1906	12.5872	3.4022	3.98931e-69	**
S2N-S2T	hsa-miR-125a-3p	2.1091	3.4816	0.723123	0.0021316
S2N-S2T	hsa-miR-125a-5p	2667.48	5975.52	1.16359	0	**
S2N-S2T	hsa-miR-125b-1-3p	37.2146	38.4503	0.0471261	0.453905
S2N-S2T	hsa-miR-125b-2-3p	298.431	491.437	0.719608	4.82806e-290
S2N-S2T	hsa-miR-125b-5p	962.239	2594.15	1.4308	0	**
S2N-S2T	hsa-miR-126-3p	12.008	12.9698	0.11116	0.31012
S2N-S2T	hsa-miR-126-5p	102.731	272.787	1.4089	0	**
S2N-S2T	hsa-miR-1268a	0.6463	3.099	2.26153	3.3338e-12	**
S2N-S2T	hsa-miR-1268b	0.6463	3.099	2.26153	3.3338e-12	**
S2N-S2T	hsa-miR-1271-5p	9.6608	12.2429	0.341731	0.00362237
S2N-S2T	hsa-miR-127-3p	339.762	716.055	1.07555	0	**
S2N-S2T	hsa-miR-1275	0.01	7.537	9.55785	3.13328e-65	**
S2N-S2T	hsa-miR-128	8.3682	22.5728	1.4316	5.38298e-43	**
S2N-S2T	hsa-miR-1285-3p	0.01	1.1478	6.84273	1.4282e-10	**
S2N-S2T	hsa-miR-1291	0.4422	1.5304	1.79114	2.94643e-05	**
S2N-S2T	hsa-miR-1296	4.8644	10.5977	1.12342	7.0196e-15	**
S2N-S2T	hsa-miR-1307-3p	11.94	22.8789	0.938215	6.06606e-23
S2N-S2T	hsa-miR-1307-5p	3.2656	0.8417	-1.95597	1.37818e-10	**
S2N-S2T	hsa-miR-130a-3p	110.521	95.724	-0.207371	6.06019e-08
S2N-S2T	hsa-miR-130b-3p	2.5513	10.5212	2.04399	1.45699e-33	**
S2N-S2T	hsa-miR-130b-5p	0.8504	3.0607	1.84765	1.32801e-09	**
S2N-S2T	hsa-miR-132-3p	1.939	15.5332	3.00197	1.68505e-75	**
S2N-S2T	hsa-miR-133a	147.634	150.626	0.0289459	0.361655
S2N-S2T	hsa-miR-133b	2.7894	1.5686	-0.830477	0.00216922
S2N-S2T	hsa-miR-134	1.5988	3.2903	1.04123	4.72562e-05	**
S2N-S2T	hsa-miR-1343	0.01	1.1095	6.79377	3.03449e-10	**
S2N-S2T	hsa-miR-135a-5p	0.01	8.8761	9.79378	1.09791e-76	**
S2N-S2T	hsa-miR-136-3p	2.3472	3.8259	0.704858	0.00164022
S2N-S2T	hsa-miR-136-5p	0.01	3.6346	8.50565	7.59293e-32	**
S2N-S2T	hsa-miR-139-5p	3.5038	0.5356	-2.70969	5.95312e-16	**
S2N-S2T	hsa-miR-140-3p	57.4547	80.7647	0.4913	1.16368e-25
S2N-S2T	hsa-miR-140-5p	0.01	1.6069	7.32814	1.68737e-14	**
S2N-S2T	hsa-miR-141-3p	61.6388	932.601	3.91935	0	**
S2N-S2T	hsa-miR-141-5p	0.01	9.7178	9.92449	6.9184e-84	**
S2N-S2T	hsa-miR-142-3p	0.5783	1.0713	0.889473	0.0427839
S2N-S2T	hsa-miR-142-5p	24.9345	62.7448	1.33135	2.82119e-104	**
S2N-S2T	hsa-miR-143-3p	358362	166845	-1.10291	0	**
S2N-S2T	hsa-miR-143-5p	11.0895	17.4078	0.65054	3.75487e-10
S2N-S2T	hsa-miR-145-3p	111.508	261.271	1.2284	0	**
S2N-S2T	hsa-miR-145-5p	2552.77	1343.73	-0.925818	0
S2N-S2T	hsa-miR-1468	8.7424	18.7852	1.1035	1.63773e-24	**
S2N-S2T	hsa-miR-146a-5p	95.7238	140.984	0.558586	1.54952e-54
S2N-S2T	hsa-miR-146b-3p	10.8174	11.4012	0.0758319	0.512962
S2N-S2T	hsa-miR-146b-5p	628.26	1079.48	0.7809	0
S2N-S2T	hsa-miR-148a-3p	2082.18	10328.6	2.31048	0	**
S2N-S2T	hsa-miR-148a-5p	40.4462	147.871	1.87026	0	**
S2N-S2T	hsa-miR-148b-3p	6.4292	23.2615	1.85523	1.37728e-63	**
S2N-S2T	hsa-miR-148b-5p	0.068	1.9895	4.87073	3.87016e-15	**
S2N-S2T	hsa-miR-149-5p	10.035	16.2983	0.699681	1.01782e-10
S2N-S2T	hsa-miR-150-5p	81.0625	33.1706	-1.28913	1.45311e-125	**
S2N-S2T	hsa-miR-151a-3p	1006.26	1927.34	0.937609	0
S2N-S2T	hsa-miR-151a-5p	228.968	766.481	1.7431	0	**
S2N-S2T	hsa-miR-151b	17.8589	64.1603	1.84504	7.50928e-171	**
S2N-S2T	hsa-miR-152	6.2251	4.9354	-0.33493	0.0431269
S2N-S2T	hsa-miR-153	0.3402	1.2243	1.8475	0.000139926	**
S2N-S2T	hsa-miR-155-5p	16.5323	41.5875	1.33086	1.05373e-69	**
S2N-S2T	hsa-miR-15a-5p	0.7484	10.9421	3.86994	5.18824e-67	**
S2N-S2T	hsa-miR-15b-5p	1.8369	6.7336	1.8741	8.55034e-20	**
S2N-S2T	hsa-miR-16-5p	77.7288	229.592	1.56255	0	**
S2N-S2T	hsa-miR-17-3p	0.7484	2.4486	1.71008	2.84484e-07	**
S2N-S2T	hsa-miR-17-5p	2.8914	18.8999	2.70854	3.20735e-82	**
S2N-S2T	hsa-miR-181a-2-3p	28.9825	15.7627	-0.878667	1.68984e-25
S2N-S2T	hsa-miR-181a-3p	5.6468	4.0172	-0.491243	0.00598153
S2N-S2T	hsa-miR-181a-5p	3262.47	3021.27	-0.110806	1.24991e-57
S2N-S2T	hsa-miR-181b-5p	196.176	208.206	0.0858596	0.00164098
S2N-S2T	hsa-miR-181c-3p	4.2861	2.2573	-0.925067	2.98833e-05
S2N-S2T	hsa-miR-181c-5p	83.9539	89.8704	0.0982487	0.0181539
S2N-S2T	hsa-miR-181d	41.0585	37.9912	-0.112016	0.0699584
S2N-S2T	hsa-miR-182-5p	1023.4	3568.76	1.80205	0	**
S2N-S2T	hsa-miR-183-5p	163.316	555.827	1.76697	0	**
S2N-S2T	hsa-miR-184	21.975	0.9947	-4.46546	6.04116e-141	**
S2N-S2T	hsa-miR-186-5p	189.475	673.511	1.8297	0	**
S2N-S2T	hsa-miR-187-3p	1.3947	0.01	-7.12381	4.98988e-12	**
S2N-S2T	hsa-miR-190a	3.1636	2.4103	-0.392354	0.0956967
S2N-S2T	hsa-miR-190b	0.9525	2.1042	1.14348	0.00045603	**
S2N-S2T	hsa-miR-191-5p	3763.84	16512.5	2.13328	0	**
S2N-S2T	hsa-miR-192-5p	302.683	267.048	-0.180711	4.14797e-15
S2N-S2T	hsa-miR-193a-5p	1.1226	1.5304	0.447065	0.186737
S2N-S2T	hsa-miR-193b-3p	6.8714	20.392	1.56933	1.7696e-44	**
S2N-S2T	hsa-miR-193b-5p	1.7349	3.4816	1.0049	4.79514e-05	**
S2N-S2T	hsa-miR-194-5p	3.6738	4.7059	0.357198	0.0600455
S2N-S2T	hsa-miR-195-3p	21.0225	17.1018	-0.297786	0.000851067
S2N-S2T	hsa-miR-195-5p	19.3217	40.8989	1.08184	8.01579e-50	**
S2N-S2T	hsa-miR-196a-5p	5.3407	1.1478	-2.21816	4.7249e-19	**
S2N-S2T	hsa-miR-196b-5p	40.3782	127.517	1.65904	6.88184e-291	**
S2N-S2T	hsa-miR-197-3p	4.5243	8.8761	0.972231	2.53051e-10
S2N-S2T	hsa-miR-199a-3p	239.208	358.946	0.585504	8.17208e-148
S2N-S2T	hsa-miR-199a-5p	22.2471	41.0902	0.885177	2.56578e-36
S2N-S2T	hsa-miR-199b-3p	239.208	358.946	0.585504	8.17208e-148
S2N-S2T	hsa-miR-199b-5p	9.5248	36.1165	1.9229	1.57284e-102	**
S2N-S2T	hsa-miR-19a-3p	7.2796	27.7378	1.92992	1.5051e-79	**
S2N-S2T	hsa-miR-19b-3p	57.6928	190.645	1.72442	0	**
S2N-S2T	hsa-miR-200a-3p	1.5308	6.7718	2.14525	1.7547e-23	**
S2N-S2T	hsa-miR-200b-3p	34.4932	23.7971	-0.535526	1.67241e-13
S2N-S2T	hsa-miR-200b-5p	1.8709	0.5739	-1.70486	1.06896e-05	**
S2N-S2T	hsa-miR-200c-3p	28.03	197.11	2.81396	0	**
S2N-S2T	hsa-miR-203a	9.5928	22.2285	1.21239	4.02578e-33	**
S2N-S2T	hsa-miR-204-5p	307.207	122.888	-1.32187	0	**
S2N-S2T	hsa-miR-205-5p	324.25	489.103	0.593032	2.74263e-205
S2N-S2T	hsa-miR-20a-5p	5.919	21.8076	1.88141	7.59971e-61	**
S2N-S2T	hsa-miR-20b-5p	4.4222	8.9909	1.0237	3.04764e-11	**
S2N-S2T	hsa-miR-210	4.2181	5.5093	0.385276	0.028973
S2N-S2T	hsa-miR-212-3p	1.2926	2.4103	0.898937	0.00208126
S2N-S2T	hsa-miR-212-5p	0.9185	3.4816	1.9224	2.96719e-11	**
S2N-S2T	hsa-miR-21-3p	17.961	51.114	1.50885	9.21828e-103	**
S2N-S2T	hsa-miR-214-3p	6.6673	12.9698	0.959982	3.80551e-14
S2N-S2T	hsa-miR-214-5p	1.939	2.219	0.194597	0.467322
S2N-S2T	hsa-miR-215	2.6533	0.9565	-1.47195	2.2211e-06	**
S2N-S2T	hsa-miR-21-5p	2282.54	4730.38	1.05132	0	**
S2N-S2T	hsa-miR-218-1-3p	1.0205	1.3008	0.350123	0.331518
S2N-S2T	hsa-miR-218-5p	3.2316	12.8168	1.98772	3.98526e-39	**
S2N-S2T	hsa-miR-221-3p	1255.91	672.593	-0.900924	0
S2N-S2T	hsa-miR-221-5p	41.2966	16.834	-1.29464	2.73663e-65	**
S2N-S2T	hsa-miR-222-3p	947.713	810.096	-0.226358	9.15291e-67
S2N-S2T	hsa-miR-223-3p	1.1226	0.2678	-2.06762	0.000118633	**
S2N-S2T	hsa-miR-22-3p	1035.99	2493.53	1.26718	0	**
S2N-S2T	hsa-miR-224-5p	2.9935	8.3787	1.48489	7.93866e-18	**
S2N-S2T	hsa-miR-22-5p	0.01	1.3773	7.1057	1.55238e-12	**
S2N-S2T	hsa-miR-23a-3p	47.4877	97.79	1.04213	9.44653e-110	**
S2N-S2T	hsa-miR-23b-3p	134.503	193.629	0.525653	1.17282e-66
S2N-S2T	hsa-miR-24-3p	75.0075	96.9866	0.370751	9.64066e-19
S2N-S2T	hsa-miR-25-3p	565.396	1665.41	1.55855	0	**
S2N-S2T	hsa-miR-26a-5p	2082.59	4480.59	1.10531	0	**
S2N-S2T	hsa-miR-26b-3p	0.9185	10.483	3.51263	1.89395e-59	**
S2N-S2T	hsa-miR-26b-5p	144.062	514.277	1.83586	0	**
S2N-S2T	hsa-miR-27a-3p	27.962	54.8251	0.971369	1.08745e-55
S2N-S2T	hsa-miR-27a-5p	1.1906	1.7599	0.563805	0.0803898
S2N-S2T	hsa-miR-27b-3p	2669.25	3448.67	0.369607	0
S2N-S2T	hsa-miR-27b-5p	13.2666	14.3471	0.11296	0.278281
S2N-S2T	hsa-miR-28-3p	1550.53	1571.68	0.0195471	0.0464135
S2N-S2T	hsa-miR-28-5p	43.1676	85.5471	0.98677	4.23014e-88
S2N-S2T	hsa-miR-29a-3p	36.8064	100.468	1.44871	2.23628e-188	**
S2N-S2T	hsa-miR-29b-3p	1.0545	4.5911	2.12228	3.45285e-16	**
S2N-S2T	hsa-miR-29c-3p	13.2326	50.7697	1.93987	4.77864e-145	**
S2N-S2T	hsa-miR-29c-5p	0.5783	4.7059	3.02458	4.2118e-24	**
S2N-S2T	hsa-miR-301a-3p	1.8029	3.6346	1.01148	2.9583e-05	**
S2N-S2T	hsa-miR-30a-3p	172.466	138.88	-0.312472	1.37148e-23
S2N-S2T	hsa-miR-30a-5p	2012.99	1754.29	-0.198453	7.43853e-109
S2N-S2T	hsa-miR-30b-5p	16.3962	88.8374	2.43781	0	**
S2N-S2T	hsa-miR-30c-1-3p	7.6198	7.8814	0.0486988	0.724225
S2N-S2T	hsa-miR-30c-2-3p	38.9154	22.5728	-0.785756	4.0353e-28
S2N-S2T	hsa-miR-30c-5p	59.4957	110.262	0.890084	2.55747e-95
S2N-S2T	hsa-miR-30d-3p	1.3947	17.5609	3.65434	7.78091e-102	**
S2N-S2T	hsa-miR-30d-5p	431.233	2513.39	2.54309	0	**
S2N-S2T	hsa-miR-30e-3p	95.6898	69.7462	-0.456251	2.57692e-26
S2N-S2T	hsa-miR-30e-5p	50.3451	156.403	1.63534	0	**
S2N-S2T	hsa-miR-31-5p	6.1571	6.3893	0.0534069	0.727465
S2N-S2T	hsa-miR-320a	272.068	392.958	0.530409	1.76562e-135
S2N-S2T	hsa-miR-320b	14.2531	23.7971	0.73951	2.38801e-16
S2N-S2T	hsa-miR-324-3p	1.1906	2.2955	0.94712	0.00169792
S2N-S2T	hsa-miR-324-5p	0.7484	1.5304	1.03203	0.00603104	**
S2N-S2T	hsa-miR-32-5p	0.01	1.0713	6.74322	6.44739e-10	**
S2N-S2T	hsa-miR-328	41.2286	34.5479	-0.255047	5.49631e-05
S2N-S2T	hsa-miR-330-3p	1.4967	0.01	-7.22564	7.40132e-13	**
S2N-S2T	hsa-miR-331-5p	0.01	1.8364	7.52074	1.83409e-16	**
S2N-S2T	hsa-miR-335-3p	0.8504	3.9024	2.19815	1.53276e-14	**
S2N-S2T	hsa-miR-338-3p	0.8504	4.6293	2.44458	3.99854e-19	**
S2N-S2T	hsa-miR-338-5p	0.01	2.9077	8.18373	1.25624e-25	**
S2N-S2T	hsa-miR-339-3p	2.1771	5.1267	1.23562	5.34949e-09	**
S2N-S2T	hsa-miR-339-5p	2.4492	2.1425	-0.193015	0.457848
S2N-S2T	hsa-miR-33b-5p	0.01	1.0713	6.74322	6.44739e-10	**
S2N-S2T	hsa-miR-340-5p	55.5157	39.1772	-0.502882	9.9245e-19
S2N-S2T	hsa-miR-342-3p	128.04	162.754	0.346097	7.05273e-27
S2N-S2T	hsa-miR-342-5p	0.8504	4.1702	2.2939	3.35551e-16	**
S2N-S2T	hsa-miR-345-5p	15.7499	23.8354	0.597763	1.07232e-11
S2N-S2T	hsa-miR-34a-5p	11.5658	17.9817	0.636664	4.227e-10
S2N-S2T	hsa-miR-34c-5p	1.1906	1.7982	0.594865	0.0636878
S2N-S2T	hsa-miR-3605-3p	2.3472	5.6241	1.26068	5.26705e-10	**
S2N-S2T	hsa-miR-3605-5p	0.7824	3.252	2.05535	1.88964e-11	**
S2N-S2T	hsa-miR-3607-3p	23.5398	66.4176	1.49646	2.35933e-131	**
S2N-S2T	hsa-miR-3609	0.5103	2.1042	2.04385	7.98664e-08	**
S2N-S2T	hsa-miR-3613-5p	0.3402	1.9512	2.51991	4.24836e-09	**
S2N-S2T	hsa-miR-361-3p	4.3542	22.9171	2.39594	1.8146e-86	**
S2N-S2T	hsa-miR-3615	1.8369	7.1544	1.96156	3.61613e-22	**
S2N-S2T	hsa-miR-361-5p	21.0905	61.2909	1.53908	1.87951e-126	**
S2N-S2T	hsa-miR-362-5p	0.01	1.4156	7.14527	7.30636e-13	**
S2N-S2T	hsa-miR-363-3p	35.3777	131.114	1.88991	0	**
S2N-S2T	hsa-miR-3651	2.2791	21.6929	3.25069	3.89186e-113	**
S2N-S2T	hsa-miR-3653	0.8844	6.8866	2.96102	6.81992e-34	**
S2N-S2T	hsa-miR-365a-3p	2.9935	15.6479	2.38606	2.65511e-59	**
S2N-S2T	hsa-miR-365b-3p	2.9935	15.6479	2.38606	2.65511e-59	**
S2N-S2T	hsa-miR-3687	0.3742	1.5686	2.0676	3.20607e-06	**
S2N-S2T	hsa-miR-369-5p	0.01	2.7546	8.1057	2.56015e-24	**
S2N-S2T	hsa-miR-370	0.6123	1.3773	1.16953	0.00397504	**
S2N-S2T	hsa-miR-374a-3p	6.9054	9.1439	0.405085	0.00319915
S2N-S2T	hsa-miR-374a-5p	3.2316	11.2481	1.79936	2.26217e-30	**
S2N-S2T	hsa-miR-374b-5p	12.4842	19.9712	0.677818	3.4421e-12
S2N-S2T	hsa-miR-375	3227.97	21126.2	2.71033	0	**
S2N-S2T	hsa-miR-378a-3p	721.432	574.574	-0.328373	3.865e-102
S2N-S2T	hsa-miR-378a-5p	2.1771	1.5304	-0.508499	0.0800139
S2N-S2T	hsa-miR-378c	13.947	13.3906	-0.0587342	0.577978
S2N-S2T	hsa-miR-378d	2.6533	3.5581	0.423319	0.0554585
S2N-S2T	hsa-miR-379-5p	1.8709	0.1148	-4.02654	2.43493e-12	**
S2N-S2T	hsa-miR-381-3p	11.4637	12.7785	0.156646	0.159251
S2N-S2T	hsa-miR-3909	0.7824	2.219	1.50393	8.58542e-06	**
S2N-S2T	hsa-miR-3913-5p	1.1566	0.4591	-1.33301	0.0040989	**
S2N-S2T	hsa-miR-3940-3p	0.01	3.1755	8.31084	6.42668e-28	**
S2N-S2T	hsa-miR-409-3p	49.6308	56.0112	0.17448	0.00107853
S2N-S2T	hsa-miR-409-5p	0.5103	3.252	2.67191	3.58275e-15	**
S2N-S2T	hsa-miR-410	5.3067	5.7388	0.112934	0.491703
S2N-S2T	hsa-miR-411-5p	7.1436	14.8827	1.05891	1.45237e-18	**
S2N-S2T	hsa-miR-421	9.5248	20.5068	1.10634	1.02422e-26	**
S2N-S2T	hsa-miR-423-3p	79.1916	216.202	1.44896	0	**
S2N-S2T	hsa-miR-423-5p	143.484	482.102	1.74845	0	**
S2N-S2T	hsa-miR-424-3p	0.7824	1.4538	0.893851	0.0175721
S2N-S2T	hsa-miR-424-5p	1.1226	0.88	-0.351269	0.377754
S2N-S2T	hsa-miR-425-3p	0.8504	2.4103	1.503	3.5238e-06	**
S2N-S2T	hsa-miR-425-5p	1.5648	23.2615	3.89389	2.52573e-141	**
S2N-S2T	hsa-miR-4286	0.01	9.2204	9.84869	1.24418e-79	**
S2N-S2T	hsa-miR-429	4.014	4.3998	0.132397	0.481788
S2N-S2T	hsa-miR-432-5p	4.048	11.6307	1.52266	5.23493e-25	**
S2N-S2T	hsa-miR-4326	0.01	1.0713	6.74322	6.44739e-10	**
S2N-S2T	hsa-miR-4446-3p	0.01	1.4921	7.2212	1.61847e-13	**
S2N-S2T	hsa-miR-4449	2.007	40.5163	4.33539	1.41467e-264	**
S2N-S2T	hsa-miR-4454	0.01	24.4475	11.2555	6.76433e-210	**
S2N-S2T	hsa-miR-449a	0.01	17.4078	10.7655	1.13001e-149	**
S2N-S2T	hsa-miR-449b-5p	0.01	2.4486	7.93581	1.06329e-21	**
S2N-S2T	hsa-miR-449c-5p	0.7144	36.1165	5.65978	1.23755e-272	**
S2N-S2T	hsa-miR-450a-5p	0.01	1.1478	6.84273	1.4282e-10	**
S2N-S2T	hsa-miR-450b-5p	1.1906	2.1042	0.821583	0.00773505
S2N-S2T	hsa-miR-451a	5.3067	5.5858	0.0739489	0.653626
S2N-S2T	hsa-miR-452-5p	1.5988	1.3391	-0.255726	0.433827
S2N-S2T	hsa-miR-454-3p	3.2316	3.7111	0.199598	0.336517
S2N-S2T	hsa-miR-455-3p	1.5308	0.4591	-1.73741	5.70613e-05	**
S2N-S2T	hsa-miR-455-5p	4.1501	4.9737	0.261173	0.150384
S2N-S2T	hsa-miR-4677-3p	1.2586	1.6069	0.35246	0.277635
S2N-S2T	hsa-miR-4746-5p	0.4762	1.2625	1.40664	0.00147437	**
S2N-S2T	hsa-miR-4770	0.6803	1.3008	0.935156	0.0197529
S2N-S2T	hsa-miR-484	6.089	20.392	1.74373	1.77061e-51	**
S2N-S2T	hsa-miR-485-5p	0.8844	3.2138	1.86151	4.18752e-10	**
S2N-S2T	hsa-miR-486-3p	1.2586	2.7929	1.14994	4.88307e-05	**
S2N-S2T	hsa-miR-486-5p	3163.34	1584.61	-0.997321	0
S2N-S2T	hsa-miR-487b	0.01	1.8364	7.52074	1.83409e-16	**
S2N-S2T	hsa-miR-490-3p	1.1906	0.2678	-2.15246	4.69865e-05	**
S2N-S2T	hsa-miR-493-5p	3.4697	1.7217	-1.01098	5.37732e-05	**
S2N-S2T	hsa-miR-497-5p	10.4432	21.1572	1.01858	3.1092e-24	**
S2N-S2T	hsa-miR-500a-3p	29.4247	57.618	0.969492	2.97636e-58
S2N-S2T	hsa-miR-501-3p	101.031	83.7489	-0.270649	2.31617e-11
S2N-S2T	hsa-miR-502-3p	4.9665	2.4486	-1.02027	1.07945e-06	**
S2N-S2T	hsa-miR-504	2.041	6.3127	1.62898	1.37606e-15	**
S2N-S2T	hsa-miR-505-3p	0.4762	4.3233	3.18249	2.5761e-23	**
S2N-S2T	hsa-miR-509-3p	2.1091	0.6121	-1.78479	1.35625e-06	**
S2N-S2T	hsa-miR-532-3p	2.1771	1.033	-1.07557	0.000798853	**
S2N-S2T	hsa-miR-532-5p	93.4107	84.8585	-0.138529	0.000759914
S2N-S2T	hsa-miR-539-3p	1.3267	0.01	-7.0517	1.78078e-11	**
S2N-S2T	hsa-miR-542-3p	1.5988	1.5686	-0.027512	0.936005
S2N-S2T	hsa-miR-548k	0.01	1.9512	7.60822	1.91217e-17	**
S2N-S2T	hsa-miR-550a-3p	0.01	1.3391	7.06512	3.29835e-12	**
S2N-S2T	hsa-miR-5696	0.01	1.3008	7.02326	7.00802e-12	**
S2N-S2T	hsa-miR-574-3p	15.4097	23.2615	0.594105	2.43622e-11
S2N-S2T	hsa-miR-574-5p	2.3132	9.1056	1.97686	4.55455e-28	**
S2N-S2T	hsa-miR-576-5p	0.01	1.7599	7.45935	8.27976e-16	**
S2N-S2T	hsa-miR-582-3p	6.4292	3.8642	-0.734469	2.62009e-05
S2N-S2T	hsa-miR-589-5p	5.8509	12.1281	1.05162	2.97786e-15	**
S2N-S2T	hsa-miR-590-3p	0.6463	1.033	0.676564	0.115986
S2N-S2T	hsa-miR-598	4.3542	2.1042	-1.04914	3.03253e-06	**
S2N-S2T	hsa-miR-625-3p	0.8164	2.219	1.44256	1.60557e-05	**
S2N-S2T	hsa-miR-625-5p	1.2246	0.8034	-0.60812	0.125599
S2N-S2T	hsa-miR-628-3p	0.8504	2.8312	1.7352	2.39073e-08	**
S2N-S2T	hsa-miR-629-5p	0.01	6.9249	9.43565	5.40468e-60	**
S2N-S2T	hsa-miR-651	0.01	2.1425	7.74315	4.41607e-19	**
S2N-S2T	hsa-miR-6511b-3p	2.5173	0.6887	-1.86993	4.82328e-08	**
S2N-S2T	hsa-miR-652-3p	0.5443	1.6451	1.5957	6.49991e-05	**
S2N-S2T	hsa-miR-654-3p	6.5653	11.0186	0.747008	1.82372e-08
S2N-S2T	hsa-miR-654-5p	0.5783	1.033	0.83695	0.0588754
S2N-S2T	hsa-miR-659-5p	0.9525	1.7217	0.854043	0.0128417
S2N-S2T	hsa-miR-660-5p	9.0145	17.5226	0.958897	1.50594e-18
S2N-S2T	hsa-miR-664a-3p	6.8714	16.6044	1.27289	4.95066e-27	**
S2N-S2T	hsa-miR-664b-3p	1.2926	0.1148	-3.49308	4.3852e-08	**
S2N-S2T	hsa-miR-671-3p	10.035	46.9055	2.22472	5.64398e-160	**
S2N-S2T	hsa-miR-6724-5p	0.4762	1.186	1.31646	0.003408	**
S2N-S2T	hsa-miR-744-5p	29.969	79.3492	1.40474	1.77252e-142	**
S2N-S2T	hsa-miR-7-5p	0.6463	4.0555	2.6496	2.02089e-18	**
S2N-S2T	hsa-miR-769-5p	35.3777	100.392	1.50473	3.87026e-199	**
S2N-S2T	hsa-miR-873-3p	6.3952	1.9129	-1.74123	8.17317e-17	**
S2N-S2T	hsa-miR-873-5p	1.8029	0.4591	-1.97344	1.84376e-06	**
S2N-S2T	hsa-miR-874	6.6333	10.2152	0.622919	3.92359e-06
S2N-S2T	hsa-miR-877-5p	0.7144	1.1478	0.684067	0.0941123
S2N-S2T	hsa-miR-887	1.4287	3.3285	1.22017	3.309e-06	**
S2N-S2T	hsa-miR-889	1.6668	0.4974	-1.7446	2.47626e-05	**
S2N-S2T	hsa-miR-891a	0.7484	1.9129	1.35388	0.00013682	**
S2N-S2T	hsa-miR-92a-1-5p	0.01	1.1095	6.79377	3.03449e-10	**
S2N-S2T	hsa-miR-92a-3p	1158.21	6080.77	2.39236	0	**
S2N-S2T	hsa-miR-92b-3p	342.517	1180.14	1.78471	0	**
S2N-S2T	hsa-miR-93-3p	0.6463	1.8747	1.53638	3.31365e-05	**
S2N-S2T	hsa-miR-93-5p	78.4772	382.246	2.28415	0	**
S2N-S2T	hsa-miR-941	55.0735	222.591	2.01496	0	**
S2N-S2T	hsa-miR-9-5p	11.8719	13.6585	0.202248	0.0624074
S2N-S2T	hsa-miR-96-5p	2.5173	15.2271	2.59669	1.39413e-63	**
S2N-S2T	hsa-miR-98-5p	181.821	132.988	-0.451218	1.54479e-47
S2N-S2T	hsa-miR-99a-3p	9.5928	20.8129	1.11745	1.66085e-27	**
S2N-S2T	hsa-miR-99a-5p	2822.49	3769.28	0.417318	0
S2N-S2T	hsa-miR-99b-3p	1.973	5.2032	1.39901	9.55191e-11	**
S2N-S2T	hsa-miR-99b-5p	17597.1	12402.7	-0.504684	0

## Sheet: S3N-S3T
pairwise	miR-name	S3N-std	S3T-std	fold-change(log2 S3T/S3N)	p-value	sig-lable
S3N-S3T	hsa-let-7a-3p	2.8609	3.6493	0.351151	0.0989927
S3N-S3T	hsa-let-7a-5p	6653.82	7140.16	0.101773	1.2301e-109
S3N-S3T	hsa-let-7b-3p	2.9342	2.1831	-0.426589	0.0735287
S3N-S3T	hsa-let-7b-5p	1285.04	942.474	-0.44729	0
S3N-S3T	hsa-let-7c	3679.22	3953.8	0.103839	5.89682e-64
S3N-S3T	hsa-let-7d-3p	43.4998	35.8091	-0.280683	3.33282e-06
S3N-S3T	hsa-let-7d-5p	158.815	103.908	-0.612032	7.16502e-75
S3N-S3T	hsa-let-7e-3p	1.7972	4.3662	1.28063	2.17218e-08	**
S3N-S3T	hsa-let-7e-5p	738.69	500.351	-0.56203	9.06619e-293
S3N-S3T	hsa-let-7f-5p	7480.58	5057.07	-0.564847	0
S3N-S3T	hsa-let-7g-5p	831.265	384.191	-1.11349	0	**
S3N-S3T	hsa-let-7i-5p	1324.62	1400.01	0.0798618	8.52167e-15
S3N-S3T	hsa-miR-100-3p	0.8436	1.564	0.89061	0.0132891
S3N-S3T	hsa-miR-100-5p	12411.1	8331.02	-0.57507	0
S3N-S3T	hsa-miR-101-3p	128.299	213.454	0.734416	5.41567e-136
S3N-S3T	hsa-miR-103a-3p	254.654	455.841	0.839996	0
S3N-S3T	hsa-miR-106b-3p	30.6993	50.1132	0.706985	2.90942e-31
S3N-S3T	hsa-miR-106b-5p	1.2104	0.01	-6.91934	1.4664e-11	**
S3N-S3T	hsa-miR-107	73.1355	119.125	0.703831	2.22453e-71
S3N-S3T	hsa-miR-10a-3p	0.7336	1.0427	0.507259	0.221571
S3N-S3T	hsa-miR-10a-5p	18155.3	18031.3	-0.00988356	0.000462345
S3N-S3T	hsa-miR-10b-3p	0.4401	1.3033	1.56627	0.000433935	**
S3N-S3T	hsa-miR-10b-5p	98033.3	154762	0.658703	0
S3N-S3T	hsa-miR-1180	5.2082	2.9651	-0.812704	2.1416e-05
S3N-S3T	hsa-miR-1245a	0.01	1.3685	7.09645	2.68717e-12	**
S3N-S3T	hsa-miR-1247-3p	6.8587	3.6819	-0.897485	1.09982e-07
S3N-S3T	hsa-miR-1247-5p	30.0024	27.0442	-0.149759	0.035082
S3N-S3T	hsa-miR-1248	0.8069	5.6369	2.80444	9.33135e-27	**
S3N-S3T	hsa-miR-125a-3p	2.8242	4.2033	0.57368	0.00534396
S3N-S3T	hsa-miR-125a-5p	9747.78	5709.42	-0.771728	0
S3N-S3T	hsa-miR-125b-1-3p	69.9445	45.7471	-0.61253	5.18742e-34
S3N-S3T	hsa-miR-125b-2-3p	430.267	410.583	-0.0675569	0.000263168
S3N-S3T	hsa-miR-125b-5p	2825.03	2721.07	-0.0540922	6.22835e-14
S3N-S3T	hsa-miR-126-3p	27.9851	7.6571	-1.86979	3.22676e-80	**
S3N-S3T	hsa-miR-126-5p	315.429	88.4639	-1.83415	0	**
S3N-S3T	hsa-miR-1271-5p	12.7639	12.7075	-0.00638898	0.949888
S3N-S3T	hsa-miR-127-3p	703.443	825.859	0.231461	1.84782e-63
S3N-S3T	hsa-miR-1275	0.8803	1.3033	0.566102	0.129438
S3N-S3T	hsa-miR-128	17.8987	10.9806	-0.704898	3.26127e-12
S3N-S3T	hsa-miR-1287	0.2201	1.1078	2.33147	2.58342e-05	**
S3N-S3T	hsa-miR-1296	6.4553	5.8324	-0.146394	0.338
S3N-S3T	hsa-miR-1298	2.8975	1.5314	-0.919957	0.000434246
S3N-S3T	hsa-miR-1301	1.1003	0.01	-6.78175	1.40842e-10	**
S3N-S3T	hsa-miR-1307-3p	7.1522	8.6346	0.271742	0.045684
S3N-S3T	hsa-miR-130a-3p	174.696	230.332	0.398866	6.24508e-50
S3N-S3T	hsa-miR-130b-3p	5.9051	2.6718	-1.14415	1.74459e-09	**
S3N-S3T	hsa-miR-130b-5p	1.5038	0.01	-7.23247	3.51807e-14	**
S3N-S3T	hsa-miR-132-3p	5.2816	5.8324	0.143115	0.377982
S3N-S3T	hsa-miR-133a	172.569	52.8502	-1.70719	0	**
S3N-S3T	hsa-miR-133b	1.5771	1.1078	-0.509577	0.122827
S3N-S3T	hsa-miR-134	2.4207	7.0054	1.53304	4.15213e-16	**
S3N-S3T	hsa-miR-1343	0.7336	1.0427	0.507259	0.221571
S3N-S3T	hsa-miR-135a-5p	1.5771	0.01	-7.30113	7.78605e-15	**
S3N-S3T	hsa-miR-136-3p	2.0173	1.0101	-0.997928	0.00170133
S3N-S3T	hsa-miR-139-5p	1.4304	1.5966	0.158584	0.616193
S3N-S3T	hsa-miR-140-3p	79.3707	121.666	0.616252	5.37317e-58
S3N-S3T	hsa-miR-140-5p	1.137	0.01	-6.82909	6.62581e-11	**
S3N-S3T	hsa-miR-141-3p	489.098	131.995	-1.88964	0	**
S3N-S3T	hsa-miR-141-5p	2.0906	2.0853	-0.0036621	0.983237
S3N-S3T	hsa-miR-142-3p	3.1543	2.9977	-0.0734639	0.73069
S3N-S3T	hsa-miR-142-5p	230.63	127.271	-0.857679	3.01581e-193
S3N-S3T	hsa-miR-143-3p	412382	216392	-0.930331	0
S3N-S3T	hsa-miR-143-5p	15.9181	10.8829	-0.548605	1.51421e-07
S3N-S3T	hsa-miR-145-3p	458.289	185.367	-1.30587	0	**
S3N-S3T	hsa-miR-145-5p	1587.6	1541.91	-0.0421253	1.13648e-05
S3N-S3T	hsa-miR-1468	22.8869	28.0217	0.292022	0.000111975
S3N-S3T	hsa-miR-146a-5p	478.828	73.5407	-2.70289	0	**
S3N-S3T	hsa-miR-146b-3p	20.6496	23.8185	0.205969	0.010787
S3N-S3T	hsa-miR-146b-5p	2438.19	1381.44	-0.819641	0
S3N-S3T	hsa-miR-148a-3p	3047.96	6174.71	1.01853	0	**
S3N-S3T	hsa-miR-148a-5p	38.8417	154.347	1.9905	0	**
S3N-S3T	hsa-miR-148b-3p	11.7369	11.6974	-0.00486351	0.962688
S3N-S3T	hsa-miR-148b-5p	2.6041	1.8247	-0.513126	0.045847
S3N-S3T	hsa-miR-149-5p	20.5395	7.3638	-1.47988	6.38735e-43	**
S3N-S3T	hsa-miR-150-3p	2.164	3.7471	0.792074	0.000477745
S3N-S3T	hsa-miR-150-5p	86.8163	98.5322	0.182629	3.81088e-06
S3N-S3T	hsa-miR-151a-3p	1540.17	1614.05	0.0675938	1.58229e-12
S3N-S3T	hsa-miR-151a-5p	800.492	408.107	-0.97194	0
S3N-S3T	hsa-miR-151b	63.0491	40.4686	-0.639673	3.58387e-33
S3N-S3T	hsa-miR-152	8.0691	4.7246	-0.772216	4.12313e-07
S3N-S3T	hsa-miR-1538	1.027	0.01	-6.68229	6.36384e-10	**
S3N-S3T	hsa-miR-155-5p	52.7793	23.8836	-1.14395	1.33206e-72	**
S3N-S3T	hsa-miR-15a-5p	15.1112	4.0729	-1.89149	8.70353e-45	**
S3N-S3T	hsa-miR-15b-5p	5.0615	6.9403	0.455433	0.00365504
S3N-S3T	hsa-miR-16-2-3p	2.2373	1.2708	-0.816022	0.00526439
S3N-S3T	hsa-miR-16-5p	294.963	167.576	-0.815714	2.08961e-226
S3N-S3T	hsa-miR-17-3p	1.8339	1.4663	-0.322735	0.275176
S3N-S3T	hsa-miR-17-5p	2.5308	1.173	-1.10939	0.000125073	**
S3N-S3T	hsa-miR-181a-2-3p	19.7326	44.9977	1.18927	5.11957e-65	**
S3N-S3T	hsa-miR-181a-3p	9.8663	16.5524	0.746459	2.51579e-12
S3N-S3T	hsa-miR-181a-5p	3966.04	2639.78	-0.587284	0
S3N-S3T	hsa-miR-181b-5p	226.852	171.812	-0.400918	6.26901e-50
S3N-S3T	hsa-miR-181c-3p	7.3356	2.1179	-1.79228	4.6289e-21	**
S3N-S3T	hsa-miR-181c-5p	160.979	107.525	-0.582195	1.64892e-69
S3N-S3T	hsa-miR-181d	59.8581	28.543	-1.06841	1.15438e-73	**
S3N-S3T	hsa-miR-182-5p	1408.43	10050.1	2.83506	0	**
S3N-S3T	hsa-miR-183-5p	200.811	673.336	1.74549	0	**
S3N-S3T	hsa-miR-184	2.7142	0.01	-8.08438	5.48301e-25	**
S3N-S3T	hsa-miR-186-5p	494.893	188.788	-1.39035	0	**
S3N-S3T	hsa-miR-190a	0.2934	1.0427	1.82938	0.000475077	**
S3N-S3T	hsa-miR-190b	1.137	0.01	-6.82909	6.62581e-11	**
S3N-S3T	hsa-miR-191-5p	8932.58	15642	0.808281	0
S3N-S3T	hsa-miR-192-5p	7542.52	283.541	-4.73342	0	**
S3N-S3T	hsa-miR-193a-5p	2.5674	5.474	1.09229	3.18149e-08	**
S3N-S3T	hsa-miR-193b-3p	11.5535	3.9752	-1.53923	2.93658e-26	**
S3N-S3T	hsa-miR-193b-5p	1.6505	0.782	-1.07766	0.00252719	**
S3N-S3T	hsa-miR-194-3p	2.054	0.01	-7.68229	4.30429e-19	**
S3N-S3T	hsa-miR-194-5p	147.261	3.4213	-5.42769	0	**
S3N-S3T	hsa-miR-195-3p	23.2537	15.6726	-0.569216	5.30748e-11
S3N-S3T	hsa-miR-195-5p	48.2679	29.9767	-0.687222	4.65594e-29
S3N-S3T	hsa-miR-196a-5p	10.5999	1.4663	-2.8538	1.4885e-51	**
S3N-S3T	hsa-miR-196b-5p	70.6047	45.1932	-0.643659	2.45838e-37
S3N-S3T	hsa-miR-197-3p	5.7584	20.6253	1.84068	5.17795e-57	**
S3N-S3T	hsa-miR-199a-3p	457.628	345.449	-0.405704	5.24654e-101
S3N-S3T	hsa-miR-199a-5p	68.404	80.5461	0.235734	9.14561e-08
S3N-S3T	hsa-miR-199b-3p	457.555	344.341	-0.410107	5.31597e-103
S3N-S3T	hsa-miR-199b-5p	27.7284	27.0116	-0.0377853	0.601356
S3N-S3T	hsa-miR-19a-3p	3.411	2.6067	-0.38797	0.0772248
S3N-S3T	hsa-miR-19b-3p	29.599	21.4399	-0.46525	7.29155e-10
S3N-S3T	hsa-miR-200a-3p	32.3498	15.1839	-1.09121	5.42872e-42	**
S3N-S3T	hsa-miR-200a-5p	3.5577	0.01	-8.4748	1.60942e-32	**
S3N-S3T	hsa-miR-200b-3p	139.962	91.0054	-0.621014	6.63498e-68
S3N-S3T	hsa-miR-200b-5p	10.8199	15.2816	0.498108	2.73307e-06
S3N-S3T	hsa-miR-200c-3p	84.2121	38.6765	-1.12257	2.47905e-111	**
S3N-S3T	hsa-miR-203a	41.8493	5.5392	-2.91745	4.40534e-203	**
S3N-S3T	hsa-miR-204-5p	633.498	533.814	-0.247005	1.47763e-55
S3N-S3T	hsa-miR-205-5p	795.064	57.4771	-3.79001	0	**
S3N-S3T	hsa-miR-20a-5p	2.5308	3.9752	0.651434	0.00241535
S3N-S3T	hsa-miR-20b-5p	1.3204	1.8573	0.492232	0.109364
S3N-S3T	hsa-miR-210	7.5189	8.8627	0.237225	0.0754376
S3N-S3T	hsa-miR-2110	0.4401	1.3685	1.63669	0.000196391	**
S3N-S3T	hsa-miR-2116-3p	0.0367	1.0427	4.8284	2.56032e-08	**
S3N-S3T	hsa-miR-212-3p	2.5308	3.2258	0.350063	0.12233
S3N-S3T	hsa-miR-212-5p	3.1176	4.9853	0.677244	0.000432362
S3N-S3T	hsa-miR-21-3p	72.732	55.3918	-0.392918	1.50891e-16
S3N-S3T	hsa-miR-214-3p	10.5265	24.796	1.23608	8.77373e-39	**
S3N-S3T	hsa-miR-214-5p	2.5674	2.7044	0.0750005	0.754336
S3N-S3T	hsa-miR-215	511.251	7.1032	-6.16942	0	**
S3N-S3T	hsa-miR-21-5p	3805.65	4088.04	0.103268	2.25858e-65
S3N-S3T	hsa-miR-218-1-3p	2.1273	1.8573	-0.195817	0.46452
S3N-S3T	hsa-miR-218-5p	11.8102	6.0279	-0.970306	9.84488e-14
S3N-S3T	hsa-miR-219-1-3p	1.8706	1.4337	-0.383758	0.195217
S3N-S3T	hsa-miR-221-3p	394.249	163.015	-1.27411	0	**
S3N-S3T	hsa-miR-221-5p	20.6863	8.3088	-1.31596	2.07304e-36	**
S3N-S3T	hsa-miR-222-3p	597.004	195.109	-1.61346	0	**
S3N-S3T	hsa-miR-223-3p	3.5577	1.5966	-1.15594	2.52079e-06	**
S3N-S3T	hsa-miR-22-3p	2335.53	1191.67	-0.970763	0
S3N-S3T	hsa-miR-224-5p	17.8621	0.0326	-9.09781	7.91087e-158	**
S3N-S3T	hsa-miR-22-5p	1.2104	0.01	-6.91934	1.4664e-11	**
S3N-S3T	hsa-miR-23a-3p	142.2	98.4344	-0.530684	2.22868e-52
S3N-S3T	hsa-miR-23b-3p	391.902	171.193	-1.19487	0	**
S3N-S3T	hsa-miR-23b-5p	0.5868	2.4763	2.07725	3.12209e-09	**
S3N-S3T	hsa-miR-24-2-5p	1.8339	1.1404	-0.685375	0.0300527
S3N-S3T	hsa-miR-24-3p	215.445	96.3165	-1.16147	1.84067e-297	**
S3N-S3T	hsa-miR-25-3p	665.958	1240.48	0.897397	0
S3N-S3T	hsa-miR-25-5p	0.4401	1.0753	1.28884	0.005901	**
S3N-S3T	hsa-miR-26a-5p	7459.16	3571.99	-1.06229	0	**
S3N-S3T	hsa-miR-26b-3p	3.7778	3.7145	-0.0243783	0.897118
S3N-S3T	hsa-miR-26b-5p	314.218	197.195	-0.672148	1.90918e-172
S3N-S3T	hsa-miR-27a-3p	116.048	82.4685	-0.492812	7.63201e-38
S3N-S3T	hsa-miR-27a-5p	2.2373	2.1505	-0.0570866	0.819036
S3N-S3T	hsa-miR-27b-3p	8410.58	4371.94	-0.943931	0
S3N-S3T	hsa-miR-27b-5p	27.5083	30.3025	0.13957	0.04865
S3N-S3T	hsa-miR-28-3p	2354.97	3700.14	0.65187	0
S3N-S3T	hsa-miR-28-5p	113.884	37.6664	-1.59622	1.31122e-256	**
S3N-S3T	hsa-miR-29a-3p	110.107	59.2366	-0.89434	4.83478e-100
S3N-S3T	hsa-miR-29b-2-5p	0.4768	1.8247	1.9362	1.27389e-06	**
S3N-S3T	hsa-miR-29b-3p	4.4747	3.2258	-0.472134	0.0152377
S3N-S3T	hsa-miR-29c-3p	18.0821	15.4445	-0.227469	0.0142032
S3N-S3T	hsa-miR-29c-5p	2.9342	0.8798	-1.73772	6.14488e-09	**
S3N-S3T	hsa-miR-301a-3p	2.6775	4.1055	0.616671	0.00331545
S3N-S3T	hsa-miR-30a-3p	92.4646	120.102	0.377292	2.29245e-24
S3N-S3T	hsa-miR-30a-5p	1956.69	1021.42	-0.93783	0
S3N-S3T	hsa-miR-30b-5p	34.7705	34.2126	-0.0233361	0.716837
S3N-S3T	hsa-miR-30c-1-3p	7.9591	3.3235	-1.2599	4.38894e-14	**
S3N-S3T	hsa-miR-30c-2-3p	21.053	25.7409	0.290037	0.000234822
S3N-S3T	hsa-miR-30c-5p	95.839	57.64	-0.733543	1.37969e-62
S3N-S3T	hsa-miR-30d-3p	2.8975	0.9123	-1.66723	2.04124e-08	**
S3N-S3T	hsa-miR-30d-5p	987.585	740.49	-0.415425	2.88091e-225
S3N-S3T	hsa-miR-30e-3p	84.7623	89.4088	0.0769941	0.0587274
S3N-S3T	hsa-miR-30e-5p	143.117	61.6803	-1.21431	9.3687e-213	**
S3N-S3T	hsa-miR-31-5p	22.2267	4.4965	-2.30542	1.38936e-83	**
S3N-S3T	hsa-miR-320a	275.743	329.19	0.255594	1.73915e-31
S3N-S3T	hsa-miR-320b	29.5256	22.1241	-0.416348	2.83261e-08
S3N-S3T	hsa-miR-320c	0.7336	1.7269	1.23512	0.00067506	**
S3N-S3T	hsa-miR-320d	0.5868	1.0753	0.873798	0.0445939
S3N-S3T	hsa-miR-324-3p	1.6505	0.9123	-0.855323	0.0127103
S3N-S3T	hsa-miR-328	34.4404	24.9589	-0.464548	3.24126e-11
S3N-S3T	hsa-miR-330-3p	0.4401	1.8247	2.05176	4.90781e-07	**
S3N-S3T	hsa-miR-330-5p	0.6969	1.7269	1.30916	0.000376013	**
S3N-S3T	hsa-miR-331-3p	0.8069	1.8898	1.22777	0.000395711	**
S3N-S3T	hsa-miR-335-3p	4.3647	4.3662	0.00049572	0.998247
S3N-S3T	hsa-miR-337-3p	0.1834	1.2382	2.75518	9.89732e-07	**
S3N-S3T	hsa-miR-338-3p	7.9958	1.3685	-2.54665	7.95162e-35	**
S3N-S3T	hsa-miR-338-5p	1.5038	0.01	-7.23247	3.51807e-14	**
S3N-S3T	hsa-miR-339-3p	6.1619	4.1055	-0.585817	0.000530482
S3N-S3T	hsa-miR-339-5p	0.8803	1.8573	1.07714	0.00155709	**
S3N-S3T	hsa-miR-340-5p	19.6226	49.5267	1.33569	3.73246e-85	**
S3N-S3T	hsa-miR-342-3p	213.061	442.156	1.05329	0	**
S3N-S3T	hsa-miR-342-5p	4.6581	4.4313	-0.0720116	0.683117
S3N-S3T	hsa-miR-345-5p	25.1609	9.8076	-1.35921	4.42811e-46	**
S3N-S3T	hsa-miR-34a-5p	9.793	12.0884	0.303801	0.00851082
S3N-S3T	hsa-miR-34c-5p	2.9342	1.4337	-1.03322	9.62806e-05	**
S3N-S3T	hsa-miR-3605-3p	5.5383	8.0155	0.533349	0.000306239
S3N-S3T	hsa-miR-3605-5p	3.6311	4.7246	0.379786	0.0430614
S3N-S3T	hsa-miR-3607-3p	7.1155	33.1699	2.22084	3.92652e-115	**
S3N-S3T	hsa-miR-3609	0.1467	2.4763	4.07725	9.52506e-17	**
S3N-S3T	hsa-miR-361-3p	14.8912	9.775	-0.607291	2.613e-08
S3N-S3T	hsa-miR-3615	4.2179	10.0683	1.25522	4.84436e-17	**
S3N-S3T	hsa-miR-361-5p	55.7135	16.7479	-1.73405	2.59578e-142	**
S3N-S3T	hsa-miR-3620-5p	0.01	1.2708	6.98959	1.80949e-11	**
S3N-S3T	hsa-miR-362-5p	1.3571	0.01	-7.08438	7.18254e-13	**
S3N-S3T	hsa-miR-363-3p	108.97	28.3801	-1.94097	1.18575755001899e-322	**
S3N-S3T	hsa-miR-3651	3.7411	11.7626	1.65267	7.98011e-29	**
S3N-S3T	hsa-miR-3653	1.0637	2.5089	1.23796	3.7993e-05	**
S3N-S3T	hsa-miR-365a-3p	6.3086	6.7773	0.103391	0.489529
S3N-S3T	hsa-miR-365b-3p	6.3086	6.7773	0.103391	0.489529
S3N-S3T	hsa-miR-369-5p	1.8339	1.4011	-0.388355	0.194702
S3N-S3T	hsa-miR-370	0.8069	1.0427	0.369862	0.36237
S3N-S3T	hsa-miR-374a-3p	3.301	8.4065	1.3486	5.49193e-16	**
S3N-S3T	hsa-miR-374a-5p	6.4553	4.7572	-0.440371	0.00625857
S3N-S3T	hsa-miR-374b-5p	24.5007	11.5345	-1.08687	5.14022e-32	**
S3N-S3T	hsa-miR-375	3942.27	20080.1	2.34867	0	**
S3N-S3T	hsa-miR-378a-3p	596.637	337.075	-0.823784	0
S3N-S3T	hsa-miR-378a-5p	0.4768	1.2056	1.3383	0.00263913	**
S3N-S3T	hsa-miR-378c	12.287	12.1536	-0.015749	0.882417
S3N-S3T	hsa-miR-378d	2.8242	4.0729	0.528214	0.0109439
S3N-S3T	hsa-miR-379-5p	1.2837	0.01	-7.00416	3.24537e-12	**
S3N-S3T	hsa-miR-381-3p	11.0767	14.5648	0.394958	0.000218562
S3N-S3T	hsa-miR-3909	1.6872	0.01	-7.39849	8.10656e-16	**
S3N-S3T	hsa-miR-3913-5p	0.4401	1.2708	1.52983	0.000640381	**
S3N-S3T	hsa-miR-409-3p	45.8472	104.69	1.19122	3.55076e-149	**
S3N-S3T	hsa-miR-409-5p	4.1079	2.3134	-0.828386	0.000125517
S3N-S3T	hsa-miR-410	10.3431	12.121	0.22884	0.0443993
S3N-S3T	hsa-miR-411-5p	17.9721	14.6951	-0.290424	0.00201984
S3N-S3T	hsa-miR-421	14.231	6.5818	-1.11248	5.99253e-20	**
S3N-S3T	hsa-miR-423-3p	173.449	134.113	-0.371061	1.27085e-33
S3N-S3T	hsa-miR-423-5p	309.964	471.286	0.604503	7.84025e-212
S3N-S3T	hsa-miR-425-3p	2.6041	0.01	-8.02464	5.26623e-24	**
S3N-S3T	hsa-miR-425-5p	11.9203	10.7525	-0.148748	0.186592
S3N-S3T	hsa-miR-4286	0.2567	1.4011	2.4484	1.01174e-06	**
S3N-S3T	hsa-miR-429	24.9776	9.5795	-1.38261	6.33626e-47	**
S3N-S3T	hsa-miR-432-5p	10.8199	10.9806	0.0212697	0.855911
S3N-S3T	hsa-miR-433	0.11	1.8247	4.05208	1.38479e-12	**
S3N-S3T	hsa-miR-4446-3p	0.2567	1.5966	2.63685	4.97974e-08	**
S3N-S3T	hsa-miR-4449	3.0809	19.2894	2.64638	1.15318e-82	**
S3N-S3T	hsa-miR-4454	4.438	1.3359	-1.7321	9.12883e-13	**
S3N-S3T	hsa-miR-4485	0.9169	2.5415	1.47084	2.26769e-06	**
S3N-S3T	hsa-miR-450b-5p	0.7702	1.2056	0.646446	0.100984
S3N-S3T	hsa-miR-451a	23.7305	2.7044	-3.13336	1.69413e-124	**
S3N-S3T	hsa-miR-452-5p	2.0173	0.01	-7.65628	9.14946e-19	**
S3N-S3T	hsa-miR-454-3p	3.6311	3.2909	-0.141924	0.484665
S3N-S3T	hsa-miR-454-5p	2.164	3.8123	0.816961	0.000296563
S3N-S3T	hsa-miR-455-5p	5.3183	4.1055	-0.373407	0.0332709
S3N-S3T	hsa-miR-4677-3p	1.1737	0.8798	-0.415816	0.269119
S3N-S3T	hsa-miR-4687-3p	0.01	1.173	6.87406	1.21847e-10	**
S3N-S3T	hsa-miR-4757-3p	0.01	1.6618	7.3766	8.80063e-15	**
S3N-S3T	hsa-miR-4781-3p	0.0734	2.7044	5.20338	1.06939e-20	**
S3N-S3T	hsa-miR-484	20.6863	10.2312	-1.0157	1.3805e-24	**
S3N-S3T	hsa-miR-485-5p	0.5868	1.7595	1.58422	3.49451e-05	**
S3N-S3T	hsa-miR-486-3p	3.0443	6.5818	1.11237	7.33399e-10	**
S3N-S3T	hsa-miR-486-5p	4612.19	7829.01	0.763377	0
S3N-S3T	hsa-miR-487a	0.0367	1.173	4.99828	2.24277e-09	**
S3N-S3T	hsa-miR-487b	1.6138	0.01	-7.33432	3.66289e-15	**
S3N-S3T	hsa-miR-493-5p	2.2007	0.7494	-1.55415	3.50234e-06	**
S3N-S3T	hsa-miR-497-5p	20.2094	11.0458	-0.871529	5.78812e-19
S3N-S3T	hsa-miR-500a-3p	61.2152	82.827	0.436211	3.74547e-22
S3N-S3T	hsa-miR-501-3p	110.107	160.701	0.545481	1.97649e-61
S3N-S3T	hsa-miR-502-3p	4.2546	3.7145	-0.195855	0.302162
S3N-S3T	hsa-miR-504	5.7951	6.1257	0.0800412	0.610536
S3N-S3T	hsa-miR-511	1.1003	0.01	-6.78175	1.40842e-10	**
S3N-S3T	hsa-miR-532-5p	89.4937	100.683	0.169958	1.31771e-05
S3N-S3T	hsa-miR-539-3p	0.11	1.2708	3.53016	2.52705e-08	**
S3N-S3T	hsa-miR-541-3p	0.0734	1.2708	4.11381	3.64244e-09	**
S3N-S3T	hsa-miR-548k	1.6138	0.8472	-0.929687	0.00820418
S3N-S3T	hsa-miR-574-3p	19.6593	37.3731	0.926788	9.39091e-37
S3N-S3T	hsa-miR-574-5p	2.3841	1.6943	-0.492755	0.0656388
S3N-S3T	hsa-miR-576-3p	0.01	1.173	6.87406	1.21847e-10	**
S3N-S3T	hsa-miR-577	4.9515	1.3033	-1.9257	4.66271e-16	**
S3N-S3T	hsa-miR-582-3p	4.1079	3.91	-0.0712325	0.704012
S3N-S3T	hsa-miR-584-5p	1.7605	0.01	-7.45984	1.79411e-16	**
S3N-S3T	hsa-miR-589-5p	7.1888	8.5368	0.247944	0.0687287
S3N-S3T	hsa-miR-592	0.01	1.173	6.87406	1.21847e-10	**
S3N-S3T	hsa-miR-598	2.9342	5.0504	0.78343	5.76155e-05
S3N-S3T	hsa-miR-605	0.01	1.1404	6.8334	2.30093e-10	**
S3N-S3T	hsa-miR-618	0.1467	1.0101	2.78356	9.71548e-06	**
S3N-S3T	hsa-miR-625-3p	2.9342	3.7797	0.365305	0.0814043
S3N-S3T	hsa-miR-628-3p	3.0809	6.8751	1.15803	7.98284e-11	**
S3N-S3T	hsa-miR-629-5p	3.1176	2.9651	-0.0723551	0.735926
S3N-S3T	hsa-miR-6503-3p	0.2201	1.1404	2.37331	1.5871e-05	**
S3N-S3T	hsa-miR-6509-5p	0.1834	1.4011	2.93349	7.11702e-08	**
S3N-S3T	hsa-miR-6510-3p	2.5308	0.01	-7.98345	2.37951e-23	**
S3N-S3T	hsa-miR-6511a-3p	0.7702	1.7921	1.21835	0.000609863	**
S3N-S3T	hsa-miR-652-3p	2.2373	0.9449	-1.24353	7.86576e-05	**
S3N-S3T	hsa-miR-654-3p	10.1597	17.3018	0.768064	2.15563e-13
S3N-S3T	hsa-miR-654-5p	0.11	1.0427	3.24475	1.2738e-06	**
S3N-S3T	hsa-miR-660-5p	14.0476	9.1559	-0.61755	4.08349e-08
S3N-S3T	hsa-miR-664a-3p	9.8663	10.1334	0.0385373	0.750996
S3N-S3T	hsa-miR-664a-5p	1.5405	1.2056	-0.353647	0.275952
S3N-S3T	hsa-miR-671-3p	25.8211	44.8347	0.796065	3.40241e-34
S3N-S3T	hsa-miR-6716-3p	0.5502	3.0954	2.4921	1.25692e-13	**
S3N-S3T	hsa-miR-675-3p	0.01	1.2382	6.9521	3.41698e-11	**
S3N-S3T	hsa-miR-708-5p	2.5308	0.4888	-2.37228	3.78967e-11	**
S3N-S3T	hsa-miR-7-2-3p	0.01	1.0101	6.65835	2.92584e-09	**
S3N-S3T	hsa-miR-744-5p	39.6853	38.2203	-0.0542656	0.371561
S3N-S3T	hsa-miR-769-5p	52.4125	65.1342	0.313504	2.93136e-10
S3N-S3T	hsa-miR-873-3p	4.0346	1.4988	-1.42862	3.34796e-09	**
S3N-S3T	hsa-miR-873-5p	1.9806	0.01	-7.62979	1.94486e-18	**
S3N-S3T	hsa-miR-874	12.6171	13.6524	0.113774	0.27949
S3N-S3T	hsa-miR-887	3.1176	1.5966	-0.965433	0.000144252
S3N-S3T	hsa-miR-889	2.164	2.1831	0.0126777	0.96651
S3N-S3T	hsa-miR-891a	2.7508	1.1078	-1.31215	4.89029e-06	**
S3N-S3T	hsa-miR-92a-3p	2518.48	2306.06	-0.127125	9.27724e-61
S3N-S3T	hsa-miR-92b-3p	1896.57	1397.76	-0.440274	0
S3N-S3T	hsa-miR-93-5p	65.103	81.491	0.323917	3.57368e-13
S3N-S3T	hsa-miR-941	114.875	119.06	0.0516241	0.141828
S3N-S3T	hsa-miR-9-5p	8.5459	27.5655	1.68956	2.32291e-67	**
S3N-S3T	hsa-miR-96-5p	3.8512	6.1908	0.684818	7.37341e-05
S3N-S3T	hsa-miR-98-5p	124.301	98.7277	-0.33231	2.89968e-20
S3N-S3T	hsa-miR-99a-3p	10.1231	6.1257	-0.724705	8.03218e-08
S3N-S3T	hsa-miR-99a-5p	4703.85	4718.33	0.00443586	0.422705
S3N-S3T	hsa-miR-99b-3p	5.575	9.8402	0.819716	4.9691e-09
S3N-S3T	hsa-miR-99b-5p	17926	19673.6	0.134212	0

## Sheet: S4N-S4T
airwise	miR-name	S4N-std	S4T-std	fold-change(log2 S4T/S4N)	p-value	sig-lable
S4N-S4T	hsa-let-7a-3p	0.3559	3.4115	3.26086	4.17549e-26	**
S4N-S4T	hsa-let-7a-5p	2884.14	2440.33	-0.241066	0
S4N-S4T	hsa-let-7b-3p	0.522	1.0607	1.02289	0.00743103	**
S4N-S4T	hsa-let-7b-5p	403.468	487.905	0.274146	1.14199e-68
S4N-S4T	hsa-let-7c	2079	1551.98	-0.421779	0
S4N-S4T	hsa-let-7d-3p	21.5436	20.8705	-0.0457942	0.525382
S4N-S4T	hsa-let-7d-5p	60.621	91.8817	0.59996	7.23073e-56
S4N-S4T	hsa-let-7e-3p	2.1354	2.6661	0.320225	0.13227
S4N-S4T	hsa-let-7e-5p	195.458	135.113	-0.53269	2.03968e-93
S4N-S4T	hsa-let-7f-5p	3730.84	2812.44	-0.407678	0
S4N-S4T	hsa-let-7g-5p	257.527	825.674	1.68085	0	**
S4N-S4T	hsa-let-7i-3p	0.2373	1.2041	2.34317	1.84386e-07	**
S4N-S4T	hsa-let-7i-5p	975.773	950.381	-0.03804	0.000352342
S4N-S4T	hsa-miR-1	0.783	6.651	3.08649	5.37783e-47	**
S4N-S4T	hsa-miR-100-3p	1.4236	1.9781	0.474572	0.0615959
S4N-S4T	hsa-miR-100-5p	8028.07	11158.5	0.475015	0
S4N-S4T	hsa-miR-101-3p	133.532	378.65	1.50368	0	**
S4N-S4T	hsa-miR-101-5p	0.01	2.0354	7.66917	3.38135e-25	**
S4N-S4T	hsa-miR-103a-3p	269.817	261.483	-0.0452636	0.0255894
S4N-S4T	hsa-miR-106a-5p	1.044	1.0607	0.022895	0.932392
S4N-S4T	hsa-miR-106b-3p	30.1563	26.1454	-0.205902	0.000978484
S4N-S4T	hsa-miR-106b-5p	1.1389	8.6005	2.91678	5.25618e-57	**
S4N-S4T	hsa-miR-107	83.1848	95.7232	0.202549	6.57614e-09
S4N-S4T	hsa-miR-10a-5p	8711.49	8216.75	-0.0843522	5.93227e-122
S4N-S4T	hsa-miR-10b-3p	1.5659	2.4655	0.654888	0.00528638
S4N-S4T	hsa-miR-10b-5p	243361	55915.6	-2.12178	0	**
S4N-S4T	hsa-miR-1180	3.3217	4.4149	0.410459	0.0146745
S4N-S4T	hsa-miR-1247-3p	3.7488	1.6914	-1.14821	4.74797e-08	**
S4N-S4T	hsa-miR-1247-5p	6.762	4.4149	-0.615069	1.50905e-05
S4N-S4T	hsa-miR-125a-3p	1.1389	1.8921	0.732347	0.00702144
S4N-S4T	hsa-miR-125a-5p	3402.49	2907.76	-0.226681	1.97626258336499e-323
S4N-S4T	hsa-miR-125b-1-3p	27.2854	67.5997	1.30889	7.38599e-151	**
S4N-S4T	hsa-miR-125b-2-3p	343.677	276.849	-0.311955	1.31731e-61
S4N-S4T	hsa-miR-125b-5p	1025.05	831.149	-0.302518	6.50246e-170
S4N-S4T	hsa-miR-126-3p	20.3098	115.275	2.50483	0	**
S4N-S4T	hsa-miR-126-5p	213.277	2091.12	3.29348	0	**
S4N-S4T	hsa-miR-1271-5p	18.7439	16.2262	-0.208096	0.0086912
S4N-S4T	hsa-miR-127-3p	631.764	1575.98	1.31879	0	**
S4N-S4T	hsa-miR-127-5p	1.2338	2.2648	0.876275	0.00057549
S4N-S4T	hsa-miR-128	7.806	26.6615	1.7721	3.98578e-94	**
S4N-S4T	hsa-miR-1287	0.01	1.4334	7.1633	5.67857e-18	**
S4N-S4T	hsa-miR-1296	4.6029	8.2851	0.847976	1.46763e-10
S4N-S4T	hsa-miR-1298	1.305	0.3727	-1.80796	7.66648e-06	**
S4N-S4T	hsa-miR-1301	1.6608	1.1467	-0.53439	0.0610406
S4N-S4T	hsa-miR-1307-3p	6.0028	11.324	0.915676	1.24975e-15
S4N-S4T	hsa-miR-1307-5p	3.298	5.9917	0.861374	3.33446e-08
S4N-S4T	hsa-miR-130a-3p	233.112	209.651	-0.153036	5.84414e-12
S4N-S4T	hsa-miR-130b-3p	3.6301	4.1856	0.205425	0.217112
S4N-S4T	hsa-miR-130b-5p	2.6099	1.8061	-0.531117	0.0190149
S4N-S4T	hsa-miR-132-3p	2.5387	3.7555	0.564915	0.00256095
S4N-S4T	hsa-miR-132-5p	0.6169	1.9781	1.68101	7.47081e-08	**
S4N-S4T	hsa-miR-133a	110.826	313.946	1.50222	0	**
S4N-S4T	hsa-miR-133b	1.6846	6.6797	1.98738	8.51708e-29	**
S4N-S4T	hsa-miR-134	4.8402	6.995	0.531257	9.90687e-05
S4N-S4T	hsa-miR-135a-5p	0.6881	3.8415	2.48098	3.04036e-22	**
S4N-S4T	hsa-miR-136-3p	6.0502	26.6901	2.14125	4.28454e-121	**
S4N-S4T	hsa-miR-136-5p	0.9491	10.9226	3.52461	5.10129e-86	**
S4N-S4T	hsa-miR-139-3p	0.4745	1.0607	1.16054	0.00302882	**
S4N-S4T	hsa-miR-139-5p	1.4236	5.3036	1.89743	7.07882e-22	**
S4N-S4T	hsa-miR-140-3p	92.5093	126.284	0.448997	1.39594e-45
S4N-S4T	hsa-miR-140-5p	0.2373	4.8163	4.34314	2.60664e-45	**
S4N-S4T	hsa-miR-141-3p	180.107	1415.06	2.97394	0	**
S4N-S4T	hsa-miR-141-5p	1.5185	5.4756	1.85037	7.93679e-22	**
S4N-S4T	hsa-miR-142-3p	0.5457	7.6544	3.81011	9.3773e-65	**
S4N-S4T	hsa-miR-142-5p	38.6029	280.003	2.85866	0	**
S4N-S4T	hsa-miR-143-3p	386038	521205	0.433109	0
S4N-S4T	hsa-miR-143-5p	9.7516	30.1303	1.6275	3.61241e-94	**
S4N-S4T	hsa-miR-144-3p	0.1661	3.8702	4.54228	1.03557e-37	**
S4N-S4T	hsa-miR-144-5p	0.261	8.6865	5.05665	4.40905e-88	**
S4N-S4T	hsa-miR-145-3p	178.66	784.936	2.13536	0	**
S4N-S4T	hsa-miR-145-5p	2672.33	2059.35	-0.375907	0
S4N-S4T	hsa-miR-1468	12.6699	8.2851	-0.612814	3.38663e-09
S4N-S4T	hsa-miR-146a-5p	61.4277	311.251	2.34112	0	**
S4N-S4T	hsa-miR-146b-3p	7.4501	5.3896	-0.467082	0.000397795
S4N-S4T	hsa-miR-146b-5p	594.133	1070.41	0.849311	0
S4N-S4T	hsa-miR-148a-3p	4873.5	4541.74	-0.101715	5.81223e-99
S4N-S4T	hsa-miR-148a-5p	93.0788	54.8997	-0.761654	5.39479e-84
S4N-S4T	hsa-miR-148b-3p	13.2156	47.4173	1.84317	3.67305e-175	**
S4N-S4T	hsa-miR-148b-5p	0.2135	5.0456	4.56272	7.00367e-49	**
S4N-S4T	hsa-miR-149-5p	15.9916	14.4488	-0.146365	0.0850478
S4N-S4T	hsa-miR-150-5p	13.1444	52.0328	1.98497	3.31631e-212	**
S4N-S4T	hsa-miR-151a-3p	1142.5	685.515	-0.736933	0
S4N-S4T	hsa-miR-151a-5p	356.608	471.535	0.403025	1.95755e-135
S4N-S4T	hsa-miR-151b	34.5694	29.3563	-0.235825	5.77118e-05
S4N-S4T	hsa-miR-152	11.8158	36.7813	1.63826	1.27764e-115	**
S4N-S4T	hsa-miR-153	0.3322	1.3187	1.98899	8.56655e-07	**
S4N-S4T	hsa-miR-155-5p	10.9853	49.6534	2.17632	2.82791e-228	**
S4N-S4T	hsa-miR-15a-5p	5.0063	51.7175	3.36884	0	**
S4N-S4T	hsa-miR-15b-5p	2.7523	13.2161	2.26359	3.46047e-65	**
S4N-S4T	hsa-miR-16-2-3p	0.522	3.2682	2.64637	1.69743e-20	**
S4N-S4T	hsa-miR-16-5p	197.048	893.962	2.18167	0	**
S4N-S4T	hsa-miR-17-3p	0.8304	3.6122	2.121	1.40221e-17	**
S4N-S4T	hsa-miR-17-5p	1.3524	6.909	2.35295	1.70302e-36	**
S4N-S4T	hsa-miR-181a-2-3p	48.3782	25.3714	-0.931154	6.6065e-62
S4N-S4T	hsa-miR-181a-3p	16.0391	8.5718	-0.903923	1.17728e-20
S4N-S4T	hsa-miR-181a-5p	4240.72	3607.32	-0.23338	0
S4N-S4T	hsa-miR-181b-5p	175.006	150.594	-0.216739	6.76267e-17
S4N-S4T	hsa-miR-181c-3p	6.2163	20.9278	1.75129	4.41812e-73	**
S4N-S4T	hsa-miR-181c-5p	152.134	365.577	1.26484	0	**
S4N-S4T	hsa-miR-181d	28.0446	47.4173	0.757691	5.33104e-44
S4N-S4T	hsa-miR-182-5p	2876.19	926.471	-1.63434	0	**
S4N-S4T	hsa-miR-183-5p	227.394	286.51	0.333392	9.78606e-59
S4N-S4T	hsa-miR-184	6.1451	10.9799	0.837357	2.90081e-13
S4N-S4T	hsa-miR-185-5p	0.261	1.7488	2.74424	5.08973e-12	**
S4N-S4T	hsa-miR-186-5p	220.015	989.14	2.16857	0	**
S4N-S4T	hsa-miR-187-3p	2.7997	16.7996	2.58508	2.64345e-96	**
S4N-S4T	hsa-miR-190a	0.6643	1.1754	0.823245	0.0188233
S4N-S4T	hsa-miR-190b	0.522	1.1181	1.09893	0.00356718	**
S4N-S4T	hsa-miR-191-5p	5980.55	5390.43	-0.149879	6.55658e-256
S4N-S4T	hsa-miR-192-5p	299.926	254.345	-0.237821	6.3446e-33
S4N-S4T	hsa-miR-193a-5p	1.2338	2.0354	0.722204	0.00573749
S4N-S4T	hsa-miR-193b-3p	12.2666	21.6445	0.819265	8.44647e-24
S4N-S4T	hsa-miR-194-5p	2.6811	4.1856	0.642609	0.000351757
S4N-S4T	hsa-miR-195-3p	11.3887	6.7084	-0.763562	1.06199e-11
S4N-S4T	hsa-miR-195-5p	31.0816	148.473	2.25607	0	**
S4N-S4T	hsa-miR-196a-5p	0.5694	2.6661	2.22722	4.13587e-14	**
S4N-S4T	hsa-miR-196b-5p	38.0335	107.85	1.50368	1.39841e-295	**
S4N-S4T	hsa-miR-197-3p	5.7418	4.3002	-0.417099	0.00513558
S4N-S4T	hsa-miR-199a-3p	281.965	1560.5	2.46842	0	**
S4N-S4T	hsa-miR-199a-5p	56.1842	269.911	2.26425	0	**
S4N-S4T	hsa-miR-199b-3p	281.87	1560.13	2.46856	0	**
S4N-S4T	hsa-miR-199b-5p	27.0007	197.725	2.87243	0	**
S4N-S4T	hsa-miR-19a-3p	1.7558	3.9849	1.18241	4.80491e-09	**
S4N-S4T	hsa-miR-19b-3p	16.7271	38.9028	1.21769	2.07198e-78	**
S4N-S4T	hsa-miR-200a-3p	7.0467	35.3766	2.32778	2.08807e-177	**
S4N-S4T	hsa-miR-200a-5p	1.4236	1.2614	-0.174518	0.551633
S4N-S4T	hsa-miR-200b-3p	34.2372	67.3703	0.976548	2.61983e-94
S4N-S4T	hsa-miR-200b-5p	7.0705	1.7488	-2.01545	1.04078e-29	**
S4N-S4T	hsa-miR-200c-3p	37.8674	60.8627	0.684602	4.01354e-47
S4N-S4T	hsa-miR-203a	19.2184	27.8655	0.535992	4.83063e-15
S4N-S4T	hsa-miR-204-5p	585.711	518.522	-0.175782	9.22032e-36
S4N-S4T	hsa-miR-205-5p	478.467	478.731	0.0007949	0.957469
S4N-S4T	hsa-miR-208b	0.01	1.2901	7.01134	2.98204e-16	**
S4N-S4T	hsa-miR-20a-5p	1.1863	7.7118	2.7006	2.52601e-47	**
S4N-S4T	hsa-miR-20b-5p	2.5625	4.7016	0.8756	7.02719e-07
S4N-S4T	hsa-miR-210	3.7962	4.4722	0.236429	0.144403
S4N-S4T	hsa-miR-212-3p	1.3287	2.4941	0.908504	0.000194708
S4N-S4T	hsa-miR-212-5p	2.3252	4.9309	1.0845	1.2509e-09	**
S4N-S4T	hsa-miR-21-3p	45.2463	138.124	1.61009	0	**
S4N-S4T	hsa-miR-214-3p	9.4194	15.6815	0.735356	6.51259e-15
S4N-S4T	hsa-miR-214-5p	1.6608	10.6072	2.67509	8.24467e-64	**
S4N-S4T	hsa-miR-215	2.1354	0.9461	-1.17444	2.89288e-05	**
S4N-S4T	hsa-miR-21-5p	1463.14	2432.99	0.733663	0
S4N-S4T	hsa-miR-218-1-3p	2.776	8.6865	1.64577	8.3397e-29	**
S4N-S4T	hsa-miR-218-5p	3.2268	29.7863	3.20647	2.51688e-212	**
S4N-S4T	hsa-miR-221-3p	320.639	797.894	1.31525	0	**
S4N-S4T	hsa-miR-221-5p	30.441	40.1642	0.399894	7.11788e-13
S4N-S4T	hsa-miR-222-3p	375.613	359.729	-0.0623365	0.000297948
S4N-S4T	hsa-miR-223-3p	0.8067	11.0086	3.77045	1.13792e-91	**
S4N-S4T	hsa-miR-22-3p	1634.11	5899.18	1.85201	0	**
S4N-S4T	hsa-miR-224-5p	3.7962	6.7944	0.83979	8.66208e-09
S4N-S4T	hsa-miR-22-5p	0.1424	3.3255	4.54555	1.32485e-32	**
S4N-S4T	hsa-miR-23a-3p	71.4165	161.115	1.17377	1.80877e-300	**
S4N-S4T	hsa-miR-23b-3p	173.654	410.242	1.24026	0	**
S4N-S4T	hsa-miR-24-1-5p	0.01	1.5194	7.24736	5.27321e-19	**
S4N-S4T	hsa-miR-24-2-5p	0.4033	2.2075	2.45249	3.20271e-13	**
S4N-S4T	hsa-miR-24-3p	85.3677	290.811	1.76832	0	**
S4N-S4T	hsa-miR-25-3p	560.228	394.159	-0.507235	9.16137e-242
S4N-S4T	hsa-miR-26a-5p	4696.03	19636.5	2.06403	0	**
S4N-S4T	hsa-miR-26b-3p	4.6267	8.0844	0.805157	1.40654e-09
S4N-S4T	hsa-miR-26b-5p	243.837	1285.43	2.39826	0	**
S4N-S4T	hsa-miR-27a-3p	75.6636	453.331	2.58289	0	**
S4N-S4T	hsa-miR-27a-5p	0.8067	4.3002	2.4143	5.51943e-24	**
S4N-S4T	hsa-miR-27b-3p	6530.06	22132.2	1.76098	0	**
S4N-S4T	hsa-miR-27b-5p	55.1402	64.6469	0.229477	7.56253e-08
S4N-S4T	hsa-miR-28-3p	1932.78	785.768	-1.2985	0	**
S4N-S4T	hsa-miR-28-5p	43.0397	176.396	2.03507	0	**
S4N-S4T	hsa-miR-299-3p	0.4745	1.4047	1.56578	1.71411e-05	**
S4N-S4T	hsa-miR-29a-3p	57.6789	357.665	2.63249	0	**
S4N-S4T	hsa-miR-29b-3p	2.2066	10.8653	2.29983	6.15048e-55	**
S4N-S4T	hsa-miR-29c-3p	9.8939	99.4501	3.32936	0	**
S4N-S4T	hsa-miR-29c-5p	1.6371	3.8129	1.21975	4.38295e-09	**
S4N-S4T	hsa-miR-301a-3p	4.8165	20.7558	2.10746	1.07373e-92	**
S4N-S4T	hsa-miR-301b	0.01	1.1754	6.87701	7.0914e-15	**
S4N-S4T	hsa-miR-30a-3p	296.153	218.022	-0.441871	1.84357e-100
S4N-S4T	hsa-miR-30a-5p	3623.69	8809.52	1.2816	0	**
S4N-S4T	hsa-miR-30b-5p	32.1019	94.4905	1.55751	4.81766e-273	**
S4N-S4T	hsa-miR-30c-1-3p	4.6029	6.135	0.41452	0.0037055
S4N-S4T	hsa-miR-30c-2-3p	41.2128	13.5887	-1.60069	4.88517e-121	**
S4N-S4T	hsa-miR-30c-5p	99.2951	223.182	1.16843	0	**
S4N-S4T	hsa-miR-30d-3p	4.4131	10.5786	1.26128	9.39614e-24	**
S4N-S4T	hsa-miR-30d-5p	823.402	1529.36	0.893264	0
S4N-S4T	hsa-miR-30e-3p	175.67	83.8833	-1.06642	3.20067e-274	**
S4N-S4T	hsa-miR-30e-5p	116.805	656.56	2.49082	0	**
S4N-S4T	hsa-miR-31-5p	6.5248	9.0592	0.47345	6.69589e-05
S4N-S4T	hsa-miR-320a	103.376	102.116	-0.0176895	0.588197
S4N-S4T	hsa-miR-320b	14.0698	13.0154	-0.112382	0.212579
S4N-S4T	hsa-miR-324-3p	0.9016	1.8061	1.00232	0.000581692	**
S4N-S4T	hsa-miR-324-5p	1.4948	1.9781	0.404163	0.106864
S4N-S4T	hsa-miR-32-5p	0.2373	1.5481	2.70571	1.20244e-10	**
S4N-S4T	hsa-miR-328	35.3998	27.8655	-0.345261	5.08362e-09
S4N-S4T	hsa-miR-330-3p	0.7355	1.0894	0.566737	0.103096
S4N-S4T	hsa-miR-330-5p	0.3322	2.5801	2.9573	2.21816e-18	**
S4N-S4T	hsa-miR-331-3p	1.0914	1.9781	0.857935	0.00158002
S4N-S4T	hsa-miR-331-5p	0.3559	1.0607	1.57547	0.000179269	**
S4N-S4T	hsa-miR-335-3p	4.7216	5.3896	0.190902	0.192123
S4N-S4T	hsa-miR-335-5p	2.776	6.307	1.18395	1.63686e-13	**
S4N-S4T	hsa-miR-338-3p	1.993	14.6208	2.87501	2.63209e-94	**
S4N-S4T	hsa-miR-338-5p	0.7118	1.2041	0.758411	0.0267122
S4N-S4T	hsa-miR-339-3p	1.1151	5.5616	2.31833	3.51576e-29	**
S4N-S4T	hsa-miR-339-5p	2.0642	2.4081	0.222313	0.3112
S4N-S4T	hsa-miR-340-3p	0.5457	2.0354	1.89913	2.80974e-09	**
S4N-S4T	hsa-miR-340-5p	33.1458	27.5215	-0.268267	8.4166e-06
S4N-S4T	hsa-miR-342-3p	178.565	154.034	-0.213198	1.01499e-16
S4N-S4T	hsa-miR-342-5p	3.4878	2.9242	-0.254275	0.172909
S4N-S4T	hsa-miR-345-5p	8.2805	36.81	2.15231	2.24721e-167	**
S4N-S4T	hsa-miR-34a-5p	6.0502	34.1439	2.49657	3.46594e-186	**
S4N-S4T	hsa-miR-34c-5p	2.2303	8.9732	2.00838	1.21152e-38	**
S4N-S4T	hsa-miR-3605-3p	3.2031	1.5768	-1.02247	4.3737e-06	**
S4N-S4T	hsa-miR-3605-5p	2.9658	1.6341	-0.859925	0.000131399
S4N-S4T	hsa-miR-3607-3p	10.8904	0.7454	-3.8689	7.41065e-87	**
S4N-S4T	hsa-miR-3613-5p	0.1661	1.0607	2.67489	1.31349e-07	**
S4N-S4T	hsa-miR-361-3p	8.1619	12.6427	0.631328	9.70573e-10
S4N-S4T	hsa-miR-3615	3.3454	1.4621	-1.19414	1.04639e-07	**
S4N-S4T	hsa-miR-361-5p	37.2268	73.7347	0.986002	1.12246e-104
S4N-S4T	hsa-miR-362-5p	0.9491	2.0641	1.12088	5.5484e-05	**
S4N-S4T	hsa-miR-363-3p	62.4954	141.764	1.18167	1.75283e-267	**
S4N-S4T	hsa-miR-3651	3.986	0.86	-2.21253	2.3198e-19	**
S4N-S4T	hsa-miR-365a-3p	6.5485	14.1048	1.10695	1.44218e-25	**
S4N-S4T	hsa-miR-365b-3p	6.5485	14.1048	1.10695	1.44218e-25	**
S4N-S4T	hsa-miR-369-5p	0.1661	2.6375	3.98905	5.03979e-24	**
S4N-S4T	hsa-miR-370	0.8304	2.0354	1.29343	7.29447e-06	**
S4N-S4T	hsa-miR-374a-3p	7.1417	6.8517	-0.0598055	0.636365
S4N-S4T	hsa-miR-374a-5p	4.0098	22.9059	2.51412	1.48927e-126	**
S4N-S4T	hsa-miR-374b-3p	0.2135	1.6054	2.91062	9.11722e-12	**
S4N-S4T	hsa-miR-374b-5p	13.7851	38.3581	1.47642	1.37562e-103	**
S4N-S4T	hsa-miR-375	4190.73	1389.69	-1.59243	0	**
S4N-S4T	hsa-miR-376c-3p	0.01	1.2901	7.01134	2.98204e-16	**
S4N-S4T	hsa-miR-377-3p	0.2847	1.0607	1.8975	1.9558e-05	**
S4N-S4T	hsa-miR-378a-3p	455.073	347.975	-0.387114	1.981e-120
S4N-S4T	hsa-miR-378a-5p	0.8067	2.0354	1.33521	4.28512e-06	**
S4N-S4T	hsa-miR-378c	5.6232	13.2161	1.23283	2.70063e-28	**
S4N-S4T	hsa-miR-378d	1.9218	3.1248	0.701306	0.000849718
S4N-S4T	hsa-miR-379-5p	0.9016	2.2648	1.32882	1.34814e-06	**
S4N-S4T	hsa-miR-381-3p	23.6552	52.6062	1.15308	1.03667e-96	**
S4N-S4T	hsa-miR-382-5p	0.783	3.0675	1.96998	6.94812e-14	**
S4N-S4T	hsa-miR-383	0.4983	1.4621	1.55296	1.29542e-05	**
S4N-S4T	hsa-miR-3909	0.01	1.1754	6.87701	7.0914e-15	**
S4N-S4T	hsa-miR-409-3p	74.5484	52.4342	-0.507669	8.35437e-34
S4N-S4T	hsa-miR-409-5p	4.2945	8.8011	1.03519	5.57673e-15	**
S4N-S4T	hsa-miR-410	15.3747	20.7271	0.43096	3.24094e-08
S4N-S4T	hsa-miR-411-5p	19.0049	59.2286	1.63992	2.9896e-185	**
S4N-S4T	hsa-miR-421	11.8158	19.1217	0.694493	2.74144e-16
S4N-S4T	hsa-miR-423-3p	98.6545	124.133	0.331436	3.77823e-26
S4N-S4T	hsa-miR-423-5p	115.31	69.2338	-0.735974	9.73441e-98
S4N-S4T	hsa-miR-424-3p	0.1186	3.4402	4.85832	5.80286e-35	**
S4N-S4T	hsa-miR-424-5p	0.2847	16.1115	5.8225	7.0597e-173	**
S4N-S4T	hsa-miR-425-3p	2.6574	5.705	1.10221	3.5769e-11	**
S4N-S4T	hsa-miR-425-5p	4.2708	14.6781	1.78109	5.45509e-53	**
S4N-S4T	hsa-miR-4286	1.2812	0.2867	-2.15988	6.48176e-07	**
S4N-S4T	hsa-miR-429	6.3587	28.4962	2.16397	6.71721e-131	**
S4N-S4T	hsa-miR-431-3p	0.1898	1.0321	2.44303	7.76217e-07	**
S4N-S4T	hsa-miR-432-5p	11.0328	10.5499	-0.0645697	0.524028
S4N-S4T	hsa-miR-4449	1.3761	0.8887	-0.630817	0.0482558
S4N-S4T	hsa-miR-4454	2.8946	2.8095	-0.0430506	0.832807
S4N-S4T	hsa-miR-4485	0.6406	19.1217	4.89964	7.77533e-189	**
S4N-S4T	hsa-miR-449a	0.01	1.1181	6.80491	3.45813e-14	**
S4N-S4T	hsa-miR-450a-5p	0.6643	3.8415	2.53176	9.75464e-23	**
S4N-S4T	hsa-miR-450b-5p	0.522	7.0811	3.76185	2.0147e-59	**
S4N-S4T	hsa-miR-451a	10.1549	178.087	4.13234	0	**
S4N-S4T	hsa-miR-452-5p	1.1863	2.8382	1.25851	2.12958e-07	**
S4N-S4T	hsa-miR-454-3p	2.9658	12.1267	2.03169	2.10546e-52	**
S4N-S4T	hsa-miR-454-5p	0.2847	1.9208	2.75419	4.06412e-13	**
S4N-S4T	hsa-miR-455-3p	1.3999	1.3761	-0.0247385	0.939785
S4N-S4T	hsa-miR-455-5p	1.2338	10.8939	3.14234	2.84785e-77	**
S4N-S4T	hsa-miR-4677-3p	2.3964	0.9174	-1.38525	4.71902e-07	**
S4N-S4T	hsa-miR-4770	0.3084	2.4368	2.98211	1.43161e-17	**
S4N-S4T	hsa-miR-484	10.5345	21.5872	1.03505	1.93872e-34	**
S4N-S4T	hsa-miR-486-5p	3037.91	1346.49	-1.17387	0	**
S4N-S4T	hsa-miR-487b	1.21	4.2429	1.81004	8.87066e-17	**
S4N-S4T	hsa-miR-490-3p	0.01	3.1248	8.28762	2.85109e-38	**
S4N-S4T	hsa-miR-493-3p	0.9016	2.8095	1.63975	2.88662e-10	**
S4N-S4T	hsa-miR-493-5p	1.8032	20.1824	3.48447	6.41397e-156	**
S4N-S4T	hsa-miR-497-5p	8.85	62.6401	2.82334	0	**
S4N-S4T	hsa-miR-499a-5p	0.261	1.5481	2.56838	4.01518e-10	**
S4N-S4T	hsa-miR-500a-3p	74.1213	118.658	0.678847	8.0391e-89
S4N-S4T	hsa-miR-501-3p	132.631	125.022	-0.0852305	0.00343369
S4N-S4T	hsa-miR-502-3p	3.9623	14.7928	1.90049	3.05013e-58	**
S4N-S4T	hsa-miR-504	5.9791	4.6729	-0.35561	0.0138496
S4N-S4T	hsa-miR-505-3p	0.1898	2.5801	3.76488	1.45399e-22	**
S4N-S4T	hsa-miR-509-3p	1.9456	0.688	-1.49973	1.53151e-06	**
S4N-S4T	hsa-miR-532-3p	0.7118	1.6054	1.17339	0.000227983	**
S4N-S4T	hsa-miR-532-5p	114.243	172.755	0.596624	2.20455e-102
S4N-S4T	hsa-miR-539-3p	0.2373	1.4334	2.59466	1.45895e-09	**
S4N-S4T	hsa-miR-542-3p	1.8507	4.3576	1.23546	2.30349e-10	**
S4N-S4T	hsa-miR-548k	0.5457	2.0928	1.93925	9.84438e-10	**
S4N-S4T	hsa-miR-561-5p	0.2135	1.3474	2.65787	2.84063e-09	**
S4N-S4T	hsa-miR-5683	0.6169	1.9208	1.6386	1.95248e-07	**
S4N-S4T	hsa-miR-574-3p	16.8695	41.3109	1.29211	3.96992e-91	**
S4N-S4T	hsa-miR-574-5p	1.3524	5.4183	2.00232	7.12282e-24	**
S4N-S4T	hsa-miR-577	0.1898	1.1754	2.6306	3.59904e-08	**
S4N-S4T	hsa-miR-582-3p	7.4264	15.2228	1.0355	8.66424e-25	**
S4N-S4T	hsa-miR-582-5p	0.5694	2.9242	2.36053	2.28806e-16	**
S4N-S4T	hsa-miR-584-5p	0.3322	1.0607	1.67489	9.01294e-05	**
S4N-S4T	hsa-miR-589-5p	7.0705	7.9984	0.177899	0.138184
S4N-S4T	hsa-miR-598	1.7558	3.3829	0.946132	7.07777e-06
S4N-S4T	hsa-miR-625-3p	1.305	0.4874	-1.42087	0.000165542	**
S4N-S4T	hsa-miR-628-3p	0.8779	2.0928	1.25331	9.11226e-06	**
S4N-S4T	hsa-miR-628-5p	0.6881	1.9208	1.48102	1.35816e-06	**
S4N-S4T	hsa-miR-629-5p	0.9491	2.9815	1.65141	6.60093e-11	**
S4N-S4T	hsa-miR-641	0.522	1.1181	1.09893	0.00356718	**
S4N-S4T	hsa-miR-6510-3p	2.4675	1.4334	-0.783609	0.00129239
S4N-S4T	hsa-miR-6511a-3p	1.0914	0.516	-1.08074	0.00550642	**
S4N-S4T	hsa-miR-652-3p	0.4033	4.3862	3.44305	9.08603e-35	**
S4N-S4T	hsa-miR-654-3p	12.1005	27.0915	1.16277	2.33683e-51	**
S4N-S4T	hsa-miR-660-5p	11.9581	59.6299	2.31805	3.86946e-296	**
S4N-S4T	hsa-miR-664a-3p	16.3712	13.2734	-0.302622	0.000452907
S4N-S4T	hsa-miR-664a-5p	1.6371	0.86	-0.928734	0.00255534
S4N-S4T	hsa-miR-671-3p	17.6762	9.9192	-0.833512	6.51693e-20
S4N-S4T	hsa-miR-708-5p	0.3796	2.2075	2.53986	1.03455e-13	**
S4N-S4T	hsa-miR-744-5p	23.3468	31.019	0.409927	1.08289e-10
S4N-S4T	hsa-miR-769-5p	45.4598	61.2927	0.431124	1.94263e-21
S4N-S4T	hsa-miR-873-3p	1.7083	3.1822	0.897463	3.09938e-05
S4N-S4T	hsa-miR-873-5p	0.01	4.0709	8.6692	1.26242e-49	**
S4N-S4T	hsa-miR-874	7.7585	11.4386	0.560061	1.77198e-07
S4N-S4T	hsa-miR-887	3.4403	11.7253	1.76902	2.7731e-42	**
S4N-S4T	hsa-miR-889	3.3692	7.0811	1.07157	5.62773e-13	**
S4N-S4T	hsa-miR-891a	1.3524	0.7454	-0.859435	0.0103763
S4N-S4T	hsa-miR-92a-3p	1102.71	1280.81	0.216005	7.44455e-113
S4N-S4T	hsa-miR-92b-3p	368.163	176.682	-1.05919	0	**
S4N-S4T	hsa-miR-93-5p	38.9113	91.3657	1.23146	8.98755e-185	**
S4N-S4T	hsa-miR-941	56.9909	64.7902	0.185044	1.22123e-05
S4N-S4T	hsa-miR-9-5p	18.649	5.9343	-1.65195	3.16352e-58	**
S4N-S4T	hsa-miR-96-5p	3.4878	10.3779	1.57313	4.9821e-32	**
S4N-S4T	hsa-miR-98-5p	95.0243	152.544	0.682854	8.35962e-115
S4N-S4T	hsa-miR-99a-3p	6.335	16.0542	1.34153	1.35891e-38	**
S4N-S4T	hsa-miR-99a-5p	2480.03	5030.04	1.02021	0	**
S4N-S4T	hsa-miR-99b-3p	2.7523	4.9883	0.857911	5.12574e-07
S4N-S4T	hsa-miR-99b-5p	14342.8	12541.2	-0.19365	0

[truncated: 1 more sheets: S5N-S5T]
