# Supplementary material for: Prostate cancer small non-coding RNA transcriptome in Arabs
Source: J Transl Med. 2017 Dec 21;15:260. doi: 10.1186/s12967-017-1362-x (PMC5740966; doi:10.1186/s12967-017-1362-x)
Supplement: Supplementary file 4 — Additional file 4. miRNA editing summary. [file 12967_2017_1362_MOESM4_ESM.xlsx]

## Sheet: Table description
Table S6 miRNA editing summary

## Sheet: Q1
N				T
miRNA	Count with base edit	Count without base edit	Count with base edit/Total	miRNA	Count with base edit	Count without base edit	Count with base edit/Total
hsa-let-7a-5p	911905	250467	0.784521	hsa-let-7a-5p	1126346	591696	0.655599
hsa-let-7b-5p	167807	95159	0.638132	hsa-let-7b-5p	190172	99227	0.657127
hsa-let-7c	95455	173818	0.354492	hsa-let-7c	121933	196540	0.382868
hsa-let-7d-3p	120	4277	0.027291	hsa-let-7d-3p	52	2018	0.025121
hsa-let-7d-5p	383	13263	0.028067	hsa-let-7d-5p	743	17120	0.041594
hsa-let-7e-5p	240370	87935	0.732155	hsa-let-7e-5p	557205	44596	0.925896
hsa-let-7f-2-3p	39	0	1	hsa-let-7f-2-3p	10	0	1
hsa-let-7f-5p	496331	206226	0.706464	hsa-let-7f-5p	1156585	313089	0.786967
hsa-let-7g-5p	405	39718	0.010094	hsa-let-7g-5p	584	51231	0.011271
hsa-let-7i-5p	614	78350	0.007776	hsa-let-7i-5p	312	43120	0.007184
hsa-miR-100-5p	218449	661550	0.248238	hsa-miR-100-5p	217921	530190	0.291295
hsa-miR-103a-3p	809	16943	0.045572	hsa-miR-101-3p	16	5192	0.003072
hsa-miR-106b-3p	5	1627	0.003064	hsa-miR-103a-3p	1126	25327	0.042566
hsa-miR-107	140	5200	0.026217	hsa-miR-107	60	3605	0.016371
hsa-miR-10a-5p	1555149	177281	0.897669	hsa-miR-10a-5p	2673187	326198	0.891245
hsa-miR-10b-5p	213718	1631778	0.115805	hsa-miR-10b-5p	387804	2784912	0.122231
hsa-miR-1180	11	1189	0.009167	hsa-miR-1180	8	499	0.015779
hsa-miR-1247-3p	24	299	0.074303
hsa-miR-1247-5p	21	1898	0.010943	hsa-miR-1247-5p	5	767	0.006477
hsa-miR-125a-3p	7	289	0.023649	hsa-miR-125a-3p	7	146	0.045752
hsa-miR-125a-5p	7036	354588	0.019457	hsa-miR-125a-5p	20620	1325493	0.015318
hsa-miR-125b-1-3p	275	10051	0.026632	hsa-miR-125b-1-3p	78	2449	0.030867
hsa-miR-125b-2-3p	876	30240	0.028153	hsa-miR-125b-2-3p	931	22226	0.040204
hsa-miR-125b-5p	11984	123365	0.088541	hsa-miR-125b-5p	24183	281809	0.079031
hsa-miR-126-3p	20	3317	0.005993	hsa-miR-126-3p	17	2493	0.006773
hsa-miR-126-5p	160	29719	0.005355	hsa-miR-126-5p	68	12942	0.005227
hsa-miR-1260a	74	0	1	hsa-miR-1260a	110	2	0.982143
hsa-miR-1260b	13	10	0.565217	hsa-miR-1260b	7	1	0.875
hsa-miR-127-3p	1022	105132	0.009628	hsa-miR-127-3p	448	42584	0.010411
hsa-miR-1271-5p	50	1580	0.030675	hsa-miR-1271-5p	46	1567	0.028518
hsa-miR-1290	6	0	1
hsa-miR-1296	20	1722	0.011481	hsa-miR-1296	12	971	0.012208
hsa-miR-1301	35	448	0.072464	hsa-miR-1301	13	258	0.04797
hsa-miR-1304-3p	24	90	0.210526	hsa-miR-1304-3p	82	176	0.317829
hsa-miR-1307-3p	6	1345	0.004441
hsa-miR-1307-5p	9	552	0.016043
hsa-miR-130a-3p	72	13819	0.005183	hsa-miR-130a-3p	47	9941	0.004706
hsa-miR-132-3p					6	487	0.01217
hsa-miR-133a	744	12956	0.054307	hsa-miR-133a	1314	14343	0.083924
hsa-miR-133b	6	313	0.018809
hsa-miR-135a-5p	14	11	0.56
hsa-miR-135b-5p	10	7	0.588235	hsa-miR-135b-5p	81	2	0.975904
hsa-miR-136-5p	5	68	0.068493
hsa-miR-139-3p	6	123	0.046512	hsa-miR-139-3p	6	55	0.098361
hsa-miR-139-5p	25	318	0.072886	hsa-miR-139-5p	15	131	0.10274
hsa-miR-140-3p	363	6544	0.052555	hsa-miR-140-3p	212	4614	0.043929
hsa-miR-141-3p	282	8944	0.030566	hsa-miR-141-3p	1624	43171	0.036254
hsa-miR-142-5p	665	5978	0.100105	hsa-miR-142-5p	131	1168	0.100847
hsa-miR-143-3p	178797	10745260	0.016367	hsa-miR-143-3p	81053	4977254	0.016024
hsa-miR-143-5p	438	2682	0.140385	hsa-miR-143-5p	237	1730	0.120488
hsa-miR-145-3p	169	26244	0.006398	hsa-miR-145-3p	183	17945	0.010095
hsa-miR-145-5p	2007	50519	0.03821	hsa-miR-145-5p	1870	46799	0.038423
hsa-miR-1468					6	2641	0.002267
hsa-miR-146a-5p	804	6434	0.11108	hsa-miR-146a-5p	1134	10145	0.100541
hsa-miR-146b-3p	11	892	0.012182	hsa-miR-146b-3p	12	573	0.020513
hsa-miR-146b-5p	6560	55064	0.106452	hsa-miR-146b-5p	5124	41256	0.110479
hsa-miR-147a	6	0	1
hsa-miR-148a-3p	337	34824	0.009584	hsa-miR-148a-3p	1841	167227	0.010889
hsa-miR-148a-5p					78	4229	0.01811
hsa-miR-148b-3p	23	677	0.032857	hsa-miR-148b-3p	120	1097	0.098603
hsa-miR-149-5p	8	758	0.010444	hsa-miR-149-5p	19	2225	0.008467
hsa-miR-150-3p	33	289	0.102484	hsa-miR-150-5p	12	1898	0.006283
hsa-miR-150-5p	53	10991	0.004799
hsa-miR-151a-3p	664	44967	0.014552	hsa-miR-151a-3p	1098	59447	0.018135
hsa-miR-151a-5p	1083	48381	0.021895	hsa-miR-151a-5p	1499	72506	0.020255
hsa-miR-151b	63	3068	0.020121	hsa-miR-151b	75	3601	0.020403
hsa-miR-155-5p	8	4059	0.001967	hsa-miR-155-5p	22	6159	0.003559
hsa-miR-15a-5p	10	999	0.009911	hsa-miR-15a-5p	11	1001	0.01087
hsa-miR-15b-5p	9	936	0.009524
hsa-miR-16-5p	328	24441	0.013242	hsa-miR-16-5p	377	27939	0.013314
hsa-miR-17-3p					9	60	0.130435
hsa-miR-181a-5p	3168	182370	0.017075	hsa-miR-181a-5p	5444	293608	0.018204
hsa-miR-181b-5p	9201	13280	0.409279	hsa-miR-181b-5p	5138	12951	0.28404
hsa-miR-181c-5p	93	7351	0.012493	hsa-miR-181c-5p	119	10404	0.011309
hsa-miR-181d	13052	4515	0.742984	hsa-miR-181d	12699	2510	0.834966
hsa-miR-182-5p	3159	51545	0.057747	hsa-miR-182-5p	10100	163328	0.058237
hsa-miR-183-5p	506	11748	0.041293	hsa-miR-183-5p	1853	38510	0.045908
hsa-miR-185-5p					11	40	0.215686
hsa-miR-186-5p	4266	29215	0.127416	hsa-miR-186-5p	4742	36218	0.115771
hsa-miR-191-5p	9700	642029	0.014883	hsa-miR-191-5p	19325	1421793	0.01341
hsa-miR-192-5p					14	4916	0.00284
hsa-miR-193b-3p	5	2811	0.001776	hsa-miR-193b-3p	6	2287	0.002617
hsa-miR-195-3p	78	722	0.0975	hsa-miR-195-3p	83	581	0.125
hsa-miR-195-5p	18	3075	0.00582	hsa-miR-195-5p	12	3387	0.00353
hsa-miR-196a-5p	5439	266	0.953374	hsa-miR-196a-5p	8886	219	0.975947
hsa-miR-196b-5p	695	3677	0.158966	hsa-miR-196b-5p	969	6186	0.13543
hsa-miR-199a-3p	7806	37841	0.171008	hsa-miR-199a-3p	4946	24515	0.167883
hsa-miR-199a-5p	32	3536	0.008969	hsa-miR-199a-5p	34	2672	0.012565
hsa-miR-199b-3p	3903	37831	0.093521	hsa-miR-199b-3p	2472	24501	0.091647
hsa-miR-19a-3p	1645	97	0.944317	hsa-miR-19a-3p	2048	171	0.922938
hsa-miR-19b-3p	588	1722	0.254545	hsa-miR-19b-3p	819	2236	0.268085
hsa-miR-200a-3p	7845	449	0.945864	hsa-miR-200a-3p	38999	2152	0.947705
hsa-miR-200b-3p	77	2816	0.026616	hsa-miR-200b-3p	722	18423	0.037712
hsa-miR-200b-5p					24	684	0.033898
hsa-miR-200c-3p	11	2643	0.004145	hsa-miR-200c-3p	192	21817	0.008724
hsa-miR-203a	22	554	0.038194	hsa-miR-203a	74	1850	0.038462
hsa-miR-204-5p	314	20364	0.015185	hsa-miR-204-5p	66	5452	0.011961
hsa-miR-205-5p	103	4687	0.021503	hsa-miR-205-5p	3300	105885	0.030224
hsa-miR-20a-5p					38	460	0.076305
hsa-miR-21-3p	69	10787	0.006356	hsa-miR-21-3p	28	3855	0.007211
hsa-miR-21-5p	2148	174235	0.012178	hsa-miR-21-5p	1080	76365	0.013945
hsa-miR-210					8	161	0.047337
hsa-miR-214-3p	198	2181	0.083228	hsa-miR-214-3p	123	1446	0.078394
hsa-miR-214-5p	6	235	0.024896
hsa-miR-22-3p	3224	491861	0.006512	hsa-miR-22-3p	2968	427653	0.006892
hsa-miR-221-3p	412	63987	0.006398	hsa-miR-221-3p	162	28206	0.005711
hsa-miR-221-5p	16	2946	0.005402	hsa-miR-221-5p	9	2191	0.004091
hsa-miR-222-3p	1375	80424	0.016809	hsa-miR-222-3p	1231	63170	0.019115
hsa-miR-23a-3p	912	6709	0.119669	hsa-miR-23a-3p	1179	8158	0.126272
hsa-miR-23b-3p	2606	18150	0.125554	hsa-miR-23b-3p	2989	19736	0.131529
hsa-miR-23c	15006	0	1	hsa-miR-23c	16766	1	0.99994
hsa-miR-24-2-5p	5	116	0.041322
hsa-miR-24-3p	430	14313	0.029166	hsa-miR-24-3p	216	7519	0.027925
hsa-miR-25-3p	438	14166	0.029992	hsa-miR-25-3p	994	22084	0.043071
hsa-miR-26a-5p	9587	456366	0.020575	hsa-miR-26a-5p	12906	603891	0.020924
hsa-miR-26b-5p	170	21601	0.007809	hsa-miR-26b-5p	338	38836	0.008628
hsa-miR-27a-3p	906	7678	0.105545	hsa-miR-27a-3p	291	2938	0.090121
hsa-miR-27b-3p	55479	484869	0.102673	hsa-miR-27b-3p	44599	381664	0.104628
hsa-miR-27b-5p	5	1980	0.002519	hsa-miR-27b-5p	5	1645	0.00303
hsa-miR-28-3p	1265	130085	0.009631	hsa-miR-28-3p	1067	111565	0.009473
hsa-miR-28-5p	8	3370	0.002368	hsa-miR-28-5p	20	3681	0.005404
hsa-miR-29a-3p	1130	7550	0.130184	hsa-miR-29a-3p	1659	8675	0.160538
hsa-miR-29b-3p	26	282	0.084416	hsa-miR-29b-3p	16	173	0.084656
hsa-miR-29c-3p	4552	1190	0.792755	hsa-miR-29c-3p	5653	1590	0.780478
hsa-miR-3065-3p					6	49	0.109091
hsa-miR-30a-3p	1475	3098	0.322545	hsa-miR-30a-3p	2128	3298	0.392186
hsa-miR-30a-5p	66785	95547	0.41141	hsa-miR-30a-5p	118667	103654	0.533764
hsa-miR-30b-3p	6	25	0.193548
hsa-miR-30b-5p	138	1211	0.102298	hsa-miR-30b-5p	129	897	0.125731
hsa-miR-30c-1-3p	64	610	0.094955	hsa-miR-30c-1-3p	49	543	0.08277
hsa-miR-30c-2-3p	90	831	0.09772	hsa-miR-30c-2-3p	108	1044	0.09375
hsa-miR-30c-5p	396	2313	0.146179	hsa-miR-30c-5p	396	1957	0.168296
hsa-miR-30d-3p	8	109	0.068376	hsa-miR-30d-3p	15	187	0.074257
hsa-miR-30d-5p	102294	45284	0.693152	hsa-miR-30d-5p	117954	92827	0.559605
hsa-miR-30e-3p	2602	1327	0.662255	hsa-miR-30e-3p	2932	1994	0.595209
hsa-miR-30e-5p	98919	6883	0.934945	hsa-miR-30e-5p	107306	10169	0.913437
hsa-miR-31-5p	71	724	0.089308	hsa-miR-31-5p	140	1212	0.10355
hsa-miR-3130-5p					16	0	1
hsa-miR-320a	307	55836	0.005468	hsa-miR-320a	72	16040	0.004469
hsa-miR-320b	26	8103	0.003198	hsa-miR-320b	19	1502	0.012492
hsa-miR-328	39	4737	0.008166	hsa-miR-328	9	1637	0.005468
hsa-miR-335-5p	12	72	0.142857	hsa-miR-335-5p	26	165	0.136126
hsa-miR-339-3p					5	466	0.010616
hsa-miR-340-5p	108	852	0.1125	hsa-miR-340-5p	109	892	0.108891
hsa-miR-342-3p	106	13117	0.008016	hsa-miR-342-3p	122	12217	0.009887
hsa-miR-342-5p	76	1287	0.055759	hsa-miR-342-5p	8	301	0.02589
hsa-miR-345-5p	12	2194	0.00544	hsa-miR-345-5p	14	1780	0.007804
hsa-miR-34a-5p	19	1580	0.011882	hsa-miR-34a-5p	21	1402	0.014758
hsa-miR-3605-3p					9	494	0.017893
hsa-miR-3605-5p	63	920	0.06409	hsa-miR-3605-5p	58	645	0.082504
hsa-miR-361-3p	27	652	0.039764	hsa-miR-361-3p	22	971	0.022155
hsa-miR-361-5p	465	4631	0.091248	hsa-miR-361-5p	569	5306	0.096851
hsa-miR-3622a-5p	168	57	0.746667	hsa-miR-3622a-5p	95	16	0.855856
hsa-miR-363-3p	112	5964	0.018433	hsa-miR-363-3p	329	18647	0.017338
hsa-miR-365a-3p	16	1042	0.015123	hsa-miR-365a-3p	15	1344	0.011038
hsa-miR-365b-3p	16	1042	0.015123	hsa-miR-365b-3p	15	1344	0.011038
hsa-miR-365b-5p	11	112	0.089431
hsa-miR-3679-5p	5	38	0.116279
hsa-miR-374a-5p	59	505	0.10461	hsa-miR-374a-5p	46	381	0.107728
hsa-miR-374b-5p	112	828	0.119149	hsa-miR-374b-5p	67	682	0.089453
hsa-miR-375	567	44004	0.012721	hsa-miR-375	9288	596941	0.015321
hsa-miR-376a-3p	42	0	1	hsa-miR-376a-3p	10	0	1
hsa-miR-376c-3p	18	9	0.666667	hsa-miR-376c-3p	6	10	0.375
hsa-miR-378a-3p	2739	21517	0.112921	hsa-miR-378a-3p	3637	28161	0.114378
hsa-miR-378b	98	0	1	hsa-miR-378b	71	0	1
hsa-miR-378c	45	314	0.125348	hsa-miR-378c	51	289	0.15
hsa-miR-378d	31	100	0.236641	hsa-miR-378d	30	79	0.275229
hsa-miR-378f	294	0	1	hsa-miR-378f	266	0	1
hsa-miR-378g	351	0	1	hsa-miR-378g	320	1	0.996885
hsa-miR-378h	41	0	1	hsa-miR-378h	48	0	1
hsa-miR-378i	3513	0	1	hsa-miR-378i	4759	0	1
hsa-miR-379-3p	9	7	0.5625
hsa-miR-381-3p	94	671	0.122876	hsa-miR-381-3p	63	354	0.151079
hsa-miR-3909					7	157	0.042683
hsa-miR-383	5	88	0.053763
hsa-miR-3960	17	0	1
hsa-miR-409-3p	6	3480	0.001721	hsa-miR-409-3p	5	1554	0.003207
hsa-miR-409-5p	104	899	0.103689	hsa-miR-409-5p	76	525	0.126456
hsa-miR-410	66	695	0.086728	hsa-miR-410	23	268	0.079038
hsa-miR-411-3p	7	9	0.4375	hsa-miR-411-3p	9	1	0.9
hsa-miR-411-5p	215	1199	0.152051	hsa-miR-411-5p	79	606	0.115328
hsa-miR-421	53	1669	0.030778	hsa-miR-421	40	1851	0.021153
hsa-miR-422a	29	0	1	hsa-miR-422a	36	0	1
hsa-miR-423-3p	112	16591	0.006705	hsa-miR-423-3p	189	25890	0.007247
hsa-miR-423-5p	1626	197924	0.008148	hsa-miR-423-5p	313	43102	0.007209
hsa-miR-425-3p	5	123	0.039062
hsa-miR-425-5p	13	605	0.021036	hsa-miR-425-5p	10	1037	0.009551
hsa-miR-4286	10	95	0.095238	hsa-miR-429	5	1409	0.003536
hsa-miR-432-5p	15	1463	0.010149
hsa-miR-4448	42	0	1	hsa-miR-4448	6	0	1
hsa-miR-4485	15	548	0.026643	hsa-miR-4485	8	248	0.03125
hsa-miR-4507	12	0	1
hsa-miR-4510	168	0	1	hsa-miR-4510	189	1	0.994737
hsa-miR-454-5p	7	27	0.205882
hsa-miR-484	17	1335	0.012574	hsa-miR-484	49	1608	0.029572
hsa-miR-486-5p	7567	345912	0.021407	hsa-miR-486-5p	2090	97173	0.021055
hsa-miR-500a-3p	15168	7502	0.669078	hsa-miR-500a-3p	13852	12162	0.532483
hsa-miR-501-3p	9790	14872	0.396967	hsa-miR-501-3p	14205	13325	0.515983
hsa-miR-502-3p	806	445	0.644285	hsa-miR-502-3p	544	497	0.522574
hsa-miR-502-5p	8	6	0.571429
hsa-miR-504	9	627	0.014151	hsa-miR-504	8	572	0.013793
hsa-miR-505-3p	6	133	0.043165	hsa-miR-505-3p	9	134	0.062937
hsa-miR-532-5p	35	2968	0.011655	hsa-miR-532-5p	16	3928	0.004057
hsa-miR-548aj-5p					6	0	1
hsa-miR-548al					5	1	0.833333
hsa-miR-548am-5p	19	10	0.655172	hsa-miR-548am-5p	29	11	0.725
hsa-miR-548ar-5p	6	0	1	hsa-miR-548ar-5p	6	0	1
hsa-miR-548as-5p	17	0	1	hsa-miR-548as-5p	30	0	1
hsa-miR-548ay-5p					5	4	0.555556
hsa-miR-548c-5p	23	10	0.69697	hsa-miR-548c-5p	30	11	0.731707
hsa-miR-548d-5p	37	0	1	hsa-miR-548d-5p	36	4	0.9
hsa-miR-548g-5p					5	0	1
hsa-miR-548h-5p	55	5	0.916667	hsa-miR-548h-5p	66	5	0.929577
hsa-miR-548i	64	11	0.853333	hsa-miR-548i	44	20	0.6875
hsa-miR-548n	5	1	0.833333
hsa-miR-548o-5p	23	10	0.69697	hsa-miR-548o-5p	30	11	0.731707
hsa-miR-548w	11	12	0.478261	hsa-miR-548w	10	4	0.714286
hsa-miR-548x-5p					5	0	1
hsa-miR-574-3p	57	2972	0.018818	hsa-miR-574-3p	101	5046	0.019623
hsa-miR-582-3p	7	195	0.034653	hsa-miR-582-3p	5	210	0.023256
hsa-miR-589-3p					11	17	0.392857
hsa-miR-589-5p	24	268	0.082192	hsa-miR-589-5p	61	670	0.083447
hsa-miR-6503-3p					11	3	0.785714
hsa-miR-6510-3p					81	646	0.111417
hsa-miR-625-3p	8	24	0.25
hsa-miR-6511a-3p	588	92	0.864706	hsa-miR-6511a-3p	264	53	0.832808
hsa-miR-6511b-3p	92	147	0.384937	hsa-miR-6511b-3p	53	68	0.438017
hsa-miR-654-3p					5	379	0.013021
hsa-miR-660-5p	59	535	0.099327	hsa-miR-660-5p	38	444	0.078838
hsa-miR-664a-3p	35	287	0.108696	hsa-miR-664a-3p	6	139	0.041379
hsa-miR-664a-5p	17	202	0.077626	hsa-miR-664a-5p	10	222	0.043103
hsa-miR-671-3p	5	863	0.00576	hsa-miR-671-3p	20	2746	0.007231
hsa-miR-6716-3p	10	48	0.172414	hsa-miR-6716-3p	8	44	0.153846
hsa-miR-6724-5p	12	14	0.461538	hsa-miR-6724-5p	27	21	0.5625
hsa-miR-744-5p	198	21063	0.009313	hsa-miR-744-5p	29	3826	0.007523
hsa-miR-766-3p					5	56	0.081967
hsa-miR-769-5p	6	2582	0.002318	hsa-miR-769-5p	6	1781	0.003358
hsa-miR-873-5p	5	38	0.116279
hsa-miR-877-5p	10	739	0.013351
hsa-miR-887	57	621	0.084071	hsa-miR-887	31	315	0.089595
hsa-miR-889	9	89	0.091837	hsa-miR-889	6	20	0.230769
hsa-miR-92a-3p	7203	152206	0.045186	hsa-miR-92a-3p	9289	198686	0.044664
hsa-miR-92b-3p	3405	124611	0.026598	hsa-miR-92b-3p	4192	101083	0.03982
hsa-miR-93-5p	76	3757	0.019828	hsa-miR-93-5p	109	6699	0.016011
hsa-miR-940	10	94	0.096154
hsa-miR-941	368	13631	0.026288	hsa-miR-941	740	21400	0.033424
hsa-miR-96-5p					15	1218	0.012165
hsa-miR-98-5p	55	5404	0.010075	hsa-miR-98-5p	86	3953	0.021292
hsa-miR-99a-3p					6	639	0.009302
hsa-miR-99a-5p	661604	201702	0.766361	hsa-miR-99a-5p	537953	201005	0.727989
hsa-miR-99b-5p	40660	1458948	0.027114	hsa-miR-99b-5p	35580	1282120	0.027002

## Sheet: Q2
N				T
miRNA	Count with base edit	Count without base edit	Count with base edit/Total	miRNA	Count with base edit	Count without base edit	Count with base edit/Total
hsa-miR-196b-5p	412	5202	0.073388	hsa-miR-196b-5p	271	9087	0.028959
hsa-miR-181b-5p	4180	13122	0.241591	hsa-miR-181b-5p	3470	13597	0.203316
hsa-miR-361-5p	11	5725	0.001918	hsa-miR-361-5p	34	6652	0.005085
hsa-miR-199a-3p	184	19619	0.009292	hsa-miR-199a-3p	102	13290	0.007616
hsa-miR-574-3p	43	5795	0.007366	hsa-miR-574-3p	26	5689	0.004549
hsa-miR-128	8	1284	0.006192	hsa-miR-1260b	64	6	0.914286
hsa-miR-1260b	17	7	0.708333	hsa-miR-342-3p	49	5618	0.008647
hsa-miR-342-3p	100	8611	0.01148	hsa-miR-145-3p	23	6209	0.003691
hsa-miR-145-3p	61	15725	0.003864	hsa-miR-502-3p	245	546	0.309735
hsa-miR-502-3p	578	639	0.474938	hsa-miR-30d-5p	64150	322043	0.166109
hsa-miR-30d-5p	160140	99033	0.617888	hsa-miR-125b-1-3p	6	3746	0.001599
hsa-miR-125b-1-3p	24	6856	0.003488	hsa-miR-1307-5p	13	1051	0.012218
hsa-miR-30e-3p	2682	1972	0.576278	hsa-miR-30e-3p	1701	1740	0.494333
hsa-miR-30c-5p	116	2872	0.038822	hsa-miR-30c-5p	70	1575	0.042553
hsa-miR-149-5p	12	2289	0.005215	hsa-miR-149-5p	18	3033	0.0059
hsa-let-7b-5p	193212	170175	0.531698	hsa-let-7b-5p	335746	229778	0.59369
hsa-miR-29c-3p	6369	1427	0.816957	hsa-miR-29c-3p	5994	2494	0.706173
hsa-miR-34b-5p	5	14	0.263158	hsa-miR-19b-3p	422	2604	0.139458
hsa-miR-19b-3p	178	1451	0.109269	hsa-miR-381-3p	10	383	0.025445
hsa-miR-381-3p	13	481	0.026316	hsa-let-7f-5p	1841937	473293	0.795574
hsa-let-7f-5p	931939	268582	0.776279	hsa-miR-5585-3p	18	0	1
hsa-miR-378i	4204	1	0.999762	hsa-miR-548ab	11	0	1
hsa-miR-23c	9430	0	1	hsa-miR-378i	2923	0	1
hsa-miR-221-3p	117	18966	0.006131	hsa-miR-23c	7326	0	1
hsa-miR-664a-5p	17	398	0.040964	hsa-miR-221-3p	30	4811	0.006197
hsa-miR-34a-5p	5	552	0.008977	hsa-miR-664a-5p	29	831	0.033721
hsa-miR-199a-5p	10	1454	0.006831	hsa-miR-30a-5p	333349	61698	0.843821
hsa-miR-30a-5p	111936	159961	0.411685	hsa-let-7d-5p	1304	13231	0.089714
hsa-let-7d-5p	711	11174	0.059823	hsa-miR-26a-5p	12092	700408	0.016971
hsa-miR-6503-3p	10	9	0.526316	hsa-miR-320a	71	14638	0.004827
hsa-miR-26a-5p	5622	274202	0.020091	hsa-miR-548aj-5p	18	0	1
hsa-miR-320a	299	33222	0.00892	hsa-miR-30e-5p	62010	10829	0.85133
hsa-miR-548aj-5p	7	0	1	hsa-miR-141-3p	1283	148909	0.008542
hsa-miR-30e-5p	160294	11646	0.932267	hsa-miR-181a-5p	4584	218456	0.020552
hsa-miR-141-3p	1991	69891	0.027698	hsa-miR-136-3p	7	48	0.127273
hsa-miR-1271-5p	5	873	0.005695	hsa-let-7c	314457	347474	0.47506
hsa-miR-181a-5p	5274	277877	0.018626	hsa-miR-186-5p	355	35579	0.009879
hsa-let-7c	186623	199148	0.483766	hsa-miR-486-5p	876	85754	0.010112
hsa-miR-186-5p	402	36742	0.010823	hsa-miR-378b	48	0	1
hsa-miR-486-5p	589	55488	0.010503	hsa-miR-1180	11	1070	0.010176
hsa-miR-378b	119	0	1	hsa-miR-92b-3p	551	51846	0.010516
hsa-miR-3605-5p	10	1181	0.008396	hsa-miR-548ay-5p	17	11	0.607143
hsa-miR-92b-3p	241	23000	0.01037	hsa-miR-374b-5p	6	730	0.008152
hsa-miR-374b-5p	5	798	0.006227	hsa-let-7i-5p	398	45457	0.00868
hsa-let-7i-5p	388	47645	0.008078	hsa-miR-548w	18	0	1
hsa-miR-30c-1-3p	5	892	0.005574	hsa-miR-30b-3p	6	231	0.025316
hsa-miR-320b	40	5191	0.007647	hsa-miR-320b	6	3884	0.001542
hsa-miR-181a-2-3p	5	849	0.005855	hsa-miR-127-3p	278	29031	0.009485
hsa-miR-127-3p	474	51751	0.009076	hsa-miR-23b-3p	409	8462	0.046105
hsa-miR-654-3p	7	393	0.0175	hsa-miR-1296	7	2364	0.002952
hsa-miR-23b-3p	640	10729	0.056293	hsa-miR-5096	65	37	0.637255
hsa-miR-5096	33	21	0.611111	hsa-miR-125b-5p	11552	235996	0.046666
hsa-miR-125b-5p	7692	69449	0.099714	hsa-miR-93-5p	68	13835	0.004891
hsa-miR-93-5p	33	6351	0.005169	hsa-miR-192-5p	83	14704	0.005613
hsa-miR-429	5	1545	0.003226	hsa-let-7a-5p	1689457	972519	0.634663
hsa-miR-192-5p	18	5815	0.003086	hsa-miR-133a	186	3966	0.044798
hsa-let-7a-5p	1050296	477230	0.68758	hsa-miR-548d-5p	58	17	0.773333
hsa-miR-151b	9	1938	0.004622	hsa-miR-6511b-3p	46	55	0.455446
hsa-miR-133a	314	8949	0.033898	hsa-miR-200c-3p	562	68513	0.008136
hsa-miR-548d-5p	24	8	0.75	hsa-miR-1290	5	0	1
hsa-miR-6511b-3p	51	74	0.408	hsa-miR-96-5p	7	1855	0.003759
hsa-miR-200c-3p	296	35281	0.00832	hsa-miR-671-3p	79	11036	0.007108
hsa-miR-1290	17	0	1	hsa-miR-548ar-5p	18	0	1
hsa-miR-548ar-5p	7	0	1	hsa-miR-200b-3p	625	3238	0.161791
hsa-miR-200b-3p	1059	22195	0.045541	hsa-miR-1273e	6	13	0.315789
hsa-miR-1273e	13	0	1	hsa-miR-92a-3p	8709	577689	0.014852
hsa-miR-1301	14	193	0.067633	hsa-miR-23a-3p	151	5472	0.026854
hsa-miR-92a-3p	2339	150574	0.015296	hsa-miR-143-3p	6477	1740804	0.003707
hsa-miR-23a-3p	155	5414	0.027833	hsa-miR-378c	5	217	0.022523
hsa-miR-143-3p	20416	5847769	0.003479	hsa-miR-135b-5p	165	0	1
hsa-miR-378c	25	407	0.05787	hsa-miR-485-5p	7	93	0.07
hsa-miR-135b-5p	109	0	1	hsa-miR-125a-5p	4382	284853	0.01515
hsa-miR-195-5p	12	2267	0.005265	hsa-miR-10b-5p	124679	1285504	0.088413
hsa-miR-125a-5p	4407	173722	0.02474	hsa-miR-548i	148	13	0.919255
hsa-miR-10b-5p	171601	1711728	0.091116	hsa-miR-199b-3p	51	13276	0.003827
hsa-miR-548i	24	14	0.631579	hsa-miR-4449	84	3795	0.021655
hsa-miR-199b-3p	92	19617	0.004668	hsa-miR-421	32	1829	0.017195
hsa-miR-4449	5	114	0.042017	hsa-miR-378g	219	0	1
hsa-miR-421	20	1602	0.01233	hsa-miR-151a-5p	893	129380	0.006855
hsa-miR-378g	409	0	1	hsa-miR-423-3p	431	44853	0.009518
hsa-miR-151a-5p	294	36582	0.007973	hsa-miR-146a-5p	38	6559	0.00576
hsa-miR-374a-5p	10	275	0.035088	hsa-miR-151a-3p	696	102960	0.006715
hsa-miR-423-3p	145	17135	0.008391	hsa-miR-30a-3p	1732	2012	0.462607
hsa-miR-379-3p	6	14	0.3	hsa-miR-1304-3p	84	0	1
hsa-miR-146a-5p	153	33732	0.004515	hsa-miR-28-3p	1198	143555	0.008276
hsa-miR-151a-3p	512	68796	0.007387	hsa-miR-10a-5p	1232250	122517	0.909566
hsa-miR-3960	24	0	1	hsa-miR-181d	13387	1661	0.88962
hsa-miR-30a-3p	1766	3404	0.341586	hsa-miR-744-5p	121	25993	0.004634
hsa-miR-1304-3p	31	0	1	hsa-miR-99a-5p	106882	156967	0.405088
hsa-miR-28-3p	815	89061	0.009068	hsa-miR-196a-5p	14266	227	0.984337
hsa-miR-31-5p	5	1292	0.003855	hsa-miR-548az-5p	11	5	0.6875
hsa-miR-10a-5p	1640660	171004	0.905609	hsa-miR-107	8	5878	0.001359
hsa-miR-181d	12888	2012	0.864966	hsa-miR-548aq-5p	5	0	1
hsa-miR-744-5p	49	11162	0.004371	hsa-miR-126-5p	50	12919	0.003855
hsa-miR-99a-5p	358555	172603	0.675044	hsa-miR-148a-3p	9180	921346	0.009865
hsa-miR-196a-5p	7609	392	0.951006	hsa-miR-4677-3p	6	137	0.041958
hsa-miR-107	34	11513	0.002944	hsa-miR-1260a	48	1	0.979592
hsa-miR-126-5p	71	17477	0.004046	hsa-miR-4507	9	0	1
hsa-miR-148a-3p	2778	278274	0.009884	hsa-miR-25-3p	383	55257	0.006884
hsa-miR-1260a	66	0	1	hsa-miR-548o-5p	30	23	0.566038
hsa-miR-25-3p	192	28366	0.006723	hsa-miR-1269b	12	0	1
hsa-miR-548o-5p	22	6	0.785714	hsa-miR-101-3p	37	4632	0.007925
hsa-miR-376a-3p	24	0	1	hsa-miR-548aq-3p	5	0	1
hsa-miR-409-3p	7	1460	0.004772	hsa-miR-204-5p	28	1765	0.015616
hsa-miR-204-5p	102	9974	0.010123	hsa-miR-423-5p	2117	270713	0.007759
hsa-miR-423-5p	1096	137956	0.007882	hsa-miR-422a	16	0	1
hsa-miR-422a	20	0	1	hsa-miR-425-5p	7	3520	0.001985
hsa-miR-425-5p	5	1029	0.004836	hsa-miR-181c-5p	27	4429	0.006059
hsa-miR-181c-5p	70	8678	0.008002	hsa-miR-212-5p	6	233	0.025105
hsa-miR-125b-2-3p	232	31788	0.007245	hsa-miR-125b-2-3p	291	42878	0.006741
hsa-miR-183-5p	454	46148	0.009742	hsa-miR-183-5p	932	102573	0.009004
hsa-miR-193b-3p	14	3202	0.004353	hsa-miR-193b-3p	25	3298	0.007523
hsa-miR-363-3p	173	22783	0.007536	hsa-miR-363-3p	355	38589	0.009116
hsa-miR-874	37	2208	0.016481	hsa-miR-874	52	2725	0.018725
hsa-miR-548am-5p	22	5	0.814815	hsa-miR-548am-5p	24	18	0.571429
hsa-miR-148a-5p	23	5705	0.004015	hsa-miR-148a-5p	81	15289	0.00527
hsa-miR-200a-3p	63778	2508	0.962164	hsa-miR-589-3p	16	27	0.372093
hsa-miR-30b-5p	17	3348	0.005052	hsa-miR-200a-3p	136153	380	0.997217
hsa-miR-205-5p	375	30001	0.012345	hsa-miR-30b-5p	31	4333	0.007104
hsa-miR-98-5p	111	2512	0.042318	hsa-miR-205-5p	92	10938	0.008341
hsa-miR-501-3p	11346	13036	0.465343	hsa-miR-98-5p	123	3325	0.035673
hsa-miR-574-5p	5	932	0.005336	hsa-miR-501-3p	10530	6223	0.628544
hsa-miR-29a-3p	1189	10636	0.10055	hsa-miR-29a-3p	2058	9286	0.181417
hsa-miR-378f	410	0	1	hsa-miR-378f	219	0	1
hsa-miR-6504-5p	8	1	0.888889	hsa-miR-6504-5p	9	3	0.75
hsa-miR-548f	14	0	1	hsa-miR-548x-5p	17	0	1
hsa-miR-378h	59	0	1	hsa-miR-378h	11	0	1
hsa-miR-375	5902	614152	0.009519	hsa-miR-375	39216	4935414	0.007883
hsa-miR-99b-5p	6115	794220	0.007641	hsa-miR-99b-5p	1508	184941	0.008088
hsa-miR-146b-5p	429	66381	0.006421	hsa-miR-146b-5p	394	64330	0.006087
hsa-miR-140-3p	51	4268	0.011808	hsa-miR-548au-5p	6	18	0.25
hsa-miR-378a-3p	518	24128	0.021018	hsa-miR-140-3p	35	2817	0.012272
hsa-miR-15a-5p	5	754	0.006588	hsa-miR-378a-3p	330	13347	0.024128
hsa-miR-548as-5p	19	0	1	hsa-miR-133b	5	45	0.1
hsa-miR-26b-5p	215	32669	0.006538	hsa-miR-15a-5p	6	1690	0.003538
hsa-miR-24-3p	96	11722	0.008123	hsa-miR-548as-5p	36	1	0.972973
hsa-miR-1273a	7	0	1	hsa-miR-484	29	4420	0.006518
hsa-miR-147a	28	0	1	hsa-miR-26b-5p	334	45228	0.007331
hsa-miR-15b-5p	16	1272	0.012422	hsa-miR-24-3p	30	5517	0.005408
hsa-let-7g-5p	642	44712	0.014155	hsa-miR-147a	10	0	1
hsa-miR-365b-3p	7	463	0.014894	hsa-miR-15b-5p	6	2674	0.002239
hsa-miR-214-3p	27	1294	0.020439	hsa-let-7g-5p	867	47074	0.018085
hsa-miR-328	8	1293	0.006149	hsa-miR-365b-3p	27	1325	0.01997
hsa-let-7f-2-3p	36	0	1	hsa-miR-214-3p	13	715	0.017857
hsa-miR-6511a-3p	296	51	0.853026	hsa-miR-328	7	812	0.008547
hsa-miR-21-5p	390	59818	0.006478	hsa-let-7f-2-3p	11	0	1
hsa-miR-27b-3p	1222	330086	0.003688	hsa-miR-6511a-3p	212	46	0.821705
hsa-miR-941	680	23599	0.028008	hsa-miR-21-5p	472	78666	0.005964
hsa-miR-197-3p	6	896	0.006652	hsa-miR-27b-3p	801	206994	0.003855
hsa-miR-155-5p	19	7733	0.002451	hsa-miR-941	1356	36650	0.035679
hsa-miR-532-5p	18	4435	0.004042	hsa-miR-197-3p	5	1603	0.003109
hsa-miR-625-3p	7	12	0.368421	hsa-miR-3687	41	528	0.072056
hsa-let-7d-3p	27	3935	0.006815	hsa-miR-155-5p	6	1873	0.003193
hsa-miR-4448	191	0	1	hsa-miR-532-5p	25	4226	0.005881
hsa-miR-145-5p	92	16859	0.005427	hsa-miR-28-5p	11	4347	0.002524
hsa-miR-20a-5p	27	174	0.134328	hsa-miR-548g-5p	17	0	1
hsa-miR-130a-3p	50	11474	0.004339	hsa-let-7d-3p	43	3841	0.011071
hsa-miR-150-5p	100	16412	0.006056	hsa-miR-4448	49	0	1
hsa-miR-126-3p	20	3556	0.005593	hsa-miR-145-5p	57	10332	0.005487
hsa-miR-21-3p	43	8141	0.005254	hsa-miR-20a-5p	56	798	0.065574
hsa-miR-222-3p	230	30619	0.007456	hsa-miR-130a-3p	5	4796	0.001041
hsa-let-7e-5p	446002	64943	0.872896	hsa-miR-150-5p	33	5148	0.006369
hsa-miR-4510	222	0	1	hsa-miR-21-3p	78	7892	0.009787
hsa-miR-148b-3p	319	1353	0.190789	hsa-miR-222-3p	154	17385	0.00878
hsa-miR-548n	5	1	0.833333	hsa-miR-361-3p	5	900	0.005525
hsa-miR-100-5p	174930	361262	0.326245	hsa-let-7e-5p	854634	32478	0.963389
hsa-miR-500a-3p	13099	11289	0.537108	hsa-miR-4510	351	0	1
hsa-miR-22-3p	2625	348408	0.007478	hsa-miR-148b-3p	998	2232	0.308978
hsa-miR-182-5p	1708	176297	0.009595	hsa-miR-548n	20	0	1
hsa-miR-16-5p	399	26684	0.014732	hsa-miR-100-5p	153089	105418	0.592204
hsa-miR-100-3p	7	14	0.333333	hsa-miR-500a-3p	6273	10504	0.373905
hsa-miR-411-5p	38	592	0.060317	hsa-miR-22-3p	3161	418751	0.007492
hsa-miR-103a-3p	356	26232	0.013389	hsa-miR-182-5p	4692	504050	0.009223
hsa-miR-143-5p	33	1316	0.024463	hsa-miR-16-5p	645	51276	0.012423
hsa-miR-342-5p	17	1196	0.014015	hsa-miR-411-5p	24	500	0.045802
hsa-miR-769-5p	10	2898	0.003439	hsa-miR-103a-3p	496	31083	0.015707
hsa-miR-411-3p	5	10	0.333333	hsa-miR-143-5p	10	672	0.014663
hsa-miR-548c-5p	22	6	0.785714	hsa-miR-342-5p	10	482	0.020325
hsa-miR-27b-5p	5	1113	0.004472	hsa-miR-345-5p	9	3324	0.0027
hsa-miR-365a-3p	7	463	0.014894	hsa-miR-215	15	5	0.75
hsa-miR-19a-3p	1287	103	0.925899	hsa-miR-769-5p	20	7229	0.002759
hsa-miR-27a-3p	18	4633	0.00387	hsa-miR-548c-5p	30	23	0.566038
hsa-miR-191-5p	9052	1081733	0.008299	hsa-miR-365a-3p	27	1325	0.01997
hsa-miR-1273f	9	0	1	hsa-miR-19a-3p	2357	198	0.922505
				hsa-miR-191-5p	14526	1602832	0.008981
				hsa-miR-1273f	9	1	0.9

## Sheet: Q3
N				T
miRNA	Count with base edit	Count without base edit	Count with base edit/Total	miRNA	Count with base edit	Count without base edit	Count with base edit/Total
hsa-miR-361-5p	812	1642	0.330888	hsa-miR-361-5p	762	1673	0.312936
hsa-miR-502-3p	182	204	0.471503	hsa-miR-193a-3p	7	31	0.184211
hsa-miR-30d-5p	124894	39885	0.757949	hsa-miR-1260b	8	0	1
hsa-miR-30c-2-3p	75	217	0.256849	hsa-miR-502-3p	226	240	0.484979
hsa-miR-30e-3p	2578	1758	0.594557	hsa-miR-30d-5p	188049	80983	0.698984
hsa-miR-3622a-5p	11	31	0.261905	hsa-miR-30c-2-3p	131	338	0.279318
hsa-miR-149-5p	57	727	0.072704	hsa-miR-30e-3p	3473	1865	0.650618
hsa-miR-34c-5p	10	210	0.045455	hsa-miR-149-5p	50	736	0.063613
hsa-miR-381-3p	462	590	0.439163	hsa-miR-34c-5p	12	242	0.047244
hsa-miR-378i	2740	0	1	hsa-miR-381-3p	539	836	0.392
hsa-miR-23c	7329	0	1	hsa-miR-378i	2379	0	1
hsa-miR-221-3p	1030	27128	0.036579	hsa-miR-23c	5267	0	1
hsa-miR-185-5p	56	128	0.304348	hsa-miR-221-3p	613	21444	0.027792
hsa-miR-6503-3p	6	6	0.5	hsa-miR-20b-3p	7	15	0.318182
hsa-miR-652-3p	40	116	0.25641	hsa-miR-185-5p	32	77	0.293578
hsa-miR-17-5p	90	223	0.28754	hsa-miR-6503-3p	6	8	0.428571
hsa-miR-873-5p	15	78	0.16129	hsa-miR-652-3p	42	107	0.281879
hsa-miR-92b-3p	1178	10985	0.096851	hsa-miR-17-5p	256	645	0.284129
hsa-miR-542-3p	9	38	0.191489	hsa-miR-92b-3p	499	6367	0.072677
hsa-miR-374b-5p	317	769	0.291897	hsa-miR-542-3p	28	87	0.243478
hsa-miR-29c-5p	35	209	0.143443	hsa-miR-374b-5p	313	815	0.277482
hsa-let-7i-5p	1189	52895	0.021984	hsa-miR-29c-5p	15	178	0.07772
hsa-miR-33a-5p	12	9	0.571429	hsa-let-7i-5p	1002	49582	0.019809
hsa-miR-30c-1-3p	46	115	0.285714	hsa-miR-33a-5p	29	39	0.426471
hsa-miR-589-5p	70	189	0.27027	hsa-miR-30c-1-3p	69	160	0.30131
hsa-miR-548w	18	5	0.782609	hsa-miR-589-5p	96	259	0.270423
hsa-miR-561-5p	13	36	0.265306	hsa-miR-548w	13	2	0.866667
hsa-miR-548o-3p	26	27	0.490566	hsa-miR-561-5p	20	63	0.240964
hsa-miR-181c-3p	9	452	0.019523	hsa-miR-548o-3p	32	48	0.4
hsa-miR-181a-2-3p	5	509	0.009728	hsa-miR-181c-3p	5	352	0.014006
hsa-miR-127-3p	3454	36500	0.086449	hsa-miR-127-3p	3285	29251	0.100965
hsa-miR-654-3p	13	483	0.02621	hsa-miR-654-3p	9	535	0.016544
hsa-miR-335-3p	15	207	0.067568	hsa-miR-335-3p	6	262	0.022388
hsa-miR-23b-3p	5822	8532	0.405601	hsa-miR-23b-3p	3937	6254	0.386321
hsa-miR-125b-5p	90163	43197	0.676087	hsa-miR-5096	13	28	0.317073
hsa-miR-429	19	2094	0.008992	hsa-miR-125b-5p	65498	39473	0.623963
hsa-miR-508-3p	6	18	0.25	hsa-miR-429	22	1454	0.014905
hsa-miR-133a	4880	7731	0.386964	hsa-miR-133a	3272	5745	0.36287
hsa-miR-200b-5p	8	135	0.055944	hsa-miR-200b-5p	15	132	0.102041
hsa-miR-548d-5p	64	2	0.969697	hsa-miR-548d-5p	44	9	0.830189
hsa-miR-671-3p	10	383	0.025445	hsa-miR-18b-5p	5	12	0.294118
hsa-miR-1301	5	46	0.098039	hsa-miR-671-3p	11	511	0.021073
hsa-miR-9-5p	177	910	0.162833	hsa-miR-18a-5p	14	19	0.424242
hsa-miR-210	33	296	0.100304	hsa-miR-9-5p	90	277	0.245232
hsa-miR-23a-3p	2551	3984	0.39036	hsa-miR-210	51	477	0.096591
hsa-miR-143-3p	205119	14487142	0.013961	hsa-miR-449c-5p	18	171	0.095238
hsa-miR-378c	145	469	0.236156	hsa-miR-23a-3p	1836	3120	0.37046
hsa-miR-135b-5p	457	13	0.97234	hsa-miR-143-3p	128603	9074344	0.013974
hsa-miR-195-5p	1989	4692	0.29771	hsa-miR-378c	180	404	0.308219
hsa-miR-7-1-3p	7	33	0.175	hsa-miR-135b-5p	513	24	0.955307
hsa-miR-125a-5p	21146	105673	0.166742	hsa-miR-195-5p	1293	3231	0.285809
hsa-miR-10b-5p	655123	4006075	0.140548	hsa-miR-7-1-3p	14	44	0.241379
hsa-miR-148b-5p	8	131	0.057554	hsa-miR-125a-5p	11944	83600	0.12501
hsa-miR-4454	36	163	0.180905	hsa-miR-10b-5p	385467	3984746	0.088203
hsa-miR-224-3p	6	44	0.12	hsa-miR-148b-5p	26	272	0.087248
hsa-miR-374a-5p	240	493	0.327422	hsa-miR-337-5p	5	14	0.263158
hsa-miR-423-3p	407	3142	0.11468	hsa-miR-4454	68	301	0.184282
hsa-miR-146a-5p	4678	11238	0.293918	hsa-miR-224-3p	8	17	0.32
hsa-miR-3960	8	0	1	hsa-miR-374a-5p	208	537	0.279195
hsa-miR-28-3p	12783	30788	0.293383	hsa-miR-423-3p	369	3632	0.092227
hsa-miR-31-5p	309	711	0.302941	hsa-miR-146a-5p	5241	12769	0.291005
hsa-miR-10a-5p	3854931	533080	0.878514	hsa-miR-3960	5	0	1
hsa-miR-452-5p	51	143	0.262887	hsa-miR-28-3p	9739	23841	0.290024
hsa-miR-181d	4269	1526	0.73667	hsa-miR-4792	7	0	1
hsa-let-7a-3p	34	153	0.181818	hsa-miR-31-5p	239	570	0.295426
hsa-miR-504	8	86	0.085106	hsa-miR-10a-5p	3850413	230260	0.943573
hsa-miR-744-5p	8	933	0.008502	hsa-miR-452-5p	30	71	0.29703
hsa-miR-99a-5p	472614	264593	0.641087	hsa-miR-181d	5380	964	0.848045
hsa-miR-532-3p	18	27	0.4	hsa-let-7a-3p	60	266	0.184049
hsa-miR-196a-5p	6023	654	0.902052	hsa-miR-504	5	117	0.040984
hsa-miR-126-5p	1318	52830	0.024341	hsa-miR-744-5p	19	1154	0.016198
hsa-miR-4677-3p	6	24	0.2	hsa-miR-99a-5p	347845	251973	0.579918
hsa-miR-1247-5p	19	171	0.1	hsa-miR-532-3p	23	44	0.343284
hsa-miR-383	10	32	0.238095	hsa-miR-196a-5p	7655	101	0.986978
hsa-miR-3613-3p	5	6	0.454545	hsa-miR-3607-3p	17	255	0.0625
hsa-miR-497-5p	57	2016	0.027496	hsa-miR-126-5p	981	46854	0.020508
hsa-miR-378d	62	103	0.375758	hsa-miR-4677-3p	19	40	0.322034
hsa-miR-101-3p	3859	10613	0.266653	hsa-miR-1247-5p	6	183	0.031746
hsa-miR-139-3p	11	19	0.366667	hsa-miR-497-5p	52	1749	0.028873
hsa-miR-424-5p	41	137	0.230337	hsa-miR-378d	56	73	0.434109
hsa-miR-194-5p	18	321	0.053097	hsa-miR-101-3p	5383	14818	0.266472
hsa-miR-1248	7	22	0.241379	hsa-miR-101-5p	7	63	0.1
hsa-miR-422a	17	1	0.944444	hsa-miR-139-3p	6	20	0.230769
hsa-miR-152	272	611	0.308041	hsa-miR-424-5p	77	210	0.268293
hsa-miR-376c-3p	27	22	0.55102	hsa-miR-194-5p	27	462	0.055215
hsa-miR-363-3p	844	10485	0.074499	hsa-miR-1248	70	251	0.218069
hsa-miR-193b-3p	205	466	0.305514	hsa-miR-422a	8	1	0.888889
hsa-miR-148a-5p	222	2074	0.09669	hsa-miR-152	221	482	0.314367
hsa-miR-30b-5p	1507	1764	0.460715	hsa-miR-376c-3p	7	15	0.318182
hsa-miR-205-5p	3760	46180	0.07529	hsa-miR-363-3p	1698	21964	0.071761
hsa-miR-6503-5p	7	17	0.291667	hsa-miR-193b-3p	220	495	0.307692
hsa-miR-548x-5p	13	0	1	hsa-miR-148a-5p	786	6462	0.108444
hsa-miR-378h	35	0	1	hsa-miR-30b-5p	2892	3737	0.436265
hsa-miR-375	8938	87988	0.092215	hsa-miR-205-5p	3340	42231	0.073292
hsa-miR-99b-5p	24175	473728	0.048554	hsa-miR-3609	5	70	0.066667
hsa-miR-146b-5p	13597	32078	0.29769	hsa-miR-548x-5p	12	0	1
hsa-miR-378a-3p	5046	11884	0.298051	hsa-miR-378h	37	0	1
hsa-miR-5683	16	24	0.4	hsa-miR-375	37761	467743	0.0747
hsa-miR-133b	32	189	0.144796	hsa-miR-99b-5p	13329	347946	0.036894
hsa-miR-221-5p	276	803	0.255792	hsa-miR-146b-5p	18301	44880	0.28966
hsa-miR-24-3p	2000	12784	0.135281	hsa-miR-378a-3p	3348	8318	0.286988
hsa-miR-15b-5p	184	375	0.329159	hsa-miR-5683	7	9	0.4375
hsa-miR-223-3p	180	411	0.304569	hsa-miR-133b	28	161	0.148148
hsa-miR-142-5p	2616	3536	0.425228	hsa-miR-221-5p	318	788	0.287523
hsa-miR-328	26	722	0.034759	hsa-miR-24-3p	1198	9658	0.110354
hsa-miR-330-5p	7	73	0.0875	hsa-miR-15b-5p	284	614	0.316258
hsa-let-7f-2-3p	146	12	0.924051	hsa-miR-223-3p	194	447	0.302652
hsa-miR-139-5p	34	99	0.255639	hsa-miR-142-5p	3278	4544	0.419074
hsa-miR-22-5p	5	67	0.069444	hsa-miR-328	6	418	0.014151
hsa-miR-6511a-3p	52	12	0.8125	hsa-let-7f-2-3p	219	14	0.939914
hsa-miR-941	324	4270	0.070527	hsa-miR-139-5p	60	95	0.387097
hsa-miR-766-3p	6	7	0.461538	hsa-miR-6511a-3p	32	12	0.727273
hsa-miR-889	38	60	0.387755	hsa-miR-941	496	6241	0.073623
hsa-miR-330-3p	22	27	0.44898	hsa-miR-449a	12	721	0.016371
hsa-miR-28-5p	140	3522	0.03823	hsa-miR-889	46	73	0.386555
hsa-miR-616-5p	7	13	0.35	hsa-miR-330-3p	7	40	0.148936
hsa-miR-4448	39	0	1	hsa-miR-28-5p	133	4144	0.031097
hsa-miR-340-3p	9	27	0.25	hsa-miR-625-3p	5	14	0.263158
hsa-miR-451a	192	7452	0.025118	hsa-miR-4448	180	0	1
hsa-miR-126-3p	987	3751	0.208316	hsa-miR-340-3p	11	43	0.203704
hsa-miR-150-5p	34	812	0.040189	hsa-miR-3065-3p	13	33	0.282609
hsa-miR-361-3p	79	488	0.13933	hsa-miR-451a	52	3014	0.01696
hsa-let-7e-5p	212470	9154	0.958696	hsa-miR-126-3p	924	3614	0.203614
hsa-miR-200a-5p	13	163	0.073864	hsa-miR-150-5p	42	1391	0.029309
hsa-miR-4510	190	0	1	hsa-miR-361-3p	70	580	0.107692
hsa-miR-548n	6	3	0.666667	hsa-let-7e-5p	354812	8077	0.977743
hsa-miR-146b-3p	14	165	0.078212	hsa-miR-200a-5p	17	143	0.10625
hsa-miR-182-5p	22001	49854	0.306186	hsa-miR-4510	235	0	1
hsa-miR-103a-3p	2934	18364	0.137759	hsa-miR-548n	8	1	0.888889
hsa-miR-548ak	6	1	0.857143	hsa-miR-146b-3p	12	268	0.042857
hsa-let-7i-3p	9	50	0.152542	hsa-miR-182-5p	66096	154350	0.299829
hsa-miR-345-5p	53	1260	0.040366	hsa-miR-103a-3p	4008	25385	0.136359
hsa-miR-199b-5p	1009	2335	0.301734	hsa-let-7i-3p	5	57	0.080645
hsa-miR-769-5p	122	2128	0.054222	hsa-miR-345-5p	67	1502	0.042702
hsa-miR-411-3p	6	3	0.666667	hsa-miR-199b-5p	1280	2951	0.302529
hsa-miR-548c-5p	14	19	0.424242	hsa-miR-769-5p	121	3253	0.035862
hsa-miR-27b-5p	383	992	0.278545	hsa-miR-548c-5p	20	14	0.588235
hsa-miR-19a-3p	2247	212	0.913786	hsa-miR-27b-5p	233	656	0.262092
hsa-miR-181b-5p	3215	4347	0.425152	hsa-miR-19a-3p	5980	492	0.92398
hsa-miR-196b-5p	2381	3851	0.38206	hsa-miR-181b-5p	2113	5462	0.278944
hsa-miR-199a-3p	22169	25120	0.468798	hsa-miR-196b-5p	2332	5022	0.317106
hsa-miR-574-3p	208	1715	0.108164	hsa-miR-199a-3p	18143	20760	0.466365
hsa-miR-128	6	660	0.009009	hsa-miR-574-3p	215	1713	0.111515
hsa-miR-134	63	117	0.35	hsa-miR-128	7	859	0.008083
hsa-miR-145-3p	6391	19597	0.245921	hsa-miR-134	47	116	0.288344
hsa-miR-342-3p	2172	5241	0.292999	hsa-miR-3653	5	100	0.047619
hsa-miR-125b-1-3p	32	2009	0.015679	hsa-miR-6716-3p	6	10	0.375
hsa-miR-30d-3p	69	270	0.20354	hsa-miR-145-3p	4210	12749	0.248246
hsa-miR-409-5p	92	201	0.313993	hsa-miR-342-3p	2171	5112	0.298091
hsa-miR-1307-5p	114	123	0.481013	hsa-miR-125b-1-3p	22	1375	0.015748
hsa-miR-224-5p	29	850	0.032992	hsa-miR-30d-3p	183	709	0.205157
hsa-miR-30c-5p	4643	2836	0.620805	hsa-miR-409-5p	81	193	0.29562
hsa-miR-708-5p	18	72	0.2	hsa-miR-1307-5p	140	335	0.294737
hsa-let-7b-5p	119449	40012	0.74908	hsa-miR-30c-5p	4686	2996	0.609997
hsa-miR-29c-3p	8290	2690	0.755009	hsa-miR-708-5p	24	74	0.244898
hsa-miR-19b-3p	3258	2305	0.585655	hsa-let-7b-5p	157103	57149	0.733263
hsa-miR-455-5p	37	445	0.076763	hsa-miR-29c-3p	11142	4761	0.700623
hsa-let-7f-5p	442406	166451	0.726617	hsa-miR-19b-3p	7815	6022	0.56479
hsa-miR-203a	315	1179	0.210843	hsa-miR-455-5p	41	369	0.1
hsa-miR-664a-5p	29	60	0.325843	hsa-let-7f-5p	765290	215171	0.780541
hsa-miR-195-3p	105	216	0.327103	hsa-miR-5585-3p	10	0	1
hsa-miR-199a-5p	4619	5463	0.458143	hsa-miR-548ab	6	0	1
hsa-miR-34a-5p	525	1057	0.331858	hsa-miR-203a	397	1752	0.184737
hsa-miR-5680	7	19	0.269231	hsa-miR-664a-5p	20	64	0.238095
hsa-miR-335-5p	68	112	0.377778	hsa-miR-195-3p	53	126	0.296089
hsa-let-7d-5p	478	5129	0.085251	hsa-miR-199a-5p	3286	3676	0.471991
hsa-miR-30a-5p	101893	106083	0.489927	hsa-miR-34a-5p	383	837	0.313934
hsa-miR-26a-5p	387310	437995	0.469293	hsa-miR-335-5p	71	110	0.392265
hsa-miR-499a-5p	10	19	0.344828	hsa-let-7d-5p	817	4907	0.142732
hsa-miR-16-2-3p	5	182	0.026738	hsa-miR-30a-5p	165740	151713	0.522093
hsa-miR-320a	638	7294	0.080434	hsa-miR-26a-5p	370748	421850	0.467763
hsa-miR-548aj-5p	16	0	1	hsa-miR-499a-5p	17	33	0.34
hsa-miR-30e-5p	112846	11451	0.907874	hsa-miR-16-2-3p	5	136	0.035461
hsa-miR-374a-3p	8	309	0.025237	hsa-miR-320a	382	4706	0.075079
hsa-miR-1271-5p	93	789	0.105442	hsa-miR-548aj-5p	16	0	1
hsa-miR-141-3p	3077	51425	0.056457	hsa-miR-30e-5p	159785	14026	0.919303
hsa-let-7c	44894	123514	0.266579	hsa-miR-374a-3p	23	357	0.060526
hsa-miR-136-3p	107	274	0.28084	hsa-miR-1271-5p	77	742	0.094017
hsa-miR-181a-5p	6920	88024	0.072885	hsa-miR-141-3p	4366	134501	0.03144
hsa-miR-186-5p	13909	31688	0.305042	hsa-let-7c	94494	162760	0.367318
hsa-miR-339-5p	40	91	0.305344	hsa-miR-136-3p	129	291	0.307143
hsa-miR-3605-5p	19	76	0.2	hsa-miR-181a-5p	10998	125286	0.080699
hsa-miR-378b	97	0	1	hsa-miR-550a-5p	14	20	0.411765
hsa-miR-486-5p	5620	107915	0.0495	hsa-miR-186-5p	13135	30619	0.300201
hsa-miR-339-3p	14	147	0.086957	hsa-miR-339-5p	73	142	0.339535
hsa-miR-548ay-5p	13	2	0.866667	hsa-miR-3605-5p	16	77	0.172043
hsa-miR-548c-3p	6	0	1	hsa-miR-378b	67	1	0.985294
hsa-miR-576-5p	7	12	0.368421	hsa-miR-486-5p	2461	49775	0.047113
hsa-miR-218-5p	106	856	0.110187	hsa-miR-339-3p	19	152	0.111111
hsa-miR-582-5p	34	112	0.232877	hsa-miR-548ay-5p	12	7	0.631579
hsa-miR-135a-5p	110	532	0.17134	hsa-miR-1246	5	18	0.217391
hsa-miR-320b	100	851	0.105152	hsa-miR-576-5p	8	19	0.296296
hsa-miR-1296	46	326	0.123656	hsa-miR-218-5p	136	1097	0.1103
hsa-miR-93-5p	142	3960	0.034617	hsa-miR-30b-3p	7	12	0.368421
hsa-let-7a-5p	551969	222625	0.712591	hsa-miR-582-5p	31	78	0.284404
hsa-miR-192-5p	159	9772	0.01601	hsa-miR-135a-5p	158	593	0.210386
hsa-miR-151b	154	1768	0.080125	hsa-miR-320b	84	453	0.156425
hsa-miR-10b-3p	17	108	0.136	hsa-miR-1296	54	691	0.072483
hsa-miR-29b-3p	270	298	0.475352	hsa-miR-93-5p	241	9255	0.025379
hsa-miR-99a-3p	102	818	0.11087	hsa-let-7a-5p	747525	400571	0.6511
hsa-miR-6511b-3p	12	13	0.48	hsa-miR-192-5p	203	13901	0.014393
hsa-miR-454-5p	6	23	0.206897	hsa-miR-7-5p	27	145	0.156977
hsa-miR-200c-3p	133	3298	0.038764	hsa-miR-151b	188	2307	0.075351
hsa-miR-301b	8	11	0.421053	hsa-miR-10b-3p	14	107	0.115702
hsa-miR-96-5p	229	514	0.30821	hsa-miR-29b-3p	253	327	0.436207
hsa-miR-5100	6	0	1	hsa-miR-99a-3p	125	1279	0.089031
hsa-miR-200b-3p	449	5807	0.071771	hsa-miR-6511b-3p	12	8	0.6
hsa-miR-548ar-5p	16	0	1	hsa-miR-454-5p	7	30	0.189189
hsa-miR-92a-3p	10102	62582	0.138985	hsa-miR-200c-3p	260	10377	0.024443
hsa-miR-130b-3p	10	186	0.05102	hsa-miR-301b	13	38	0.254902
hsa-miR-548z	6	1	0.857143	hsa-miR-96-5p	752	1716	0.3047
hsa-miR-6510-3p	26	55	0.320988	hsa-miR-548ar-5p	13	0	1
hsa-miR-17-3p	37	71	0.342593	hsa-miR-200b-3p	381	4405	0.079607
hsa-miR-4286	6	8	0.428571	hsa-miR-92a-3p	14518	112253	0.114521
hsa-miR-660-5p	294	440	0.400545	hsa-miR-130b-3p	20	371	0.051151
hsa-miR-548i	75	10	0.882353	hsa-miR-6510-3p	15	43	0.258621
hsa-miR-199b-3p	11083	25118	0.306152	hsa-miR-17-3p	50	133	0.273224
hsa-miR-454-3p	5	351	0.014045	hsa-miR-4286	10	55	0.153846
hsa-miR-410	155	230	0.402597	hsa-miR-660-5p	571	829	0.407857
hsa-miR-421	108	1142	0.0864	hsa-miR-548i	56	11	0.835821
hsa-miR-3200-3p	5	16	0.238095	hsa-miR-199b-3p	9068	20756	0.30405
hsa-miR-151a-5p	2241	23525	0.086975	hsa-miR-454-3p	10	490	0.02
hsa-miR-378g	598	0	1	hsa-miR-331-3p	18	28	0.391304
hsa-miR-1285-3p	17	17	0.5	hsa-miR-410	126	252	0.333333
hsa-miR-144-5p	118	298	0.283654	hsa-miR-421	80	883	0.083074
hsa-miR-151a-3p	722	28774	0.024478	hsa-miR-151a-5p	3209	30534	0.095101
hsa-miR-1304-3p	38	6	0.863636	hsa-miR-378g	564	2	0.996466
hsa-miR-30a-3p	2387	2642	0.474647	hsa-miR-1285-3p	21	16	0.567568
hsa-miR-577	14	124	0.101449	hsa-miR-144-5p	32	86	0.271186
hsa-miR-4770	9	36	0.2	hsa-miR-151a-3p	816	34964	0.022806
hsa-miR-136-5p	28	76	0.269231	hsa-miR-379-3p	5	4	0.555556
hsa-miR-153	16	31	0.340426	hsa-miR-1304-3p	76	16	0.826087
hsa-miR-26b-3p	44	361	0.108642	hsa-miR-30a-3p	2820	4102	0.407397
hsa-miR-107	502	6987	0.067032	hsa-miR-577	6	33	0.153846
hsa-miR-582-3p	51	477	0.096591	hsa-miR-206	5	9	0.357143
hsa-miR-340-5p	566	1159	0.328116	hsa-miR-4770	9	58	0.134328
hsa-miR-148a-3p	56162	124318	0.311181	hsa-miR-136-5p	41	109	0.273333
hsa-miR-20b-5p	73	218	0.250859	hsa-miR-153	96	153	0.385542
hsa-miR-1260a	5	0	1	hsa-miR-26b-3p	33	315	0.094828
hsa-miR-25-3p	868	24525	0.034183	hsa-miR-548az-5p	6	9	0.4
hsa-miR-106b-3p	83	1087	0.07094	hsa-miR-107	510	7300	0.065301
hsa-miR-548o-5p	14	19	0.424242	hsa-miR-582-3p	49	452	0.097804
hsa-miR-1307-3p	9	280	0.031142	hsa-miR-340-5p	860	1687	0.337652
hsa-miR-376a-3p	34	0	1	hsa-miR-148a-3p	165688	384842	0.300961
hsa-miR-204-5p	917	24714	0.035777	hsa-miR-20b-5p	293	698	0.295661
hsa-miR-409-3p	31	971	0.030938	hsa-miR-1260a	6	0	1
hsa-miR-3065-5p	7	14	0.333333	hsa-miR-25-3p	1088	39188	0.027014
hsa-miR-1	168	200	0.456522	hsa-miR-106b-3p	82	1278	0.060294
hsa-miR-423-5p	1425	3341	0.298993	hsa-miR-548o-5p	20	14	0.588235
hsa-miR-455-3p	7	64	0.098592	hsa-miR-1307-3p	6	425	0.013921
hsa-miR-425-5p	182	424	0.30033	hsa-miR-376a-3p	52	2	0.962963
hsa-miR-181c-5p	488	9053	0.051148	hsa-miR-548aq-3p	5	1	0.833333
hsa-miR-212-5p	31	192	0.139013	hsa-miR-204-5p	166	5939	0.027191
hsa-miR-125b-2-3p	583	11714	0.04741	hsa-miR-324-3p	5	52	0.087719
hsa-miR-183-5p	6567	14003	0.319251	hsa-miR-409-3p	28	980	0.027778
hsa-miR-874	69	437	0.136364	hsa-miR-3065-5p	13	16	0.448276
hsa-miR-338-3p	152	1647	0.084491	hsa-miR-1	128	209	0.379822
hsa-miR-548am-5p	15	18	0.454545	hsa-miR-423-5p	1084	2432	0.308305
hsa-miR-200a-3p	46387	2764	0.943765	hsa-miR-455-3p	9	71	0.1125
hsa-miR-98-5p	105	7582	0.013659	hsa-miR-425-5p	516	924	0.358333
hsa-miR-501-3p	3131	2413	0.564755	hsa-miR-181c-5p	416	7744	0.05098
hsa-miR-29a-3p	7136	9043	0.441066	hsa-miR-212-5p	28	188	0.12963
hsa-miR-378f	436	0	1	hsa-miR-125b-2-3p	521	9712	0.050914
hsa-miR-223-5p	13	11	0.541667	hsa-miR-183-5p	22058	47963	0.31502
hsa-miR-140-3p	1537	4382	0.259672	hsa-miR-874	53	554	0.087315
hsa-miR-106b-5p	124	153	0.447653	hsa-miR-548am-5p	19	13	0.59375
hsa-miR-505-3p	32	74	0.301887	hsa-miR-338-3p	39	362	0.097257
hsa-miR-887	26	283	0.084142	hsa-miR-200a-3p	120625	2252	0.981673
hsa-miR-15a-5p	749	1718	0.303608	hsa-miR-98-5p	106	8149	0.012841
hsa-miR-484	43	508	0.07804	hsa-miR-944	6	22	0.214286
hsa-miR-548as-5p	28	0	1	hsa-miR-501-3p	4739	3287	0.590456
hsa-miR-26b-5p	12961	32334	0.286146	hsa-miR-29a-3p	9670	11527	0.456197
hsa-miR-147a	5	0	1	hsa-miR-378f	379	0	1
hsa-miR-132-3p	6	181	0.032086	hsa-miR-548f	16	0	1
hsa-let-7g-5p	1673	49434	0.032735	hsa-miR-223-5p	19	9	0.678571
hsa-miR-365b-3p	163	279	0.368778	hsa-miR-140-3p	1072	2960	0.265873
hsa-miR-214-3p	262	475	0.355495	hsa-miR-106b-5p	250	413	0.377074
hsa-miR-21-5p	2518	168640	0.014712	hsa-miR-505-3p	15	82	0.154639
hsa-miR-27b-3p	276631	362896	0.432556	hsa-miR-887	15	175	0.078947
hsa-miR-155-5p	27	1959	0.013595	hsa-miR-15a-5p	838	1771	0.321196
hsa-miR-532-5p	65	3432	0.018587	hsa-miR-548as-5p	20	0	1
hsa-miR-548g-5p	13	0	1	hsa-miR-484	50	683	0.068213
hsa-miR-548h-5p	45	5	0.9	hsa-miR-26b-5p	16198	42597	0.2755
hsa-let-7d-3p	38	624	0.057402	hsa-miR-147a	43	1	0.977273
hsa-miR-145-5p	7362	75128	0.089247	hsa-miR-1273a	5	0	1
hsa-miR-20a-5p	144	251	0.364557	hsa-let-7g-5p	2528	57968	0.041788
hsa-miR-106a-5p	9	52	0.147541	hsa-miR-365b-3p	167	313	0.347917
hsa-miR-130a-3p	3437	9100	0.274149	hsa-miR-214-3p	194	339	0.363977
hsa-miR-21-3p	1249	3230	0.278857	hsa-miR-21-5p	2790	199351	0.013802
hsa-miR-222-3p	422	9848	0.041091	hsa-miR-27b-3p	197928	267444	0.425311
hsa-miR-148b-3p	701	1176	0.373468	hsa-miR-197-3p	5	243	0.020161
hsa-miR-100-5p	303239	408611	0.425987	hsa-miR-3687	13	216	0.056769
hsa-miR-500a-3p	3142	1924	0.620213	hsa-miR-155-5p	18	2010	0.008876
hsa-miR-142-3p	21	132	0.137255	hsa-miR-532-5p	53	4625	0.01133
hsa-miR-22-3p	14042	142684	0.089596	hsa-miR-548g-5p	12	0	1
hsa-miR-16-5p	24861	30726	0.447245	hsa-miR-548h-5p	40	2	0.952381
hsa-miR-411-5p	347	759	0.313743	hsa-let-7d-3p	42	672	0.058824
hsa-miR-4485	21	201	0.094595	hsa-miR-145-5p	3706	39316	0.086142
hsa-miR-664a-3p	160	354	0.311284	hsa-miR-20a-5p	369	820	0.310345
hsa-miR-143-5p	510	568	0.473098	hsa-miR-106a-5p	64	228	0.219178
hsa-miR-6500-3p	11	14	0.44	hsa-miR-130a-3p	2273	6287	0.265537
hsa-miR-215	5	103	0.046296	hsa-miR-21-3p	1709	3932	0.30296
hsa-miR-1247-3p	16	75	0.175824	hsa-miR-222-3p	257	6886	0.035979
hsa-miR-301a-3p	130	260	0.333333	hsa-miR-148b-3p	1255	1902	0.397529
hsa-miR-365a-3p	163	279	0.368778	hsa-miR-100-5p	266763	301320	0.469585
hsa-miR-27a-3p	6115	7548	0.447559	hsa-miR-500a-3p	4531	3177	0.587831
hsa-miR-744-3p	5	22	0.185185	hsa-miR-142-3p	26	149	0.148571
hsa-miR-141-5p	21	226	0.08502	hsa-miR-22-3p	13133	139066	0.086288
hsa-miR-191-5p	105626	204726	0.340343	hsa-miR-16-5p	24478	30410	0.445963
				hsa-miR-411-5p	360	857	0.295809
				hsa-miR-4485	63	793	0.073598
				hsa-miR-664a-3p	155	408	0.275311
				hsa-miR-214-5p	7	152	0.044025
				hsa-miR-143-5p	344	432	0.443299
				hsa-miR-1247-3p	14	35	0.285714
				hsa-miR-301a-3p	115	276	0.294118
				hsa-miR-365a-3p	167	313	0.347917
				hsa-miR-27a-3p	5148	6884	0.427859
				hsa-miR-1291	10	75	0.117647
				hsa-miR-190b	14	251	0.05283
				hsa-miR-744-3p	13	48	0.213115
				hsa-miR-1285-5p	10	4	0.714286
				hsa-miR-141-5p	82	840	0.088937
				hsa-miR-191-5p	181160	358729	0.33555
				hsa-miR-33b-5p	6	60	0.090909

## Sheet: Q4
N				T
miRNA	Count with base edit	Count without base edit	Count with base edit/Total	miRNA	Count with base edit	Count without base edit	Count with base edit/Total
hsa-miR-361-5p	258	2979	0.079703	hsa-miR-361-5p	299	2197	0.119792
hsa-miR-502-3p	424	842	0.334913	hsa-miR-502-3p	298	311	0.489327
hsa-miR-30d-5p	582152	73064	0.888489	hsa-miR-30d-5p	194884	58603	0.768813
hsa-miR-30c-2-3p	26	742	0.033854	hsa-miR-30c-2-3p	16	229	0.065306
hsa-miR-30e-3p	6148	3726	0.622645	hsa-miR-30e-3p	2857	2389	0.544605
hsa-miR-490-5p	5	15	0.25	hsa-miR-3622a-5p	21	7	0.75
hsa-miR-3622a-5p	22	13	0.628571	hsa-miR-149-5p	66	391	0.14442
hsa-miR-149-5p	60	859	0.065288	hsa-miR-3690	10	12	0.454545
hsa-miR-34c-5p	48	866	0.052516	hsa-miR-34c-5p	41	195	0.173729
hsa-miR-381-3p	500	2219	0.183891	hsa-miR-381-3p	471	856	0.354936
hsa-miR-378i	5961	0	1	hsa-miR-378i	2362	0	1
hsa-miR-23c	14069	0	1	hsa-miR-23c	8499	4	0.99953
hsa-miR-221-3p	16969	104697	0.139472	hsa-miR-221-3p	6073	14140	0.30045
hsa-miR-374b-3p	20	152	0.116279	hsa-miR-374b-3p	24	44	0.352941
hsa-miR-6503-3p	7	4	0.636364	hsa-miR-185-5p	14	37	0.27451
hsa-miR-652-3p	5	169	0.028736	hsa-miR-6503-3p	5	3	0.625
hsa-miR-873-5p	87	653	0.117568	hsa-miR-17-5p	26	323	0.074499
hsa-miR-2114-5p	5	25	0.166667	hsa-miR-873-5p	17	41	0.293103
hsa-miR-92b-3p	1025	5314	0.161697	hsa-miR-1180	5	141	0.034247
hsa-miR-542-3p	42	419	0.091106	hsa-miR-92b-3p	6365	12431	0.338636
hsa-miR-374b-5p	134	2015	0.062355	hsa-miR-4662a-5p	7	14	0.333333
hsa-miR-29c-5p	22	194	0.101852	hsa-miR-708-3p	5	49	0.092593
hsa-let-7i-5p	10267	59165	0.147871	hsa-miR-542-3p	24	54	0.307692
hsa-miR-33a-5p	50	41	0.549451	hsa-miR-374b-5p	92	1026	0.08229
hsa-miR-30c-1-3p	8	370	0.021164	hsa-miR-29c-5p	17	119	0.125
hsa-miR-589-5p	10	213	0.044843	hsa-let-7i-5p	13283	31145	0.298978
hsa-miR-548w	19	8	0.703704	hsa-miR-33a-5p	24	16	0.6
hsa-miR-154-5p	11	65	0.144737	hsa-miR-30c-1-3p	11	158	0.065089
hsa-miR-181c-3p	43	1143	0.036256	hsa-miR-589-5p	19	248	0.071161
hsa-miR-181a-2-3p	65	1696	0.036911	hsa-miR-548w	8	6	0.571429
hsa-miR-127-3p	1586	64078	0.024153	hsa-miR-154-5p	7	10	0.411765
hsa-miR-654-3p	34	1062	0.031022	hsa-miR-561-5p	13	102	0.113043
hsa-miR-335-3p	93	358	0.206208	hsa-miR-181c-3p	25	570	0.042017
hsa-miR-23b-3p	3866	16642	0.188512	hsa-miR-181a-2-3p	14	794	0.017327
hsa-miR-3613-5p	11	60	0.15493	hsa-miR-127-3p	8215	32714	0.200713
hsa-miR-125b-5p	93312	43798	0.680563	hsa-miR-654-3p	68	921	0.068756
hsa-miR-429	24	2256	0.010526	hsa-miR-335-3p	110	285	0.278481
hsa-miR-133a	3044	12930	0.19056	hsa-miR-23b-3p	3231	9628	0.251264
hsa-miR-200b-5p	13	105	0.110169	hsa-miR-3613-5p	17	50	0.253731
hsa-miR-548d-5p	99	3	0.970588	hsa-miR-125b-5p	87876	35134	0.714381
hsa-miR-184	86	1895	0.043412	hsa-miR-429	256	2253	0.102033
hsa-miR-23a-3p	1126	5690	0.1652	hsa-miR-133a	4222	4997	0.457967
hsa-miR-143-3p	149459	22264010	0.006668	hsa-miR-200b-5p	60	109	0.35503
hsa-miR-378c	104	927	0.100873	hsa-miR-548d-5p	19	5	0.791667
hsa-miR-135b-5p	340	1	0.997067	hsa-miR-671-3p	32	552	0.054795
hsa-miR-195-5p	389	6361	0.05763	hsa-miR-18a-5p	5	21	0.192308
hsa-miR-7-1-3p	6	46	0.115385	hsa-miR-9-5p	273	458	0.373461
hsa-miR-125a-5p	30012	93617	0.242759	hsa-miR-184	10	229	0.041841
hsa-miR-10b-5p	386648	3119621	0.110273	hsa-miR-210	32	120	0.210526
hsa-miR-148b-5p	16	373	0.041131	hsa-miR-23a-3p	1210	4252	0.221531
hsa-miR-4454	27	274	0.089701	hsa-miR-143-3p	317299	15185295	0.020467
hsa-miR-374a-5p	124	1348	0.084239	hsa-miR-378c	37	378	0.089157
hsa-miR-423-3p	422	3697	0.102452	hsa-miR-135b-5p	179	10	0.94709
hsa-miR-487b	12	93	0.114286	hsa-miR-195-5p	1128	4978	0.184736
hsa-miR-450b-5p	57	340	0.143577	hsa-miR-7-1-3p	7	37	0.159091
hsa-miR-146a-5p	1965	12860	0.132546	hsa-miR-125a-5p	79290	143156	0.356446
hsa-miR-3960	5	0	1	hsa-miR-10b-5p	509301	3185846	0.13783
hsa-miR-28-3p	4866	32383	0.130634	hsa-miR-148b-5p	35	219	0.137795
hsa-miR-425-3p	13	250	0.04943	hsa-miR-1269a	9	1	0.9
hsa-miR-31-5p	10	122	0.075758	hsa-miR-4454	23	86	0.211009
hsa-miR-10a-5p	3003090	362755	0.892225	hsa-miR-374a-5p	81	927	0.080357
hsa-miR-452-5p	5	331	0.014881	hsa-miR-423-3p	312	4487	0.065014
hsa-miR-181d	9763	2538	0.793675	hsa-miR-487b	16	51	0.238806
hsa-let-7a-3p	96	187	0.339223	hsa-miR-450b-5p	44	118	0.271605
hsa-miR-504	8	150	0.050633	hsa-miR-331-5p	6	40	0.130435
hsa-miR-744-5p	62	1252	0.047184	hsa-miR-146a-5p	1799	25145	0.066768
hsa-miR-99a-5p	609250	316881	0.657844	hsa-miR-3960	11	0	1
hsa-miR-532-3p	14	79	0.150538	hsa-miR-28-3p	8292	20390	0.289101
hsa-miR-196a-5p	11170	19	0.998302	hsa-miR-425-3p	6	144	0.04
hsa-miR-548j	6	2	0.75	hsa-miR-31-5p	62	439	0.123752
hsa-miR-3130-5p	16	2	0.888889	hsa-miR-10a-5p	3051866	422771	0.878327
hsa-miR-126-5p	1224	72995	0.016492	hsa-miR-452-5p	9	112	0.07438
hsa-miR-4677-3p	12	79	0.131868	hsa-miR-181d	3988	1442	0.734438
hsa-miR-490-3p	18	275	0.061433	hsa-let-7a-3p	128	134	0.48855
hsa-miR-497-5p	185	2793	0.062122	hsa-miR-504	19	120	0.136691
hsa-miR-378d	39	216	0.152941	hsa-miR-493-3p	5	52	0.087719
hsa-miR-101-3p	4614	34221	0.11881	hsa-miR-744-5p	21	514	0.039252
hsa-miR-101-5p	11	128	0.079137	hsa-miR-99a-5p	624002	218807	0.740384
hsa-miR-424-5p	7	1847	0.003776	hsa-miR-532-3p	20	22	0.47619
hsa-miR-194-5p	216	460	0.319527	hsa-miR-196a-5p	7771	163	0.979456
hsa-miR-422a	17	0	1	hsa-miR-299-3p	6	27	0.181818
hsa-miR-152	84	2062	0.039143	hsa-miR-126-5p	1478	59860	0.024096
hsa-miR-376c-3p	70	104	0.402299	hsa-miR-4677-3p	29	41	0.414286
hsa-miR-363-3p	2215	10776	0.170503	hsa-miR-1247-5p	12	183	0.061538
hsa-miR-193b-3p	32	817	0.037691	hsa-miR-497-5p	93	1901	0.04664
hsa-miR-148a-5p	217	3447	0.059225	hsa-miR-378d	6	85	0.065934
hsa-miR-873-3p	11	279	0.037931	hsa-miR-101-3p	8464	14534	0.368032
hsa-miR-30b-5p	490	4368	0.100865	hsa-miR-101-5p	9	55	0.140625
hsa-miR-362-3p	5	44	0.102041	hsa-miR-194-5p	129	157	0.451049
hsa-miR-205-5p	9067	43611	0.172121	hsa-miR-422a	9	0	1
hsa-miR-548x-5p	15	0	1	hsa-miR-152	36	1167	0.029925
hsa-miR-378h	48	0	1	hsa-miR-376c-3p	18	38	0.321429
hsa-miR-375	3154	55174	0.054074	hsa-miR-363-3p	4110	8837	0.317448
hsa-miR-99b-5p	44243	520714	0.078312	hsa-miR-193b-3p	84	388	0.177966
hsa-miR-146b-5p	8507	68275	0.110794	hsa-miR-148a-5p	953	3612	0.208762
hsa-miR-548au-5p	11	17	0.392857	hsa-miR-30b-5p	334	2517	0.117152
hsa-miR-378a-3p	2206	24958	0.08121	hsa-miR-205-5p	6950	12648	0.354628
hsa-miR-493-5p	280	1706	0.140987	hsa-miR-6503-5p	5	10	0.333333
hsa-miR-133b	6	359	0.016438	hsa-miR-378h	31	0	1
hsa-miR-221-5p	248	3941	0.059203	hsa-miR-375	16736	138185	0.108029
hsa-miR-629-5p	31	137	0.184524	hsa-miR-99b-5p	37490	555874	0.063182
hsa-miR-24-3p	6092	16957	0.264306	hsa-miR-146b-5p	6132	59126	0.093965
hsa-miR-15b-5p	62	458	0.119231	hsa-miR-548au-5p	5	9	0.357143
hsa-miR-223-3p	6	794	0.0075	hsa-miR-378a-3p	1243	10158	0.109026
hsa-miR-142-5p	1737	12509	0.121929	hsa-miR-493-5p	203	464	0.304348
hsa-miR-328	61	1265	0.046003	hsa-miR-133b	17	91	0.157407
hsa-let-7f-2-3p	164	25	0.867725	hsa-miR-221-5p	13	1252	0.010277
hsa-miR-6511a-3p	64	24	0.727273	hsa-miR-629-5p	24	63	0.275862
hsa-miR-941	1064	4128	0.204931	hsa-miR-24-3p	9315	9082	0.506333
hsa-miR-889	11	301	0.035256	hsa-miR-15b-5p	19	399	0.045455
hsa-miR-330-3p	22	38	0.366667	hsa-miR-223-3p	88	432	0.169231
hsa-miR-28-5p	320	5338	0.056557	hsa-miR-142-5p	4928	9895	0.332456
hsa-miR-4448	21	0	1	hsa-miR-328	22	496	0.042471
hsa-miR-451a	93	3015	0.029923	hsa-let-7f-2-3p	94	10	0.903846
hsa-miR-126-3p	651	5506	0.105733	hsa-miR-139-5p	5	43	0.104167
hsa-miR-150-5p	219	1283	0.145806	hsa-miR-6511a-3p	28	20	0.583333
hsa-miR-361-3p	88	718	0.109181	hsa-miR-486-3p	7	33	0.175
hsa-let-7e-5p	151335	8809	0.944993	hsa-miR-941	1564	3890	0.286762
hsa-miR-200a-5p	19	122	0.134752	hsa-miR-889	41	160	0.20398
hsa-miR-4510	49	0	1	hsa-miR-330-3p	6	19	0.24
hsa-miR-628-5p	13	134	0.088435	hsa-miR-28-5p	92	4385	0.020549
hsa-miR-548n	5	2	0.714286	hsa-miR-4448	20	0	1
hsa-let-7b-3p	6	39	0.133333	hsa-miR-3065-3p	5	12	0.294118
hsa-miR-146b-3p	5	264	0.018587	hsa-miR-10a-3p	5	23	0.178571
hsa-miR-182-5p	11862	67711	0.149071	hsa-miR-451a	44	1366	0.031206
hsa-miR-103a-3p	7385	27109	0.214095	hsa-miR-126-3p	1232	3773	0.246154
hsa-miR-548ak	8	5	0.615385	hsa-miR-150-5p	776	1276	0.378168
hsa-let-7i-3p	11	72	0.13253	hsa-miR-361-3p	189	446	0.297638
hsa-miR-345-5p	140	1719	0.075309	hsa-let-7e-5p	92280	3395	0.964515
hsa-miR-199b-5p	421	10058	0.040176	hsa-miR-200a-5p	54	95	0.362416
hsa-let-7g-3p	5	20	0.2	hsa-miR-4510	23	0	1
hsa-miR-769-5p	141	3389	0.039943	hsa-miR-628-5p	27	79	0.254717
hsa-miR-411-3p	9	5	0.642857	hsa-let-7b-3p	7	32	0.179487
hsa-miR-548c-5p	22	20	0.52381	hsa-miR-146b-3p	34	218	0.134921
hsa-miR-27b-5p	67	2924	0.022401	hsa-miR-182-5p	43887	95920	0.313911
hsa-miR-19a-3p	8255	626	0.929512	hsa-miR-100-3p	19	76	0.2
hsa-miR-32-5p	17	84	0.168317	hsa-miR-103a-3p	8808	7507	0.539871
hsa-miR-132-5p	6	85	0.065934	hsa-let-7i-3p	9	36	0.2
hsa-miR-181b-5p	5740	9916	0.366633	hsa-miR-345-5p	128	1489	0.079159
hsa-miR-196b-5p	442	7567	0.055188	hsa-miR-342-5p	7	70	0.090909
hsa-miR-199a-3p	9854	100216	0.089525	hsa-miR-199b-5p	412	5741	0.066959
hsa-miR-574-3p	178	3800	0.044746	hsa-miR-769-5p	109	2368	0.044005
hsa-miR-128	50	721	0.064851	hsa-miR-548c-5p	22	8	0.733333
hsa-miR-145-3p	1194	29336	0.039109	hsa-miR-27b-5p	72	1388	0.049315
hsa-miR-342-3p	1663	6283	0.209288	hsa-miR-19a-3p	1475	178	0.892317
hsa-miR-125b-1-3p	39	3004	0.012816	hsa-miR-15b-3p	8	12	0.4
hsa-miR-30d-3p	30	628	0.045593	hsa-miR-32-5p	40	107	0.272109
hsa-miR-409-5p	9	537	0.016484	hsa-miR-132-5p	5	60	0.076923
hsa-miR-1307-5p	207	266	0.437632	hsa-miR-181b-5p	3054	4034	0.430869
hsa-miR-224-5p	110	619	0.150892	hsa-miR-196b-5p	646	4922	0.11602
hsa-miR-30c-5p	2174	10372	0.173282	hsa-miR-199a-3p	11103	40463	0.215316
hsa-miR-708-5p	8	175	0.043716	hsa-miR-574-3p	337	1278	0.208669
hsa-let-7b-5p	97454	27501	0.779913	hsa-miR-128	41	992	0.03969
hsa-miR-29c-3p	19669	6517	0.751127	hsa-miR-145-3p	1928	31164	0.058262
hsa-miR-19b-3p	5985	8489	0.4135	hsa-miR-342-3p	2908	5229	0.35738
hsa-miR-455-5p	27	1029	0.025568	hsa-miR-125b-1-3p	58	2190	0.025801
hsa-let-7f-5p	375264	196379	0.656466	hsa-miR-190a	5	23	0.178571
hsa-miR-548ab	6	6	0.5	hsa-miR-30d-3p	17	461	0.035565
hsa-miR-181a-3p	20	721	0.026991	hsa-miR-409-5p	116	398	0.225681
hsa-miR-203a	70	2592	0.026296	hsa-miR-1307-5p	140	149	0.484429
hsa-miR-664a-5p	7	95	0.068627	hsa-miR-224-5p	157	327	0.32438
hsa-miR-195-3p	8	207	0.037209	hsa-miR-30c-5p	1361	5242	0.206118
hsa-miR-199a-5p	1452	11778	0.109751	hsa-miR-708-5p	5	193	0.025253
hsa-miR-34a-5p	346	3248	0.096272	hsa-let-7b-5p	41776	15245	0.732642
hsa-miR-335-5p	42	490	0.078947	hsa-miR-29c-3p	8618	3428	0.715424
hsa-let-7d-5p	1217	5210	0.189357	hsa-miR-19b-3p	3017	1547	0.661043
hsa-miR-30a-5p	147957	578926	0.20355	hsa-miR-455-5p	40	248	0.138889
hsa-miR-26a-5p	121884	982907	0.110323	hsa-let-7f-5p	290950	122316	0.704026
hsa-miR-1287	11	76	0.126437	hsa-miR-203a	202	1097	0.155504
hsa-miR-16-2-3p	15	129	0.104167	hsa-miR-664a-5p	6	45	0.117647
hsa-miR-320a	154	7489	0.020149	hsa-miR-195-3p	6	185	0.031414
hsa-miR-548aj-5p	16	0	1	hsa-miR-199a-5p	1517	7449	0.169195
hsa-miR-548ap-5p	8	0	1	hsa-miR-34a-5p	112	906	0.11002
hsa-miR-30e-5p	584026	44049	0.929867	hsa-miR-144-3p	6	38	0.136364
hsa-miR-374a-3p	98	889	0.099291	hsa-miR-335-5p	15	263	0.053957
hsa-miR-1271-5p	207	1224	0.144654	hsa-let-7d-5p	1191	2395	0.332125
hsa-miR-141-3p	2267	60095	0.036352	hsa-miR-30a-5p	101915	188231	0.351254
hsa-let-7c	47509	96634	0.329596	hsa-miR-26a-5p	121161	587729	0.170917
hsa-miR-136-3p	60	1849	0.03143	hsa-miR-1287	13	28	0.317073
hsa-miR-181a-5p	15788	197837	0.073905	hsa-miR-16-2-3p	21	72	0.225806
hsa-miR-186-5p	14863	84379	0.149765	hsa-miR-320a	524	2368	0.181189
hsa-miR-3605-5p	7	135	0.049296	hsa-miR-548aj-5p	6	2	0.75
hsa-miR-378b	193	0	1	hsa-miR-30e-5p	197478	22899	0.896092
hsa-miR-486-5p	3280	20814	0.136133	hsa-miR-374a-3p	205	381	0.349829
hsa-miR-339-3p	5	178	0.027322	hsa-miR-1271-5p	330	459	0.418251
hsa-miR-548ay-5p	25	3	0.892857	hsa-miR-141-3p	9111	88362	0.093472
hsa-miR-548c-3p	8	0	1	hsa-let-7c	33378	37249	0.472595
hsa-miR-1299	6	57	0.095238	hsa-miR-136-3p	172	647	0.210012
hsa-miR-576-5p	5	30	0.142857	hsa-miR-181a-5p	7632	103234	0.06884
hsa-miR-218-5p	174	1568	0.099885	hsa-miR-186-5p	14922	29858	0.333229
hsa-miR-369-5p	15	120	0.111111	hsa-miR-3605-5p	11	77	0.125
hsa-miR-135a-5p	50	395	0.11236	hsa-miR-378b	80	0	1
hsa-miR-1296	21	426	0.04698	hsa-miR-486-5p	7086	14774	0.324154
hsa-miR-93-5p	117	5178	0.022096	hsa-miR-339-3p	9	171	0.05
hsa-let-7a-5p	706363	157095	0.818063	hsa-miR-548ay-5p	5	3	0.625
hsa-miR-192-5p	481	16945	0.027602	hsa-miR-651	7	12	0.368421
hsa-miR-548k	27	150	0.152542	hsa-miR-1299	8	14	0.363636
hsa-miR-151b	239	1822	0.115963	hsa-miR-576-5p	12	19	0.387097
hsa-miR-29b-3p	100	863	0.103842	hsa-miR-218-5p	290	663	0.304302
hsa-miR-99a-3p	51	1447	0.034045	hsa-miR-369-5p	17	55	0.236111
hsa-miR-6511b-3p	24	17	0.585366	hsa-miR-582-5p	23	128	0.152318
hsa-miR-200c-3p	118	2835	0.039959	hsa-miR-135a-5p	110	224	0.329341
hsa-miR-301b	6	52	0.103448	hsa-miR-320b	120	263	0.313316
hsa-miR-96-5p	178	853	0.172648	hsa-miR-338-5p	24	65	0.269663
hsa-miR-200b-3p	251	4133	0.057254	hsa-miR-1296	7	187	0.036082
hsa-miR-548ar-5p	17	0	1	hsa-miR-93-5p	247	3927	0.059176
hsa-miR-92a-3p	22505	62160	0.265812	hsa-let-7a-5p	500359	95739	0.839391
hsa-miR-130b-3p	36	247	0.127208	hsa-miR-192-5p	795	9971	0.073844
hsa-miR-598	35	222	0.136187	hsa-miR-548k	28	104	0.212121
hsa-miR-548z	8	2	0.8	hsa-miR-7-5p	43	41	0.511905
hsa-miR-377-3p	5	52	0.087719	hsa-miR-151b	660	1201	0.354648
hsa-miR-17-3p	23	158	0.127072	hsa-miR-10b-3p	7	98	0.066667
hsa-miR-660-5p	160	3244	0.047004	hsa-miR-29b-3p	163	325	0.334016
hsa-miR-548i	104	15	0.87395	hsa-miR-99a-3p	115	452	0.202822
hsa-miR-199b-3p	4926	100181	0.046867	hsa-miR-6511b-3p	18	7	0.72
hsa-miR-454-3p	165	950	0.147982	hsa-miR-200c-3p	310	3743	0.076487
hsa-miR-410	116	759	0.132571	hsa-miR-301b	22	55	0.285714
hsa-miR-421	206	1398	0.128429	hsa-miR-96-5p	495	1137	0.303309
hsa-miR-151a-5p	4061	27036	0.130591	hsa-miR-130b-5p	5	121	0.039683
hsa-miR-378g	955	1	0.998954	hsa-miR-548ar-5p	9	2	0.818182
hsa-miR-641	11	126	0.080292	hsa-miR-200b-3p	778	7276	0.096598
hsa-miR-151a-3p	2661	36379	0.068161	hsa-miR-92a-3p	56932	60803	0.483561
hsa-miR-1304-3p	31	0	1	hsa-miR-130b-3p	69	141	0.328571
hsa-miR-30a-3p	3501	9271	0.274115	hsa-miR-598	50	101	0.331126
hsa-miR-136-5p	19	427	0.042601	hsa-miR-17-3p	13	141	0.084416
hsa-miR-24-1-5p	7	78	0.082353	hsa-miR-660-5p	120	1183	0.092095
hsa-miR-153	20	57	0.25974	hsa-miR-548i	32	6	0.842105
hsa-miR-26b-3p	14	455	0.029851	hsa-miR-199b-3p	5549	40454	0.120623
hsa-miR-107	1201	8902	0.118876	hsa-miR-454-3p	162	299	0.35141
hsa-miR-582-3p	36	1455	0.024145	hsa-miR-410	233	406	0.364632
hsa-miR-340-5p	704	3540	0.165881	hsa-miR-421	307	597	0.339602
hsa-miR-148a-3p	6463	218042	0.028788	hsa-miR-151a-5p	11357	20153	0.360425
hsa-miR-20b-5p	11	412	0.026005	hsa-miR-378g	407	1	0.997549
hsa-miR-1260a	7	0	1	hsa-miR-641	20	40	0.333333
hsa-miR-25-3p	3983	22524	0.150262	hsa-miR-151a-3p	1759	28579	0.05798
hsa-miR-495-3p	5	19	0.208333	hsa-miR-1304-3p	39	0	1
hsa-miR-106b-3p	63	1177	0.050806	hsa-miR-30a-3p	2437	3897	0.384749
hsa-miR-548o-5p	22	20	0.52381	hsa-miR-577	31	100	0.236641
hsa-miR-1307-3p	6	370	0.015957	hsa-miR-136-5p	15	184	0.075377
hsa-miR-376a-3p	190	1	0.994764	hsa-miR-24-1-5p	9	40	0.183673
hsa-miR-548h-3p	8	2	0.8	hsa-miR-153	132	79	0.625592
hsa-miR-204-5p	588	17839	0.03191	hsa-miR-26b-3p	57	240	0.191919
hsa-miR-409-3p	32	1514	0.020699	hsa-miR-107	1270	2107	0.376073
hsa-miR-1	36	460	0.072581	hsa-miR-582-3p	171	608	0.219512
hsa-miR-423-5p	356	4089	0.08009	hsa-miR-340-5p	657	1066	0.381312
hsa-miR-425-5p	142	697	0.169249	hsa-miR-148a-3p	13938	359780	0.037296
hsa-miR-181c-5p	1562	20815	0.069804	hsa-miR-20b-5p	28	256	0.098592
hsa-miR-212-5p	11	161	0.063953	hsa-miR-1260a	5	0	1
hsa-miR-125b-2-3p	397	14567	0.02653	hsa-miR-25-3p	6966	14895	0.31865
hsa-miR-183-5p	2749	19389	0.124176	hsa-miR-106b-3p	208	670	0.236902
hsa-miR-874	13	367	0.034211	hsa-miR-548o-5p	22	8	0.733333
hsa-miR-338-3p	85	535	0.137097	hsa-miR-376a-3p	58	2	0.966667
hsa-miR-548am-5p	22	21	0.511628	hsa-miR-204-5p	115	4238	0.026419
hsa-miR-200a-3p	54061	1779	0.968141	hsa-miR-324-3p	5	37	0.119048
hsa-miR-98-5p	1579	9032	0.148808	hsa-miR-409-3p	95	1102	0.079365
hsa-miR-501-3p	7328	7567	0.491977	hsa-miR-1	75	208	0.265018
hsa-miR-29a-3p	7734	25281	0.234257	hsa-miR-423-5p	82	2234	0.035406
hsa-miR-378f	882	0	1	hsa-miR-455-3p	6	42	0.125
hsa-miR-548f	24	0	1	hsa-miR-425-5p	292	642	0.312634
hsa-miR-362-5p	8	196	0.039216	hsa-miR-181c-5p	572	11707	0.046584
hsa-miR-140-3p	713	5907	0.107704	hsa-miR-212-5p	52	215	0.194757
hsa-miR-106b-5p	85	441	0.161597	hsa-miR-125b-2-3p	446	8592	0.049347
hsa-miR-887	24	631	0.036641	hsa-miR-183-5p	11130	27021	0.291735
hsa-miR-15a-5p	194	3286	0.055747	hsa-miR-874	88	273	0.243767
hsa-miR-379-5p	11	110	0.090909	hsa-miR-548am-5p	22	8	0.733333
hsa-miR-548as-5p	35	0	1	hsa-miR-338-3p	445	762	0.368683
hsa-miR-484	30	431	0.065076	hsa-miR-200a-3p	80182	2314	0.97195
hsa-miR-26b-5p	3425	90390	0.036508	hsa-miR-98-5p	1854	4486	0.292429
hsa-miR-369-3p	6	40	0.130435	hsa-miR-501-3p	5390	4518	0.544005
hsa-miR-147a	5	0	1	hsa-miR-29a-3p	5865	10820	0.351513
hsa-miR-132-3p	5	108	0.044248	hsa-miR-183-3p	7	11	0.388889
hsa-let-7g-5p	10196	56075	0.153853	hsa-miR-378f	350	0	1
hsa-miR-365b-3p	9	613	0.014469	hsa-miR-140-3p	1189	2907	0.290283
hsa-miR-214-3p	113	716	0.136309	hsa-miR-106b-5p	106	306	0.257282
hsa-miR-432-5p	44	333	0.116711	hsa-miR-887	65	215	0.232143
hsa-miR-628-3p	8	118	0.063492	hsa-miR-15a-5p	42	2609	0.015843
hsa-miR-21-5p	32817	186767	0.149451	hsa-miR-379-5p	22	45	0.328358
hsa-miR-27b-3p	56353	1248942	0.043173	hsa-miR-548as-5p	14	0	1
hsa-miR-197-3p	31	207	0.130252	hsa-miR-484	82	745	0.099154
hsa-miR-155-5p	224	4054	0.052361	hsa-miR-625-5p	11	25	0.305556
hsa-miR-532-5p	549	9282	0.055844	hsa-miR-26b-5p	2947	41700	0.066007
hsa-miR-24-2-5p	11	134	0.075862	hsa-miR-369-3p	9	35	0.204545
hsa-miR-378a-5p	15	120	0.111111	hsa-miR-147a	12	0	1
hsa-miR-548g-5p	15	0	1	hsa-let-7g-5p	13056	27477	0.322108
hsa-miR-548h-5p	30	26	0.535714	hsa-miR-365b-3p	95	353	0.212054
hsa-let-7d-3p	32	514	0.058608	hsa-miR-214-3p	127	357	0.262397
hsa-miR-145-5p	3825	147282	0.025313	hsa-miR-432-5p	78	175	0.3083
hsa-miR-20a-5p	34	555	0.057725	hsa-miR-628-3p	20	88	0.185185
hsa-miR-106a-5p	5	99	0.048077	hsa-miR-21-5p	59462	142036	0.2951
hsa-miR-130a-3p	2682	17406	0.133513	hsa-miR-27b-3p	146459	538439	0.213841
hsa-miR-21-3p	189	7519	0.02452	hsa-miR-197-3p	40	125	0.242424
hsa-miR-222-3p	5479	34262	0.137868	hsa-miR-155-5p	98	1686	0.054933
hsa-miR-2355-5p	9	51	0.15	hsa-miR-532-5p	196	3022	0.060907
hsa-miR-148b-3p	339	2343	0.126398	hsa-miR-24-2-5p	20	61	0.246914
hsa-miR-100-5p	368394	526933	0.411463	hsa-miR-378a-5p	19	50	0.275362
hsa-miR-500a-3p	7754	6943	0.527591	hsa-let-7d-3p	85	418	0.168986
hsa-miR-142-3p	40	336	0.106383	hsa-miR-145-5p	13789	40847	0.252379
hsa-miR-22-3p	7848	341420	0.02247	hsa-miR-20a-5p	63	467	0.118868
hsa-miR-16-5p	2732	71428	0.036839	hsa-miR-130a-3p	2751	4770	0.365776
hsa-miR-411-5p	544	2657	0.169947	hsa-miR-21-3p	403	7342	0.052034
hsa-miR-664a-3p	118	915	0.11423	hsa-miR-222-3p	3956	8474	0.318262
hsa-miR-214-5p	20	382	0.049751	hsa-miR-2355-5p	6	8	0.428571
hsa-miR-143-5p	434	1155	0.273128	hsa-miR-148b-3p	657	1615	0.289173
hsa-miR-215	9	39	0.1875	hsa-miR-590-3p	5	42	0.106383
hsa-miR-301a-3p	249	1408	0.150272	hsa-miR-100-5p	271201	562562	0.325273
hsa-miR-365a-3p	9	613	0.014469	hsa-miR-500a-3p	5478	3536	0.607721
hsa-miR-27a-3p	1018	21199	0.045821	hsa-miR-142-3p	52	216	0.19403
hsa-miR-191-5p	52938	330686	0.137994	hsa-miR-22-3p	43487	156739	0.21719
hsa-miR-33b-5p	7	57	0.109375	hsa-miR-16-5p	15321	34674	0.306451
				hsa-miR-411-5p	577	1475	0.281189
				hsa-miR-4485	14	234	0.056452
				hsa-miR-664a-3p	34	329	0.093664
				hsa-miR-143-5p	349	664	0.344521
				hsa-miR-215	6	46	0.115385
				hsa-miR-1247-3p	5	55	0.083333
				hsa-miR-301a-3p	217	515	0.296448
				hsa-miR-365a-3p	95	353	0.212054
				hsa-miR-27a-3p	3468	12455	0.217798
				hsa-miR-190b	16	73	0.179775
				hsa-miR-141-5p	131	421	0.237319
				hsa-miR-3912	14	35	0.285714
				hsa-miR-191-5p	169744	273365	0.383075

## Sheet: Q5
N				T
miRNA	Count with base edit	Count without base edit	Count with base edit/Total	miRNA	Count with base edit	Count without base edit	Count with base edit/Total
hsa-miR-196b-5p	422	983	0.300356	hsa-miR-140-5p	5	176	0.027624
hsa-miR-181b-5p	1928	1961	0.495757	hsa-miR-361-5p	384	2400	0.137931
hsa-miR-361-5p	154	844	0.154309	hsa-miR-193a-3p	5	51	0.089286
hsa-miR-199a-3p	646	6339	0.092484	hsa-miR-502-3p	452	511	0.469367
hsa-miR-574-3p	19	393	0.046117	hsa-miR-30d-5p	330198	79913	0.805143
hsa-miR-134	61	96	0.388535	hsa-miR-30c-2-3p	63	678	0.08502
hsa-miR-128	47	229	0.17029	hsa-miR-30e-3p	7705	4318	0.640855
hsa-miR-6716-3p	15	17	0.46875	hsa-miR-149-5p	219	1426	0.133131
hsa-miR-342-3p	667	2270	0.227102	hsa-miR-34c-5p	56	327	0.146214
hsa-miR-145-3p	500	9700	0.04902	hsa-miR-381-3p	1450	2832	0.338627
hsa-miR-502-3p	323	96	0.770883	hsa-miR-378i	4226	0	1
hsa-miR-30d-5p	85047	17008	0.833345	hsa-miR-23c	13370	5	0.999626
hsa-miR-125b-1-3p	72	1491	0.046065	hsa-miR-221-3p	10985	24889	0.306211
hsa-miR-1307-5p	191	182	0.512064	hsa-miR-4999-5p	7	4	0.636364
hsa-miR-30c-2-3p	41	1483	0.026903	hsa-miR-374b-3p	26	50	0.342105
hsa-miR-3909	17	48	0.261538	hsa-miR-185-5p	19	75	0.202128
hsa-miR-30e-3p	12895	6167	0.676477	hsa-miR-652-3p	12	161	0.069364
hsa-miR-30c-5p	530	2012	0.208497	hsa-miR-3615	10	60	0.142857
hsa-miR-224-5p	27	147	0.155172	hsa-miR-17-5p	48	392	0.109091
hsa-miR-149-5p	46	81	0.362205	hsa-miR-873-5p	72	133	0.35122
hsa-let-7b-5p	43137	9103	0.825747	hsa-miR-92b-3p	5675	10709	0.346375
hsa-miR-29c-3p	1954	561	0.776938	hsa-miR-4662a-5p	7	15	0.318182
hsa-miR-19b-3p	412	361	0.532988	hsa-miR-222-5p	5	9	0.357143
hsa-miR-381-3p	83	543	0.132588	hsa-miR-708-3p	6	32	0.157895
hsa-let-7f-5p	292189	168966	0.633603	hsa-miR-542-3p	12	87	0.121212
hsa-miR-378i	2802	0	1	hsa-miR-374b-5p	121	1268	0.087113
hsa-miR-23c	5757	0	1	hsa-miR-29c-5p	20	124	0.138889
hsa-miR-221-3p	4672	21084	0.181395	hsa-miR-1468	18	821	0.021454
hsa-miR-181a-3p	11	256	0.041199	hsa-let-7i-5p	18854	45774	0.291731
hsa-miR-365b-5p	14	0	1	hsa-miR-33a-5p	18	18	0.5
hsa-miR-195-3p	19	728	0.025435	hsa-miR-30c-1-3p	20	312	0.060241
hsa-miR-34a-5p	421	331	0.55984	hsa-miR-589-5p	18	407	0.042353
hsa-miR-199a-5p	324	1660	0.163306	hsa-miR-548w	6	3	0.666667
hsa-miR-30a-5p	29048	82834	0.259631	hsa-miR-154-5p	17	35	0.326923
hsa-let-7d-5p	1235	2919	0.297304	hsa-miR-561-5p	9	76	0.105882
hsa-miR-6503-3p	7	0	1	hsa-miR-181c-3p	22	858	0.025
hsa-miR-26a-5p	38227	115768	0.248235	hsa-miR-3913-5p	14	47	0.229508
hsa-miR-3615	11	94	0.104762	hsa-miR-181a-2-3p	64	1667	0.036973
hsa-miR-17-5p	9	58	0.134328	hsa-miR-127-3p	21154	81748	0.205574
hsa-miR-320a	726	7870	0.084458	hsa-miR-654-3p	85	1140	0.069388
hsa-miR-16-2-3p	5	63	0.073529	hsa-miR-335-3p	143	384	0.271347
hsa-miR-374a-3p	14	155	0.08284	hsa-miR-23b-3p	6429	15295	0.29594
hsa-miR-30e-5p	84820	2454	0.971882	hsa-miR-3613-5p	16	32	0.333333
hsa-miR-141-3p	12	258	0.044444	hsa-miR-5096	10	5	0.666667
hsa-miR-1271-5p	106	439	0.194495	hsa-miR-125b-5p	153000	52395	0.744906
hsa-miR-181a-5p	2788	34639	0.074492	hsa-miR-429	66	995	0.062205
hsa-let-7c	18348	43545	0.296447	hsa-miR-27a-5p	24	439	0.051836
hsa-miR-186-5p	1213	5123	0.191446	hsa-miR-133a	15224	16645	0.477706
hsa-miR-486-5p	110527	701976	0.136033	hsa-miR-200b-5p	30	42	0.416667
hsa-miR-378b	174	0	1	hsa-miR-548d-5p	28	4	0.875
hsa-miR-92b-3p	5789	18359	0.23973	hsa-miR-671-3p	83	1116	0.069224
hsa-miR-339-3p	18	32	0.36	hsa-miR-9-5p	138	248	0.357513
hsa-miR-222-5p	8	27	0.228571	hsa-miR-184	8	386	0.020305
hsa-miR-542-3p	13	12	0.52	hsa-miR-210	89	334	0.210402
hsa-miR-374b-5p	20	115	0.148148	hsa-miR-769-3p	5	13	0.277778
hsa-miR-29c-5p	97	38	0.718519	hsa-miR-23a-3p	2547	6868	0.270526
hsa-miR-1468	9	517	0.01711	hsa-miR-143-3p	166845	11060631	0.01486
hsa-let-7i-5p	8119	42664	0.159876	hsa-miR-378c	48	328	0.12766
hsa-miR-33a-5p	16	4	0.8	hsa-miR-135b-5p	337	13	0.962857
hsa-miR-1299	8	74	0.097561	hsa-miR-195-5p	1120	4883	0.186573
hsa-miR-589-5p	5	151	0.032051	hsa-miR-7-1-3p	15	53	0.220588
hsa-miR-653	15	0	1	hsa-miR-125a-5p	107887	191844	0.359946
hsa-miR-576-5p	7	37	0.159091	hsa-miR-10b-5p	481170	3170204	0.131778
hsa-miR-218-5p	10	94	0.096154	hsa-miR-2110	15	28	0.348837
hsa-miR-181c-3p	9	92	0.089109	hsa-miR-148b-5p	56	267	0.173375
hsa-miR-320b	62	918	0.063265	hsa-let-7a-2-3p	6	4	0.6
hsa-miR-181a-2-3p	16	352	0.043478	hsa-miR-4454	49	165	0.228972
hsa-miR-127-3p	3260	25488	0.113399	hsa-miR-374a-5p	104	779	0.11778
hsa-miR-335-3p	8	27	0.228571	hsa-miR-423-3p	756	7725	0.08914
hsa-miR-23b-3p	2516	6482	0.279618	hsa-miR-487b	59	118	0.333333
hsa-miR-1296	24	124	0.162162	hsa-miR-450b-5p	57	124	0.314917
hsa-miR-125b-5p	80486	23169	0.77648	hsa-miR-331-5p	9	30	0.230769
hsa-miR-93-5p	35	1189	0.028595	hsa-miR-146a-5p	1013	12645	0.074169
hsa-miR-192-5p	44	2959	0.014652	hsa-miR-28-3p	14694	36524	0.286891
hsa-let-7a-5p	629853	117858	0.842375	hsa-miR-425-3p	6	61	0.089552
hsa-miR-151b	89	624	0.124825	hsa-miR-31-5p	99	795	0.110738
hsa-miR-654-5p	7	10	0.411765	hsa-miR-10a-5p	3046693	390215	0.886463
hsa-miR-133a	8378	9678	0.464001	hsa-miR-452-5p	7	135	0.049296
hsa-miR-548d-5p	14	0	1	hsa-miR-181d	8678	2435	0.780887
hsa-miR-6511b-3p	59	11	0.842857	hsa-let-7a-3p	120	169	0.415225
hsa-miR-671-3p	37	325	0.10221	hsa-miR-504	38	160	0.191919
hsa-miR-9-5p	45	393	0.10274	hsa-miR-493-3p	5	153	0.031646
hsa-miR-92a-3p	17002	29145	0.368431	hsa-miR-744-5p	50	1585	0.030581
hsa-miR-210	27	161	0.143617	hsa-miR-99a-5p	699184	285002	0.710419
hsa-miR-130b-3p	9	83	0.097826	hsa-miR-532-3p	27	59	0.313953
hsa-miR-598	30	113	0.20979	hsa-miR-196a-5p	9843	204	0.979695
hsa-miR-23a-3p	675	2409	0.218872	hsa-miR-299-3p	16	66	0.195122
hsa-miR-93-3p	12	0	1	hsa-miR-3607-3p	10	205	0.046512
hsa-miR-491-5p	9	0	1	hsa-miR-126-5p	2284	78296	0.028345
hsa-miR-143-3p	134229	15268658	0.008715	hsa-miR-4677-3p	22	47	0.318841
hsa-miR-378c	120	419	0.222635	hsa-miR-758-3p	11	28	0.282051
hsa-miR-195-5p	65	615	0.095588	hsa-miR-1247-5p	16	325	0.046921
hsa-miR-125a-5p	60206	145341	0.292906	hsa-miR-383	5	16	0.238095
hsa-miR-10b-5p	295735	3326349	0.081648	hsa-miR-497-5p	95	2049	0.04431
hsa-miR-660-5p	16	241	0.062257	hsa-miR-378d	42	49	0.461538
hsa-miR-199b-3p	323	6339	0.048484	hsa-miR-101-3p	8547	13699	0.384204
hsa-miR-454-3p	7	64	0.098592	hsa-miR-101-5p	18	87	0.171429
hsa-miR-410	31	319	0.088571	hsa-miR-194-5p	256	267	0.489484
hsa-miR-187-3p	43	179	0.193694	hsa-miR-1248	6	35	0.146341
hsa-miR-421	86	354	0.195455	hsa-miR-422a	26	0	1
hsa-miR-4454	69	24	0.741935	hsa-miR-152	66	1827	0.034865
hsa-miR-378g	430	1	0.99768	hsa-miR-376c-3p	32	67	0.323232
hsa-miR-151a-5p	2199	10897	0.167914	hsa-miR-127-5p	14	101	0.121739
hsa-miR-423-3p	500	2592	0.161708	hsa-miR-363-3p	2950	5871	0.334429
hsa-miR-331-5p	28	24	0.538462	hsa-miR-193b-3p	223	892	0.2
hsa-miR-146a-5p	119	761	0.135227	hsa-miR-148a-5p	1136	4597	0.198151
hsa-miR-151a-3p	2329	22607	0.093399	hsa-miR-873-3p	7	201	0.033654
hsa-miR-30a-3p	6782	13585	0.33299	hsa-miR-30b-5p	547	4667	0.10491
hsa-miR-1304-3p	39	0	1	hsa-miR-362-3p	6	24	0.2
hsa-miR-668	15	0	1	hsa-miR-205-5p	14468	25978	0.357712
hsa-miR-28-3p	16950	111186	0.132281	hsa-miR-320c	12	25	0.324324
hsa-miR-31-5p	18	13	0.580645	hsa-miR-548x-5p	5	0	1
hsa-miR-10a-5p	3184966	249634	0.927318	hsa-miR-378h	19	0	1
hsa-miR-181d	1981	888	0.690484	hsa-miR-1255a	8	19	0.296296
hsa-let-7a-3p	34	31	0.523077	hsa-miR-375	28854	223678	0.114259
hsa-miR-504	32	85	0.273504	hsa-miR-99b-5p	47846	616098	0.072063
hsa-miR-26b-3p	16	79	0.168421	hsa-miR-146b-5p	8563	81814	0.094748
hsa-miR-744-5p	79	844	0.08559	hsa-miR-378a-3p	2050	15804	0.11482
hsa-miR-99a-5p	423603	53116	0.88858	hsa-miR-5683	5	51	0.089286
hsa-miR-196a-5p	1340	281	0.82665	hsa-miR-493-5p	349	845	0.292295
hsa-miR-107	607	4599	0.116596	hsa-miR-133b	117	402	0.225434
hsa-miR-3607-3p	7	99	0.066038	hsa-miR-221-5p	94	2105	0.042747
hsa-miR-340-5p	274	1321	0.171787	hsa-miR-24-3p	5252	5134	0.505681
hsa-miR-126-5p	182	5827	0.030288	hsa-miR-15b-5p	20	709	0.027435
hsa-miR-148a-3p	753	15106	0.047481	hsa-miR-223-3p	66	307	0.176944
hsa-miR-3605-3p	26	74	0.26	hsa-miR-142-5p	3150	5586	0.360577
hsa-miR-4677-3p	5	37	0.119048	hsa-miR-328	39	1036	0.036279
hsa-miR-25-3p	2597	13688	0.159472	hsa-let-7f-2-3p	149	4	0.973856
hsa-miR-106b-3p	34	720	0.045093	hsa-miR-139-5p	12	252	0.045455
hsa-miR-1247-5p	37	344	0.097113	hsa-miR-6511a-3p	108	29	0.788321
hsa-miR-490-3p	26	56	0.317073	hsa-miR-486-3p	38	80	0.322034
hsa-miR-497-5p	24	286	0.077419	hsa-miR-941	1868	4257	0.30498
hsa-miR-378d	74	206	0.264286	hsa-miR-181b-3p	5	0	1
hsa-miR-101-3p	886	4167	0.175341	hsa-miR-889	75	278	0.212465
hsa-miR-409-3p	10	1445	0.006873	hsa-miR-330-3p	17	33	0.34
hsa-miR-139-3p	13	40	0.245283	hsa-miR-28-5p	190	6075	0.030327
hsa-miR-204-5p	882	10711	0.07608	hsa-miR-625-3p	7	24	0.225806
hsa-miR-3940-3p	17	13	0.566667	hsa-miR-4448	28	0	1
hsa-miR-194-5p	28	0	1	hsa-miR-340-3p	7	114	0.057851
hsa-miR-423-5p	770	6899	0.100404	hsa-miR-451a	542	15660	0.033453
hsa-miR-422a	44	0	1	hsa-miR-126-3p	1828	4820	0.27497
hsa-miR-425-5p	43	15	0.741379	hsa-miR-150-5p	1021	1871	0.353043
hsa-miR-181c-5p	257	3119	0.076126	hsa-miR-361-3p	260	527	0.330368
hsa-miR-127-5p	8	58	0.121212	hsa-miR-200a-5p	29	56	0.341176
hsa-miR-212-5p	106	141	0.42915	hsa-let-7e-5p	142264	7492	0.949972
hsa-miR-125b-2-3p	495	7434	0.062429	hsa-miR-539-3p	5	44	0.102041
hsa-miR-363-3p	59	206	0.222642	hsa-miR-4510	99	0	1
hsa-miR-183-5p	146	843	0.147624	hsa-miR-628-5p	28	63	0.307692
hsa-miR-193b-3p	43	297	0.126471	hsa-miR-548n	11	3	0.785714
hsa-miR-874	52	215	0.194757	hsa-let-7b-3p	22	58	0.275
hsa-miR-338-3p	12	109	0.099174	hsa-miR-146b-3p	88	531	0.142165
hsa-miR-148a-5p	8	404	0.019417	hsa-miR-182-5p	50861	117207	0.302622
hsa-miR-200a-3p	212	50	0.80916	hsa-miR-100-3p	28	108	0.205882
hsa-miR-30b-5p	17	369	0.044041	hsa-let-7e-3p	6	128	0.044776
hsa-miR-205-5p	269	1165	0.187587	hsa-miR-103a-3p	14143	12089	0.539151
hsa-miR-323b-3p	6	27	0.181818	hsa-miR-659-5p	8	31	0.205128
hsa-miR-98-5p	815	5147	0.136699	hsa-miR-5588-5p	14	25	0.358974
hsa-miR-501-3p	1754	3824	0.31445	hsa-let-7i-3p	26	23	0.530612
hsa-miR-29a-3p	1133	2319	0.328216	hsa-miR-345-5p	183	2098	0.080228
hsa-miR-378f	401	0	1	hsa-miR-199b-5p	860	11010	0.072452
hsa-miR-378h	112	0	1	hsa-miR-769-5p	206	3374	0.057542
hsa-miR-375	613	8502	0.067252	hsa-miR-411-3p	19	12	0.612903
hsa-miR-99b-5p	131650	842637	0.135124	hsa-miR-548c-5p	6	6	0.5
hsa-miR-146b-5p	1175	8640	0.119715	hsa-miR-27b-5p	106	1863	0.053834
hsa-miR-378a-3p	6015	21035	0.222366	hsa-miR-19a-3p	2147	211	0.910517
hsa-miR-106b-5p	183	74	0.712062	hsa-miR-15b-3p	8	15	0.347826
hsa-miR-140-3p	613	4157	0.128512	hsa-miR-32-5p	34	83	0.290598
hsa-miR-493-5p	11	97	0.101852	hsa-miR-132-5p	31	121	0.203947
hsa-miR-4526	10	0	1	hsa-miR-181b-5p	5433	8765	0.38266
hsa-miR-887	13	140	0.084967	hsa-miR-196b-5p	800	6363	0.111685
hsa-miR-133b	43	156	0.21608	hsa-miR-199a-3p	15806	57466	0.215717
hsa-miR-221-5p	86	1290	0.0625	hsa-miR-574-3p	1000	3132	0.242014
hsa-miR-484	23	216	0.096234	hsa-miR-128	85	1277	0.062408
hsa-miR-3126-5p	12	11	0.521739	hsa-miR-134	37	321	0.103352
hsa-miR-26b-5p	430	5639	0.070852	hsa-miR-3653	6	52	0.103448
hsa-miR-24-3p	1366	2562	0.34776	hsa-miR-145-3p	1412	20182	0.065389
hsa-miR-132-3p	16	74	0.177778	hsa-miR-342-3p	3864	6461	0.374237
hsa-let-7g-5p	1816	8364	0.178389	hsa-miR-125b-1-3p	53	2171	0.023831
hsa-miR-365b-3p	29	106	0.214815	hsa-miR-30d-3p	40	752	0.050505
hsa-miR-142-5p	107	712	0.130647	hsa-miR-409-5p	179	568	0.239625
hsa-miR-328	61	723	0.077806	hsa-miR-1307-5p	206	195	0.513716
hsa-miR-214-3p	42	278	0.13125	hsa-miR-208b	54	182	0.228814
hsa-miR-432-5p	37	174	0.175355	hsa-miR-224-5p	172	423	0.289076
hsa-miR-330-5p	10	0	1	hsa-miR-30c-5p	2416	9621	0.200714
hsa-let-7f-2-3p	31	12	0.72093	hsa-miR-708-5p	7	92	0.070707
hsa-miR-6511a-3p	44	50	0.468085	hsa-let-7b-5p	99160	27914	0.780333
hsa-miR-486-3p	10	96	0.09434	hsa-miR-542-5p	5	11	0.3125
hsa-miR-21-5p	7140	38242	0.157331	hsa-miR-29c-3p	13407	4523	0.747741
hsa-miR-27b-3p	11473	215512	0.050545	hsa-miR-455-5p	90	466	0.161871
hsa-miR-941	760	2016	0.273775	hsa-miR-19b-3p	4034	2146	0.652751
hsa-miR-197-3p	37	146	0.202186	hsa-let-7f-5p	412958	149549	0.734138
hsa-miR-155-5p	7	170	0.039548	hsa-miR-203a	355	1837	0.161953
hsa-miR-889	14	58	0.194444	hsa-miR-664a-5p	9	87	0.09375
hsa-miR-532-5p	158	1848	0.078764	hsa-miR-195-3p	16	323	0.047198
hsa-miR-330-3p	103	45	0.695946	hsa-miR-199a-5p	2606	12584	0.17156
hsa-miR-28-5p	195	1841	0.095776	hsa-miR-34a-5p	274	1766	0.134314
hsa-let-7d-3p	91	395	0.187243	hsa-miR-144-3p	8	92	0.08
hsa-miR-4448	19	0	1	hsa-miR-335-5p	18	325	0.052478
hsa-miR-145-5p	3177	110280	0.028002	hsa-let-7d-5p	2215	4390	0.335352
hsa-miR-20a-5p	22	12	0.647059	hsa-miR-30a-5p	141941	320511	0.306931
hsa-miR-130a-3p	1169	7934	0.128419	hsa-miR-26a-5p	165010	744178	0.181492
hsa-miR-451a	67	1237	0.05138	hsa-miR-499a-5p	20	196	0.092593
hsa-miR-150-5p	83	536	0.134087	hsa-miR-1287	13	27	0.325
hsa-miR-126-3p	264	372	0.415094	hsa-miR-16-2-3p	69	236	0.22623
hsa-miR-21-3p	75	1376	0.051688	hsa-miR-320a	1452	5758	0.201387
hsa-miR-4661-5p	11	0	1	hsa-miR-548aj-5p	6	0	1
hsa-miR-361-3p	41	226	0.153558	hsa-miR-30e-5p	333403	27050	0.924956
hsa-miR-222-3p	4057	23244	0.148603	hsa-miR-374a-3p	181	366	0.330896
hsa-let-7e-5p	116611	17170	0.871656	hsa-miR-1271-5p	445	723	0.380993
hsa-miR-4510	21	0	1	hsa-miR-141-3p	6859	79823	0.079128
hsa-miR-148b-3p	38	218	0.148438	hsa-let-7c	69028	90406	0.432957
hsa-miR-100-5p	216514	392338	0.35561	hsa-miR-136-3p	319	1170	0.214238
hsa-miR-500a-3p	3885	1538	0.716393	hsa-miR-181a-5p	14920	192375	0.071975
hsa-miR-502-5p	27	0	1	hsa-miR-186-5p	22881	43015	0.347229
hsa-miR-146b-3p	6	186	0.03125	hsa-miR-339-5p	6	126	0.045455
hsa-miR-22-3p	2885	57144	0.04806	hsa-miR-486-5p	66629	140830	0.321167
hsa-miR-182-5p	1355	8346	0.139676	hsa-miR-3605-5p	17	96	0.150442
hsa-miR-16-5p	180	3711	0.046261	hsa-miR-378b	41	0	1
hsa-miR-411-5p	73	389	0.158009	hsa-miR-339-3p	33	269	0.109272
hsa-miR-103a-3p	3280	10555	0.23708	hsa-miR-548ay-5p	5	3	0.625
hsa-miR-664a-3p	16	118	0.119403	hsa-miR-651	8	22	0.266667
hsa-miR-345-5p	51	280	0.154079	hsa-miR-1299	137	219	0.384831
hsa-miR-143-5p	1826	1131	0.617518	hsa-miR-576-5p	11	32	0.255814
hsa-miR-199b-5p	70	930	0.07	hsa-miR-218-5p	547	1069	0.33849
hsa-miR-2467-5p	8	0	1	hsa-miR-369-5p	52	89	0.368794
hsa-miR-301a-3p	68	191	0.262548	hsa-miR-656	8	20	0.285714
hsa-miR-769-5p	45	1642	0.026675	hsa-miR-582-5p	19	91	0.172727
hsa-miR-27b-5p	101	1976	0.048628	hsa-miR-135a-5p	150	371	0.287908
hsa-miR-365a-3p	29	106	0.214815	hsa-miR-320b	318	709	0.30964
hsa-miR-19a-3p	370	81	0.820399	hsa-miR-338-5p	21	64	0.247059
hsa-miR-27a-3p	133	1944	0.064035	hsa-miR-1296	90	643	0.122783
hsa-miR-671-5p	15	0	1	hsa-miR-93-5p	339	5261	0.060536
hsa-miR-191-5p	20185	105901	0.160089	hsa-let-7a-5p	665832	145427	0.820739
				hsa-miR-192-5p	1444	14522	0.090442
				hsa-miR-548k	55	113	0.327381
				hsa-miR-7-5p	24	28	0.461538
				hsa-miR-151b	759	1369	0.356673
				hsa-miR-29b-3p	288	510	0.360902
				hsa-miR-654-5p	10	46	0.178571
				hsa-miR-99a-3p	228	802	0.221359
				hsa-miR-6511b-3p	28	27	0.509091
				hsa-miR-200c-3p	409	5210	0.072789
				hsa-miR-301b	6	39	0.133333
				hsa-miR-96-5p	616	1313	0.319336
				hsa-miR-130b-5p	5	104	0.045872
				hsa-miR-548e	7	26	0.212121
				hsa-miR-548ar-5p	6	0	1
				hsa-miR-200b-3p	410	3386	0.108008
				hsa-miR-92a-3p	83734	90535	0.480487
				hsa-miR-337-3p	7	21	0.25
				hsa-miR-130b-3p	94	164	0.364341
				hsa-miR-598	71	169	0.295833
				hsa-miR-548al	8	1	0.888889
				hsa-miR-377-3p	6	23	0.206897
				hsa-miR-891a	8	42	0.16
				hsa-miR-17-3p	14	158	0.081395
				hsa-miR-660-5p	218	2186	0.090682
				hsa-miR-548i	24	6	0.8
				hsa-miR-199b-3p	7902	57430	0.120951
				hsa-miR-454-3p	185	405	0.313559
				hsa-miR-4449	8	350	0.022346
				hsa-miR-187-3p	19	252	0.070111
				hsa-miR-410	411	690	0.373297
				hsa-miR-421	381	722	0.345422
				hsa-miR-151a-5p	14724	25845	0.362937
				hsa-miR-378g	346	4	0.988571
				hsa-miR-641	10	25	0.285714
				hsa-miR-144-5p	5	439	0.011261
				hsa-miR-151a-3p	2414	39903	0.057046
				hsa-miR-379-3p	19	16	0.542857
				hsa-miR-1304-3p	54	1	0.981818
				hsa-miR-30a-3p	4858	10633	0.313601
				hsa-miR-577	6	34	0.15
				hsa-miR-136-5p	32	364	0.080808
				hsa-miR-24-1-5p	14	31	0.311111
				hsa-miR-153	124	126	0.496
				hsa-miR-26b-3p	144	443	0.245315
				hsa-miR-494	5	8	0.384615
				hsa-miR-107	2092	3422	0.379398
				hsa-miR-582-3p	130	454	0.222603
				hsa-miR-340-5p	1130	1757	0.39141
				hsa-miR-148a-3p	16826	445075	0.036428
				hsa-miR-20b-5p	27	151	0.151685
				hsa-miR-1260a	10	0	1
				hsa-miR-495-3p	8	12	0.4
				hsa-miR-25-3p	9534	21045	0.311783
				hsa-miR-106b-3p	294	949	0.236525
				hsa-miR-548o-5p	6	6	0.5
				hsa-miR-1307-3p	25	476	0.0499
				hsa-miR-1269b	5	0	1
				hsa-miR-376a-3p	80	2	0.97561
				hsa-miR-548aq-3p	12	0	1
				hsa-miR-204-5p	315	8686	0.034996
				hsa-miR-409-3p	151	2137	0.065997
				hsa-miR-3065-5p	9	11	0.45
				hsa-miR-1	71	192	0.269962
				hsa-miR-455-3p	7	53	0.116667
				hsa-miR-423-5p	316	6110	0.049175
				hsa-miR-425-5p	376	741	0.336616
				hsa-miR-181c-5p	894	15896	0.053246
				hsa-miR-212-5p	96	343	0.218679
				hsa-miR-125b-2-3p	740	15157	0.04655
				hsa-miR-183-5p	12504	30028	0.29399
				hsa-miR-874	161	409	0.282456
				hsa-miR-548am-5p	6	6	0.5
				hsa-miR-338-3p	320	574	0.357942
				hsa-miR-200a-3p	72946	1221	0.983537
				hsa-miR-98-5p	2629	6181	0.298411
				hsa-miR-501-3p	8870	6038	0.594983
				hsa-miR-574-5p	14	268	0.049645
				hsa-miR-29a-3p	9459	16062	0.370636
				hsa-miR-378f	284	0	1
				hsa-miR-223-5p	9	27	0.25
				hsa-miR-140-3p	2011	4688	0.300194
				hsa-miR-106b-5p	126	332	0.275109
				hsa-miR-505-3p	15	153	0.089286
				hsa-miR-887	81	324	0.2
				hsa-miR-15a-5p	102	2873	0.034286
				hsa-miR-379-5p	20	47	0.298507
				hsa-miR-548as-5p	12	0	1
				hsa-miR-484	151	1320	0.102651
				hsa-miR-625-5p	23	29	0.442308
				hsa-miR-26b-5p	4495	62689	0.066906
				hsa-miR-132-3p	27	319	0.078035
				hsa-let-7g-5p	18594	36774	0.335826
				hsa-miR-365b-3p	121	428	0.220401
				hsa-miR-4757-3p	5	13	0.277778
				hsa-miR-214-3p	233	578	0.2873
				hsa-miR-432-5p	180	426	0.29703
				hsa-miR-6724-5p	21	5	0.807692
				hsa-miR-628-3p	16	109	0.128
				hsa-miR-21-5p	56130	128916	0.30333
				hsa-miR-27b-3p	205822	776709	0.209481
				hsa-miR-197-3p	142	303	0.319101
				hsa-miR-155-5p	79	1441	0.051974
				hsa-miR-532-5p	457	5790	0.073155
				hsa-miR-24-2-5p	33	85	0.279661
				hsa-miR-378a-5p	24	61	0.282353
				hsa-miR-548g-5p	5	0	1
				hsa-miR-1185-1-3p	6	15	0.285714
				hsa-miR-548h-5p	80	0	1
				hsa-miR-433	6	19	0.24
				hsa-let-7d-3p	136	1137	0.106834
				hsa-miR-145-5p	14800	40889	0.265762
				hsa-miR-20a-5p	59	421	0.122917
				hsa-miR-130a-3p	4108	7219	0.362673
				hsa-miR-21-3p	314	4534	0.064769
				hsa-miR-222-3p	7825	16908	0.316379
				hsa-miR-148b-3p	845	2758	0.234527
				hsa-miR-590-3p	6	35	0.146341
				hsa-miR-100-5p	356290	603746	0.371121
				hsa-miR-500a-3p	7656	6505	0.54064
				hsa-miR-142-3p	36	197	0.154506
				hsa-miR-22-3p	54071	195537	0.216624
				hsa-miR-16-5p	19889	45256	0.305304
				hsa-miR-411-5p	1112	3214	0.25705
				hsa-miR-4485	44	663	0.062235
				hsa-miR-664a-3p	57	505	0.101423
				hsa-miR-214-5p	6	352	0.01676
				hsa-miR-143-5p	538	832	0.392701
				hsa-miR-215	6	27	0.181818
				hsa-miR-1247-3p	12	85	0.123711
				hsa-miR-301a-3p	287	593	0.326136
				hsa-miR-365a-3p	121	428	0.220401
				hsa-miR-27a-3p	2365	8539	0.216893
				hsa-miR-1291	27	79	0.254717
				hsa-miR-190b	16	93	0.146789
				hsa-miR-1285-5p	5	5	0.5
				hsa-miR-141-5p	115	369	0.237603
				hsa-miR-191-5p	195293	302601	0.392238
				hsa-miR-33b-5p	10	5	0.666667

## Sheet: S1
N				T
miRNA	Count with base edit	Count without base edit	Count with base edit/Total	miRNA	Count with base edit	Count without base edit	Count with base edit/Total
hsa-miR-196b-5p	799	1490	0.349061	hsa-miR-196b-5p	176	1045	0.144144
hsa-miR-181b-5p	1774	7264	0.196282	hsa-miR-181b-5p	986	4005	0.197556
hsa-miR-361-5p	211	482	0.304473	hsa-miR-148a-3p	4670	351710	0.013104
hsa-miR-199a-3p	5155	6636	0.437198	hsa-miR-126-5p	68	1648	0.039627
hsa-miR-574-3p	43	362	0.106173	hsa-miR-199a-3p	164	2888	0.053735
hsa-miR-134	35	45	0.4375	hsa-miR-1260b	63	0	1
hsa-miR-128	18	245	0.068441	hsa-miR-342-3p	158	2792	0.053559
hsa-miR-1260b	30	0	1	hsa-miR-1260a	105	0	1
hsa-miR-6716-3p	5	18	0.217391	hsa-miR-502-3p	312	0	1
hsa-miR-342-3p	2330	5746	0.288509	hsa-miR-30d-5p	16839	15230	0.525087
hsa-miR-145-3p	1173	3999	0.226798	hsa-miR-25-3p	430	21195	0.019884
hsa-miR-502-3p	271	64	0.808955	hsa-miR-1307-5p	68	0	1
hsa-miR-30d-5p	58846	14960	0.797306	hsa-miR-30e-3p	1880	1748	0.518192
hsa-miR-409-5p	21	45	0.318182	hsa-miR-30c-5p	20	864	0.022624
hsa-miR-30d-3p	9	36	0.2	hsa-miR-490-3p	82	0	1
hsa-miR-1307-5p	25	34	0.423729	hsa-miR-149-5p	105	166	0.387454
hsa-miR-30c-2-3p	387	985	0.28207	hsa-miR-1269b	72	0	1
hsa-miR-30e-3p	5348	3243	0.622512	hsa-let-7b-5p	57516	14457	0.799133
hsa-miR-30c-5p	1630	1111	0.594673	hsa-miR-29c-3p	289	333	0.46463
hsa-miR-149-5p	52	312	0.142857	hsa-miR-19b-3p	1574	2791	0.360596
hsa-let-7b-5p	148420	28900	0.837018	hsa-miR-204-5p	29	3797	0.00758
hsa-miR-29c-3p	1578	640	0.711452	hsa-let-7f-5p	425243	142903	0.748475
hsa-miR-455-5p	10	172	0.054945	hsa-miR-378i	449	0	1
hsa-miR-19b-3p	3520	3033	0.537159	hsa-miR-23c	871	0	1
hsa-miR-381-3p	219	301	0.421154	hsa-miR-221-3p	105	1671	0.059122
hsa-let-7f-5p	1119181	254896	0.814497	hsa-miR-423-5p	629	16139	0.037512
hsa-miR-378i	1559	1	0.999359	hsa-miR-152	81	183	0.306818
hsa-miR-23c	2057	0	1	hsa-miR-34a-5p	116	237	0.328612
hsa-miR-221-3p	564	16804	0.032474	hsa-miR-30a-5p	16422	15824	0.509272
hsa-miR-203a	225	949	0.191652	hsa-let-7d-5p	780	2078	0.272918
hsa-miR-181a-3p	11	319	0.033333	hsa-miR-26a-5p	3488	29445	0.105912
hsa-miR-195-3p	185	444	0.294118	hsa-miR-125b-2-3p	6	4246	0.001411
hsa-miR-34a-5p	557	808	0.408059	hsa-miR-183-5p	1190	13330	0.081956
hsa-miR-199a-5p	898	776	0.53644	hsa-miR-148a-5p	123	6573	0.018369
hsa-miR-335-5p	27	31	0.465517	hsa-miR-320a	47	5608	0.008311
hsa-miR-30a-5p	42024	51374	0.449945	hsa-miR-200a-3p	6253	0	1
hsa-miR-185-5p	12	15	0.444444	hsa-miR-205-5p	162	228	0.415385
hsa-let-7d-5p	1518	4335	0.259354	hsa-miR-30e-5p	16289	705	0.958515
hsa-miR-99b-3p	6	168	0.034483	hsa-miR-141-3p	240	7046	0.03294
hsa-miR-6503-3p	5	0	1	hsa-miR-98-5p	65	2685	0.023636
hsa-miR-26a-5p	69075	76779	0.47359	hsa-miR-501-3p	1206	3266	0.269678
hsa-miR-652-3p	6	7	0.461538	hsa-miR-181a-5p	2048	39733	0.049017
hsa-miR-3615	16	69	0.188235	hsa-let-7c	37182	59881	0.383071
hsa-miR-17-5p	67	168	0.285106	hsa-miR-186-5p	83	3220	0.025129
hsa-miR-320a	1174	14381	0.075474	hsa-miR-486-5p	3747	171018	0.02144
hsa-miR-374a-3p	34	340	0.090909	hsa-miR-92b-3p	1150	22909	0.047799
hsa-miR-30e-5p	52992	1974	0.964087	hsa-miR-29a-3p	403	404	0.49938
hsa-miR-141-3p	247	4631	0.050636	hsa-miR-378f	88	0	1
hsa-miR-1271-5p	11	265	0.039855	hsa-miR-29c-5p	87	86	0.50289
hsa-miR-181a-5p	7654	118671	0.06059	hsa-miR-375	6554	296070	0.021657
hsa-miR-136-3p	20	59	0.253165	hsa-let-7i-5p	338	24974	0.013353
hsa-let-7c	60299	154903	0.280197	hsa-miR-99b-5p	17830	302672	0.055631
hsa-miR-339-5p	44	34	0.564103	hsa-miR-146b-5p	208	14626	0.014022
hsa-miR-186-5p	1639	3791	0.301842	hsa-miR-378a-3p	467	3347	0.122444
hsa-miR-486-5p	1994	52027	0.036912	hsa-miR-140-3p	98	2900	0.032688
hsa-miR-378b	56	1	0.982456	hsa-miR-26b-5p	104	2421	0.041188
hsa-miR-3605-5p	25	141	0.150602	hsa-miR-127-3p	537	10461	0.048827
hsa-miR-1180	9	91	0.09	hsa-miR-23b-3p	197	946	0.172353
hsa-miR-92b-3p	1063	14016	0.070495	hsa-miR-125b-5p	32446	31529	0.507167
hsa-miR-542-3p	9	40	0.183673	hsa-let-7g-5p	109	7715	0.013931
hsa-miR-374b-5p	60	176	0.254237	hsa-miR-93-5p	98	2341	0.04018
hsa-miR-29c-5p	18	48	0.272727	hsa-miR-330-5p	65	0	1
hsa-let-7i-5p	1536	74903	0.020094	hsa-let-7a-5p	499244	223257	0.690994
hsa-miR-30c-1-3p	16	48	0.25	hsa-miR-27b-3p	111	31008	0.003567
hsa-miR-589-5p	70	209	0.250896	hsa-miR-21-5p	1020	44950	0.022188
hsa-miR-576-5p	5	14	0.263158	hsa-miR-941	44	3161	0.013729
hsa-miR-218-5p	18	253	0.066421	hsa-miR-133a	206	1435	0.125533
hsa-miR-320b	128	682	0.158025	hsa-miR-155-5p	100	102	0.49505
hsa-miR-181a-2-3p	97	1177	0.076138	hsa-miR-548d-5p	196	0	1
hsa-miR-127-3p	1242	9149	0.119527	hsa-miR-145-5p	358	19361	0.018155
hsa-miR-23b-3p	1569	2538	0.382031	hsa-miR-92a-3p	6862	88730	0.071784
hsa-miR-1296	23	82	0.219048	hsa-miR-210	72	1	0.986301
hsa-miR-5096	11	0	1	hsa-miR-126-3p	88	282	0.237838
hsa-miR-125b-5p	44909	32568	0.579643	hsa-miR-130b-3p	64	121	0.345946
hsa-miR-93-5p	103	4110	0.024448	hsa-miR-150-5p	103	686	0.130545
hsa-miR-1587	18	0	1	hsa-miR-23a-3p	105	1481	0.066204
hsa-miR-192-5p	19	6214	0.003048	hsa-let-7e-5p	197120	11975	0.942729
hsa-let-7a-5p	911810	572761	0.614191	hsa-miR-143-3p	16688	2051981	0.008067
hsa-miR-151b	45	681	0.061983	hsa-miR-4510	64	0	1
hsa-miR-541-5p	11	16	0.407407	hsa-miR-378c	91	88	0.50838
hsa-miR-29b-3p	26	34	0.433333	hsa-miR-148b-3p	448	120	0.788732
hsa-miR-133a	2648	3629	0.421858	hsa-miR-100-5p	37658	78366	0.324571
hsa-miR-99a-3p	27	295	0.083851	hsa-miR-500a-3p	3265	948	0.774982
hsa-miR-200b-5p	5	99	0.048077	hsa-miR-125a-5p	10184	123012	0.076459
hsa-miR-6511b-3p	40	26	0.606061	hsa-miR-10b-5p	126119	3301683	0.036793
hsa-miR-454-5p	5	5	0.5	hsa-miR-199b-3p	82	2888	0.027609
hsa-miR-200c-3p	48	1461	0.031809	hsa-miR-22-3p	305	15260	0.019595
hsa-miR-96-5p	28	62	0.311111	hsa-miR-182-5p	3957	189468	0.020458
hsa-miR-1294	6	12	0.333333	hsa-miR-4449	32	2340	0.013491
hsa-miR-671-3p	21	453	0.044304	hsa-miR-103a-3p	290	9427	0.029845
hsa-miR-200b-3p	65	1156	0.053235	hsa-miR-378g	88	0	1
hsa-miR-9-5p	168	962	0.148673	hsa-miR-151a-5p	81	4196	0.018939
hsa-miR-92a-3p	7080	49004	0.126239	hsa-miR-664a-3p	61	93	0.396104
hsa-miR-937-3p	7	7	0.5	hsa-miR-345-5p	72	80	0.473684
hsa-miR-23a-3p	616	1164	0.346067	hsa-miR-342-5p	28	132	0.175
hsa-miR-143-3p	101834	7093564	0.014153	hsa-miR-146a-5p	6	785	0.007585
hsa-miR-378c	108	158	0.406015	hsa-miR-151a-3p	75	17091	0.004369
hsa-miR-135b-5p	137	0	1	hsa-miR-30a-3p	1687	2068	0.449268
hsa-miR-195-5p	269	612	0.305335	hsa-miR-1304-3p	174	0	1
hsa-miR-6510-3p	8	24	0.25	hsa-miR-28-3p	181	33214	0.00542
hsa-miR-4286	10	12	0.454545	hsa-miR-769-5p	71	1873	0.036523
hsa-miR-125a-5p	13112	115484	0.101963	hsa-miR-10a-5p	3156235	88348	0.972771
hsa-miR-10b-5p	423974	5939891	0.066622	hsa-miR-19a-3p	2791	880	0.760283
hsa-miR-660-5p	249	409	0.378419	hsa-miR-181d	4005	493	0.890396
hsa-miR-199b-3p	2575	6630	0.279739	hsa-miR-99a-5p	81313	21762	0.788872
hsa-miR-331-3p	5	13	0.277778	hsa-miR-196a-5p	1451	1	0.999311
hsa-miR-410	51	67	0.432203	hsa-miR-191-5p	4125	217316	0.018628
hsa-miR-421	26	314	0.076471
hsa-miR-4800-3p	10	30	0.25
hsa-miR-4454	16	58	0.216216
hsa-miR-378g	235	0	1
hsa-miR-224-3p	10	0	1
hsa-miR-151a-5p	731	7084	0.093538
hsa-miR-374a-5p	29	83	0.258929
hsa-miR-423-3p	239	2439	0.089246
hsa-miR-146a-5p	3374	7947	0.29803
hsa-miR-151a-3p	597	28773	0.020327
hsa-miR-30a-3p	4436	4700	0.485552
hsa-miR-1304-3p	53	14	0.791045
hsa-miR-28-3p	17962	40008	0.30985
hsa-miR-31-5p	101	248	0.289398
hsa-miR-10a-5p	5704379	191580	0.967507
hsa-miR-6130	5	0	1
hsa-miR-452-5p	15	50	0.230769
hsa-miR-181d	7091	681	0.912378
hsa-miR-504	6	128	0.044776
hsa-miR-744-5p	46	418	0.099138
hsa-miR-99a-5p	251776	78394	0.762565
hsa-miR-196a-5p	2140	56	0.974499
hsa-miR-107	289	4250	0.06367
hsa-miR-150-3p	8	24	0.25
hsa-miR-582-3p	21	267	0.072917
hsa-miR-340-5p	735	1392	0.345557
hsa-miR-126-5p	55	3196	0.016918
hsa-miR-148a-3p	43053	102969	0.294839
hsa-miR-20b-5p	86	188	0.313869
hsa-miR-4677-3p	27	67	0.287234
hsa-miR-25-3p	667	26712	0.024362
hsa-miR-106b-3p	69	804	0.079038
hsa-miR-3613-3p	5	11	0.3125
hsa-miR-6502-5p	7	29	0.194444
hsa-miR-1269b	47	0	1
hsa-miR-378d	74	74	0.5
hsa-miR-101-3p	4938	11742	0.296043
hsa-miR-409-3p	61	1364	0.042807
hsa-miR-204-5p	294	5639	0.049553
hsa-miR-455-3p	7	24	0.225806
hsa-miR-423-5p	1981	4599	0.301064
hsa-miR-1248	30	74	0.288462
hsa-miR-152	41	101	0.288732
hsa-miR-425-5p	44	99	0.307692
hsa-miR-181c-5p	159	2903	0.051927
hsa-miR-6717-5p	5	10	0.333333
hsa-miR-212-5p	8	54	0.129032
hsa-miR-125b-2-3p	522	7245	0.067207
hsa-miR-363-3p	111	1633	0.063647
hsa-miR-183-5p	3689	8555	0.30129
hsa-miR-193b-3p	64	128	0.333333
hsa-miR-874	11	170	0.060773
hsa-miR-148a-5p	274	2199	0.110797
hsa-miR-30b-5p	210	289	0.420842
hsa-miR-200a-3p	3905	197	0.951975
hsa-miR-205-5p	1300	14079	0.084531
hsa-miR-211-5p	46	755	0.057428
hsa-miR-98-5p	179	8357	0.02097
hsa-miR-501-3p	2700	3399	0.442696
hsa-miR-574-5p	19	124	0.132867
hsa-miR-29a-3p	1494	1516	0.496346
hsa-miR-378f	149	0	1
hsa-miR-378h	35	0	1
hsa-miR-375	10508	148162	0.066225
hsa-miR-99b-5p	26592	580865	0.043776
hsa-miR-223-5p	5	18	0.217391
hsa-miR-146b-5p	17062	40370	0.297082
hsa-miR-378a-3p	3819	9257	0.292062
hsa-miR-106b-5p	78	67	0.537931
hsa-miR-140-3p	1242	2417	0.339437
hsa-miR-505-3p	15	40	0.272727
hsa-miR-887	5	49	0.092593
hsa-miR-15a-5p	44	146	0.231579
hsa-miR-221-5p	204	617	0.248477
hsa-miR-484	22	202	0.098214
hsa-miR-26b-5p	2470	6167	0.285979
hsa-miR-24-3p	270	2023	0.11775
hsa-miR-1273a	13	0	1
hsa-miR-15b-5p	48	101	0.322148
hsa-let-7g-5p	1338	28065	0.045506
hsa-miR-223-3p	27	45	0.375
hsa-miR-365b-3p	68	154	0.306306
hsa-miR-142-5p	1127	1546	0.421624
hsa-miR-328	26	500	0.04943
hsa-miR-214-3p	98	143	0.406639
hsa-let-7f-2-3p	104	0	1
hsa-miR-139-5p	14	32	0.304348
hsa-miR-6511a-3p	104	40	0.722222
hsa-miR-21-5p	2885	152830	0.018527
hsa-miR-27b-3p	41993	57962	0.420119
hsa-miR-941	196	2034	0.087892
hsa-miR-155-5p	39	1726	0.022096
hsa-miR-889	16	22	0.421053
hsa-miR-532-5p	62	3799	0.016058
hsa-miR-330-3p	26	10	0.722222
hsa-miR-28-5p	54	1114	0.046233
hsa-miR-548h-5p	50	0	1
hsa-let-7d-3p	36	636	0.053571
hsa-miR-4448	37	0	1
hsa-miR-145-5p	8655	100695	0.07915
hsa-miR-3065-3p	5	8	0.384615
hsa-miR-20a-5p	104	193	0.350168
hsa-miR-106a-5p	9	29	0.236842
hsa-miR-130a-3p	1747	5130	0.254035
hsa-miR-150-5p	124	1850	0.062817
hsa-miR-126-3p	391	527	0.425926
hsa-miR-21-3p	291	699	0.293939
hsa-miR-361-3p	64	274	0.189349
hsa-miR-222-3p	310	9293	0.032282
hsa-let-7e-5p	535538	27674	0.950864
hsa-miR-4510	191	0	1
hsa-miR-148b-3p	292	304	0.489933
hsa-miR-100-5p	111553	239485	0.31778
hsa-miR-500a-3p	3942	1229	0.762328
hsa-miR-142-3p	7	32	0.179487
hsa-miR-146b-3p	39	671	0.05493
hsa-miR-22-3p	2437	21546	0.101614
hsa-miR-182-5p	27022	66408	0.289222
hsa-miR-16-5p	2230	2781	0.445021
hsa-let-7e-3p	24	18	0.571429
hsa-miR-411-5p	91	262	0.25779
hsa-miR-103a-3p	2952	19877	0.129309
hsa-miR-664a-3p	86	195	0.30605
hsa-miR-345-5p	14	220	0.059829
hsa-miR-143-5p	376	197	0.656195
hsa-miR-199b-5p	192	378	0.336842
hsa-miR-1247-3p	32	84	0.275862
hsa-miR-301a-3p	91	194	0.319298
hsa-miR-769-5p	90	1520	0.055901
hsa-miR-27b-5p	200	542	0.269542
hsa-miR-365a-3p	68	154	0.306306
hsa-miR-19a-3p	3149	352	0.899457
hsa-miR-27a-3p	569	752	0.430734
hsa-miR-1285-5p	10	0	1
hsa-miR-3912	6	23	0.206897
hsa-miR-191-5p	63777	123016	0.341431

## Sheet: S2
N				T
miRNA	Count with base edit	Count without base edit	Count with base edit/Total	miRNA	Count with base edit	Count without base edit	Count with base edit/Total
hsa-miR-196b-5p	183	1187	0.133577	hsa-miR-361-5p	93	1602	0.054867
hsa-miR-181b-5p	2456	5767	0.298674	hsa-miR-1260b	27	6	0.818182
hsa-miR-361-5p	20	620	0.03125	hsa-miR-502-3p	117	64	0.646409
hsa-miR-199a-3p	4530	7032	0.391801	hsa-miR-30d-5p	64012	65694	0.493516
hsa-miR-574-3p	39	453	0.079268	hsa-miR-30e-3p	2925	1823	0.616049
hsa-miR-134	25	47	0.347222	hsa-miR-3622a-5p	9	11	0.45
hsa-miR-342-3p	1695	3764	0.310496	hsa-miR-149-5p	55	426	0.114345
hsa-miR-185-3p	14	23	0.378378	hsa-miR-34c-5p	15	47	0.241935
hsa-miR-145-3p	1042	3278	0.241204	hsa-miR-34b-5p	7	0	1
hsa-miR-502-3p	207	146	0.586402	hsa-miR-381-3p	144	334	0.301255
hsa-miR-30d-5p	61874	12677	0.829955	hsa-miR-378i	2529	0	1
hsa-miR-190a	6	93	0.060606	hsa-miR-23c	4313	0	1
hsa-miR-125b-1-3p	20	1094	0.017953	hsa-miR-221-3p	694	17580	0.037977
hsa-miR-1307-5p	87	96	0.47541	hsa-miR-6503-3p	14	0	1
hsa-miR-30e-3p	4376	2813	0.608708	hsa-miR-652-3p	14	43	0.245614
hsa-miR-30c-5p	1656	1749	0.486344	hsa-miR-3615	13	187	0.065
hsa-miR-224-5p	25	88	0.221239	hsa-miR-17-5p	212	494	0.300283
hsa-miR-3622a-5p	11	20	0.354839	hsa-miR-1180	15	253	0.05597
hsa-miR-149-5p	48	295	0.139942	hsa-miR-92b-3p	2933	30846	0.086829
hsa-let-7b-5p	115928	21217	0.845295	hsa-miR-542-3p	9	41	0.18
hsa-miR-29c-3p	1013	389	0.722539	hsa-miR-29c-5p	16	123	0.115108
hsa-miR-455-5p	13	122	0.096296	hsa-let-7i-5p	361	23595	0.015069
hsa-miR-19b-3p	632	1696	0.271478	hsa-miR-33a-5p	15	19	0.441176
hsa-miR-1266	10	16	0.384615	hsa-miR-1273g-3p	5	0	1
hsa-miR-381-3p	133	337	0.282979	hsa-miR-3617-3p	5	10	0.333333
hsa-let-7f-5p	630925	183054	0.775112	hsa-miR-561-5p	10	12	0.454545
hsa-miR-378i	2698	0	1	hsa-miR-181c-3p	6	59	0.092308
hsa-miR-23c	3145	0	1	hsa-miR-127-3p	2687	18716	0.125543
hsa-miR-221-3p	1184	36920	0.031073	hsa-miR-654-3p	14	288	0.046358
hsa-miR-203a	21	282	0.069307	hsa-miR-23b-3p	545	5061	0.097217
hsa-miR-4999-5p	23	0	1	hsa-miR-5096	43	17	0.716667
hsa-miR-34a-5p	255	340	0.428571	hsa-miR-125b-5p	63062	67805	0.481879
hsa-miR-199a-5p	506	654	0.436207	hsa-miR-3651	5	567	0.008741
hsa-miR-5680	7	17	0.291667	hsa-miR-133a	2740	3937	0.410364
hsa-miR-335-5p	5	23	0.178571	hsa-miR-33b-3p	9	7	0.5625
hsa-miR-30a-5p	26669	59176	0.310665	hsa-miR-615-5p	7	6	0.538462
hsa-let-7d-5p	918	3731	0.197462	hsa-miR-671-3p	17	1226	0.013677
hsa-miR-26a-5p	54377	61222	0.470393	hsa-miR-9-5p	108	357	0.232258
hsa-miR-652-3p	17	16	0.515152	hsa-miR-210	26	144	0.152941
hsa-miR-17-5p	36	85	0.297521	hsa-miR-449c-5p	17	944	0.01769
hsa-miR-873-5p	5	53	0.086207	hsa-miR-23a-3p	245	2556	0.087469
hsa-miR-320a	1378	7998	0.146971	hsa-miR-143-3p	42471	4360925	0.009645
hsa-miR-374a-3p	25	203	0.109649	hsa-miR-378c	11	350	0.030471
hsa-miR-30e-5p	59968	1480	0.975915	hsa-miR-135b-5p	177	0	1
hsa-miR-141-3p	38	1812	0.020541	hsa-miR-195-5p	499	1069	0.31824
hsa-miR-1271-5p	46	284	0.139394	hsa-miR-125a-5p	10740	156186	0.06434
hsa-miR-181a-5p	3396	95907	0.034198	hsa-miR-10b-5p	125360	2089067	0.056611
hsa-miR-136-3p	34	69	0.330097	hsa-miR-148b-5p	7	52	0.118644
hsa-let-7c	40562	121427	0.2504	hsa-miR-4454	10	639	0.015408
hsa-miR-339-5p	40	72	0.357143	hsa-miR-193a-5p	5	40	0.111111
hsa-miR-186-5p	237	5570	0.040813	hsa-miR-423-3p	512	5651	0.083076
hsa-miR-486-5p	1529	92993	0.016176	hsa-miR-146a-5p	45	3685	0.012064
hsa-miR-378b	65	0	1	hsa-miR-3960	10	0	1
hsa-miR-3605-5p	26	23	0.530612	hsa-miR-28-3p	18447	41080	0.309893
hsa-miR-1180	34	122	0.217949	hsa-miR-31-5p	6	167	0.034682
hsa-miR-92b-3p	1190	10069	0.105693	hsa-miR-10a-5p	1995962	109732	0.947888
hsa-miR-1245b-3p	9	5	0.642857	hsa-miR-452-5p	9	35	0.204545
hsa-miR-548ay-5p	20	0	1	hsa-miR-181d	5334	993	0.843054
hsa-miR-542-3p	18	47	0.276923	hsa-let-7a-3p	78	181	0.301158
hsa-let-7i-5p	669	44768	0.014724	hsa-miR-504	15	165	0.083333
hsa-miR-589-5p	8	172	0.044444	hsa-miR-744-5p	23	2074	0.010968
hsa-miR-218-5p	16	95	0.144144	hsa-miR-99a-5p	145456	98520	0.59619
hsa-miR-212-3p	5	38	0.116279	hsa-miR-532-3p	19	27	0.413043
hsa-miR-4699-3p	6	18	0.25	hsa-miR-196a-5p	4852	30	0.993855
hsa-miR-561-5p	10	18	0.357143	hsa-miR-3607-3p	13	1736	0.007433
hsa-miR-181c-3p	5	126	0.038168	hsa-miR-126-5p	65	7130	0.009034
hsa-miR-320b	98	419	0.189555	hsa-miR-3605-3p	7	147	0.045455
hsa-miR-23b-5p	12	28	0.3	hsa-miR-4677-3p	8	42	0.16
hsa-miR-181a-2-3p	10	852	0.011601	hsa-miR-1247-5p	13	384	0.032746
hsa-miR-127-3p	1737	9988	0.148145	hsa-miR-101-3p	2547	5619	0.311903
hsa-miR-654-3p	5	193	0.025253	hsa-miR-139-3p	18	5	0.782609
hsa-miR-23b-3p	701	3954	0.150591	hsa-miR-424-5p	16	23	0.410256
hsa-miR-1296	20	143	0.122699	hsa-miR-1273g-5p	12	0	1
hsa-miR-125b-5p	29413	28287	0.509757	hsa-miR-1248	148	329	0.310273
hsa-miR-192-5p	191	8898	0.021014	hsa-miR-422a	20	0	1
hsa-let-7a-5p	655660	323305	0.669748	hsa-miR-152	51	129	0.283333
hsa-miR-151b	61	525	0.104096	hsa-miR-376c-3p	12	0	1
hsa-miR-29b-3p	16	31	0.340426	hsa-miR-363-3p	252	3427	0.068497
hsa-miR-133a	3016	4340	0.410005	hsa-miR-193b-3p	291	533	0.353155
hsa-miR-99a-3p	59	282	0.173021	hsa-miR-148a-5p	487	3865	0.111903
hsa-miR-548d-5p	40	0	1	hsa-miR-30b-5p	1134	2322	0.328125
hsa-miR-6511b-3p	15	74	0.168539	hsa-miR-205-5p	1592	12784	0.11074
hsa-miR-200c-3p	6	824	0.007229	hsa-miR-320c	32	10	0.761905
hsa-miR-96-5p	24	74	0.244898	hsa-miR-378h	65	0	1
hsa-miR-200b-3p	41	1014	0.038863	hsa-miR-375	15576	552188	0.027434
hsa-miR-9-5p	84	349	0.193995	hsa-miR-99b-5p	12189	324177	0.036237
hsa-miR-92a-3p	5483	34048	0.138701	hsa-miR-146b-5p	499	28215	0.017378
hsa-miR-210	15	124	0.107914	hsa-miR-378a-3p	677	15018	0.043135
hsa-miR-1270	10	17	0.37037	hsa-miR-133b	9	41	0.18
hsa-miR-130b-3p	11	75	0.127907	hsa-miR-221-5p	166	440	0.273927
hsa-miR-598	5	128	0.037594	hsa-miR-5009-5p	9	6	0.6
hsa-miR-23a-3p	149	1396	0.09644	hsa-miR-24-3p	350	2535	0.121317
hsa-miR-143-3p	107385	10534795	0.010091	hsa-miR-15b-5p	58	176	0.247863
hsa-miR-378c	28	410	0.063927	hsa-miR-142-5p	799	1640	0.327593
hsa-miR-195-5p	229	568	0.287327	hsa-miR-328	65	903	0.067149
hsa-miR-125a-5p	7608	78416	0.08844	hsa-let-7f-2-3p	162	39	0.80597
hsa-miR-10b-5p	339394	5903231	0.054367	hsa-miR-6511a-3p	24	0	1
hsa-miR-660-5p	122	265	0.315245	hsa-miR-486-3p	7	73	0.0875
hsa-miR-199b-3p	2265	7032	0.243627	hsa-miR-941	400	5818	0.064329
hsa-miR-410	57	156	0.267606	hsa-miR-330-3p	11	0	1
hsa-miR-421	36	280	0.113924	hsa-miR-28-5p	56	2236	0.024433
hsa-miR-378g	415	0	1	hsa-miR-4448	29	0	1
hsa-miR-151a-5p	967	6731	0.125617	hsa-miR-340-3p	7	22	0.241379
hsa-miR-423-3p	217	2328	0.085265	hsa-miR-126-3p	147	339	0.302469
hsa-miR-379-3p	13	0	1	hsa-miR-150-5p	78	867	0.08254
hsa-miR-146a-5p	31	2814	0.010896	hsa-miR-361-3p	165	599	0.215969
hsa-miR-151a-3p	918	29581	0.030099	hsa-let-7e-5p	296729	16490	0.947353
hsa-miR-30a-3p	2578	5070	0.337082	hsa-miR-4510	85	0	1
hsa-miR-1304-3p	35	10	0.777778	hsa-miR-146b-3p	15	298	0.047923
hsa-miR-28-3p	19925	45581	0.304171	hsa-miR-182-5p	64688	93279	0.409503
hsa-miR-10a-5p	5634935	301088	0.949278	hsa-miR-103a-3p	4563	13651	0.250522
hsa-miR-452-5p	8	47	0.145455	hsa-miR-659-5p	7	45	0.134615
hsa-miR-181d	5675	1207	0.824615	hsa-miR-345-5p	25	623	0.03858
hsa-miR-504	17	60	0.220779	hsa-miR-342-5p	6	109	0.052174
hsa-miR-99a-5p	183332	82973	0.688429	hsa-miR-199b-5p	384	944	0.289157
hsa-miR-532-3p	28	64	0.304348	hsa-miR-769-5p	83	2624	0.030661
hsa-miR-196a-5p	1593	157	0.910286	hsa-miR-27b-5p	144	375	0.277457
hsa-miR-107	349	2208	0.136488	hsa-miR-19a-3p	4791	725	0.868564
hsa-miR-582-3p	36	189	0.16	hsa-miR-32-5p	5	28	0.151515
hsa-miR-3607-3p	19	692	0.026723	hsa-miR-1273f	11	0	1
hsa-miR-340-5p	157	1632	0.087759	hsa-miR-181b-5p	2149	5442	0.283098
hsa-miR-126-5p	77	3020	0.024863	hsa-miR-196b-5p	154	3333	0.044164
hsa-miR-148a-3p	26768	61210	0.304258	hsa-miR-3938	6	8	0.428571
hsa-miR-20b-5p	54	130	0.293478	hsa-miR-199a-3p	6162	9382	0.396423
hsa-miR-4677-3p	11	37	0.229167	hsa-miR-134	31	86	0.264957
hsa-miR-34a-3p	7	13	0.35	hsa-miR-574-3p	87	608	0.12518
hsa-miR-1260a	41	0	1	hsa-miR-6716-3p	8	25	0.242424
hsa-miR-25-3p	956	16621	0.054389	hsa-miR-145-3p	2405	6829	0.260451
hsa-miR-106b-3p	59	493	0.106884	hsa-miR-342-3p	1876	4254	0.306036
hsa-miR-1247-5p	21	119	0.15	hsa-miR-125b-1-3p	7	1005	0.006917
hsa-miR-490-3p	20	35	0.363636	hsa-miR-190a	6	63	0.086957
hsa-miR-101-3p	1949	4638	0.295886	hsa-miR-30d-3p	17	459	0.035714
hsa-miR-409-3p	28	1459	0.01883	hsa-miR-409-5p	11	85	0.114583
hsa-miR-204-5p	214	9031	0.023148	hsa-miR-1307-5p	81	22	0.786408
hsa-miR-424-5p	12	33	0.266667	hsa-miR-224-5p	12	219	0.051948
hsa-miR-1	12	11	0.521739	hsa-miR-30c-5p	2716	2882	0.485173
hsa-miR-194-5p	16	108	0.129032	hsa-miR-708-5p	11	13	0.458333
hsa-miR-455-3p	6	45	0.117647	hsa-let-7b-5p	151510	35354	0.810804
hsa-miR-423-5p	1759	4218	0.294295	hsa-miR-29c-3p	2519	1327	0.654966
hsa-miR-1248	8	35	0.186047	hsa-miR-19b-3p	2258	4983	0.311835
hsa-miR-422a	17	0	1	hsa-miR-455-5p	25	130	0.16129
hsa-miR-152	73	183	0.285156	hsa-let-7f-5p	640901	149075	0.811292
hsa-miR-425-5p	19	46	0.292308	hsa-miR-548y	15	0	1
hsa-miR-181c-5p	140	2468	0.053681	hsa-miR-203a	33	581	0.053746
hsa-miR-125b-2-3p	138	8773	0.015486	hsa-miR-664a-5p	5	12	0.294118
hsa-miR-363-3p	85	1040	0.075556	hsa-miR-199a-5p	974	1074	0.475586
hsa-miR-183-5p	1588	4801	0.248552	hsa-miR-34a-5p	210	470	0.308824
hsa-miR-193b-3p	87	202	0.301038	hsa-miR-335-5p	11	25	0.305556
hsa-miR-874	51	195	0.207317	hsa-let-7d-5p	1073	5031	0.175786
hsa-miR-148a-5p	143	1189	0.107357	hsa-miR-30a-5p	78926	45853	0.632526
hsa-miR-30b-5p	240	482	0.33241	hsa-miR-26a-5p	103191	117112	0.468405
hsa-miR-200a-3p	1536	45	0.971537	hsa-miR-5091	10	22	0.3125
hsa-miR-205-5p	1051	9532	0.09931	hsa-miR-320a	1764	10271	0.146572
hsa-miR-98-5p	106	5345	0.019446	hsa-miR-30e-5p	47693	4088	0.921052
hsa-miR-501-3p	1262	2970	0.298204	hsa-miR-374a-3p	37	239	0.134058
hsa-miR-29a-3p	885	1082	0.449924	hsa-miR-1271-5p	66	320	0.170984
hsa-miR-378f	359	0	1	hsa-miR-141-3p	1010	24376	0.039786
hsa-miR-378h	65	0	1	hsa-let-7c	70633	156514	0.310957
hsa-miR-375	2777	94893	0.028432	hsa-miR-136-3p	38	100	0.275362
hsa-miR-99b-5p	18875	517303	0.035203	hsa-miR-181a-5p	3292	78969	0.040019
hsa-miR-146b-5p	340	18469	0.018076	hsa-miR-186-5p	672	17604	0.03677
hsa-miR-378a-3p	1099	21208	0.049267	hsa-miR-339-5p	25	56	0.308642
hsa-miR-106b-5p	94	68	0.580247	hsa-miR-550a-5p	22	18	0.55
hsa-miR-140-3p	585	1689	0.257256	hsa-miR-3605-5p	5	85	0.055556
hsa-miR-887	23	42	0.353846	hsa-miR-378b	93	0	1
hsa-miR-133b	18	82	0.18	hsa-miR-486-5p	893	41418	0.021106
hsa-miR-379-5p	7	55	0.112903	hsa-miR-339-3p	12	134	0.082192
hsa-miR-15a-5p	10	22	0.3125	hsa-miR-548c-3p	10	0	1
hsa-miR-221-5p	349	1214	0.223289	hsa-miR-576-5p	9	46	0.163636
hsa-miR-484	38	179	0.175115	hsa-miR-218-5p	112	335	0.250559
hsa-miR-382-3p	8	16	0.333333	hsa-miR-30b-3p	7	14	0.333333
hsa-miR-26b-5p	1725	4235	0.28943	hsa-miR-135a-5p	72	232	0.236842
hsa-miR-24-3p	330	2205	0.130178	hsa-miR-320b	148	622	0.192208
hsa-miR-132-3p	30	57	0.344828	hsa-miR-582-5p	5	14	0.263158
hsa-miR-15b-5p	19	54	0.260274	hsa-miR-1296	19	277	0.064189
hsa-let-7g-5p	557	18109	0.02984	hsa-miR-93-5p	212	9991	0.020778
hsa-miR-223-3p	11	33	0.25	hsa-miR-4787-5p	5	0	1
hsa-miR-365b-3p	55	88	0.384615	hsa-let-7a-5p	588978	337361	0.635813
hsa-miR-142-5p	327	733	0.308491	hsa-miR-192-5p	66	6980	0.009367
hsa-miR-328	80	1212	0.06192	hsa-miR-7-5p	19	106	0.152
hsa-miR-214-3p	51	196	0.206478	hsa-miR-151b	238	1677	0.124282
hsa-let-7f-2-3p	60	0	1	hsa-miR-10b-3p	6	32	0.157895
hsa-miR-6511a-3p	296	15	0.951768	hsa-miR-29b-3p	66	120	0.354839
hsa-miR-21-5p	902	67100	0.013264	hsa-miR-654-5p	6	27	0.181818
hsa-miR-27b-3p	35430	78468	0.311068	hsa-miR-99a-3p	78	544	0.125402
hsa-miR-941	308	1619	0.159834	hsa-miR-200c-3p	115	5152	0.021834
hsa-miR-889	26	49	0.346667	hsa-miR-96-5p	221	398	0.357027
hsa-miR-532-5p	81	2746	0.028652	hsa-miR-200b-3p	79	622	0.112696
hsa-miR-330-3p	6	44	0.12	hsa-miR-92a-3p	23724	158937	0.12988
hsa-miR-28-5p	6	1269	0.004706	hsa-miR-106a-3p	5	8	0.384615
hsa-let-7d-3p	16	894	0.017582	hsa-miR-130b-3p	45	275	0.140625
hsa-miR-145-5p	9863	75044	0.116162	hsa-miR-548z	10	0	1
hsa-miR-340-3p	5	6	0.454545	hsa-miR-891a	7	50	0.122807
hsa-miR-20a-5p	106	174	0.378571	hsa-miR-374c-5p	8	0	1
hsa-miR-130a-3p	1454	3249	0.309164	hsa-miR-17-3p	6	64	0.085714
hsa-miR-150-5p	164	2383	0.064389	hsa-miR-660-5p	222	458	0.326471
hsa-miR-126-3p	221	353	0.385017	hsa-miR-199b-3p	3081	9382	0.247212
hsa-miR-21-3p	261	528	0.330798	hsa-miR-331-3p	10	26	0.277778
hsa-miR-361-3p	43	128	0.251462	hsa-miR-410	64	150	0.299065
hsa-miR-222-3p	1006	27860	0.034851	hsa-miR-4449	86	1059	0.075109
hsa-let-7e-5p	298654	21904	0.931669	hsa-miR-421	88	536	0.141026
hsa-miR-4510	65	0	1	hsa-miR-151a-5p	3016	20034	0.130846
hsa-miR-148b-3p	106	189	0.359322	hsa-miR-378g	351	0	1
hsa-miR-100-5p	108306	175599	0.381487	hsa-miR-641	7	4	0.636364
hsa-miR-500a-3p	3291	865	0.791867	hsa-miR-1285-3p	22	30	0.423077
hsa-miR-146b-3p	21	318	0.061947	hsa-miR-144-5p	5	23	0.178571
hsa-miR-22-3p	4246	30455	0.12236	hsa-miR-151a-3p	1959	50376	0.037432
hsa-miR-182-5p	20372	30085	0.40375	hsa-miR-1304-3p	73	11	0.869048
hsa-miR-16-5p	2048	2285	0.472652	hsa-miR-30a-3p	1715	3630	0.320861
hsa-miR-411-5p	87	210	0.292929	hsa-miR-4770	7	34	0.170732
hsa-miR-103a-3p	3026	8959	0.252482	hsa-miR-153	30	32	0.483871
hsa-miR-659-5p	7	28	0.2	hsa-miR-26b-3p	46	274	0.14375
hsa-miR-345-5p	6	463	0.012793	hsa-miR-107	343	2340	0.127842
hsa-miR-143-5p	213	326	0.395176	hsa-miR-340-5p	89	1024	0.079964
hsa-miR-199b-5p	132	280	0.320388	hsa-miR-148a-3p	118025	269965	0.304196
hsa-miR-1247-3p	6	80	0.069767	hsa-miR-20b-5p	89	235	0.274691
hsa-miR-301a-3p	24	53	0.311688	hsa-miR-1260a	19	0	1
hsa-miR-769-5p	5	1040	0.004785	hsa-miR-25-3p	2629	43530	0.056955
hsa-miR-27b-5p	110	390	0.22	hsa-miR-106b-3p	178	1589	0.100736
hsa-miR-365a-3p	55	88	0.384615	hsa-miR-1307-3p	16	598	0.026059
hsa-miR-19a-3p	1671	214	0.886472	hsa-miR-548h-3p	10	0	1
hsa-miR-27a-3p	437	822	0.347101	hsa-miR-204-5p	116	3212	0.034856
hsa-miR-190b	6	28	0.176471	hsa-miR-409-3p	43	1464	0.028534
hsa-miR-744-3p	8	9	0.470588	hsa-miR-1	36	38	0.486486
hsa-miR-191-5p	54087	110646	0.328331	hsa-miR-3940-3p	8	83	0.087912
				hsa-miR-423-5p	5548	12601	0.305692
				hsa-miR-425-5p	300	608	0.330396
				hsa-miR-181c-5p	103	2349	0.042007
				hsa-miR-212-5p	23	91	0.201754
				hsa-miR-125b-2-3p	197	12845	0.015105
				hsa-miR-183-5p	5125	14528	0.260774
				hsa-miR-874	82	267	0.234957
				hsa-miR-338-3p	33	121	0.214286
				hsa-miR-200a-3p	21454	177	0.991817
				hsa-miR-98-5p	81	3476	0.022772
				hsa-miR-501-3p	1777	2189	0.448058
				hsa-miR-574-5p	9	238	0.036437
				hsa-miR-29a-3p	2334	2626	0.470565
				hsa-miR-378f	299	1	0.996667
				hsa-miR-140-3p	672	2111	0.241466
				hsa-miR-106b-5p	79	113	0.411458
				hsa-miR-887	57	87	0.395833
				hsa-miR-15a-5p	135	286	0.320665
				hsa-miR-379-5p	6	3	0.666667
				hsa-miR-484	28	533	0.049911
				hsa-miR-26b-5p	5511	13442	0.290772
				hsa-miR-132-3p	12	406	0.028708
				hsa-let-7g-5p	729	24644	0.028731
				hsa-miR-365b-3p	253	409	0.382175
				hsa-miR-214-3p	83	339	0.196682
				hsa-miR-6724-5p	62	31	0.666667
				hsa-miR-21-5p	1685	123641	0.013445
				hsa-miR-27b-3p	41545	90140	0.315488
				hsa-miR-197-3p	16	232	0.064516
				hsa-miR-155-5p	5	1087	0.004579
				hsa-miR-532-5p	45	2218	0.019885
				hsa-let-7d-3p	116	1462	0.073511
				hsa-miR-145-5p	4821	35122	0.120697
				hsa-miR-20a-5p	221	570	0.279393
				hsa-miR-106a-5p	51	153	0.25
				hsa-miR-130a-3p	1200	2502	0.324149
				hsa-miR-21-3p	573	1336	0.300157
				hsa-miR-222-3p	884	21174	0.040076
				hsa-miR-148b-3p	615	608	0.502862
				hsa-miR-100-5p	109171	134723	0.447617
				hsa-miR-500a-3p	2787	1506	0.649196
				hsa-miR-22-3p	8468	65175	0.114987
				hsa-miR-16-5p	5262	6001	0.467193
				hsa-miR-411-5p	108	389	0.217304
				hsa-miR-664a-3p	15	434	0.033408
				hsa-miR-143-5p	271	455	0.373278
				hsa-miR-215	8	25	0.242424
				hsa-miR-1247-3p	5	69	0.067568
				hsa-miR-301a-3p	42	95	0.306569
				hsa-miR-365a-3p	253	409	0.382175
				hsa-miR-27a-3p	702	1433	0.328806
				hsa-miR-1291	7	40	0.148936
				hsa-miR-190b	5	55	0.083333
				hsa-miR-1285-5p	27	0	1
				hsa-miR-141-5p	22	254	0.07971
				hsa-miR-191-5p	211364	431598	0.328735

## Sheet: S3
N				T
miRNA	Count with base edit	Count without base edit	Count with base edit/Total	miRNA	Count with base edit	Count without base edit	Count with base edit/Total
hsa-miR-361-5p	59	1519	0.037389	hsa-miR-196b-5p	190	1387	0.120482
hsa-miR-1260b	7	0	1	hsa-miR-181b-5p	1795	5273	0.253962
hsa-miR-502-3p	215	116	0.649547	hsa-miR-361-5p	67	514	0.115318
hsa-miR-30d-5p	57745	26926	0.681993	hsa-miR-199a-3p	2007	10602	0.159172
hsa-miR-30e-3p	2057	2311	0.470925	hsa-miR-574-3p	80	1147	0.0652
hsa-miR-3622a-5p	33	16	0.673469	hsa-miR-134	45	215	0.173077
hsa-miR-149-5p	50	560	0.081967	hsa-miR-1260b	48	0	1
hsa-miR-34c-5p	16	80	0.166667	hsa-miR-6716-3p	14	95	0.12844
hsa-miR-34b-5p	6	7	0.461538	hsa-miR-342-3p	233	13570	0.01688
hsa-miR-381-3p	132	302	0.304147	hsa-miR-145-3p	30	5689	0.005246
hsa-miR-378i	3370	0	1	hsa-miR-502-3p	346	114	0.752174
hsa-miR-23c	9286	0	1	hsa-miR-30d-5p	35614	22726	0.610456
hsa-miR-221-3p	362	10749	0.03258	hsa-miR-409-5p	9	71	0.1125
hsa-miR-185-5p	5	23	0.178571	hsa-miR-30d-3p	6	28	0.176471
hsa-miR-652-3p	34	61	0.357895	hsa-miR-125b-1-3p	8	1404	0.005666
hsa-miR-3615	7	115	0.057377	hsa-miR-1307-5p	33	1	0.970588
hsa-miR-17-5p	56	69	0.448	hsa-miR-30c-2-3p	65	790	0.076023
hsa-miR-92b-3p	5280	51709	0.092649	hsa-miR-30e-3p	3703	2744	0.574376
hsa-miR-374b-5p	8	668	0.011834	hsa-miR-30c-5p	432	1769	0.196274
hsa-miR-29c-5p	13	80	0.139785	hsa-miR-149-5p	62	226	0.215278
hsa-miR-1468	19	624	0.029549	hsa-let-7b-5p	116908	28925	0.801657
hsa-let-7i-5p	523	36115	0.014275	hsa-miR-29c-3p	1353	474	0.740558
hsa-miR-33a-5p	15	0	1	hsa-miR-19b-3p	412	658	0.385047
hsa-miR-548w	14	0	1	hsa-miR-381-3p	119	447	0.210247
hsa-miR-181c-3p	13	200	0.061033	hsa-let-7f-5p	427536	155204	0.733665
hsa-miR-127-3p	2813	19179	0.12791	hsa-miR-378i	1557	0	1
hsa-miR-23b-3p	1510	10685	0.123821	hsa-miR-23c	4552	1	0.99978
hsa-miR-5096	28	3	0.903226	hsa-miR-221-3p	181	5003	0.034915
hsa-miR-125b-5p	88251	77023	0.533968	hsa-miR-203a	7	170	0.039548
hsa-miR-429	8	681	0.011611	hsa-miR-181a-3p	7	508	0.013592
hsa-miR-27a-5p	7	61	0.102941	hsa-miR-195-3p	60	481	0.110906
hsa-miR-133a	3732	4705	0.442337	hsa-miR-34a-5p	71	371	0.160633
hsa-miR-200b-5p	44	295	0.129794	hsa-miR-199a-5p	248	2472	0.091176
hsa-miR-548d-5p	42	4	0.913043	hsa-miR-30a-5p	30117	31348	0.489986
hsa-miR-671-3p	12	704	0.01676	hsa-let-7d-5p	690	3189	0.177881
hsa-miR-1301	10	30	0.25	hsa-miR-26a-5p	9582	109626	0.080381
hsa-miR-9-5p	99	233	0.298193	hsa-miR-6514-5p	5	28	0.151515
hsa-miR-210	59	205	0.223485	hsa-miR-320a	229	10103	0.022164
hsa-miR-23a-3p	396	3877	0.092675	hsa-miR-30e-5p	32927	1893	0.945635
hsa-miR-143-3p	98918	11243378	0.008721	hsa-miR-141-3p	338	4051	0.077011
hsa-miR-378c	46	335	0.120735	hsa-miR-1271-5p	18	390	0.044118
hsa-miR-135b-5p	30	8	0.789474	hsa-miR-181a-5p	2718	81016	0.03246
hsa-miR-195-5p	622	1316	0.320949	hsa-let-7c	38672	121344	0.241676
hsa-miR-125a-5p	22798	265768	0.079004	hsa-miR-186-5p	1188	5794	0.170152
hsa-miR-10b-5p	489788	2672828	0.154868	hsa-miR-486-5p	6920	240276	0.027994
hsa-miR-148b-5p	8	71	0.101266	hsa-miR-378b	125	0	1
hsa-miR-4454	15	121	0.110294	hsa-miR-3605-5p	39	145	0.211957
hsa-miR-224-3p	5	14	0.263158	hsa-miR-1180	34	91	0.272
hsa-miR-374a-5p	20	176	0.102041	hsa-miR-92b-3p	2219	42898	0.049183
hsa-miR-193a-5p	7	70	0.090909	hsa-miR-374b-5p	49	354	0.121588
hsa-miR-423-3p	498	4729	0.095275	hsa-miR-29c-5p	32	27	0.542373
hsa-miR-146a-5p	282	13055	0.021144	hsa-miR-1468	33	860	0.036954
hsa-miR-28-3p	28570	64207	0.307943	hsa-let-7i-5p	586	42967	0.013455
hsa-miR-31-5p	46	606	0.070552	hsa-miR-30c-1-3p	8	102	0.072727
hsa-miR-10a-5p	2553896	494994	0.837648	hsa-miR-589-5p	29	262	0.099656
hsa-miR-452-5p	19	55	0.256757	hsa-miR-181a-2-3p	42	1381	0.029515
hsa-miR-181d	6068	1632	0.788052	hsa-miR-127-3p	1192	25346	0.044917
hsa-miR-504	9	158	0.053892	hsa-miR-23b-3p	1035	5254	0.164573
hsa-miR-744-5p	5	1082	0.0046	hsa-miR-125b-5p	55426	83511	0.398929
hsa-miR-99a-5p	360385	128248	0.737537	hsa-miR-93-5p	32	2501	0.012633
hsa-miR-532-3p	11	27	0.289474	hsa-miR-192-5p	115	8702	0.013043
hsa-miR-196a-5p	2612	289	0.900379	hsa-let-7a-5p	534968	219135	0.70941
hsa-miR-548j	6	0	1	hsa-miR-151b	37	1242	0.028929
hsa-miR-126-5p	159	8600	0.018153	hsa-miR-29b-3p	14	99	0.123894
hsa-miR-4677-3p	9	32	0.219512	hsa-miR-654-5p	26	32	0.448276
hsa-miR-1247-5p	48	818	0.055427	hsa-miR-133a	672	1622	0.292938
hsa-miR-490-3p	6	13	0.315789	hsa-miR-99a-3p	20	188	0.096154
hsa-miR-101-3p	1531	3498	0.304434	hsa-miR-200b-5p	17	469	0.034979
hsa-miR-194-5p	507	4015	0.112119	hsa-miR-6511b-3p	55	0	1
hsa-miR-1248	6	22	0.214286	hsa-miR-454-5p	11	117	0.085938
hsa-miR-422a	17	0	1	hsa-miR-200c-3p	8	1187	0.006695
hsa-miR-152	99	220	0.310345	hsa-miR-671-3p	5	1376	0.003621
hsa-miR-363-3p	312	2971	0.095035	hsa-miR-200b-3p	251	2793	0.082457
hsa-miR-193b-3p	124	315	0.28246	hsa-miR-9-5p	165	846	0.163205
hsa-miR-148a-5p	149	1059	0.123344	hsa-miR-92a-3p	5902	70774	0.076973
hsa-miR-30b-5p	488	948	0.339833	hsa-miR-210	30	272	0.099338
hsa-miR-9-3p	15	15	0.5	hsa-miR-23a-3p	484	3021	0.138088
hsa-miR-205-5p	2321	21677	0.096716	hsa-miR-143-3p	153384	6641190	0.022574
hsa-miR-548x-5p	14	0	1	hsa-miR-378c	116	373	0.237219
hsa-miR-378h	21	0	1	hsa-miR-125a-5p	12971	175225	0.068923
hsa-miR-375	3396	107484	0.030628	hsa-miR-10b-5p	652250	4749709	0.120743
hsa-miR-99b-5p	20545	488742	0.040341	hsa-miR-660-5p	21	281	0.069536
hsa-miR-146b-5p	1389	66476	0.020467	hsa-miR-199b-3p	1000	10568	0.086445
hsa-miR-378a-3p	766	16267	0.044972	hsa-miR-4449	16	592	0.026316
hsa-miR-133b	26	43	0.376812	hsa-miR-410	38	372	0.092683
hsa-miR-221-5p	218	564	0.278772	hsa-miR-421	38	202	0.158333
hsa-miR-24-3p	758	5874	0.114294	hsa-miR-378g	405	0	1
hsa-miR-15b-5p	83	138	0.375566	hsa-miR-151a-5p	439	12525	0.033863
hsa-miR-223-3p	46	97	0.321678	hsa-miR-374a-5p	12	146	0.075949
hsa-miR-142-5p	2889	6288	0.314809	hsa-miR-423-3p	198	4116	0.045897
hsa-miR-328	61	939	0.061	hsa-miR-146a-5p	261	2257	0.103654
hsa-let-7f-2-3p	78	0	1	hsa-miR-151a-3p	951	49536	0.018837
hsa-miR-6511a-3p	96	21	0.820513	hsa-miR-30a-3p	3087	3686	0.45578
hsa-miR-486-3p	11	83	0.117021	hsa-miR-1304-3p	42	0	1
hsa-miR-941	324	3132	0.09375	hsa-miR-28-3p	1204	113559	0.010491
hsa-miR-889	24	59	0.289157	hsa-miR-4792	13	0	1
hsa-miR-330-3p	16	12	0.571429	hsa-miR-31-5p	49	138	0.262032
hsa-miR-28-5p	87	3105	0.027256	hsa-miR-10a-5p	4505667	553390	0.890614
hsa-miR-625-3p	5	80	0.058824	hsa-miR-181d	5107	876	0.853585
hsa-miR-340-3p	5	12	0.294118	hsa-miR-744-5p	49	1173	0.040098
hsa-miR-451a	17	647	0.025602	hsa-miR-99a-5p	274031	144808	0.654263
hsa-miR-126-3p	255	763	0.250491	hsa-miR-196a-5p	2096	45	0.978982
hsa-miR-150-5p	195	2367	0.076112	hsa-miR-107	43	3656	0.011625
hsa-miR-361-3p	90	406	0.181452	hsa-miR-150-3p	14	115	0.108527
hsa-let-7e-5p	174168	20140	0.89635	hsa-miR-4804-5p	28	0	1
hsa-miR-200a-5p	11	97	0.101852	hsa-miR-340-5p	191	1520	0.111631
hsa-miR-4510	78	0	1	hsa-miR-126-5p	6	2715	0.002205
hsa-miR-146b-3p	49	563	0.080065	hsa-miR-148a-3p	2931	189505	0.015231
hsa-miR-182-5p	24925	38400	0.393604	hsa-miR-1260a	28	0	1
hsa-miR-103a-3p	2340	6943	0.252074	hsa-miR-25-3p	745	38071	0.019193
hsa-miR-548ak	6	0	1	hsa-miR-106b-3p	6	1538	0.003886
hsa-let-7i-3p	5	16	0.238095	hsa-miR-1247-5p	127	830	0.132706
hsa-miR-345-5p	11	686	0.015782	hsa-miR-548o-5p	47	0	1
hsa-miR-342-5p	7	127	0.052239	hsa-miR-378d	16	125	0.113475
hsa-miR-199b-5p	332	756	0.305147	hsa-miR-101-3p	168	6551	0.025004
hsa-miR-769-5p	40	1429	0.027229	hsa-miR-409-3p	17	3213	0.005263
hsa-miR-27b-5p	287	750	0.27676	hsa-miR-204-5p	620	16383	0.036464
hsa-miR-19a-3p	728	93	0.886724	hsa-miR-423-5p	205	14464	0.013975
hsa-miR-181b-5p	3362	6185	0.352153	hsa-miR-422a	32	0	1
hsa-miR-196b-5p	398	1925	0.17133	hsa-miR-152	35	145	0.194444
hsa-miR-199a-3p	8479	12477	0.40461	hsa-miR-425-5p	12	330	0.035088
hsa-miR-128	5	488	0.010142	hsa-miR-181c-5p	142	3300	0.041255
hsa-miR-134	33	66	0.333333	hsa-miR-212-5p	19	153	0.110465
hsa-miR-574-3p	81	536	0.13128	hsa-miR-125b-2-3p	282	12601	0.021889
hsa-miR-6716-3p	7	15	0.318182	hsa-miR-183-5p	1534	20665	0.069102
hsa-miR-145-3p	4365	12495	0.258897	hsa-miR-548am-5p	47	0	1
hsa-miR-342-3p	2669	5809	0.314815	hsa-miR-148a-5p	91	4737	0.018848
hsa-miR-125b-1-3p	36	1907	0.018528	hsa-miR-200a-3p	3334	466	0.877368
hsa-miR-409-5p	20	112	0.151515	hsa-miR-30b-5p	114	1050	0.097938
hsa-miR-1307-5p	90	26	0.775862	hsa-miR-205-5p	42	1764	0.023256
hsa-miR-224-5p	27	487	0.052529	hsa-miR-98-5p	81	3030	0.026037
hsa-miR-30c-5p	2480	2613	0.486943	hsa-miR-501-3p	3247	4932	0.396992
hsa-miR-708-5p	25	69	0.265957	hsa-miR-29a-3p	638	1818	0.259772
hsa-let-7b-5p	96625	35036	0.733892	hsa-miR-378f	380	0	1
hsa-miR-29c-3p	2026	493	0.804287	hsa-miR-378h	32	0	1
hsa-miR-19b-3p	376	807	0.317836	hsa-miR-375	16837	616269	0.026594
hsa-miR-455-5p	20	145	0.121212	hsa-miR-99b-5p	36152	603793	0.056492
hsa-let-7f-5p	362067	203954	0.639671	hsa-miR-223-5p	12	13	0.48
hsa-miR-181a-3p	7	269	0.025362	hsa-miR-585	40	0	1
hsa-miR-203a	72	1141	0.059357	hsa-miR-146b-5p	5263	42397	0.110428
hsa-miR-664a-5p	17	42	0.288136	hsa-miR-548au-5p	26	0	1
hsa-miR-199a-5p	1776	1865	0.487778	hsa-miR-378a-3p	1735	10345	0.143626
hsa-miR-34a-5p	156	267	0.368794	hsa-miR-106b-5p	122	0	1
hsa-miR-144-3p	5	19	0.208333	hsa-miR-140-3p	406	3734	0.098068
hsa-let-7d-5p	587	4330	0.119382	hsa-miR-4799-5p	47	0	1
hsa-miR-30a-5p	37902	53348	0.415364	hsa-miR-221-5p	14	255	0.052045
hsa-miR-26a-5p	194754	203370	0.489179	hsa-miR-484	9	314	0.027864
hsa-miR-320a	1301	7518	0.147522	hsa-miR-26b-5p	77	6052	0.012563
hsa-miR-548aj-5p	14	0	1	hsa-miR-24-3p	212	2956	0.066919
hsa-miR-548ap-5p	6	0	1	hsa-let-7g-5p	190	11791	0.015858
hsa-miR-30e-5p	55120	3902	0.933889	hsa-miR-142-5p	430	3906	0.09917
hsa-miR-374a-3p	10	90	0.1	hsa-miR-214-3p	109	761	0.125287
hsa-miR-1271-5p	73	348	0.173397	hsa-miR-328	64	766	0.077108
hsa-miR-141-3p	981	13335	0.068525	hsa-let-7f-2-3p	112	0	1
hsa-let-7c	36468	100312	0.266618	hsa-miR-21-5p	2909	125464	0.022661
hsa-miR-136-3p	29	55	0.345238	hsa-miR-27b-3p	15843	134177	0.105606
hsa-miR-181a-5p	4056	108132	0.036154	hsa-miR-941	20	3654	0.005444
hsa-miR-186-5p	537	13493	0.038275	hsa-miR-197-3p	8	633	0.01248
hsa-miR-339-5p	16	24	0.4	hsa-miR-889	6	67	0.082192
hsa-miR-550a-5p	16	12	0.571429	hsa-miR-532-5p	10	3090	0.003226
hsa-miR-3605-5p	11	99	0.1	hsa-miR-330-3p	116	56	0.674419
hsa-miR-378b	71	0	1	hsa-miR-625-3p	5	116	0.041322
hsa-miR-486-5p	3182	125749	0.02468	hsa-miR-548h-5p	84	0	1
hsa-miR-339-3p	11	168	0.061453	hsa-let-7d-3p	26	1099	0.023111
hsa-miR-548ay-5p	21	4	0.84	hsa-miR-145-5p	1928	47322	0.039147
hsa-miR-1299	7	4	0.636364	hsa-miR-130a-3p	40	7069	0.005627
hsa-miR-548c-3p	5	0	1	hsa-miR-150-5p	23	3024	0.007548
hsa-miR-576-5p	7	23	0.233333	hsa-miR-126-3p	171	235	0.421182
hsa-miR-218-5p	84	322	0.206897	hsa-miR-21-3p	46	1700	0.026346
hsa-miR-135a-5p	16	43	0.271186	hsa-miR-361-3p	5	300	0.016393
hsa-miR-320b	255	805	0.240566	hsa-miR-222-3p	224	5988	0.036059
hsa-miR-582-5p	14	27	0.341463	hsa-let-7e-5p	203879	15356	0.929956
hsa-miR-93-5p	48	1775	0.02633	hsa-miR-4510	90	0	1
hsa-let-7a-5p	687000	181413	0.791098	hsa-miR-148b-3p	196	359	0.353153
hsa-miR-192-5p	4067	205643	0.019393	hsa-miR-3652	5	13	0.277778
hsa-miR-151b	241	1719	0.122959	hsa-miR-100-5p	189702	255683	0.425928
hsa-miR-29b-3p	54	122	0.306818	hsa-miR-500a-3p	5001	2542	0.662999
hsa-miR-99a-3p	46	276	0.142857	hsa-miR-142-3p	26	92	0.220339
hsa-miR-6511b-3p	21	24	0.466667	hsa-miR-146b-3p	21	731	0.027926
hsa-miR-200c-3p	53	2296	0.022563	hsa-miR-22-3p	1216	36573	0.032179
hsa-miR-96-5p	69	105	0.396552	hsa-miR-182-5p	19587	308444	0.059711
hsa-miR-200b-3p	225	3816	0.055679	hsa-miR-16-5p	57	5143	0.010962
hsa-miR-548ar-5p	14	0	1	hsa-miR-411-5p	62	451	0.120858
hsa-miR-1273e	6	0	1	hsa-miR-103a-3p	640	13990	0.043746
hsa-miR-92a-3p	11458	68665	0.143005	hsa-miR-664a-3p	45	311	0.126404
hsa-miR-130b-3p	20	161	0.110497	hsa-miR-143-5p	283	334	0.458671
hsa-miR-548z	5	0	1	hsa-miR-199b-5p	34	829	0.039397
hsa-miR-937-3p	6	25	0.193548	hsa-miR-342-5p	13	136	0.087248
hsa-miR-199b-3p	4239	12475	0.25362	hsa-miR-1247-3p	9	113	0.07377
hsa-miR-548i	88	0	1	hsa-miR-548c-5p	47	0	1
hsa-miR-660-5p	153	383	0.285448	hsa-miR-27b-5p	38	930	0.039256
hsa-miR-454-3p	5	99	0.048077	hsa-miR-19a-3p	610	80	0.884058
hsa-miR-331-3p	7	22	0.241379	hsa-miR-27a-3p	292	2531	0.103436
hsa-miR-410	114	282	0.287879	hsa-miR-671-5p	23	0	1
hsa-miR-421	66	388	0.145374	hsa-miR-191-5p	12381	480062	0.025142
hsa-miR-151a-5p	3254	21825	0.12975
hsa-miR-378g	336	0	1
hsa-miR-1285-3p	16	23	0.410256
hsa-miR-151a-3p	1737	41992	0.039722
hsa-miR-379-3p	6	0	1
hsa-miR-1304-3p	35	11	0.76087
hsa-miR-30a-3p	2183	2521	0.464073
hsa-miR-136-5p	9	26	0.257143
hsa-miR-26b-3p	25	103	0.195312
hsa-miR-107	306	1994	0.133043
hsa-miR-4804-5p	6	0	1
hsa-miR-582-3p	14	112	0.111111
hsa-miR-340-5p	64	535	0.106845
hsa-miR-148a-3p	36744	83101	0.306596
hsa-miR-20b-5p	21	36	0.368421
hsa-miR-1260a	24	0	1
hsa-miR-25-3p	1274	18157	0.065565
hsa-miR-106b-3p	70	837	0.077178
hsa-miR-4482-3p	5	15	0.25
hsa-miR-1269b	8	0	1
hsa-miR-376a-3p	12	0	1
hsa-miR-548h-3p	5	0	1
hsa-miR-204-5p	568	17272	0.031839
hsa-miR-409-3p	10	1250	0.007937
hsa-miR-423-5p	3659	8451	0.302147
hsa-miR-425-5p	138	325	0.298056
hsa-miR-181c-5p	141	4389	0.031126
hsa-miR-212-5p	28	85	0.247788
hsa-miR-125b-2-3p	180	11731	0.015112
hsa-miR-183-5p	2008	5475	0.268342
hsa-miR-874	58	344	0.144279
hsa-miR-338-3p	48	218	0.180451
hsa-miR-200a-3p	11816	882	0.93054
hsa-miR-98-5p	59	3389	0.017111
hsa-miR-944	8	22	0.266667
hsa-miR-501-3p	2087	3002	0.4101
hsa-miR-29a-3p	1870	3002	0.383826
hsa-miR-378f	318	0	1
hsa-miR-223-5p	6	10	0.375
hsa-miR-140-3p	768	2164	0.261937
hsa-miR-106b-5p	18	33	0.352941
hsa-miR-887	41	85	0.325397
hsa-miR-15a-5p	161	412	0.280977
hsa-miR-484	85	564	0.130971
hsa-miR-548as-5p	14	0	1
hsa-miR-26b-5p	3974	8567	0.316881
hsa-miR-147a	5	0	1
hsa-let-7g-5p	591	22664	0.025414
hsa-miR-365b-3p	99	172	0.365314
hsa-miR-214-3p	114	287	0.284289
hsa-miR-21-5p	1227	103759	0.011687
hsa-miR-27b-3p	113886	229310	0.33184
hsa-miR-197-3p	9	157	0.054217
hsa-miR-155-5p	5	1439	0.003463
hsa-miR-532-5p	62	2440	0.02478
hsa-miR-24-2-5p	6	50	0.107143
hsa-miR-548g-5p	14	0	1
hsa-let-7d-3p	79	1186	0.062451
hsa-miR-548h-5p	85	0	1
hsa-miR-145-5p	5745	43285	0.117173
hsa-miR-20a-5p	31	69	0.31
hsa-miR-106a-5p	5	27	0.15625
hsa-miR-130a-3p	2329	4763	0.328398
hsa-miR-21-3p	836	1983	0.296559
hsa-miR-222-3p	637	16277	0.037661
hsa-miR-148b-3p	212	320	0.398496
hsa-miR-100-5p	167825	338383	0.331534
hsa-miR-500a-3p	3612	1669	0.683961
hsa-miR-142-3p	22	86	0.203704
hsa-miR-22-3p	8471	63677	0.117411
hsa-miR-16-5p	7877	8042	0.494818
hsa-miR-411-5p	155	490	0.24031
hsa-miR-664a-3p	6	269	0.021818
hsa-miR-143-5p	167	434	0.27787
hsa-miR-215	280	13939	0.019692
hsa-miR-1247-3p	12	187	0.060302
hsa-miR-301a-3p	36	73	0.330275
hsa-miR-365a-3p	99	172	0.365314
hsa-miR-27a-3p	1625	3164	0.339319
hsa-miR-1291	8	22	0.266667
hsa-miR-744-3p	9	12	0.428571
hsa-miR-1285-5p	13	9	0.590909
hsa-miR-141-5p	9	57	0.136364
hsa-miR-191-5p	120414	243542	0.330848

## Sheet: S4
N				T
miRNA	Count with base edit	Count without base edit	Count with base edit/Total	miRNA	Count with base edit	Count without base edit	Count with base edit/Total
hsa-miR-361-5p	86	1569	0.051964	hsa-miR-140-5p	5	168	0.028902
hsa-miR-1260b	8	0	1	hsa-miR-361-5p	298	2572	0.103833
hsa-miR-502-3p	419	167	0.715017	hsa-miR-193a-3p	7	32	0.179487
hsa-miR-30d-5p	154553	34704	0.81663	hsa-miR-502-3p	418	516	0.447537
hsa-miR-30c-2-3p	64	1737	0.035536	hsa-miR-30d-5p	313178	53347	0.854452
hsa-miR-30e-3p	11127	7404	0.600453	hsa-miR-30c-2-3p	28	474	0.055777
hsa-miR-3622a-5p	38	5	0.883721	hsa-miR-30e-3p	5117	2926	0.636205
hsa-miR-149-5p	79	674	0.104914	hsa-miR-3622a-5p	28	9	0.756757
hsa-miR-381-3p	163	997	0.140517	hsa-miR-149-5p	59	504	0.104796
hsa-miR-378i	2387	0	1	hsa-miR-34c-5p	67	313	0.176316
hsa-miR-23c	6448	0	1	hsa-miR-381-3p	890	1835	0.326606
hsa-miR-221-3p	1976	13514	0.127566	hsa-miR-378i	2964	0	1
hsa-miR-652-3p	8	17	0.32	hsa-miR-23c	12623	0	1
hsa-miR-6514-5p	8	8	0.5	hsa-miR-221-3p	12068	27832	0.302456
hsa-miR-92b-3p	2857	15517	0.155491	hsa-miR-374b-3p	21	56	0.272727
hsa-miR-542-3p	5	78	0.060241	hsa-miR-185-5p	23	61	0.27381
hsa-miR-374b-5p	24	581	0.039669	hsa-miR-6503-3p	8	5	0.615385
hsa-miR-29c-5p	11	69	0.1375	hsa-miR-17-5p	10	241	0.039841
hsa-let-7i-5p	7011	41126	0.145647	hsa-miR-873-5p	73	142	0.339535
hsa-miR-589-5p	26	298	0.080247	hsa-miR-92b-3p	3172	6163	0.339796
hsa-miR-548w	17	4	0.809524	hsa-miR-4662a-5p	9	18	0.333333
hsa-miR-181c-3p	17	262	0.060932	hsa-miR-542-3p	38	152	0.2
hsa-miR-181a-2-3p	65	2039	0.030894	hsa-miR-374b-5p	96	1338	0.066946
hsa-miR-127-3p	1227	26627	0.044051	hsa-miR-29c-5p	22	133	0.141935
hsa-miR-654-3p	8	510	0.015444	hsa-let-7i-5p	14046	33151	0.297604
hsa-miR-335-3p	44	199	0.18107	hsa-miR-33a-5p	28	21	0.571429
hsa-miR-23b-3p	1169	7319	0.137724	hsa-miR-30c-1-3p	15	214	0.065502
hsa-miR-5096	13	0	1	hsa-miR-589-5p	12	279	0.041237
hsa-miR-125b-5p	49746	43203	0.535197	hsa-miR-548w	6	1	0.857143
hsa-miR-429	16	268	0.056338	hsa-miR-154-5p	14	25	0.358974
hsa-miR-133a	1506	4671	0.243808	hsa-miR-561-5p	12	47	0.20339
hsa-miR-200b-5p	40	298	0.118343	hsa-miR-181c-3p	19	730	0.025367
hsa-miR-548d-5p	24	0	1	hsa-miR-181a-2-3p	14	885	0.015573
hsa-miR-671-3p	40	745	0.050955	hsa-miR-127-3p	13597	54973	0.198294
hsa-miR-1301	8	70	0.102564	hsa-miR-654-3p	53	945	0.053106
hsa-miR-9-5p	78	786	0.090278	hsa-miR-335-3p	86	188	0.313869
hsa-miR-184	9	259	0.033582	hsa-miR-23b-3p	3788	14310	0.209305
hsa-miR-210	10	160	0.058824	hsa-miR-3613-5p	12	37	0.244898
hsa-miR-23a-3p	291	3010	0.088155	hsa-miR-5096	5	5	0.5
hsa-miR-143-3p	93523	16270372	0.005715	hsa-miR-125b-5p	70968	28992	0.709964
hsa-miR-378c	17	237	0.066929	hsa-miR-429	76	994	0.071028
hsa-miR-135b-5p	20	0	1	hsa-miR-27a-5p	5	150	0.032258
hsa-miR-195-5p	101	1310	0.07158	hsa-miR-133a	8450	10951	0.435545
hsa-miR-125a-5p	32075	143405	0.182784	hsa-miR-200b-5p	29	61	0.322222
hsa-miR-10b-5p	459643	10256975	0.042891	hsa-miR-548d-5p	12	10	0.545455
hsa-miR-1269a	7	0	1	hsa-miR-671-3p	16	346	0.044199
hsa-miR-4454	15	122	0.109489	hsa-miR-9-5p	99	207	0.323529
hsa-miR-374a-5p	5	169	0.028736	hsa-miR-184	7	383	0.017949
hsa-miR-3195	9	0	1	hsa-miR-210	38	156	0.195876
hsa-miR-423-3p	366	4158	0.080902	hsa-miR-23a-3p	1268	5620	0.184088
hsa-miR-487b	7	51	0.12069	hsa-miR-143-3p	345636	18180576	0.018657
hsa-miR-146a-5p	340	2589	0.116081	hsa-miR-378c	51	461	0.099609
hsa-miR-668	8	0	1	hsa-miR-135b-5p	115	6	0.950413
hsa-miR-28-3p	11512	81461	0.123821	hsa-miR-195-5p	1196	5179	0.187608
hsa-miR-31-5p	16	275	0.054983	hsa-miR-7-1-3p	17	24	0.414634
hsa-miR-10a-5p	9826111	367164	0.96398	hsa-miR-125a-5p	57884	101428	0.363337
hsa-miR-181d	7249	1182	0.859803	hsa-miR-10b-5p	329256	1950436	0.14443
hsa-miR-504	12	252	0.045455	hsa-miR-2110	7	17	0.291667
hsa-miR-744-5p	43	984	0.04187	hsa-miR-148b-5p	42	176	0.192661
hsa-miR-99a-5p	355191	104526	0.77263	hsa-miR-487a	7	20	0.259259
hsa-miR-196a-5p	2366	24	0.989958	hsa-miR-4454	27	98	0.216
hsa-miR-548aq-5p	5	0	1	hsa-miR-374a-5p	83	799	0.094104
hsa-miR-3607-3p	29	459	0.059426	hsa-miR-423-3p	273	4330	0.059309
hsa-miR-126-5p	92	8989	0.010131	hsa-miR-487b	38	148	0.204301
hsa-miR-3605-3p	23	135	0.14557	hsa-miR-450b-5p	101	247	0.29023
hsa-miR-4677-3p	14	101	0.121739	hsa-miR-331-5p	11	37	0.229167
hsa-miR-1247-5p	22	285	0.071661	hsa-miR-146a-5p	749	10857	0.064536
hsa-miR-497-5p	25	373	0.062814	hsa-miR-3960	6	0	1
hsa-miR-101-3p	812	5628	0.126087	hsa-miR-28-3p	11034	27409	0.287022
hsa-miR-194-5p	16	113	0.124031	hsa-miR-425-3p	11	199	0.052381
hsa-miR-422a	12	0	1	hsa-miR-31-5p	34	316	0.097143
hsa-miR-152	9	498	0.017751	hsa-miR-10a-5p	1866331	286615	0.866873
hsa-miR-376c-3p	11	0	1	hsa-miR-452-5p	9	99	0.083333
hsa-miR-363-3p	477	2634	0.153327	hsa-miR-181d	5169	1654	0.757585
hsa-miR-193b-3p	28	517	0.051376	hsa-let-7a-3p	120	119	0.502092
hsa-miR-148a-5p	229	3923	0.055154	hsa-miR-504	15	163	0.08427
hsa-miR-30b-5p	93	1353	0.064315	hsa-miR-744-5p	15	1082	0.013674
hsa-miR-205-5p	3970	20166	0.164485	hsa-miR-99a-5p	438127	175457	0.714046
hsa-miR-378h	44	0	1	hsa-miR-532-3p	24	56	0.3
hsa-miR-1255a	9	12	0.428571	hsa-miR-196a-5p	6030	93	0.984811
hsa-miR-375	4955	176627	0.027288	hsa-miR-3607-3p	6	26	0.1875
hsa-miR-99b-5p	52461	604507	0.079853	hsa-miR-126-5p	1637	72942	0.02195
hsa-miR-424-3p	7	5	0.583333	hsa-miR-4677-3p	25	32	0.438596
hsa-miR-146b-5p	3190	25041	0.112996	hsa-miR-758-3p	8	19	0.296296
hsa-miR-378a-3p	1871	19180	0.088879	hsa-miR-1247-5p	6	154	0.0375
hsa-miR-493-5p	10	76	0.116279	hsa-miR-383	5	51	0.089286
hsa-miR-221-5p	55	1283	0.041106	hsa-miR-490-3p	5	109	0.04386
hsa-miR-24-3p	1178	3598	0.24665	hsa-miR-25-5p	5	11	0.3125
hsa-miR-15b-5p	5	116	0.041322	hsa-miR-497-5p	112	2185	0.048759
hsa-miR-142-5p	209	1627	0.113834	hsa-miR-378d	14	109	0.113821
hsa-miR-328	47	1492	0.030539	hsa-miR-101-3p	7842	13208	0.372542
hsa-miR-330-5p	10	14	0.416667	hsa-miR-101-5p	14	71	0.164706
hsa-let-7f-2-3p	11	0	1	hsa-miR-194-5p	134	146	0.478571
hsa-miR-6511a-3p	168	46	0.785047	hsa-miR-422a	18	0	1
hsa-miR-486-3p	6	31	0.162162	hsa-miR-152	35	1283	0.026555
hsa-miR-941	400	2402	0.142755	hsa-miR-376c-3p	44	45	0.494382
hsa-miR-330-3p	12	31	0.27907	hsa-miR-363-3p	2081	4945	0.296186
hsa-miR-28-5p	132	1814	0.067831	hsa-miR-193b-3p	156	755	0.17124
hsa-miR-625-3p	6	55	0.098361	hsa-miR-148a-5p	481	1915	0.200751
hsa-miR-4448	38	0	1	hsa-miR-30b-5p	360	3296	0.098468
hsa-miR-126-3p	280	856	0.246479	hsa-miR-205-5p	8858	16699	0.346598
hsa-miR-150-5p	82	554	0.128931	hsa-miR-378h	30	0	1
hsa-miR-361-3p	50	344	0.126904	hsa-miR-375	5037	48475	0.094128
hsa-let-7e-5p	115859	8238	0.933616	hsa-miR-99b-5p	38652	437460	0.081183
hsa-miR-200a-5p	8	60	0.117647	hsa-miR-146b-5p	3694	37338	0.090027
hsa-miR-4510	76	0	1	hsa-miR-548au-5p	8	4	0.666667
hsa-let-7b-3p	5	22	0.185185	hsa-miR-378a-3p	1703	12138	0.12304
hsa-miR-146b-3p	13	314	0.039755	hsa-miR-493-5p	294	704	0.294589
hsa-miR-182-5p	18017	121223	0.129395	hsa-miR-133b	81	233	0.257962
hsa-let-7e-3p	8	90	0.081633	hsa-miR-221-5p	21	1401	0.014768
hsa-miR-103a-3p	2887	11372	0.202469	hsa-miR-24-3p	10104	10144	0.499012
hsa-miR-345-5p	30	349	0.079156	hsa-miR-15b-5p	14	461	0.029474
hsa-miR-342-5p	5	147	0.032895	hsa-miR-223-3p	72	384	0.157895
hsa-miR-199b-5p	43	1138	0.03641	hsa-miR-142-5p	4859	9767	0.332217
hsa-miR-2467-5p	15	9	0.625	hsa-miR-328	31	972	0.030907
hsa-let-7g-3p	17	14	0.548387	hsa-let-7f-2-3p	110	9	0.92437
hsa-miR-769-5p	54	1916	0.027411	hsa-miR-139-5p	11	185	0.056122
hsa-miR-411-3p	6	0	1	hsa-miR-6511a-3p	108	18	0.857143
hsa-miR-27b-5p	54	2324	0.022708	hsa-miR-486-3p	14	29	0.325581
hsa-miR-19a-3p	696	74	0.903896	hsa-miR-941	796	2260	0.260471
hsa-miR-1273f	7	0	1	hsa-miR-889	49	247	0.165541
hsa-miR-181b-5p	2758	7376	0.272153	hsa-miR-330-3p	12	38	0.24
hsa-miR-196b-5p	189	1603	0.105469	hsa-miR-28-5p	129	6153	0.020535
hsa-miR-199a-3p	1122	11884	0.086268	hsa-miR-625-3p	7	17	0.291667
hsa-miR-128	41	329	0.110811	hsa-miR-323a-3p	10	15	0.4
hsa-miR-134	15	204	0.068493	hsa-miR-138-5p	5	20	0.2
hsa-miR-574-3p	21	711	0.028689	hsa-miR-4448	20	0	1
hsa-miR-145-3p	315	7530	0.040153	hsa-miR-451a	143	6212	0.022502
hsa-miR-342-3p	1877	7526	0.199617	hsa-miR-126-3p	1257	4021	0.238158
hsa-miR-125b-1-3p	17	1150	0.014567	hsa-miR-150-5p	949	1815	0.343343
hsa-miR-30d-3p	5	186	0.026178	hsa-miR-361-3p	244	441	0.356204
hsa-miR-1307-5p	82	139	0.371041	hsa-let-7e-5p	83231	4713	0.946409
hsa-miR-224-5p	26	160	0.139785	hsa-miR-200a-5p	23	44	0.343284
hsa-miR-30c-5p	560	4185	0.118019	hsa-miR-539-3p	5	50	0.090909
hsa-let-7b-5p	87263	17005	0.836911	hsa-miR-4510	63	2	0.969231
hsa-miR-29c-3p	1679	417	0.80105	hsa-miR-628-5p	40	67	0.373832
hsa-miR-19b-3p	508	705	0.418796	hsa-let-7b-3p	11	37	0.229167
hsa-miR-455-5p	8	52	0.133333	hsa-miR-146b-3p	26	188	0.121495
hsa-let-7f-5p	290714	157244	0.648976	hsa-miR-182-5p	13477	32317	0.294296
hsa-miR-181a-3p	11	676	0.016012	hsa-miR-100-3p	18	69	0.206897
hsa-miR-203a	19	810	0.022919	hsa-miR-103a-3p	10002	9121	0.523035
hsa-miR-195-3p	26	480	0.051383	hsa-let-7i-3p	14	42	0.25
hsa-miR-199a-5p	304	2368	0.113772	hsa-miR-345-5p	119	1284	0.084818
hsa-miR-34a-5p	50	255	0.163934	hsa-miR-199b-5p	414	6897	0.056627
hsa-let-7d-5p	654	2555	0.203802	hsa-miR-769-5p	97	2138	0.0434
hsa-miR-30a-5p	49886	152728	0.246212	hsa-miR-411-3p	12	3	0.8
hsa-miR-26a-5p	23944	197924	0.10792	hsa-miR-548c-5p	16	6	0.727273
hsa-miR-1287	6	0	1	hsa-miR-27b-5p	161	2255	0.066639
hsa-miR-320a	106	4357	0.023751	hsa-miR-19a-3p	1326	139	0.905119
hsa-miR-30e-5p	154163	4923	0.969054	hsa-miR-15b-3p	6	23	0.206897
hsa-miR-374a-3p	35	301	0.104167	hsa-miR-32-5p	12	54	0.181818
hsa-miR-1271-5p	104	790	0.116331	hsa-miR-132-5p	12	69	0.148148
hsa-miR-141-3p	404	7591	0.050532	hsa-miR-181b-5p	3634	5253	0.408912
hsa-let-7c	35052	87624	0.285728	hsa-miR-196b-5p	417	3762	0.099785
hsa-miR-181a-5p	10132	178734	0.053647	hsa-miR-199a-3p	14497	54433	0.210315
hsa-miR-186-5p	1609	9273	0.147859	hsa-miR-574-3p	398	1441	0.216422
hsa-miR-3605-5p	13	125	0.094203	hsa-miR-128	50	930	0.05102
hsa-miR-378b	78	0	1	hsa-miR-134	23	244	0.086142
hsa-miR-486-5p	18732	128039	0.127627	hsa-miR-145-3p	1723	27380	0.059204
hsa-miR-339-3p	5	47	0.096154	hsa-miR-342-3p	2986	5373	0.35722
hsa-miR-548ay-5p	12	0	1	hsa-miR-125b-1-3p	44	2358	0.018318
hsa-miR-218-5p	18	136	0.116883	hsa-miR-190a	6	41	0.12766
hsa-miR-30b-3p	8	3	0.727273	hsa-miR-30d-3p	14	369	0.036554
hsa-miR-135a-5p	16	29	0.355556	hsa-miR-409-5p	101	307	0.247549
hsa-miR-320b	18	593	0.02946	hsa-miR-1307-5p	135	209	0.392442
hsa-miR-1296	18	194	0.084906	hsa-miR-208b	6	45	0.117647
hsa-miR-93-5p	26	1640	0.015606	hsa-miR-224-5p	102	237	0.300885
hsa-let-7a-5p	563136	121558	0.822464	hsa-miR-30c-5p	1735	7785	0.182248
hsa-miR-192-5p	241	12641	0.018708	hsa-let-7b-5p	59107	17019	0.776436
hsa-miR-151b	198	1457	0.119637	hsa-miR-29c-3p	10179	3469	0.745824
hsa-miR-654-5p	5	0	1	hsa-miR-19b-3p	2290	1357	0.627913
hsa-miR-6511b-3p	38	33	0.535211	hsa-miR-455-5p	79	380	0.172113
hsa-miR-200c-3p	33	1596	0.020258	hsa-let-7f-5p	250115	98103	0.718271
hsa-miR-96-5p	26	147	0.150289	hsa-miR-548ab	9	2	0.818182
hsa-miR-200b-3p	31	1443	0.021031	hsa-miR-181a-3p	10	299	0.032362
hsa-miR-337-3p	6	15	0.285714	hsa-miR-203a	171	972	0.149606
hsa-miR-92a-3p	16713	46476	0.264492	hsa-miR-664a-5p	6	30	0.166667
hsa-miR-130b-3p	24	153	0.135593	hsa-miR-195-3p	7	234	0.029046
hsa-miR-598	19	74	0.204301	hsa-miR-199a-5p	1623	9415	0.147038
hsa-miR-199b-3p	561	11880	0.045093	hsa-miR-34a-5p	130	1191	0.09841
hsa-miR-548i	80	0	1	hsa-miR-144-3p	27	135	0.166667
hsa-miR-660-5p	28	504	0.052632	hsa-miR-335-5p	7	220	0.030837
hsa-miR-454-3p	23	125	0.155405	hsa-let-7d-5p	1578	3205	0.329918
hsa-miR-331-3p	5	46	0.098039	hsa-miR-30a-5p	112089	307292	0.267272
hsa-miR-410	97	648	0.130201	hsa-miR-99b-3p	5	174	0.027933
hsa-miR-421	67	498	0.118584	hsa-miR-26a-5p	124433	684957	0.153737
hsa-miR-151a-5p	2185	15030	0.126924	hsa-miR-1287	19	50	0.275362
hsa-miR-378g	248	0	1	hsa-miR-16-2-3p	47	114	0.291925
hsa-miR-641	5	22	0.185185	hsa-miR-320a	870	3562	0.1963
hsa-miR-151a-3p	3345	48153	0.064954	hsa-miR-30e-5p	323363	22902	0.93386
hsa-miR-1304-3p	82	1	0.987952	hsa-miR-374a-3p	155	239	0.393401
hsa-miR-30a-3p	7701	12482	0.381559	hsa-miR-1271-5p	367	566	0.393355
hsa-miR-107	404	3506	0.103325	hsa-miR-141-3p	4153	49360	0.077607
hsa-miR-582-3p	22	313	0.065672	hsa-let-7c	40707	54136	0.429204
hsa-miR-340-5p	222	1397	0.137122	hsa-miR-136-3p	295	931	0.24062
hsa-miR-148a-3p	4527	205404	0.021564	hsa-miR-181a-5p	9312	125830	0.068905
hsa-miR-1260a	83	0	1	hsa-miR-186-5p	18633	34503	0.350666
hsa-miR-25-3p	3633	23612	0.133346	hsa-miR-486-5p	22708	46968	0.325908
hsa-miR-4507	6	0	1	hsa-miR-3605-5p	6	57	0.095238
hsa-miR-106b-3p	30	1271	0.023059	hsa-miR-378b	101	0	1
hsa-miR-1307-3p	10	253	0.038023	hsa-miR-339-3p	12	194	0.058252
hsa-miR-376a-3p	24	0	1	hsa-miR-651	8	15	0.347826
hsa-miR-204-5p	654	24686	0.025809	hsa-miR-576-5p	9	24	0.272727
hsa-miR-409-3p	45	3142	0.01412	hsa-miR-218-5p	469	1039	0.311008
hsa-miR-423-5p	441	4860	0.083192	hsa-miR-369-5p	45	92	0.328467
hsa-miR-425-5p	26	180	0.126214	hsa-miR-656	8	18	0.307692
hsa-miR-181c-5p	312	6412	0.046401	hsa-miR-582-5p	24	102	0.190476
hsa-miR-212-5p	13	98	0.117117	hsa-miR-135a-5p	22	134	0.141026
hsa-miR-125b-2-3p	419	14485	0.028113	hsa-miR-320b	224	454	0.330383
hsa-miR-183-5p	1252	9584	0.115541	hsa-miR-338-5p	24	42	0.363636
hsa-miR-338-3p	17	84	0.168317	hsa-miR-1296	7	289	0.023649
hsa-miR-874	6	327	0.018018	hsa-miR-93-5p	208	3187	0.061267
hsa-miR-200a-3p	6452	297	0.955993	hsa-let-7a-5p	421147	85123	0.831862
hsa-miR-501-3p	3351	5590	0.37479	hsa-miR-192-5p	628	8872	0.066105
hsa-miR-98-5p	755	4005	0.158613	hsa-miR-548k	37	73	0.336364
hsa-miR-29a-3p	533	2431	0.179825	hsa-miR-7-5p	18	15	0.545455
hsa-miR-378f	235	0	1	hsa-miR-151b	536	1024	0.34359
hsa-miR-548f	16	10	0.615385	hsa-miR-29b-3p	214	379	0.360877
hsa-miR-140-3p	316	3899	0.07497	hsa-miR-654-5p	5	13	0.277778
hsa-miR-106b-5p	49	48	0.505155	hsa-miR-99a-3p	143	560	0.203414
hsa-miR-505-3p	7	8	0.466667	hsa-miR-6511b-3p	17	28	0.377778
hsa-miR-887	5	145	0.033333	hsa-miR-200c-3p	177	2123	0.076957
hsa-miR-15a-5p	19	211	0.082609	hsa-miR-301b	18	41	0.305085
hsa-miR-379-5p	5	38	0.116279	hsa-miR-96-5p	163	362	0.310476
hsa-miR-484	29	444	0.061311	hsa-miR-200b-3p	244	2350	0.094063
hsa-miR-548as-5p	5	0	1	hsa-miR-92a-3p	44125	44677	0.496892
hsa-miR-26b-5p	212	10277	0.020212	hsa-miR-130b-3p	77	146	0.345291
hsa-miR-132-3p	8	107	0.069565	hsa-miR-598	44	118	0.271605
hsa-miR-1273a	7	0	1	hsa-miR-891a	10	26	0.277778
hsa-let-7g-5p	1947	10854	0.152097	hsa-miR-17-3p	7	126	0.052632
hsa-miR-365b-3p	20	276	0.067568	hsa-miR-660-5p	224	2080	0.097222
hsa-miR-214-3p	80	397	0.167715	hsa-miR-548i	44	6	0.88
hsa-miR-432-5p	52	465	0.10058	hsa-miR-199b-3p	7248	54420	0.117533
hsa-miR-21-5p	10970	61667	0.151025	hsa-miR-454-3p	183	423	0.30198
hsa-miR-27b-3p	12594	275223	0.043757	hsa-miR-187-3p	31	586	0.050243
hsa-miR-197-3p	48	242	0.165517	hsa-miR-410	368	723	0.337305
hsa-miR-155-5p	34	463	0.06841	hsa-miR-421	287	667	0.300839
hsa-miR-532-5p	269	4815	0.052911	hsa-miR-151a-5p	9263	16448	0.360274
hsa-miR-378a-5p	10	34	0.227273	hsa-miR-378g	489	1	0.997959
hsa-let-7d-3p	42	908	0.044211	hsa-miR-641	19	39	0.327586
hsa-miR-145-5p	2530	112631	0.021969	hsa-miR-151a-3p	1356	23912	0.053665
hsa-miR-20a-5p	21	50	0.295775	hsa-miR-379-3p	10	13	0.434783
hsa-miR-130a-3p	1303	9825	0.117092	hsa-miR-1304-3p	34	2	0.944444
hsa-miR-21-3p	19	1907	0.009865	hsa-miR-30a-3p	2956	7605	0.279898
hsa-miR-222-3p	2236	15831	0.123762	hsa-miR-577	22	41	0.349206
hsa-miR-148b-3p	122	557	0.179676	hsa-miR-4770	5	85	0.055556
hsa-miR-100-5p	162442	338360	0.324364	hsa-miR-136-5p	13	381	0.032995
hsa-miR-500a-3p	5670	3124	0.644758	hsa-miR-24-1-5p	16	53	0.231884
hsa-miR-22-3p	1716	68873	0.02431	hsa-miR-153	50	46	0.520833
hsa-miR-16-5p	316	8305	0.036655	hsa-miR-26b-3p	84	282	0.229508
hsa-miR-411-5p	106	801	0.116869	hsa-miR-494	8	13	0.380952
hsa-miR-664a-3p	56	690	0.075067	hsa-miR-548az-5p	9	1	0.9
hsa-miR-143-5p	265	411	0.392012	hsa-miR-107	1882	3339	0.360467
hsa-miR-301a-3p	54	203	0.210117	hsa-miR-582-3p	166	531	0.238164
hsa-miR-365a-3p	20	276	0.067568	hsa-miR-340-5p	607	960	0.387364
hsa-miR-27a-3p	171	3189	0.050893	hsa-miR-148a-3p	4874	158424	0.029847
hsa-miR-141-5p	14	64	0.179487	hsa-miR-20b-5p	9	164	0.052023
hsa-miR-191-5p	37929	252063	0.130793	hsa-miR-1260a	9	0	1
				hsa-miR-25-3p	6176	13749	0.309962
				hsa-miR-106b-3p	220	912	0.194346
				hsa-miR-548o-5p	16	6	0.727273
				hsa-miR-1269b	5	0	1
				hsa-miR-376a-3p	144	3	0.979592
				hsa-miR-548aq-3p	9	0	1
				hsa-miR-204-5p	606	18087	0.032419
				hsa-miR-409-3p	109	1829	0.056244
				hsa-miR-3065-5p	5	5	0.5
				hsa-miR-1	99	232	0.299094
				hsa-miR-423-5p	89	2415	0.035543
				hsa-miR-455-3p	5	48	0.09434
				hsa-miR-425-5p	252	512	0.329843
				hsa-miR-181c-5p	602	12752	0.04508
				hsa-miR-212-5p	40	172	0.188679
				hsa-miR-125b-2-3p	403	9657	0.04006
				hsa-miR-183-5p	4110	9994	0.291407
				hsa-miR-874	126	399	0.24
				hsa-miR-548am-5p	16	6	0.727273
				hsa-miR-338-3p	291	510	0.363296
				hsa-miR-200a-3p	44672	1234	0.973119
				hsa-miR-98-5p	2281	5321	0.300053
				hsa-miR-501-3p	5786	4361	0.570218
				hsa-miR-574-5p	9	189	0.045455
				hsa-miR-29a-3p	6877	12476	0.355345
				hsa-miR-378f	440	0	1
				hsa-miR-548f	10	3	0.769231
				hsa-miR-140-3p	1830	4405	0.293504
				hsa-miR-106b-5p	52	300	0.147727
				hsa-miR-505-3p	6	90	0.0625
				hsa-miR-887	131	409	0.242593
				hsa-miR-15a-5p	30	1804	0.016358
				hsa-miR-379-5p	45	79	0.362903
				hsa-miR-548as-5p	12	0	1
				hsa-miR-484	68	753	0.082826
				hsa-miR-625-5p	11	31	0.261905
				hsa-miR-26b-5p	2832	44838	0.059408
				hsa-miR-369-3p	14	22	0.388889
				hsa-miR-147a	11	0	1
				hsa-let-7g-5p	13550	28801	0.319945
				hsa-miR-365b-3p	126	492	0.203883
				hsa-miR-214-3p	203	547	0.270667
				hsa-miR-432-5p	121	368	0.247444
				hsa-miR-6724-5p	8	10	0.444444
				hsa-miR-628-3p	24	73	0.247423
				hsa-miR-21-5p	35391	84867	0.294292
				hsa-miR-27b-3p	204508	772013	0.209425
				hsa-miR-197-3p	85	150	0.361702
				hsa-miR-155-5p	103	1732	0.056131
				hsa-miR-532-5p	370	6026	0.057849
				hsa-miR-24-2-5p	28	77	0.266667
				hsa-miR-378a-5p	30	71	0.29703
				hsa-miR-548h-5p	50	4	0.925926
				hsa-let-7d-3p	93	728	0.113276
				hsa-miR-433	8	16	0.333333
				hsa-miR-145-5p	24193	71834	0.25194
				hsa-miR-20a-5p	44	269	0.140575
				hsa-miR-130a-3p	4052	7313	0.356533
				hsa-miR-21-3p	263	4818	0.051761
				hsa-miR-222-3p	5767	12548	0.314879
				hsa-miR-2355-5p	20	27	0.425532
				hsa-miR-148b-3p	299	1654	0.153098
				hsa-miR-590-3p	6	23	0.206897
				hsa-miR-100-5p	223603	389228	0.364869
				hsa-miR-500a-3p	5395	4139	0.56587
				hsa-miR-142-3p	43	267	0.13871
				hsa-miR-22-3p	55582	205774	0.212668
				hsa-miR-16-5p	13634	31183	0.304215
				hsa-miR-411-5p	837	2066	0.288322
				hsa-miR-4485	25	667	0.036127
				hsa-miR-664a-3p	35	463	0.070281
				hsa-miR-214-5p	6	370	0.015957
				hsa-miR-143-5p	517	1051	0.329719
				hsa-miR-1247-3p	11	59	0.157143
				hsa-miR-301a-3p	334	724	0.31569
				hsa-miR-365a-3p	126	492	0.203883
				hsa-miR-27a-3p	4423	15813	0.218571
				hsa-miR-190b	6	39	0.133333
				hsa-miR-1285-5p	10	0	1
				hsa-miR-141-5p	43	191	0.183761
				hsa-miR-3912	10	29	0.25641
				hsa-miR-191-5p	116435	188028	0.382427

[truncated: 1 more sheets: S5]
